# Supplementary material for: Electrocatalytic Activation of Donor–Acceptor Cyclopropanes and Cyclobutanes: An Alternative C(sp3)−C(sp3) Cleavage Mode
Source: PubMed Central journal article supplement — Angew Chem Int Ed Engl. 2021 Jun 16;60(29):15928–34. doi: 10.1002/anie.202101477 (PMC8362004; doi:10.1002/anie.202101477), 2021-06-16
Supplement: ANIE-60-15928-s001.pdf [file ANIE-60-15928-s001.pdf]

Supporting Information

**Electrocatalytic Activation of Donor–Acceptor Cyclopropanes and Cyclobutanes: An Alternative C(sp<sup>3</sup>)–C(sp<sup>3</sup>) Cleavage Mode**

*Simon Kolb<sup>+</sup>, Martin Petzold<sup>+</sup>, Felix Brandt, Peter G. Jones, Christoph R. Jacob,<sup>\*</sup> and Daniel B. Werz<sup>\*</sup>*

anie\_202101477\_sm\_miscellaneous\_information.pdf

**Table of Contents**

|     |                                                            |             |
|-----|------------------------------------------------------------|-------------|
| 1.  | General Experimental .....                                 | <b>S2</b>   |
| 2.  | General Procedures .....                                   | <b>S3</b>   |
| 3.  | Synthesis of Starting Materials .....                      | <b>S6</b>   |
| 4.  | Electrochemical Synthesis of $\beta$ -Hydroxy Ketones..... | <b>S19</b>  |
| 5.  | Electrochemical Synthesis of Dioxanes.....                 | <b>S27</b>  |
| 6.  | Synthesis of $\gamma$ -Hydroxy Ketones .....               | <b>S32</b>  |
| 7.  | Synthesis of Follow-up Products .....                      | <b>S37</b>  |
| 8.  | Mechanistic Experiments .....                              | <b>S42</b>  |
| 9.  | Cyclic Voltammetry .....                                   | <b>S50</b>  |
| 10. | Computational Data.....                                    | <b>S52</b>  |
| 11. | NMR Data for Synthesized Compounds.....                    | <b>S68</b>  |
| 12. | Crystal Structure Determinations.....                      | <b>S118</b> |
| 13. | References .....                                           | <b>S123</b> |

## 1. General Experimental

All solvents were distilled before use and stored over molecular sieves unless otherwise stated. For electrochemical reactions commercially available hexafluoroisopropanol (HFIP, 99%) and acetonitrile (MeCN, *p.a.*) were used. Oxygen 4.5 that was used for electrochemical reactions, was provided by *Westfalen*. Glassy Carbon electrodes were obtained from *IKA*. Air- and moisture-sensitive reactions were carried out in oven-dried or flame-dried glassware, septum-capped under atmospheric pressure of argon. Commercially available compounds were used without further purification unless otherwise stated. For all purifications by column chromatography silica gel Geduran Si 60 (40-63  $\mu\text{m}$  pore size) from *Merck* and mixtures of pentane/ethyl acetate were used.

Proton ( $^1\text{H}$ ), carbon ( $^{13}\text{C}$ ) and fluorine ( $^{19}\text{F}$ ) NMR spectra were recorded on a *Bruker* AVIII400, *Bruker* AVIIIHD500 or *Bruker* AVII600 instrument using the residual signals from  $\text{CHCl}_3$ ,  $\delta = 7.26$  ppm and  $\delta = 77.16$  ppm or  $\text{CD}_3\text{OD}$   $\delta = 3.31$  ppm and  $\delta = 49.00$  ppm, as internal reference for  $^1\text{H}$  and  $^{13}\text{C}$  chemical shifts, respectively. Additionally, tetramethylsilane (TMS;  $\delta = 0.00$  ppm; 0.03%) was added to NMR samples. The following abbreviations were used for  $^1\text{H}$  and  $^{13}\text{C}$  NMR chemical shifts: s = singlet, d = doublet, t = triplet, m = multiplet. The chemical shift  $\delta$  is given in ppm. ESI-HRMS was carried out on an FTICR instrument and EI-HRMS was carried out on a *Jeol* AccuTOF GC JMS-T100GC instrument. IR spectra were recorded on an ATR spectrometer Tensor 27 from *Bruker*. IR data is reported as follows: w = weak, m = medium, s = strong, br = broad or combinations thereof. Melting points of solid products were recorded on a *Büchi* Melting Point M-560. Cyclic voltammetry was performed with a *Gamry* Instrument Interface 1010 Potentiostat/Galvanostat/ZRA). A self-made three-electrode setup with two platinum wires (0.5 mm diameter) as working and counter electrodes and a silver wire (0.5 mm diameter) as a quasi-reference electrode was used. For all electrochemical reactions an *IKA* ElectraSyn 2.0 apparatus was used. Exact reaction conditions are given in the following procedures.

## 2. General Procedures

### General procedures (GP1) for the cyclization of dichlorides to D–A cyclobutanes (D–A CBs)

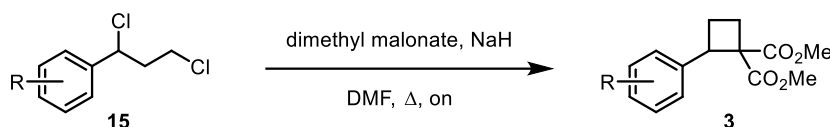

#### General procedure GP1:

GP1 is based on a known literature procedure.<sup>[1]</sup> NaH (60% in mineral oil, 1.05 eq.) was added at rt to a solution of dichloride (1.0 eq.) and dimethyl malonate (1.10 eq.) in DMF (5 mL per mmol) and the reaction mixture was refluxed at 100 °C for 1 h. Another portion of NaH (60% in mineral oil, 1.05 eq.) was added at 100 °C and the mixture was further refluxed overnight. After cooling to room temperature, H<sub>2</sub>O and Et<sub>2</sub>O were added and the phases were separated. The aq. phase was extracted with Et<sub>2</sub>O and the combined organic layers were washed with aq. sat. NaCl solution and dried over anhydrous Na<sub>2</sub>SO<sub>4</sub>. Removal of the solvents *in vacuo* and subsequent purification by column chromatography afforded the desired cyclobutanes **3**.

### General procedures (GP2-A/B/C) for the electrochemical conversion of D–A cyclopropanes (D–A CPs) to β-hydroxy ketones

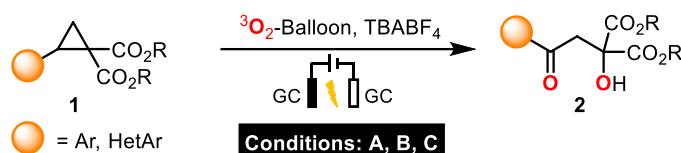

#### General procedure GP2-A (Conditions A):

In a 5 mL ElectraSyn vial cyclopropane **1** (150 μmol, 1.00 eq.) and TBABF<sub>4</sub> (0.02 M) were dissolved in HFIP (3 mL) and the solution was saturated with oxygen for 5 minutes. The solution was electrolyzed at a glassy carbon anode and a glassy carbon cathode at a constant potential of +2.4 V. The vial was refilled with HFIP (1.5 mL) 5 min after the

## SUPPORTING INFORMATION

electrolysis was started. After full conversion was observed, the reaction mixture was concentrated *in vacuo* and the remaining residue was adsorbed on silica gel. The desired products **2** were purified by column chromatography.

### General procedure GP2-B (Conditions B):

In a 10 mL ElectraSyn vial cyclopropane **1** (150  $\mu\text{mol}$ , 1.00 eq.), DDQ (150  $\mu\text{mol}$ , 1.0 eq.) or CoTPP (3.75  $\mu\text{mol}$ , 2.5 mol%) and TBABF<sub>4</sub> (0.02 M) were dissolved in MeCN (6 mL) and the solution was saturated with oxygen for 5 minutes. The solution was electrolyzed at a glassy carbon anode and a glassy carbon cathode at a constant potential of +1.3 V (for DDQ) or +2.0 V (for CoTPP). After full conversion was observed, the reaction mixture was concentrated *in vacuo* and the remaining residue was adsorbed on silica gel. The desired products **2** were purified by column chromatograph.

### General procedure GP2-C (Conditions C):

In a 5 mL ElectraSyn vial cyclopropane **1** (150  $\mu\text{mol}$ , 1.00 eq.), DDQ (150  $\mu\text{mol}$ , 1.00 eq.) and TBABF<sub>4</sub> (0.02 M) were dissolved in HFIP (3 mL) and the solution was saturated with oxygen for 5 minutes. The solution was electrolyzed at a glassy carbon anode and a glassy carbon cathode at a constant potential of +1.3 V. The vial was refilled with HFIP (1.5 mL) 5 min after the electrolysis was started. After full conversion was observed, the reaction mixture was concentrated *in vacuo* and the remaining residue was adsorbed on silica gel. The desired products **2** were purified by column chromatograph.

### General procedure (GP3) for the electrochemical conversion of D–A cyclobutanes (D–A CBs) to dioxanes

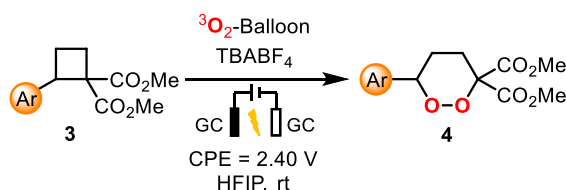

### General procedure GP3:

In a 5 mL ElectraSyn vial cyclobutane **3** (100  $\mu\text{mol}$ , 1.00 eq.) and TBABF<sub>4</sub> (0.02 M) were dissolved in HFIP (3 mL) and the solution was saturated with oxygen for 5 minutes. The solution was electrolyzed at a glassy carbon anode and a glassy cathode at a constant

## SUPPORTING INFORMATION

potential of +2.4 V. The vial was refilled with HFIP (1.5 mL) 5 min after the electrolysis was started. After full conversion was observed, the reaction mixture was concentrated *in vacuo* and the remaining residue was adsorbed on silica gel. The desired products **4** were purified by column chromatography using pentane/ethyl acetate mixtures.

**General procedure (GP4) for the conversion of dioxanes to  $\gamma$ -hydroxy ketones**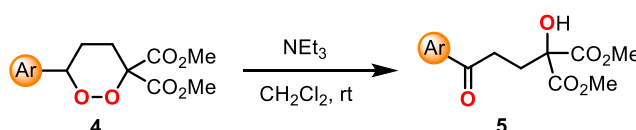**General procedure GP4:**

To a solution of dioxane **4** (1.00 eq.) in CH<sub>2</sub>Cl<sub>2</sub> (1 mL per 25  $\mu$ mol) was added NEt<sub>3</sub> (1.20 eq.) at room temperature and the resulting mixture was stirred until full conversion was observed. The reaction mixture was concentrated *in vacuo* and the remaining residue was adsorbed on silica gel. The desired products **5** were purified by column chromatography using pentane/ethyl acetate mixtures.

### 3. Synthesis of Starting Materials

#### 3.1 Synthesis of D–A cyclopropanes

All non-deuterated D–A CPs **1a** – **1p** were prepared following literature procedures.<sup>[2,3]</sup> The analytical data were in accordance with those reported in the literature.<sup>[4]</sup>

#### 3.2 Synthesis of deuterated D–A cyclopropanes

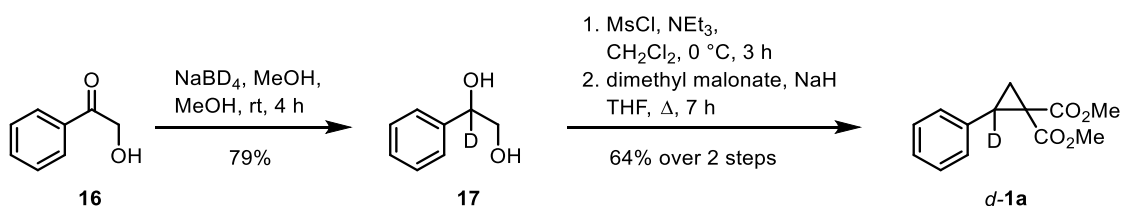

**Scheme S1.** Synthesis of deuterated D–A CP **d-1a**.

#### 1-Phenylethane-1-*d*-1,2-diol (**17**)

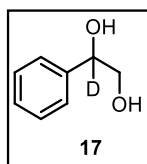

Diol **17** was prepared following a literature procedure.<sup>[5]</sup> NaBD<sub>4</sub> (169 mg, 4.04 mmol, 1.10 eq.) was added to a solution of ketone **16** (500 mg, 3.67 mmol, 1.0 eq.) in MeOH (20 mL) at 0 °C and the resulting mixture was stirred at rt for 4 h. The reaction was stopped by the addition of H<sub>2</sub>O and EtOAc and the phases were separated. The aq. phase was extracted with EtOAc (2 × 20 mL) and the combined organic layers were dried over anhydrous Na<sub>2</sub>SO<sub>4</sub>. Removal of the solvents *in vacuo* afforded diol **17** (405 mg, 2.91 mmol, 79%) as a colourless solid.

**<sup>1</sup>H-NMR** (400 MHz, CDCl<sub>3</sub>): δ = 7.39 – 7.28 (m, 5H), 3.76 (d, *J* = 11.3 Hz, 1H), 3.66 (d, *J* = 11.3 Hz, 1H), 2.32 (br, 2H).

**<sup>13</sup>C-NMR** (101 MHz, CDCl<sub>3</sub>): δ = 140.6, 128.7 (2C), 128.2, 126.2 (2C), 74.4 (t, *J* = 22.2 Hz, 1C), 68.1.

**IR** (ATR):  $\tilde{\nu}$  (cm<sup>-1</sup>) = 3337 (br, s), 3029 (w), 2026 (w), 2869 (w), 1493 (w), 1448 (m), 1393 (m), 1126 (m), 993 (s), 698 (s).

**HRMS** (ESI): C<sub>8</sub>H<sub>9</sub>DO<sub>2</sub> (139.07) calculated: 162.06358, found: 162.06368, [M+Na]<sup>+</sup>.

## SUPPORTING INFORMATION

m. p.: 66 °C.

**Dimethyl 2-phenylcyclopropane-1,1-dicarboxylate-2-*d* (*d*-1a)**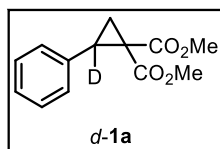

Deuterated CP *d*-1a was prepared following a literature procedure.<sup>[6]</sup> NEt<sub>3</sub> (790 mg, 1.08 mL, 7.80 mmol, 3.0 eq.) was added dropwise to a solution of diol **17** (362 mg, 3.67 mmol, 1.0 eq.) in CH<sub>2</sub>Cl<sub>2</sub> (5 mL) at rt and the reaction mixture was cooled to 0 °C. A solution of MsCl (745 mg, 503 μL, 6.05 mmol, 2.50 eq.) in CH<sub>2</sub>Cl<sub>2</sub> (5 mL) was added over the course of 90 min and the mixture was stirred for further 3 h at 0 °C. The reaction was stopped by the addition of aq. HCl (2 M) solution and the phases were separated. The aq. phase was extracted with CH<sub>2</sub>Cl<sub>2</sub> (3 × 10 mL), the combined organic layers were washed with aq. HCl (2 M, 15 mL) solution, aq. sat. NaHCO<sub>3</sub> solution (15 mL) and aq. sat. NaCl solution (15 mL) and dried over anhydrous Na<sub>2</sub>SO<sub>4</sub>. Removal of the solvents *in vacuo* and subsequent column chromatography (SiO<sub>2</sub>, PE/EtoAc 2:1) afforded the dimesylated compound with minor impurities. The white solid was used in the next step without further purification.

To a suspension of NaH (60% in mineral oil, 148 mg, 3.71 mmol, 2.10 eq.) in THF (30 mL) was added dimethyl malonate (490 mg, 426 μL, 3.71 mmol, 2.10 eq.) and the resulting mixture was stirred for 20 min at 0 °C. At 0 °C a solution of the dimesylate (521 mg 1.76 mmol, 1.0 eq.) in THF (10 mL) was added before the reaction mixture was refluxed at 85 °C for 17 h. After cooling to rt the reaction was stopped by the addition of H<sub>2</sub>O and EtOAc and the phases were separated. The aq. phase was extracted with EtOAc (3 × 25 mL), the combined organic layers were washed with aq. NaOH (1 M, 25 mL) solution, H<sub>2</sub>O (25 ml) and aq. sat. NaCl solution (25 mL) and dried over anhydrous Na<sub>2</sub>SO<sub>4</sub>. Removal of the solvents *in vacuo* and subsequent column chromatography (SiO<sub>2</sub>, PE/EtoAc 15:1 → 10:1) afforded the desired compound *d*-1a (264 mg, 1.12 mmol, 64% over 2 steps) as a pale yellow solid.

<sup>1</sup>H-NMR (400 MHz, CDCl<sub>3</sub>): δ = 7.30 – 7.18 (m, 5H), 3.80 (s, 3H), 3.37 (s, 3H), 2.20 (d, *J* = 11.3 Hz, 1H), 1.75 (d, *J* = 11.3 Hz, 1H).



## SUPPORTING INFORMATION

**$^{13}\text{C-NMR}$**  (101 MHz,  $\text{CDCl}_3$ ):  $\delta = 170.4, 170.2, 134.7, 128.6$  (2C),  $128.6$  (2C),  $127.5, 52.9, 52.3, 37.3, 32.4$  (t,  $J = 22.2$  Hz, 1C),  $19.2$ .

**IR** (ATR):  $\tilde{\nu}$  ( $\text{cm}^{-1}$ ) =  $2323$  (s),  $1730$  (s),  $1499$  (w),  $1438$  (m),  $1330$  (m),  $1271$  (s),  $1197$  (w),  $1175$  (w),  $1072$  (m),  $904$  (w),  $786$  (w).

**HRMS** (ESI):  $\text{C}_{13}\text{H}_{13}\text{DO}_4$  (235.09) calculated: 258.08471, found: 258.08464,  $[\text{M}+\text{Na}]^+$ .

**m. p.**:  $44$  °C.

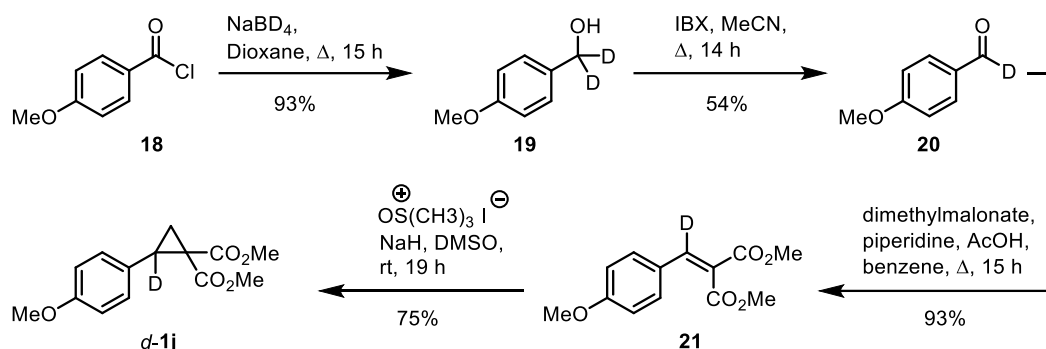

**Scheme S2.** Synthesis of deuterated D–A CP *d*-1j.

#### (4-Methoxyphenyl)methan-*d*<sub>2</sub>-ol (**19**)

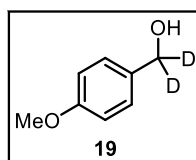

Deuterated alcohol **19** was prepared following a literature procedure.<sup>[7]</sup> To a solution of acyl chloride **18** (1.00 g, 5.86 mmol, 1.0 eq.) in dioxane (20 mL) was added  $\text{NaBD}_4$  (368 mg, 8.79 mmol, 1.5 eq.) and the reaction mixture was refluxed at  $105$  °C for 15 h. The reaction was stopped by the addition of  $\text{H}_2\text{O}$  and EtOAc at rt and the phases were separated. The aq. phase was extracted with EtOAc ( $3 \times 20$  mL) and the combined organic layers were dried over anhydrous  $\text{Na}_2\text{SO}_4$ . Removal of the solvents *in vacuo* and subsequent column chromatography ( $\text{SiO}_2$ , PE/EtOAc 5:1) afforded deuterated alcohol **19** (766 mg, 5.46 mmol, 93%) as a colourless liquid.

**$^1\text{H-NMR}$**  (400 MHz,  $\text{CDCl}_3$ ):  $\delta = 7.32 - 7.27$  (m, 2H),  $6.92 - 6.87$  (m, 2H),  $3.81$  (s, 3H),  $1.58$  (br, s, 1H).

*The analytical data were in accordance with those reported in the literature.*<sup>[7]</sup>

**Methoxybenzaldehyde-1-*d* (20)**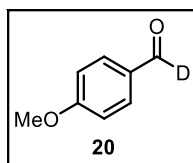

IBX (4.55 g, 16.3 mmol, 3.0 eq.) was added at rt to a solution of alcohol **19** (760 mg, 5.42 mmol, 1.0 eq.) in MeCN (30 mL) and the resulting mixture was refluxed for 14 h at 85 °C. After cooling to rt, the suspension was filtered through a celite pad which was washed multiple times with EtOAc. Removal of the solvents *in vacuo* and subsequent column chromatography (SiO<sub>2</sub>, PE/EtoAc 20:1) afforded deuterated aldehyde **20** (400 mg, 2.92 mmol, 54%) as a yellow liquid.

**<sup>1</sup>H-NMR** (400 MHz, CDCl<sub>3</sub>): δ = 7.87 – 7.82 (m, 2H), 7.03 – 6.98 (m, 2H), 3.89 (s, 3H).

*Deuterated aldehyde 20 is commercially available from a variety of suppliers (CAS: 19486-71-6).*

**Dimethyl 2-((4-methoxyphenyl)methylene-*d*)malonate (21)**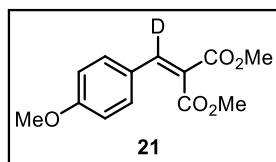

Deuterated CP **21** was prepared following a literature procedure.<sup>[3]</sup> A solution of compound **20** (400 mg, 2.92 mmol, 1.0 eq.), dimethyl malonate (463 mg, 403 μL, 3.50 mmol, 1.20 eq.), piperidine (25 mg, 30 μL, 292 μmol, 10 mol%) and conc. AcOH (17.5 mg, 16.7 μL, 292 μmol, 10 mol%) in benzene (15 mL) was refluxed at 115 °C for 15 h using a Dean-Stark apparatus. After cooling to rt, the solvents were removed *in vacuo* and the desired product **21** was purified by column chromatography (SiO<sub>2</sub>, PE/EtoAc 20:1→10:1). Malonate **21** (684 mg, 2.73 mmol, 93%) was obtained as a colourless liquid.

**<sup>1</sup>H-NMR** (600 MHz, CDCl<sub>3</sub>): δ = 7.40 – 7.37 (m, 2H), 6.90 – 6.88 (m, 2H), 3.86 (s, 3H), 3.83 (s, 3H), 3.83 (s, 3H).

**<sup>13</sup>C-NMR** (151 MHz, CDCl<sub>3</sub>): δ = 167.8, 164.9, 161.9, 142.4 (t, *J* = 23.9 Hz, 1C), 131.7 (2C), 125.3, 122.77, 114.53 (C2), 55.5, 52.7, 52.6.

## SUPPORTING INFORMATION

**IR** (ATR):  $\tilde{\nu}$  (cm<sup>-1</sup>) = 1717 (m), 1599 (m), 1511 (w), 1436 (w), 1312 (m), 1256 (s), 1209 (s), 1170 (s), 1091 (s), 1025 (w).

**HRMS** (ESI): C<sub>13</sub>H<sub>13</sub>DO<sub>5</sub> (251.09) calculated: 252.09768, found: 274.09777, [M+H]<sup>+</sup>.

**Dimethyl 2-(4-methoxyphenyl)cyclopropane-1,1-dicarboxylate-2-*d* (*d*-1j)**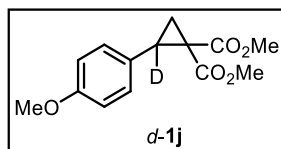

Deuterated CP *d*-1j was prepared following a literature procedure.<sup>[3]</sup> A solution of compound **21** (660 mg, 2.63 mmol, 1.0 eq.) in DMSO (4 mL) was added to a suspension of NaH (60% in mineral oil, 121 mg, 3.02 mmol, 1.15 eq.) and trimethylsulfoxonium iodide (637 mg, 2.89 mmol, 1.10 eq.) in DMSO (4 mL) and the reaction mixture was stirred for 19 h at rt. The reaction was stopped by the addition of H<sub>2</sub>O and EtOAc and the phases were separated. The aq. phase was extracted with EtOAc (3 × 20 mL), the combined organic layers were washed with H<sub>2</sub>O (3 × 30 mL) and were dried over anhydrous Na<sub>2</sub>SO<sub>4</sub>. Removal of the solvents *in vacuo* and subsequent column chromatography (SiO<sub>2</sub>, PE/EtOAc 5:1) afforded cyclopropane *d*-1j (526 mg, 1.97 mmol, 75%) as a colourless oil.

**<sup>1</sup>H-NMR** (500 MHz, CDCl<sub>3</sub>):  $\delta$  = 7.12 – 7.09 (m, 2H), 6.81 – 6.78 (m, 2H), 3.78 (s, 3H), 3.77 (s, 3H), 3.38 (s, 3H), 2.15 (d, *J* = 2.15 Hz, 1H), 1.71 (d, *J* = 2.15 Hz, 1H).

**<sup>13</sup>C-NMR** (126 MHz, CDCl<sub>3</sub>):  $\delta$  = 170.5, 167.3, 159.1, 129.7 (2C), 126.5, 113.7 (2C), 55.3, 52.9, 52.4, 37.2, 32.1 (t, *J* = 22.2 Hz, 1C), 19.3.

**IR** (ATR):  $\tilde{\nu}$  (cm<sup>-1</sup>) = 1725 (s), 1613 (w), 1515 (m), 1439 (m), 1340 (m), 1252 (s), 1181 (s), 1118 (s), 1072 (w), 1031 (m).

**HRMS** (ESI): C<sub>14</sub>H<sub>15</sub>DO<sub>5</sub> (265.10) calculated: 266.11333, found: 266.11338, [M+H]<sup>+</sup>.

## SUPPORTING INFORMATION

**3.3 Synthesis of D-A cyclobutanes**

Non-deuterated D–A CBs **3a**, **3d**, **3e** and **3g** were prepared following a literature procedure.<sup>[1]</sup> The analytical data were in accordance with those reported in the literature.<sup>[1,8]</sup>

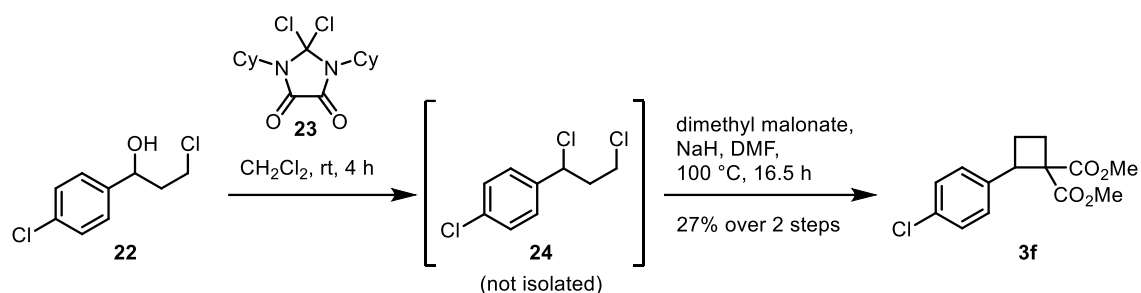

**Scheme S3.** Synthesis of D–A CB **4f**.

**Dimethyl 2-(4-chlorophenyl)cyclobutane-1,1-dicarboxylate (3f)**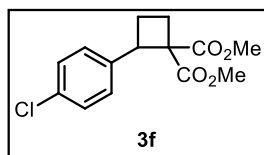

To a solution of alcohol **22** (1.78 g, 8.72 mmol, 1.0 eq.) in  $\text{CH}_2\text{Cl}_2$  (20 mL) was added chlorinating agent **23** (3.47 g, 10.5 mmol, 1.20 eq.) and the reaction mixture was stirred for 4 h at rt. After removal of the solvents *in vacuo* dichloride **24** was obtained and was used without further purification in the next step.

Previously obtained material **24** (1.95 g, 8.72 mmol, 1.0 eq.), dimethyl malonate (1.15 g, 1.00 mL, 9.59 mmol, 1.10 eq.) and NaH (60% in mineral oil, 733 mg, 18.3 mmol, 2.10 eq., 2 portions) were reacted according to **GP1**. Column chromatography ( $\text{SiO}_2$ , PE/EtOAc 100:1  $\rightarrow$  50:1) afforded cyclobutane **3f** (645 mg, 2.28 mmol, 27% over 2 steps) as a pale yellow oil.

**$^1\text{H-NMR}$**  (400 MHz,  $\text{CDCl}_3$ ):  $\delta$  = 7.27– 7.21 (m, 4H), 4.32 (t,  $J$  = 9.7 Hz, 1H), 3.78 (s, 3H), 3.29 (s, 3H), 2.71 – 2.66 (m, 1H), 2.61 – 2.53 (m, 1H), 2.31 – 2.25 (m, 1H), 2.20 – 2.14 (m, 1H).

**$^{13}\text{C-NMR}$**  (101 MHz,  $\text{CDCl}_3$ ):  $\delta$  = 172.2, 169.8, 137.7, 132.9, 129.1 (2C), 128.3 (2C), 59.7, 52.8, 52.2, 44.6, 25.8, 20.9.

## SUPPORTING INFORMATION

**IR** (ATR):  $\tilde{\nu}$  (cm<sup>-1</sup>) = 2954 (w), 1731 (s), 1491 (w), 1438 (m), 1271 (s), 1199 (s), 1104 (s), 1034 (w), 833 (m), 729 (m).

**HRMS** (ESI): C<sub>14</sub>H<sub>15</sub>ClO<sub>4</sub> (282.06) calculated: 321.09204, found: 321.09214, [M+K]<sup>+</sup>.

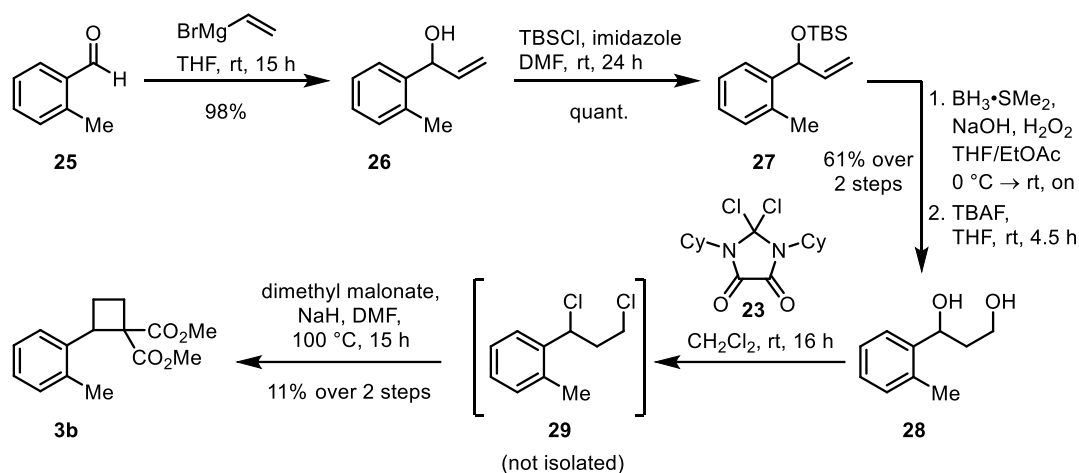

**Scheme S4.** Synthesis of deuterated D–A CB **3b**.

### 1-(*o*-Tolyl)prop-2-en-1-ol (**26**)

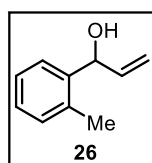

Alcohol **26** was prepared following a literature procedure.<sup>[9]</sup> To a solution of aldehyde **25** (2.00 g, 16.6 mmol, 1.0 eq.) in THF (25 mL) was added vinylmagnesium bromide (1 M in THF, 20 mL, 19.9 mmol, 1.20 eq.) at 0 °C and the reaction mixture was stirred for 15 h at rt. The reaction was stopped by the addition of aq. sat. NH<sub>4</sub>Cl solution and EtOAc and the phases were separated. The aq. phase was extracted with EtOAc (3 × 30 mL), the combined organic layers were washed with aq. sat. NaCl solution (50 mL) and were dried over anhydrous Na<sub>2</sub>SO<sub>4</sub>. Removal of the solvents *in vacuo* afforded the desired compound **26** (2.43 g, 16.3 mmol, 98%) as a yellow liquid.

**<sup>1</sup>H-NMR** (400 MHz, CDCl<sub>3</sub>):  $\delta$  = 7.47 – 7.44 (m, 1H), 7.25 – 7.13 (m, 3H), 6.04 (ddd,  $J$  = 17.2, 10.3, 5.7 Hz, 1H), 5.43 (dt,  $J$  = 5.7, 1.4 Hz, 1H), 5.32 (dt,  $J$  = 17.2, 1.4 Hz, 1H), 5.21 (dt,  $J$  = 10.3, 1.4 Hz, 1H), 2.37 (s, 3H), 1.74 (br, s, 1H).

*The analytical data were in accordance with those reported in the literature.*<sup>[9]</sup>

## SUPPORTING INFORMATION

***tert*-Butyldimethyl((1-(*o*-tolyl)allyl)oxy)silane (27)**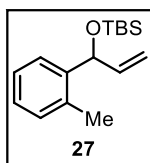

TBSCl (2.03 g, 13.5 mmol, 1.50 eq.) was added to a solution of alcohol **26** (1.33 g, 9.00 mmol, 1.0 eq.) and imidazole (1.23 g, 18 mmol, 2.0 eq.) in DMF (6 mL) and the reaction mixture was stirred for 24 h at rt. The reaction was stopped by the addition of H<sub>2</sub>O and EtOAc and the phases were separated. The aq. phase was extracted with EtOAc (3 × 10 mL) and the combined organic layers were dried over anhydrous Na<sub>2</sub>SO<sub>4</sub>. Removal of the solvents *in vacuo* and subsequent column chromatography (SiO<sub>2</sub>, PE/EtOAc 20:1) afforded the desired compound **27** with minor impurities as a colourless liquid. **27** was used in the next step without further purification.

**1-(*o*-Tolyl)propane-1,3-diol (28)**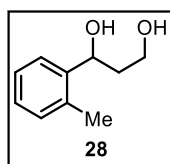

Alkene **27** was converted following a literature procedure.<sup>[10]</sup> To a solution of alkene **27** (500 mg, 1.90 mmol, 1.0 eq.) in THF (7 mL) was added BH•SMe<sub>2</sub> (2 M in THF, 1.05 mL, 2.09 mmol, 1.10 eq.) at 0 °C and the reaction mixture was stirred for 3.5 h at rt. EtOAc (20 mL), NaOH (4.5 mL) and H<sub>2</sub>O<sub>2</sub> (30%, 4.5 mL) were added dropwise at 0 °C and mixture was stirred for another 21 h at rt. The reaction was stopped by the addition of H<sub>2</sub>O and the phases were separated. The aq. phase was extracted with EtOAc (3 × 15 mL) and the combined organic layers were dried over anhydrous Na<sub>2</sub>SO<sub>4</sub>. Removal of the solvents *in vacuo* and purification by column chromatography (SiO<sub>2</sub>, PE/EtOAc 10:1 → 2:1) afforded the desired compound with minor impurities as a colourless liquid. The obtained material was used in the next step without further purification.

TBAF (1 M in THF, 4.45 mL, 4.45 mmol) was added to a solution of the obtained product from the hydroboration (1.36 g, 4.99 mmol, 1.0 eq.) in THF (15 mL) and the reaction mixture was stirred for 4.5 h at rt. Removal of the solvents *in vacuo* and purification by column chromatography (SiO<sub>2</sub>, PE/EtOAc 2:1 → 1:2) afforded the desired compound **28** (505 mg, 3.04 mmol, 61% over 3 steps) as a white solid.

## SUPPORTING INFORMATION

**<sup>1</sup>H-NMR** (400 MHz, CDCl<sub>3</sub>): δ = 7.55 – 7.51 (m, 1H), 7.28 – 7.12 (m, 3H), 5.21 (dd, *J* = 8.2, 4.0 Hz, 1H), 3.90 (t, *J* = 5.4 Hz, 1H), 2.48 (br, s, 2H), 2.33 (s, 3H), 2.02 – 1.85 (m, 2H).

The analytical data were in accordance with those reported in the literature.<sup>[11]</sup>

**Dimethyl 2-(*o*-tolyl)cyclobutane-1,1-dicarboxylate (3b)**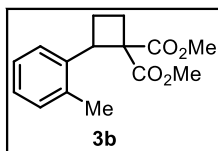

To a solution of diol **28** (498 mg, 3.00 mmol, 1.0 eq.) in CH<sub>2</sub>Cl<sub>2</sub> (10 mL) was added chlorinating agent **23** (2.49 g, 7.49 mmol, 2.50 eq.) and the reaction mixture was stirred for 16 h at rt. After removal of the solvents *in vacuo* dichloride **29** was obtained and was used without further purification in the next step.

Previously obtained material **29** (606 mg, 3.00 mmol, 1.0 eq.), dimethyl malonate (436 mg, 380 μL, 3.30 mmol, 1.10 eq.) and NaH (60% in mineral oil, 252 mg, 6.30 mmol, 2.10 eq., 2 portions) were reacted according to **GP1**. Column chromatography (SiO<sub>2</sub>, PE/EtOAc 100:1 → 50:1) afforded cyclobutane **3b** (89 mg, 340 μmol, 11% over 2 steps) as a colourless oil.

**<sup>1</sup>H-NMR** (400 MHz, CDCl<sub>3</sub>): δ = 7.28 – 7.25 (br, m, 1H), 7.17 – 7.09 (m, 3H), 4.68 – 4.62 (m, 1H), 3.75 (s, 3H), 3.18 (s, 3H), 2.92 – 2.83 (m, 1H), 2.59 – 2.50 (m, 1H), 2.39 (s, 3H), 2.30 – 2.21 (m, 2H).

**<sup>13</sup>C-NMR** (101 MHz, CDCl<sub>3</sub>): δ = 172.2, 169.8, 137.7, 137.6, 130.3, 127.1, 126.5, 125.8, 59.6, 52.7, 51.9, 41.2, 25.8, 21.6, 20.2.

**IR** (ATR):  $\tilde{\nu}$  (cm<sup>-1</sup>) = 2996 (w), 2952 (w), 1727 (s), 1491 (w), 1434 (m), 1263 (s), 1198 (s), 1179 (m), 1101 (s), 747 (m).

**HRMS** (ESI): C<sub>15</sub>H<sub>18</sub>O<sub>4</sub> (262.12) calculated: 301.08367, found: 301.08369, [M+K]<sup>+</sup>.

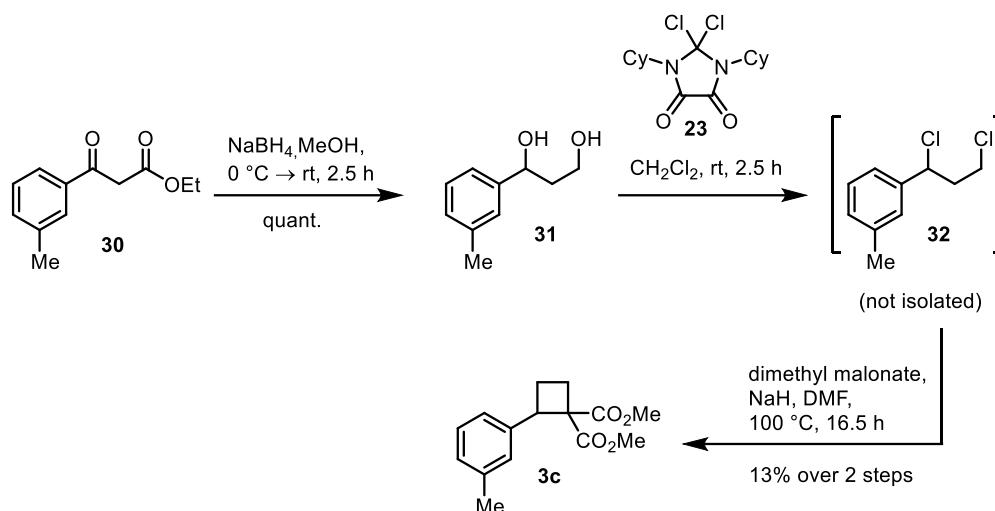

**Scheme S3.** Synthesis of D–A CB **3c**.

### 1-(*m*-Tolyl)propane-1,3-diol (**31**)

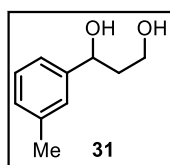

Diol **31** was prepared following a literature procedure.<sup>[12]</sup> NaBH<sub>4</sub> (523 mg, 13.8 mmol, 3.0 eq.) was added at 0 °C to a solution of compound **30** (1.00 g, 4.85 mmol, 1.0 eq.) in MeOH (10 mL) and the reaction mixture was stirred for 2.5 h at rt. The reaction was stopped by the addition of H<sub>2</sub>O and EtOAc and the phases were separated. The aq. phase was extracted with EtOAc (3 × 15 mL) and the combined organic layers were dried over anhydrous Na<sub>2</sub>SO<sub>4</sub>. Removal of the solvents *in vacuo* and purification by column chromatography (SiO<sub>2</sub>, PE/EtOAc 3:1 → 2:1) afforded the desired compound **31** (806 mg, 4.85 mmol, quant.) as a colourless oil.

**<sup>1</sup>H-NMR** (400 MHz, CDCl<sub>3</sub>): δ = 7.27 – 7.07 (m, 4H), 4.93 (dd, *J* = 8.6, 3.9 Hz, 1H), 3.86 (t, *J* = 5.5, Hz, 1H), 2.54 (br, s, 2H), 2.36 (s, 3H), 2.08 – 1.87 (m, 2H).

*The analytical data were in accordance with those reported in the literature.*<sup>[11]</sup>



**Dimethyl 2-(*m*-tolyl)cyclobutane-1,1-dicarboxylate (**3c**)**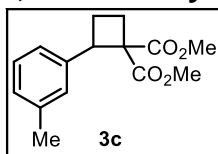

To a solution of diol **31** (798 mg, 4.80 mmol, 1.0 eq.) in CH<sub>2</sub>Cl<sub>2</sub> (15 mL) was added chlorinating agent **23** (3.75 g, 11.3 mmol, 2.50 eq.) and the reaction mixture was stirred for 2.5 h at rt. After removal of the solvents *in vacuo* dichloride **32** was obtained and was used without further purification in the next step.

Previously obtained material **32** (975 mg, 3.80 mmol, 1.0 eq.), dimethyl malonate (698 mg, 607  $\mu$ L, 5.28 mmol, 1.10 eq.) and NaH (60% in mineral oil, 404 mg, 10.1 mmol, 2.10 eq., 2 portions) were reacted according to **GP1**. Column chromatography (SiO<sub>2</sub>, PE/EtOAc 100:1  $\rightarrow$  50:1) afforded cyclobutane **3c** (148 mg, 640  $\mu$ mol, 13% over 2 steps) as a colourless oil.

**<sup>1</sup>H-NMR** (400 MHz, CDCl<sub>3</sub>):  $\delta$  = 7.19 – 7.15 (m, 1H), 7.09 – 7.01 (m, 3H), 4.33 (t,  $J$  = 9.5 Hz, 1H), 3.77 (s, 3H), 3.26 (s, 3H), 2.74 – 2.55 (m, 2H), 2.32 (s, 3H), 2.28 – 2.12 (m, 2H).

**<sup>13</sup>C-NMR** (101 MHz, CDCl<sub>3</sub>):  $\delta$  = 172.3, 169.9, 139.2, 137.7, 128.5, 128.1, 127.8, 124.7, 59.8, 52.6, 52.0, 45.2, 25.9, 21.6, 21.0.

**IR** (ATR):  $\tilde{\nu}$  (cm<sup>-1</sup>) = 2996 (w), 2951 (w), 1726 (s), 1489 (w), 1435 (m), 1266 (s), 1197 (s), 1104 (s), 1039 (w), 700 (m).

**HRMS** (ESI): C<sub>15</sub>H<sub>18</sub>O<sub>4</sub> (262.12) calculated: 301.08367, found: 301.08372, [M+K]<sup>+</sup>.

**2,2-Dichloro-1,3-dicyclohexylimidazolidine-4,5-dione (**23**)**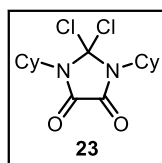

Chlorinating agent **23** was prepared following a literature procedure.<sup>[13]</sup> Oxyalyl chloride (14.0 g, 9.43 mL, 105 mmol, 1.05 eq.) was added to a solution of DCC (20.6 g, 100 mmol, 1.0 eq.) in CH<sub>2</sub>Cl<sub>2</sub> (200 mL) dropwise over 25 min at 0 °C and the reaction mixture was stirred for 3.5 h at rt. After the solvent was removed *in vacuo*, the remaining solid was washed with petrol ether (5 x 100 mL) and dried *in vacuo*. The obtained chlorinating agent **23** (40.1 g, 120 mmol, 94%) was used without further purification.

3.4 Synthesis of deuterated D-A cyclobutane *d*-3a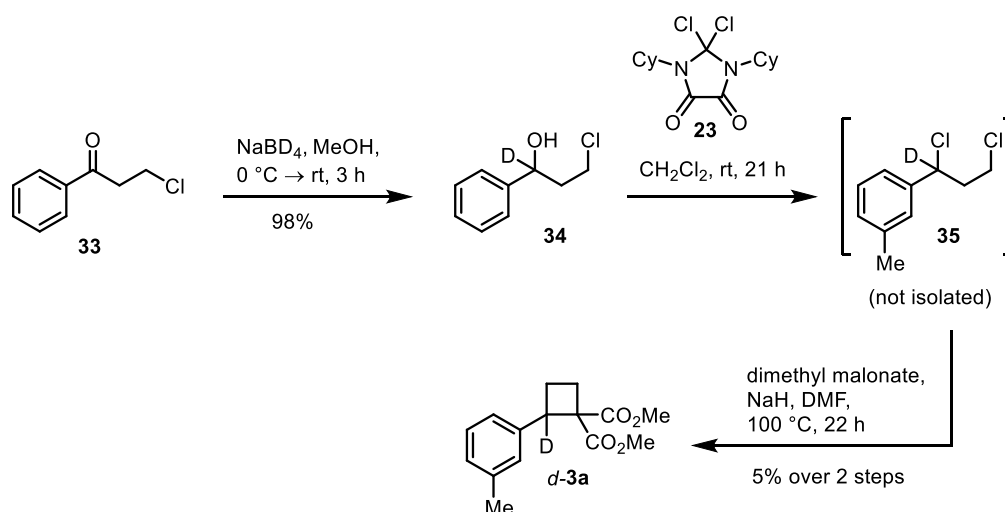Scheme S4. Synthesis of deuterated D-A *d*-3a.3-Chloro-1-phenylpropan-1-*d*-1-ol (**34**)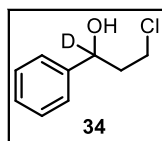

Alcohol **34** was prepared following a literature procedure.<sup>[14]</sup>  $\text{NaBD}_4$  (203 mg, 4.89 mmol, 1.10 eq.) was added at  $0\text{ }^\circ\text{C}$  to a solution of compound **33** (1.00 g, 4.85 mmol, 1.0 eq.) in MeOH (20 mL) and the reaction mixture was stirred for 3 h at rt. The reaction was stopped by the addition of  $\text{H}_2\text{O}$  and EtOAc and the phases were separated. The aq. phase was extracted with EtOAc ( $2 \times 15\text{ mL}$ ) and the combined organic layers were dried over anhydrous  $\text{Na}_2\text{SO}_4$ . Removal of the solvents *in vacuo* and purification by column chromatography ( $\text{SiO}_2$ , PE/EtOAc 10:1) afforded the desired compound **34** (783 mg, 4.56 mmol, 98%) as a yellow liquid.

**$^1\text{H-NMR}$**  (400 MHz,  $\text{CDCl}_3$ ):  $\delta = 7.39 - 7.28$  (m, 5H), 3.75 (ddd,  $J = 10.9, 8.2, 5.6\text{ Hz}$ , 1H), 3.57 (ddd,  $J = 10.9, 5.9\text{ Hz}$ , 1H), 2.29 – 2.21 (m, 1H), 2.13 – 2.06 (m, 1H), 1.80 (br, s, 1H).

**$^{13}\text{C-NMR}$**  (101 MHz,  $\text{CDCl}_3$ ):  $\delta = 143.8, 128.8$  (2C), 128.1, 125.9 (2C), 71.1 (t,  $J = 22.2\text{ Hz}$ , 1C), 41.8, 41.5.

**IR** (ATR):  $\tilde{\nu}$  ( $\text{cm}^{-1}$ ) = 3365 (br), 3028 (w), 2963 (w), 1493 (w), 1447 (m), 1299 (m), 1197 (s), 1174 (w), 1073 (s), 768 (s).

## SUPPORTING INFORMATION

**HRMS** (GC/EI): C<sub>9</sub>H<sub>10</sub>DCIO (171.05) calculated: 171.05612, found: 171.05745, [M+H]<sup>+</sup>.

**Dimethyl 2-phenylcyclobutane-1,1-dicarboxylate-2-*d* (*d*-**3a**)**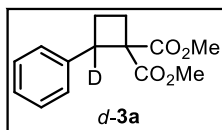

To a solution of diol **34** (760 mg, 4.42 mmol, 1.0 eq.) in CH<sub>2</sub>Cl<sub>2</sub> (20 mL) was added chlorinating agent **23** (2.51 g, 7.51 mmol, 1.70 eq.) and the reaction mixture was stirred for 21 h at rt. After removal of the solvents *in vacuo* dichloride **35** was obtained and was used without further purification in the next step.

Previously obtained material **35** (840 mg, 4.42 mmol, 1.0 eq.), dimethyl malonate (642 mg, 558 μL, 4.86 mmol, 1.10 eq.) and NaH (60% in mineral oil, 371 mg, 9.28 mmol, 2.10 eq., 2 portions) were reacted according to **GP1**. Column chromatography (SiO<sub>2</sub>, PE/EtOAc 100:1 → 50:1) afforded cyclobutane *d*-**3a** (53.0 mg, 213 μmol, 5% over 2 steps) as a colourless oil.

**<sup>1</sup>H-NMR** (400 MHz, CDCl<sub>3</sub>): δ = 7.39 – 7.27 (m, 4H), 7.26 – 7.18 (m, 1H), 3.78 (s, 3H), 3.24 (s, 3H), 2.75 – 2.68 (m, 1H), 2.66 – 2.56 (m, 1H), 2.32 – 2.23 (m, 1H), 2.21 – 2.13 (m, 1H).

**<sup>13</sup>C-NMR** (101 MHz, CDCl<sub>3</sub>): δ = 172.2, 169.9, 139.2, 128.2 (2C), 127.7 (2C), 127.1, 59.8, 52.6, 52.0, 44.9 (t, *J* = 21.2 Hz, 1C, 25.8, 20.7).

**IR** (ATR):  $\tilde{\nu}$  (cm<sup>-1</sup>) = 2997 (w), 2952 (w), 1727 (s), 1495 (w), 1438 (m), 1263 (s), 1195 (m), 1108 (s), 1032 (w), 697 (m).

**HRMS** (ESI): C<sub>14</sub>H<sub>15</sub>DO<sub>4</sub> (249.11) calculated: 272.10036, found: 272.10051, [M+Na]<sup>+</sup>.

#### 4. Electrochemical Synthesis of $\beta$ -Hydroxy Ketones

##### Dimethyl 2-hydroxy-2-(2-oxo-2-phenylethyl)malonate (**2a**)

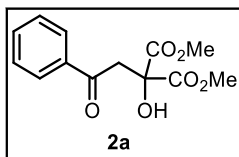

Cyclopropane **1a** (35.9 mg, 153  $\mu$ mol, 1.0 eq.) was reacted according to **GP2-A**. Column chromatography (SiO<sub>2</sub>, PE/EtOAc 4:1) afforded the desired product **2a** (36.0 mg, 135  $\mu$ mol, 88%) as a white solid.

**Scale-up reaction:** In a 20 mL ElectraSyn vial cyclopropane **1a** (722 mg, 3.08 mmol, 1.00 eq.) and TBABF<sub>4</sub> (0.02 M) were dissolved in HFIP (15 mL) and the solution was saturated with oxygen for 15 minutes. The solution was electrolyzed at a glassy carbon anode and a glassy cathode at a constant potential of +2.4 V for 22.5 h. The reaction mixture was concentrated *in vacuo* and the remaining residue was adsorbed on silica gel. Purification by column chromatography (SiO<sub>2</sub>, PE/EtOAc 4:1  $\rightarrow$  3:1) afforded the desired product **2a** (685 mg, 2.57 mmol, 83%) as a white solid.

**<sup>1</sup>H-NMR** (400 MHz, CDCl<sub>3</sub>):  $\delta$  = 7.98 – 7.94 (m, 2H), 7.62 – 7.58 (m, 1H), 7.50 – 7.45 (m, 2H), 4.30 (br, s, 1H), 3.86 (s, 2H), 3.85 (s, 6H).

**<sup>13</sup>C-NMR** (101 MHz, CDCl<sub>3</sub>):  $\delta$  = 196.5, 170.2 (2C), 136.3, 134.0, 128.9 (2C), 128.4 (2C), 77.0, 53.8 (2C), 43.9.

**IR** (ATR):  $\tilde{\nu}$  (cm<sup>-1</sup>) = 3453 (br), 2963 (w), 2929 (w), 1727 (s), 1675 (m), 1594 (w), 1439 (m), 1212 (s), 1141 (s), 1073 (m).

**HRMS** (ESI): C<sub>13</sub>H<sub>14</sub>O<sub>6</sub> (266.07) calcd.: 289.06826 found: 289.06839, [M+Na]<sup>+</sup>.

**m. p.:** 90 °C

**Dimethyl 2-hydroxy-2-(2-oxo-2-(*o*-tolyl)ethyl)malonate (2b)**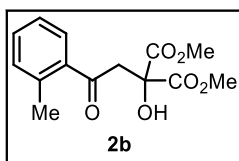

Cyclopropane **1b** (36.8 mg, 148  $\mu\text{mol}$ , 1.0 eq.) was reacted according to **GP2-A**. Column chromatography ( $\text{SiO}_2$ , PE/EtOAc 4:1) afforded the desired product **2b** (35.2 mg, 126  $\mu\text{mol}$ , 85%) as a colourless oil.

**$^1\text{H-NMR}$**  (400 MHz,  $\text{CDCl}_3$ ):  $\delta$  = 7.72 – 7.70 (m, 1H), 7.42 – 7.38 (m, 1H), 7.30 – 7.24 (m, 2H), 4.32 (br, s, 1H), 3.85 (s, 6H), 3.78 (s, 2H), 2.50 (s, 3H).

**$^{13}\text{C-NMR}$**  (101 MHz,  $\text{CDCl}_3$ ):  $\delta$  = 200.1, 170.3 (2C), 139.1, 136.7, 132.3, 132.2, 129.1, 126.0, 77.2, 53.8 (2C), 43.4, 21.6.

**IR** (ATR):  $\tilde{\nu}$  ( $\text{cm}^{-1}$ ) = 3484 (br), 2958 (w), 2851 (w), 1744 (s), 1688 (m), 1570 (w), 1441 (m), 1236 (s), 1135 (m), 1075 (w).

**HRMS** (ESI):  $\text{C}_{14}\text{H}_{16}\text{O}_6$  (280.09) calcd.: 281.10196 found: 281.10205,  $[\text{M}+\text{H}]^+$ .

**Dimethyl 2-hydroxy-2-(2-oxo-2-(*m*-tolyl)ethyl)malonate (2c)**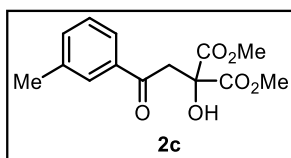

Cyclopropane **1c** (39.2 mg, 158  $\mu\text{mol}$ , 1.0 eq.) was reacted according to **GP2-A**. Column chromatography ( $\text{SiO}_2$ , PE/EtOAc 4:1) afforded the desired product **2c** (36.0 mg, 128  $\mu\text{mol}$ , 81%) as a colourless oil.

**$^1\text{H-NMR}$**  (400 MHz,  $\text{CDCl}_3$ ):  $\delta$  = 7.78 – 7.74 (m, 2H), 7.42 – 7.34 (m, 2H), 4.31 (br, s, 1H), 3.85 (s, 6H), 3.84 (s, 2H), 2.41 (s, 3H).

**$^{13}\text{C-NMR}$**  (101 MHz,  $\text{CDCl}_3$ ):  $\delta$  = 196.8, 170.3 (2C), 138.8, 136.3, 134.8, 128.9, 128.8, 125.6, 77.1, 53.8 (2C), 44.0, 21.5.

**IR** (ATR):  $\tilde{\nu}$  ( $\text{cm}^{-1}$ ) = 3488 (br), 2956 (w), 2851 (w), 1743 (s), 1685 (m), 1594 (w), 1438 (m), 1225 (s), 1137 (m), 1076 (w).

**HRMS** (ESI):  $\text{C}_{14}\text{H}_{16}\text{O}_6$  (280.09) calcd.: 303.08391 found: 303.08406,  $[\text{M}+\text{Na}]^+$ .

**Dimethyl 2-hydroxy-2-(2-oxo-2-(*p*-tolyl)ethyl)malonate (2d)**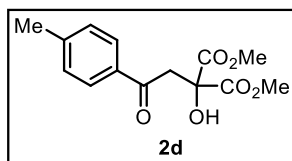

Cyclopropane **1d** (37.6 mg, 151  $\mu\text{mol}$ , 1.0 eq.) was reacted according to **GP2-A**. Column chromatography ( $\text{SiO}_2$ , PE/EtOAc 4:1) afforded the desired product **2d** (34.8 mg, 124  $\mu\text{mol}$ , 82%) as a colourless solid.

**$^1\text{H-NMR}$**  (400 MHz,  $\text{CDCl}_3$ ):  $\delta$  = 7.87 – 7.84 (m, 2H), 7.29 – 7.26 (m, 2H), 4.32 (br, s, 1H), 3.84 (s, 6H), 3.83 (s, 2H), 2.42 (s, 3H).

**$^{13}\text{C-NMR}$**  (101 MHz,  $\text{CDCl}_3$ ):  $\delta$  = 196.2, 170.3 (2C), 145.0, 133.8, 129.6 (2C), 128.5 (2C), 77.1, 53.8 (2C), 43.8, 21.9.

**IR** (ATR):  $\tilde{\nu}$  ( $\text{cm}^{-1}$ ) = 3483 (br), 2958 (w), 2849 (w), 1743 (s), 1684 (m), 1607 (w), 1438 (m), 1237 (s), 1139 (m), 1075 (w).

**HRMS** (ESI):  $\text{C}_{14}\text{H}_{16}\text{O}_6$  (280.09) calcd.: 303.08391 found: 303.08411,  $[\text{M}+\text{Na}]^+$ .

**m. p.**: 85  $^\circ\text{C}$

**Dimethyl 2-(2-(4-fluorophenyl)-2-oxoethyl)-2-hydroxymalonate (2e)**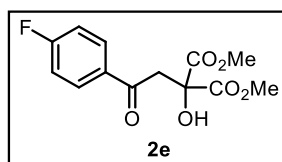

Cyclopropane **1e** (44.1 mg, 175  $\mu\text{mol}$ , 1.0 eq.) was reacted according to **GP2-A** (*note*: a constant current of  $I = 10$  mA was applied instead of a constant potential of  $U = 2.4$  V). Column chromatography ( $\text{SiO}_2$ , PE/EtOAc 4:1) afforded the desired product **2e** (39.9 mg, 141  $\mu\text{mol}$ , 80%) as a colourless solid.

**$^1\text{H-NMR}$**  (400 MHz,  $\text{CDCl}_3$ ):  $\delta$  = 8.02 – 7.96 (m, 2H), 7.18 – 7.12 (m, 2H), 3.85 (s, 6H), 3.82 (s, 2H).

No *OH*-signal was observed.

**$^{13}\text{C-NMR}$**  (101 MHz,  $\text{CDCl}_3$ ):  $\delta$  = 194.9, 170.2 (2C), 166.3 (d,  $J = 256.1$  Hz, 1C), 132.8 (d,  $J = 3.0$  Hz, 1C), 131.1 (d,  $J = 9.5$  Hz, 2C), 116.1 (d,  $J = 22.0$  Hz, 2C), 77.0, 53.8 (2C), 43.8.

## SUPPORTING INFORMATION

**<sup>19</sup>F-NMR** (377 MHz, CDCl<sub>3</sub>):  $\delta = -104.1$  (s, 1F).

**IR** (ATR):  $\tilde{\nu}$  (cm<sup>-1</sup>) = 3485 (br), 2957 (w), 2853 (w), 1742 (s), 1688 (m), 1597 (m), 1439 (m), 1229 (s), 1138 (m), 1076 (w).

**HRMS** (ESI): C<sub>13</sub>H<sub>13</sub>FO<sub>6</sub> (284.06) calcd.: 323.03277 found: 323.03292, [M+K]<sup>+</sup>.

**m. p.:** 92 °C

**Dimethyl 2-(2-(4-chlorophenyl)-2-oxoethyl)-2-hydroxymalonate (2f)**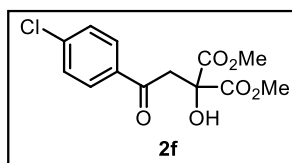

Cyclopropane **1f** (41.3 mg, 154  $\mu$ mol, 1.0 eq.) was reacted according to **GP2-A**. Column chromatography (SiO<sub>2</sub>, PE/EtOAc 4:1) afforded the desired product **2f** (39.8 mg, 132  $\mu$ mol, 86%) as a colourless solid.

**<sup>1</sup>H-NMR** (400 MHz, CDCl<sub>3</sub>):  $\delta = 7.92 - 7.88$  (m, 2H), 7.47 – 7.43 (m, 2H), 4.25 (br, s, 1H), 3.85 (s, 6H), 3.81 (s, 2H).

**<sup>13</sup>C-NMR** (101 MHz, CDCl<sub>3</sub>):  $\delta = 195.3$ , 170.1 (2C), 140.6, 134.7, 129.8 (2C), 129.2 (2C), 76.9, 53.9 (2C), 43.8.

**IR** (ATR):  $\tilde{\nu}$  (cm<sup>-1</sup>) = 3478 (br), 2958 (w), 2851 (w), 1745 (s), 1689 (m), 15788 (w), 1439 (m), 1238 (s), 1138 (m), 1086 (w).

**HRMS** (ESI): C<sub>13</sub>H<sub>13</sub>ClO<sub>6</sub> (300.04) calcd.: 339.00322 found: 339.00321, [M+K]<sup>+</sup>.

**m. p.:** 97 °C

**Dimethyl 2-(2-(4-bromophenyl)-2-oxoethyl)-2-hydroxymalonate (2g)**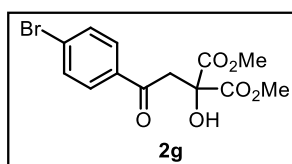

Cyclopropane **1g** (49.6 mg, 158  $\mu$ mol, 1.0 eq.) was reacted according to **GP2-A**. Column chromatography (SiO<sub>2</sub>, PE/EtOAc 4:1) afforded the desired product **2g** (44.8 mg, 130  $\mu$ mol, 82%) as a colourless solid.

## SUPPORTING INFORMATION

**<sup>1</sup>H-NMR** (400 MHz, CDCl<sub>3</sub>): δ = 7.83 – 7.80 (m, 2H), 7.64 – 7.60 (m, 2H), 4.24 (br, s, 1H), 3.85 (s, 6H), 3.81 (s, 2H).

**<sup>13</sup>C-NMR** (101 MHz, CDCl<sub>3</sub>): δ = 195.5, 170.1 (2C), 135.1, 132.2 (2C), 129.9 (2C), 129.3, 76.9, 53.9 (2C), 43.8.

**IR** (ATR):  $\tilde{\nu}$  (cm<sup>-1</sup>) = 3483 (br), 2956 (w), 2852 (w), 1743 (s), 1688 (m), 1583 (w), 1439 (m), 1235 (s), 1137 (m), 1073 (w).

**HRMS** (ESI): C<sub>13</sub>H<sub>13</sub>BrO<sub>6</sub> (343.98) calcd.: 382.95271 found: 382.95274, [M+K]<sup>+</sup>.

**m. p.:** 111 °C

**Diethyl 2-hydroxy-2-(2-oxo-2-phenylethyl)malonate (2h)**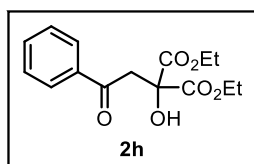

Cyclopropane **1h** (40.0 mg, 152 μmol, 1.0 eq.) was reacted according to **GP2-A**. Column chromatography (SiO<sub>2</sub>, PE/EtOAc 4:1) afforded the desired product **2h** (31.3 mg, 106 μmol, 70%) as a colourless oil.

**<sup>1</sup>H-NMR** (400 MHz, CDCl<sub>3</sub>): δ = 7.98 – 7.95 (m, 2H), 7.61 – 7.57 (m, 1H), 7.50 – 7.45 (m, 2H), 4.30 (q, *J* = 7.1 Hz, 1H), 4.29 (br, s, 1H), 1.29 (t, *J* = 7.1 Hz, 1H).

**<sup>13</sup>C-NMR** (101 MHz, CDCl<sub>3</sub>): δ = 196.4, 169.7 (2C), 136.3, 133.7, 128.7 (2C), 128.2 (2C), 76.9, 62.8 (2C), 43.5, 14.0 (2C).

**IR** (ATR):  $\tilde{\nu}$  (cm<sup>-1</sup>) = 3487 (br), 2983 (w), 2934 (w), 1738 (s), 1688 (m), 1593 (w), 1451 (m), 1229 (s), 1136 (m), 1071 (w).

**HRMS** (ESI): C<sub>15</sub>H<sub>18</sub>O<sub>6</sub> (294.11) calcd.: 333.07350 found: 333.07352, [M+K]<sup>+</sup>.

**m. p.:** 111 °C



**Dimethyl 2-hydroxy-2-(2-(4-methoxyphenyl)-2-oxoethyl)malonate (2j)**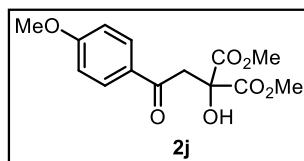

Cyclopropane **1j** (37.5 mg, 142  $\mu\text{mol}$ , 1.0 eq.) and CoTPP (3.0 mg, 4.46  $\mu\text{mol}$ , 3.1 mol%) were reacted according to **GP2-B**. Column chromatography ( $\text{SiO}_2$ , PE/EtOAc 3:1) afforded the desired product **2j** (33.4 mg, 113  $\mu\text{mol}$ , 79%) as a colourless solid.

**$^1\text{H-NMR}$**  (400 MHz,  $\text{CDCl}_3$ ):  $\delta$  = 7.95 – 7.92 (m, 2H), 6.95 – 6.92 (m, 2H), 4.37 (br, s, 1H), 3.87 (s, 3H), 3.84 (s, 6H), 3.80 (s, 2H).

**$^{13}\text{C-NMR}$**  (101 MHz,  $\text{CDCl}_3$ ):  $\delta$  = 195.2, 170.3 (2C), 164.3, 130.7 (2C), 129.4, 114.0 (2C), 77.2, 55.7, 53.7 (2C), 43.5.

**IR** (ATR):  $\tilde{\nu}$  ( $\text{cm}^{-1}$ ) = 3395 (br, m), 2952 (w), 2846 (w), 1739 (s), 1676 (m), 1587 (m), 1445 (m), 1234 (s), 1122 (m), 1038 (m).

**HRMS** (ESI):  $\text{C}_{14}\text{H}_{16}\text{O}_7$  (296.08) calcd.: 319.07882 found: 319.07903,  $[\text{M}+\text{Na}]^+$ .

**m. p.:** 81  $^\circ\text{C}$

**Dimethyl 2-hydroxy-2-(2-oxo-2-(thiophen-2-yl)ethyl)malonate (2i)**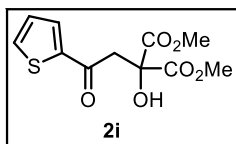

Cyclopropane **1i** (38.3 mg, 159  $\mu\text{mol}$ , 1.0 eq.) and DDQ (34.3 mg, 151  $\mu\text{mol}$ , 0.95 eq.) were reacted according to **GP2-B**. Column chromatography ( $\text{SiO}_2$ , PE/EtOAc 4:1) afforded the desired product **2i** (28.1 mg, 103  $\mu\text{mol}$ , 65%) as a colourless solid.

**$^1\text{H-NMR}$**  (500 MHz,  $\text{CDCl}_3$ ):  $\delta$  = 7.77 (dd,  $J$  = 3.8, 1.2 Hz, 1H), 7.69 (dd,  $J$  = 5.0, 1.1 Hz, 1H), 7.15 (dd,  $J$  = 4.9, 3.8 Hz, 1H), 4.29 (br, s, 1H), 3.85 (s, 6H), 3.87 (s, 2H).

**$^{13}\text{C-NMR}$**  (126 MHz,  $\text{CDCl}_3$ ):  $\delta$  = 189.2, 170.0 (2C), 143.4, 135.0, 133.1, 128.5, 77.0, 53.8 (2C), 44.2.

**IR** (ATR):  $\tilde{\nu}$  ( $\text{cm}^{-1}$ ) = 3479 (br), 2957 (w), 2851 (w), 1741 (s), 1662 (m), 1517 (w), 1438 (m), 1240 (s), 1136 (m), 1031 (w).

## SUPPORTING INFORMATION

**HRMS** (ESI): C<sub>11</sub>H<sub>12</sub>O<sub>6</sub>S (272.04) calcd.: 295.02468 found: 295.02480, [M+Na]<sup>+</sup>.

**m. p.:** 95 °C

**Dimethyl 2-hydroxy-2-(2-(naphthalen-2-yl)-2-oxoethyl)malonate (2k)**

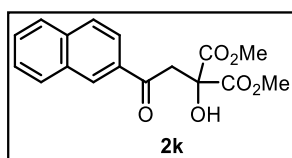

Cyclopropane **1k** (40.4 mg, 142 μmol, 1.0 eq.) and DDQ (33.9 mg, 149 μmol, 1.05 eq.) were reacted according to **GP2-C**. Column chromatography (SiO<sub>2</sub>, PE/EtOAc 4:1) afforded the desired product **2k** (18.7 mg, 59.1 μmol, 42%) as a pale yellow oil.

**<sup>1</sup>H-NMR** (500 MHz, CDCl<sub>3</sub>): δ = 8.50 – 8.49 (m, 1H), 8.02 – 7.96 (m, 2H), 7.91 – 7.87 (m, 2H), 7.69 (dddd, *J* = 21.6, 8.1, 6.9, 1.3 Hz, 2H), 4.36 (br, s, 1H), 4.00 (s, 2H), 3.87 (s, 6H).

**<sup>13</sup>C-NMR** (126 MHz, CDCl<sub>3</sub>): δ = 196.5, 170.3 (2C), 136.0, 133.6, 132.6, 130.6, 129.8, 129.1, 128.8, 128.0, 127.1, 123.7, 77.1, 53.8 (2C), 43.9.

**IR** (ATR):  $\tilde{\nu}$  (cm<sup>-1</sup>) = 3484 (br), 2955 (w), 2852 (w), 1741 (s), 1681 (m), 1509 (w), 1437 (m), 1281 (m), 1129 (m), 1025 (w).

**HRMS** (ESI): C<sub>17</sub>H<sub>16</sub>O<sub>6</sub> (316.09) calcd.: 339.08391 found: 339.08274, [M+Na]<sup>+</sup>.

**m. p.:** 95 °C

**Dimethyl 2-(2-(4-acetoxyphenyl)-2-oxoethyl)-2-hydroxymalonate (2m)**

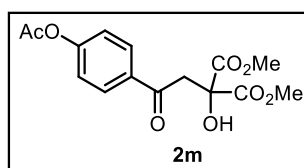

Cyclopropane **1m** (41.7 mg, 143 μmol, 1.0 eq.) and DDQ (34.0 mg, 150 μmol, 1.05 eq.) were reacted according to **GP2-C**. Column chromatography (SiO<sub>2</sub>, PE/EtOAc 3:1) afforded the desired product **2m** (23.8 mg, 73.4 μmol, 51%) as a colourless solid.

**<sup>1</sup>H-NMR** (400 MHz, CDCl<sub>3</sub>): δ = 8.01 – 7.98 (m, 2H), 7.23 – 7.19 (m, 2H), 3.84 (s, 6H), 3.83 (s, 2H), 2.33 (s, 3H).

No *OH*-signal was observed.

## SUPPORTING INFORMATION

**$^{13}\text{C}$ -NMR** (101 MHz,  $\text{CDCl}_3$ ):  $\delta$  = 195.3, 170.2 (2C), 168.9, 155.1, 133.9, 130.1 (2C), 122.1 (2C), 77.0, 53.8 (2C), 43.9, 21.3.

**IR** (ATR):  $\tilde{\nu}$  ( $\text{cm}^{-1}$ ) = 3474 (br), 2958 (w), 2848 (w), 1744 (s), 1599 (m), 1506 (w), 1437 (m), 1195 (s), 1140 (m), 1039 (w).

**HRMS** (ESI):  $\text{C}_{15}\text{H}_{16}\text{O}_8$  (324.08) calcd.: 347.07374 found: 347.07394,  $[\text{M}+\text{Na}]^+$ .

**m. p.:** 94 °C

**Dimethyl 2-(2-([1,1'-biphenyl]-4-yl)-2-oxoethyl)-2-hydroxymalonate (2I)**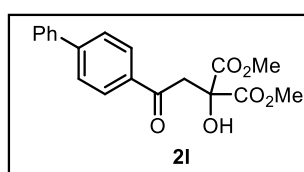

Cyclopropane **1I** (46.8 mg, 151  $\mu\text{mol}$ , 1.0 eq.) and DDQ (34.1 mg, 150  $\mu\text{mol}$ , 0.99 eq.) were reacted according to **GP2-C**. Column chromatography ( $\text{SiO}_2$ , PE/EtOAc 3:1) afforded the desired product **2I** (31.5 mg, 92.3  $\mu\text{mol}$ , 61%) as a colourless solid.

**$^1\text{H}$ -NMR** (400 MHz,  $\text{CDCl}_3$ ):  $\delta$  = 8.06 – 8.01 (m, 2H), 7.72 – 7.68 (m, 2H), 7.65 – 7.61 (m, 2H), 7.51 – 7.45 (m, 2H), 7.44 – 7.38 (m, 1H), 4.33 (br, s, 1H), 3.89 (s, 2H), 3.86 (s, 6H).

**$^{13}\text{C}$ -NMR** (101 MHz,  $\text{CDCl}_3$ ):  $\delta$  = 196.2, 170.3 (2C), 146.7, 139.8, 135.0, 129.2 (2C), 129.0 (2C), 128.6, 127.5 (2C), 127.4 (2C), 77.1, 53.8 (2C), 43.9.

**IR** (ATR):  $\tilde{\nu}$  ( $\text{cm}^{-1}$ ) = 3453 (br, m), 2959 (w), 2851 (w), 1736 (s), 1603 (m), 1517 (w), 1437 (m), 1212 (m), 1118 (m), 1041 (w).

**HRMS** (ESI):  $\text{C}_{19}\text{H}_{18}\text{O}_6$  (342.11) calcd.: 365.09956 found: 365.09969,  $[\text{M}+\text{Na}]^+$ .

**m. p.:** 151 °C

## 5. Electrochemical Synthesis of Dioxanes

### Dimethyl 6-phenyl-1,2-dioxane-3,3-dicarboxylate (**4a**)

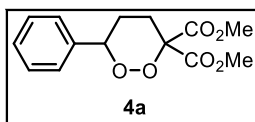

Cyclobutane **3a** (25 mg, 101  $\mu\text{mol}$ , 1.0 eq.) was reacted according to **GP3**. Column chromatography ( $\text{SiO}_2$ , PE/EtOAc 4:1) afforded the desired product **4a** (28.0 mg, 99.9  $\mu\text{mol}$ , 99%) as a colourless oil.

**$^1\text{H-NMR}$**  (500 MHz,  $\text{CDCl}_3$ ):  $\delta$  = 7.37 – 7.28 (m, 5H), 5.24 (dd,  $J$  = 11.5, 2.5 Hz, 1H), 3.88 (s, 3H), 3.84 (s, 3H), 2.75 (ddd,  $J$  = 13.5, 4.7, 2.6 Hz, 1H), 2.41 – 2.32 (m, 1H), 2.18 (ddd,  $J$  = 13.5, 12.4, 5.0 Hz, 1H), 2.08 – 2.03 (m, 1H).

**$^{13}\text{C-NMR}$**  (126 MHz,  $\text{CDCl}_3$ ):  $\delta$  = 167.3, 166.8, 137.2, 129.2, 128.7 (2C), 127.5 (2C), 85.7, 83.2, 53.5, 53.4, 28.3, 26.5.

**IR** (ATR):  $\tilde{\nu}$  ( $\text{cm}^{-1}$ ) = 2957 (w), 2852 (w), 1746 (s), 1496 (m), 1282 (m), 1254 (m), 1223 (m), 1113 (m), 1035 (w), 1008 (m).

**HRMS** (ESI):  $\text{C}_{14}\text{H}_{16}\text{O}_6$  (280.09) calcd.: 303.08391 found: 303.08397,  $[\text{M}+\text{Na}]^+$ .

### Dimethyl 6-(*o*-tolyl)-1,2-dioxane-3,3-dicarboxylate (**4b**)

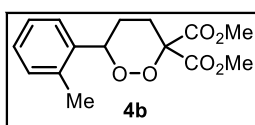

Cyclobutane **3b** (25.9 mg, 98.9  $\mu\text{mol}$ , 1.0 eq.) was reacted according to **GP3**. Column chromatography ( $\text{SiO}_2$ , PE/EtOAc 4:1) afforded the desired product **4b** (21.9 mg, 74.2  $\mu\text{mol}$ , 75%) as a colourless oil.

**$^1\text{H-NMR}$**  (500 MHz,  $\text{CDCl}_3$ ):  $\delta$  = 7.25 – 7.16 (m, 4H), 5.43 (dd,  $J$  = 11.7, 2.4 Hz, 1H), 3.88 (s, 3H), 3.84 (s, 3H), 2.79 (ddd,  $J$  = 13.5, 4.7, 2.5 Hz, 1H), 2.49 – 2.40 (m, 1H), 2.42 (s, 3H), 2.19 (ddd,  $J$  = 13.6, 12.6, 5.0 Hz, 1H), 1.99 (ddt,  $J$  = 13.7, 4.9, 2.4 Hz, 1H).

**$^{13}\text{C-NMR}$**  (126 MHz,  $\text{CDCl}_3$ ):  $\delta$  = 167.4, 166.8, 137.6, 134.9, 130.8, 129.1, 126.5, 126.2, 85.8, 80.3, 53.5, 53.4, 28.6, 25.6, 19.4.

## SUPPORTING INFORMATION

**IR** (ATR):  $\tilde{\nu}$  (cm<sup>-1</sup>) = 2955 (w), 2853 (w), 1748 (s), 1439 (m), 1284 (s), 1252 (m), 1219 (m), 1113 (m), 1072 (w), 1007 (m).

**HRMS** (ESI): C<sub>15</sub>H<sub>18</sub>O<sub>6</sub> (294.11) calcd.: 317.09956 found: 317.09968, [M+Na]<sup>+</sup>.

**Dimethyl 6-(*m*-tolyl)-1,2-dioxane-3,3-dicarboxylate (4c)**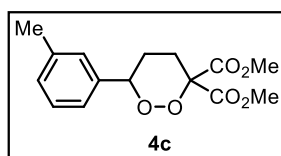

Cyclobutane **3c** (27.2 mg, 104  $\mu$ mol, 1.0 eq.) was reacted according to **GP3**. Column chromatography (SiO<sub>2</sub>, PE/EtOAc 4:1) afforded the desired product **4c** (26.4 mg, 90.3  $\mu$ mol, 87%) as a pale yellow solid.

**<sup>1</sup>H-NMR** (400 MHz, CDCl<sub>3</sub>):  $\delta$  = 7.25 – 7.21 (m, 1H), 7.15 – 7.08 (m, 3H), 5.20 (dd,  $J$  = 11.4, 2.4 Hz, 1H), 3.88 (s, 3H), 3.83 (s, 3H), 2.74 (ddd,  $J$  = 13.4, 4.6, 2.6 Hz, 1H), 2.41 – 2.31 (m, 1H), 2.34 (s, 3H), 2.21 – 2.13 (m, 1H), 2.03 (ddt,  $J$  = 13.4, 4.9, 2.6 Hz, 1H).

**<sup>13</sup>C-NMR** (101 MHz, CDCl<sub>3</sub>):  $\delta$  = 167.4, 166.9, 138.4, 137.1, 129.9, 128.6, 128.2, 124.6, 85.7, 83.2, 53.5, 53.4, 28.3, 26.5, 21.5.

**IR** (ATR):  $\tilde{\nu}$  (cm<sup>-1</sup>) = 2956 (w), 2854 (w), 1744 (s), 1437 (m), 1281 (s), 1252 (m), 1217 (m), 1112 (m), 1042 (w), 1008 (m).

**HRMS** (ESI): C<sub>15</sub>H<sub>18</sub>O<sub>6</sub> (294.11) calcd.: 317.09956 found: 317.09958, [M+Na]<sup>+</sup>.

**m. p.:** 91 °C

**Dimethyl 6-(*p*-tolyl)-1,2-dioxane-3,3-dicarboxylate (4d)**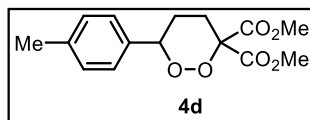

Cyclobutane **3d** (27.0 mg, 104  $\mu$ mol, 1.0 eq.) was reacted according to **GP3**. Column chromatography (SiO<sub>2</sub>, PE/EtOAc 4:1) afforded the desired product **4d** (27.7 mg, 88.6  $\mu$ mol, 86%) as a pale yellow solid.

## SUPPORTING INFORMATION

**<sup>1</sup>H-NMR** (400 MHz, CDCl<sub>3</sub>): δ = 7.21 – 7.13 (m, 4H), 5.20 (dd, *J* = 11.5, 2.5 Hz, 1H), 3.87 (s, 3H), 3.83 (s, 3H), 2.74 (ddd, *J* = 13.5, 4.7, 2.6 Hz, 1H), 2.41 – 2.32 (m, 1H), 2.33 (s, 3H), 2.20 – 2.13 (m, 1H), 2.02 (ddt, *J* = 13.6, 5.1, 2.6 Hz, 1H).

**<sup>13</sup>C-NMR** (126 MHz, CDCl<sub>3</sub>): δ = 167.4, 166.9, 139.2, 134.1, 129.4 (2C), 127.6 (2C), 85.6, 83.0, 53.5, 53.4, 28.3, 26.3, 21.4.

**IR** (ATR):  $\tilde{\nu}$  (cm<sup>-1</sup>) = 2956 (w), 2855 (w), 1747 (s), 1437 (m), 1282 (s), 1254 (m), 1224 (m), 1121 (m), 1040 (w), 1010 (m).

**HRMS** (ESI): C<sub>15</sub>H<sub>18</sub>O<sub>6</sub> (294.11) calcd.: 317.09956 found: 317.09966, [M+Na]<sup>+</sup>.

**m. p.:** 90 °C

**Dimethyl 6-(4-fluorophenyl)-1,2-dioxane-3,3-dicarboxylate (4e)**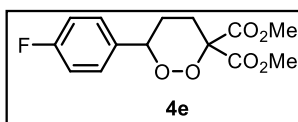

Cyclobutane **3e** (27.8 mg, 105 μmol, 1.0 eq.) was reacted according to **GP3**. Column chromatography (SiO<sub>2</sub>, PE/EtOAc 4:1) afforded the desired product **4e** (23 mg, 77.4 μmol, 74%) as a pale yellow solid.

**<sup>1</sup>H-NMR** (400 MHz, CDCl<sub>3</sub>): δ = 7.30 – 7.25 (m, 2H), 7.06 – 7.00 (m, 2H), 5.20 (dd, *J* = 11.4, 2.5 Hz, 1H), 3.87 (s, 3H), 3.83 (s, 3H), 2.74 (ddd, *J* = 13.4, 4.6, 2.7 Hz, 1H), 2.39 – 2.28 (m, 1H), 2.17 (ddd, *J* = 13.4, 12.3, 4.9 Hz, 1H), 2.04 (ddt, *J* = 13.3, 4.9, 2.6 Hz, 1H).

**<sup>13</sup>C-NMR** (126 MHz, CDCl<sub>3</sub>): δ = 167.3, 166.7, 163.2 (d, *J* = 248.2 Hz, 1C), 132.9 (d, *J* = 3.2 Hz, 1C), 129.5 (d, *J* = 8.4 Hz, 2C), 115.7 (d, *J* = 21.6 Hz, 2C), 85.6, 82.4, 53.5, 53.4, 28.1, 26.5.

**<sup>19</sup>F-NMR** (377 MHz, CDCl<sub>3</sub>): δ = -112.6 (s, 1F).

**IR** (ATR):  $\tilde{\nu}$  (cm<sup>-1</sup>) = 2957 (w), 2853 (w), 1749 (s), 1438 (m), 1283 (m), 1256 (m), 1225 (s), 1115 (w), 1037 (m), 1010 (m).

**HRMS** (ESI): C<sub>14</sub>H<sub>15</sub>FO<sub>6</sub> (298.08) calcd.: 321.07449 found: 321.07459, [M+Na]<sup>+</sup>.

**m. p.:** 115 °C

## SUPPORTING INFORMATION

**Dimethyl 6-(4-chlorophenyl)-1,2-dioxane-3,3-dicarboxylate (4f)**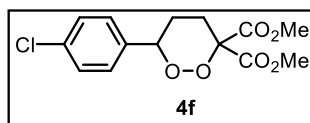

Cyclobutane **3f** (28.1 mg, 99.3  $\mu\text{mol}$ , 1.0 eq.) was reacted according to **GP3**. Column chromatography ( $\text{SiO}_2$ , PE/EtOAc 4:1) afforded the desired product **4f** (21.3 mg, 69.6  $\mu\text{mol}$ , 68%) as a pale yellow solid.

**$^1\text{H-NMR}$**  (400 MHz,  $\text{CDCl}_3$ ):  $\delta$  = 7.33 – 7.30 (m, 2H), 7.24 – 7.21 (m, 2H), 5.20 (dd,  $J$  = 11.3, 2.5 Hz, 1H), 3.87 (s, 3H), 3.83 (s, 3H), 2.73 (ddd,  $J$  = 13.5, 4.5, 2.7 Hz, 1H), 2.35 – 2.26 (m, 1H), 2.20 – 2.17 (m, 1H), 2.04 (ddt,  $J$  = 13.4, 4.9, 2.7 Hz, 1H).

**$^{13}\text{C-NMR}$**  (126 MHz,  $\text{CDCl}_3$ ):  $\delta$  = 167.2, 166.7, 135.6, 135.1, 129.0 (2C), 128.8 (2C), 85.6, 82.3, 53.6, 53.5, 28.0, 26.4.

**IR** (ATR):  $\tilde{\nu}$  ( $\text{cm}^{-1}$ ) = 2956 (w), 2853 (w), 1745 (s), 1437 (m), 1285 (s), 1254 (m), 1223 (m), 1117 (w), 1093 (m), 1011 (m).

**HRMS** (ESI):  $\text{C}_{14}\text{H}_{15}\text{ClO}_6$  (317.05) calcd.: 353.01887 found: 353.01898,  $[\text{M}+\text{K}]^+$ .

**m. p.:** 114  $^\circ\text{C}$

**Dimethyl 6-(4-bromophenyl)-1,2-dioxane-3,3-dicarboxylate (4g)**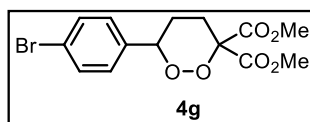

Cyclobutane **3g** (33.7 mg, 104  $\mu\text{mol}$ , 1.0 eq.) was reacted according to **GP3**. Column chromatography ( $\text{SiO}_2$ , PE/EtOAc 4:1) afforded the desired product **4g** (25 mg, 69.6  $\mu\text{mol}$ , 68%) as a pale yellow solid.

**$^1\text{H-NMR}$**  (400 MHz,  $\text{CDCl}_3$ ):  $\delta$  = 7.50 – 7.46 (m, 2H), 7.18 – 7.14 (m, 2H), 5.18 (dd,  $J$  = 11.2, 2.6 Hz, 1H), 3.87 (s, 3H), 3.83 (s, 3H), 2.75 – 2.70 (m, 1H), 2.35 – 2.25 (m, 1H), 2.21 – 2.13 (m, 1H), (2.08 – 2.03 (m, 1H)

**$^{13}\text{C-NMR}$**  (126 MHz,  $\text{CDCl}_3$ ):  $\delta$  = 167.2, 166.7, 136.2, 131.9 (2C), 129.1 (2C), 123.3, 85.6, 82.4, 53.5, 53.4, 28.0, 26.4.

**IR** (ATR):  $\tilde{\nu}$  ( $\text{cm}^{-1}$ ) = 2956 (w), 2853 (w), 1745 (s), 1437 (m), 1285 (s), 1254 (m), 1223 (m), 1117 (w), 1093 (m), 1011 (m).

SUPPORTING INFORMATION

---

**HRMS** (ESI): C<sub>14</sub>H<sub>15</sub>BrO<sub>6</sub> (358.00) calcd.: 380.99442 found: 380.99478, [M+Na]<sup>+</sup> .

**m. p.:** 124 °C



## 6. Synthesis of $\gamma$ -Hydroxy Ketones

### Dimethyl 2-hydroxy-2-(3-oxo-3-phenylpropyl)malonate (**5a**)

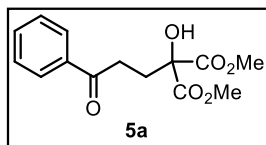

Dioxane **4a** (15 mg, 53.5  $\mu$ mol, 1.0 eq.) and  $\text{NEt}_3$  (6.50 mg, 8.90  $\mu$ L, 64.2  $\mu$ mol, 1.20 eq.) were reacted according to **GP4**. Column chromatography ( $\text{SiO}_2$ , PE/EtOAc 2:1) afforded the desired product **5a** (14.3 mg, 51.0  $\mu$ mol, 95%) as a white solid.

“**one-pot approach**”: Cyclobutane **3a** (25.1 mg, 101  $\mu$ mol, 1.0 eq.) was reacted according to **GP3** for 16 h. After removal of the solvents, the crude material was dissolved in  $\text{CH}_2\text{Cl}_2$  and was reacted with  $\text{NEt}_3$  (12.1 mg, 16.6  $\mu$ L, 120  $\mu$ mol, 1.20 eq.) as described in **GP4**. Column chromatography ( $\text{SiO}_2$ , PE/EtOAc 4:1) afforded the desired product **5a** (18.0 mg, 64.6  $\mu$ mol, 64% over 2 steps) as a white solid.

**$^1\text{H-NMR}$**  (400 MHz,  $\text{CDCl}_3$ ):  $\delta$  = 7.98 – 7.94 (m, 2H), 7.59 – 7.54 (m, 1H), 7.49 – 7.43 (m, 2H), 3.92 (br, s, 1H), 3.82 (s, 6H), 3.13 – 3.09 (m, 2H), 2.53 – 2.49 (m, 2H).

**$^{13}\text{C-NMR}$**  (101 MHz,  $\text{CDCl}_3$ ):  $\delta$  = 199.1, 170.1 (2C), 136.7, 133.3, 128.7 (2C), 128.2 (2C), 78.3, 53.7 (2C), 32.8, 29.4.

**IR** (ATR):  $\tilde{\nu}$  ( $\text{cm}^{-1}$ ) = 3478 (br), 2956 (w), 2854 (w), 1741 (s), 1685 (s), 1446 (m), 1270 (m), 1233 (m), 1074 (m), 1027 (w).

**HRMS** (ESI):  $\text{C}_{14}\text{H}_{16}\text{O}_6$  (280.09) calcd.: 303.08391 found: 303.08405,  $[\text{M}+\text{Na}]^+$ .

**m. p.**: 78  $^\circ\text{C}$

### Dimethyl 2-hydroxy-2-(3-oxo-3-(*o*-tolyl)propyl)malonate (**5b**)

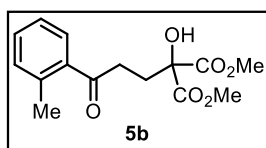

Dioxane **4b** (3.7 mg, 12.5  $\mu$ mol, 1.0 eq.) and  $\text{NEt}_3$  (1.53 mg, 2.09  $\mu$ L, 15.1  $\mu$ mol, 1.20 eq.) were reacted according to **GP4**. Column chromatography ( $\text{SiO}_2$ , PE/EtOAc 2:1) afforded the desired product **5b** (2.50 mg, 8.45  $\mu$ mol, 68%) as a colourless oil.

## SUPPORTING INFORMATION

**<sup>1</sup>H-NMR** (400 MHz, CDCl<sub>3</sub>): δ = 7.66 – 7.64 (m, 1H), 7.37 (td, *J* = 7.5, 1.4 Hz, 1H), 7.27 – 7.23 (m, 2H), 3.88 (br, s, 1H), 3.83 (s, 6H), 3.04 – 3.01 (m, 2H), 2.50 – 2.47 (m, 2H), 2.49 (s, 3H).

**<sup>13</sup>C-NMR** (101 MHz, CDCl<sub>3</sub>): δ = 202.9, 170.9 (2C), 138.4, 137.6, 132.2, 131.6, 128.8, 125.9, 78.3, 53.7 (2C), 35.6, 29.5, 21.5.

**IR** (ATR):  $\tilde{\nu}$  (cm<sup>-1</sup>) = 3476 (br), 2955 (w), 2856 (w), 1742 (s), 1686 (m), 1443 (m), 1272 (s), 1232 (s), 1128 (m), 1030 (w).

**HRMS** (ESI): C<sub>15</sub>H<sub>18</sub>O<sub>6</sub> (294.11) calcd.: 317.09956 found: 317.09990, [M+Na]<sup>+</sup>.

**Dimethyl 2-hydroxy-2-(3-oxo-3-(*m*-tolyl)propyl)malonate (5c)**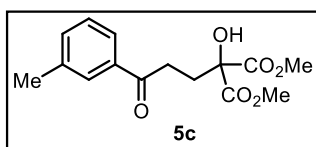

Dioxane **4c** (10 mg, 34 μmol, 1.0 eq.) and NEt<sub>3</sub> (4.13 mg, 5.66 μL, 40.8 μmol, 1.20 eq.) were reacted according to **GP4**. Column chromatography (SiO<sub>2</sub>, PE/EtOAc 2:1) afforded the desired product **5c** (10 mg, 34 μmol, quant.) as a colourless oil.

**<sup>1</sup>H-NMR** (400 MHz, CDCl<sub>3</sub>): δ = 7.78 – 7.72 (m, 2H), 7.39 – 7.31 (m, 2H), 3.93 (br, s, 1H), 3.83 (s, 6H), 3.12 – 3.07 (m, 2H), 2.52 – 2.48 (m, 2H), 2.40 (s, 3H).

**<sup>13</sup>C-NMR** (101 MHz, CDCl<sub>3</sub>): δ = 199.3, 170.9 (2C), 138.6, 136.8, 134.1, 128.7, 128.6, 125.4, 78.3, 53.7 (2C), 32.8, 29.5, 21.5.

**IR** (ATR):  $\tilde{\nu}$  (cm<sup>-1</sup>) = 3478 (br), 2955 (w), 2853 (w), 1741 (s), 1683 (m), 1440 (m), 1272 (m), 1236 (s), 1127 (s), 1041 (w).

**HRMS** (ESI): C<sub>15</sub>H<sub>18</sub>O<sub>6</sub> (294.11) calcd.: 317.09956 found: 317.09974, [M+Na]<sup>+</sup>.

**Dimethyl 2-hydroxy-2-(3-oxo-3-(*p*-tolyl)propyl)malonate (5d)**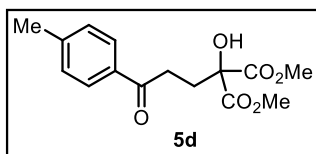

Dioxane **4d** (4.40 mg, 15.0  $\mu\text{mol}$ , 1.0 eq.) and  $\text{NEt}_3$  (1.82 mg, 2.49  $\mu\text{L}$ , 18.0  $\mu\text{mol}$ , 1.20 eq.) were reacted according to **GP4**. Column chromatography ( $\text{SiO}_2$ , PE/EtOAc 2:1) afforded the desired product **5d** (4.40 mg, 15.0  $\mu\text{mol}$ , quant.) as a white solid.

**$^1\text{H-NMR}$**  (400 MHz,  $\text{CDCl}_3$ ):  $\delta$  = 7.87 – 7.83 (m, 2H), 7.26 – 7.23 (m, 2H), 3.93 (br, s, 1H), 3.82 (s, 6H), 3.10 – 3.06 (m, 2H), 2.52 – 2.48 (m, 2H), 2.40 (s, 3H).

**$^{13}\text{C-NMR}$**  (101 MHz,  $\text{CDCl}_3$ ):  $\delta$  = 198.8, 170.9 (2C), 144.2, 134.3, 129.4 (2C), 128.4 (2C), 78.4, 53.7 (2C), 32.7, 29.5, 21.8.

**IR** (ATR):  $\tilde{\nu}$  ( $\text{cm}^{-1}$ ) = 3475 (br), 2955 (w), 2854 (w), 1742 (s), 1681 (m), 1442 (m), 1271 (s), 1236 (s), 1127 (m), 1032 (w).

**HRMS** (ESI):  $\text{C}_{15}\text{H}_{18}\text{O}_6$  (294.11) calcd.: 317.09956 found: 317.09974,  $[\text{M}+\text{Na}]^+$ .

**m. p.**: 85  $^\circ\text{C}$

**Dimethyl 2-(3-(4-fluorophenyl)-3-oxopropyl)-2-hydroxymalonate (5e)**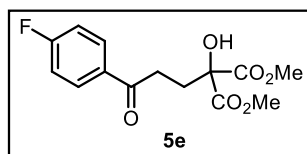

Dioxane **4e** (11.9 mg, 39.9  $\mu\text{mol}$ , 1.0 eq.) and  $\text{NEt}_3$  (4.84 mg, 6.63  $\mu\text{L}$ , 47.9  $\mu\text{mol}$ , 1.20 eq.) were reacted according to **GP4**. Column chromatography ( $\text{SiO}_2$ , PE/EtOAc 2:1) afforded the desired product **5e** (11.8 mg, 39.6  $\mu\text{mol}$ , 99%) as a white solid.

**$^1\text{H-NMR}$**  (400 MHz,  $\text{CDCl}_3$ ):  $\delta$  = 8.01 – 7.96 (m, 2H), 7.15 – 7.09 (m, 2H), 3.89 (br, s, 1H), 3.83 (s, 6H), 3.10 – 3.06 (m, 2H), 2.51 – 2.48 (m, 2H).

**$^{13}\text{C-NMR}$**  (101 MHz,  $\text{CDCl}_3$ ):  $\delta$  = 197.4, 170.9 (2C), 166.0 (d,  $J$  = 254.8 Hz, 1C), 133.2 (d,  $J$  = 3.0 Hz, 1C), 130.9 (d,  $J$  = 9.3 Hz, 2C), 115.9 (d,  $J$  = 21.9 Hz, 2C), 78.2, 53.7 (2C), 32.8, 29.4.

**$^{19}\text{F-NMR}$**  (377 MHz,  $\text{CDCl}_3$ ):  $\delta$  = -105.5 (s, 1F).

## SUPPORTING INFORMATION

**IR** (ATR):  $\tilde{\nu}$  (cm<sup>-1</sup>) = 3472 (br), 2957 (w), 2856 (w), 1739 (s), 1684 (m), 1441 (m), 1271 (m), 1230 (s), 1128 (m), 1031 (w).

**HRMS** (ESI): C<sub>14</sub>H<sub>15</sub>FO<sub>6</sub> (298.08) calcd.: 337.04842 found: 337.04852, [M+K]<sup>+</sup>.

**m. p.:** 81 °C

**Dimethyl 2-(3-(4-chlorophenyl)-3-oxopropyl)-2-hydroxymalonate (5f)**

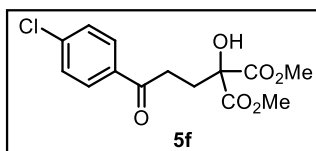

Dioxane **4f** (7.8 mg, 24.8  $\mu$ mol, 1.0 eq.) and NEt<sub>3</sub> (3.01 mg, 4.12  $\mu$ L, 29.7  $\mu$ mol, 1.20 eq.) were reacted according to **GP4**. Column chromatography (SiO<sub>2</sub>, PE/EtOAc 2:1) afforded the desired product **5f** (6.85 mg, 21.8  $\mu$ mol, 88%) as a white solid.

**<sup>1</sup>H-NMR** (500 MHz, CDCl<sub>3</sub>):  $\delta$  = 7.91 – 7.88 (m, 2H), 7.44 – 7.41 (m, 2H), 3.87 (br, s, 1H), 3.83 (s, 6H), 3.09 – 3.06 (m, 2H), 2.51 – 2.48 (m, 2H).

**<sup>13</sup>C-NMR** (126 MHz, CDCl<sub>3</sub>):  $\delta$  = 197.8, 170.8 (2C), 139.8, 135.0, 129.7 (2C), 129.1 (2C), 78.2, 53.7 (2C), 32.8, 29.3.

**IR** (ATR):  $\tilde{\nu}$  (cm<sup>-1</sup>) = 3462 (br), 2955 (w), 2855 (w), 1738 (s), 1685 (m), 1441 (m), 1272 (s), 1232 (s), 1128 (s), 1036 (m).

**HRMS** (ESI): C<sub>14</sub>H<sub>15</sub>ClO<sub>6</sub> (314.05) calcd.: 353.01888 found: 353.01887, [M+K]<sup>+</sup>.

**m. p.:** 82 °C

**Dimethyl 2-(3-(4-bromophenyl)-3-oxopropyl)-2-hydroxymalonate (5g)**

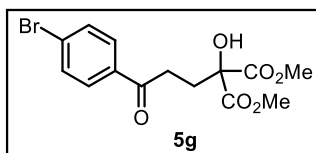

Dioxane **4g** (11.5 mg, 32.0  $\mu$ mol, 1.0 eq.) and NEt<sub>3</sub> (4.67 mg, 6.40  $\mu$ L, 46.1  $\mu$ mol, 1.20 eq.) were reacted according to **GP4**. Column chromatography (SiO<sub>2</sub>, PE/EtOAc 2:1) afforded the desired product **5g** (10.4 mg, 28.9  $\mu$ mol, 90%) as a white solid.

**<sup>1</sup>H-NMR** (500 MHz, CDCl<sub>3</sub>):  $\delta$  = 7.83 – 7.80 (m, 2H), 7.61 – 7.58 (m, 2H), 3.87 (br, s, 1H), 3.82 (s, 6H), 3.09 – 3.05 (m, 2H), 2.51 – 2.47s (m, 2H).

SUPPORTING INFORMATION

---

**<sup>13</sup>C-NMR** (126 MHz, CDCl<sub>3</sub>):  $\delta$  = 198.0, 170.8 (2C), 135.5, 132.1 (2C), 129.8 (2C), 128.5, 78.2, 53.7 (2C), 32.8, 29.3.

**IR** (ATR):  $\tilde{\nu}$  (cm<sup>-1</sup>) = 3479 (br), 2955 (w), 2852 (w), 1740 (s), 1686 (s), 1441 (m), 1273 (s), 1234 (s), 1128 (s), 1036 (m).

**HRMS** (ESI): C<sub>14</sub>H<sub>15</sub>BrO<sub>6</sub> (358.00) calcd.: 380.99442 found: 380.99477, [M+Na]<sup>+</sup>.

**m. p.:** 111 °C

## 7. Synthesis of Follow-up Products

### 7.1 Products from $\beta$ -hydroxy ketone 2a

#### Dimethyl 2-hydroxy-2-phenethylmalonate (**8**)

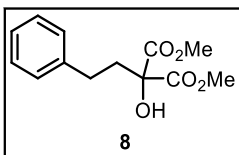

$\beta$ -Hydroxy ketone **2a** (100 mg, 376  $\mu$ mol, 1.0 eq.) and Pd/C (10 wt. % loading, 6 mg, 56.3  $\mu$ mol, 15 mol%) were evacuated and backfilled with H<sub>2</sub> (3 cycles) before EtOH (5 mL) and EtOAc (1 mL) were added. The reaction mixture was saturated with H<sub>2</sub> gas for 5 min and was stirred for 14 h under an H<sub>2</sub> atmosphere at rt. Filtration through a celite pad and removal of the solvents *in vacuo* afforded product **8** (85 mg, 337  $\mu$ mol, 90%) as a white solid.

**<sup>1</sup>H-NMR** (400 MHz, CDCl<sub>3</sub>):  $\delta$  = 7.31 – 7.26 (m, 2H), 7.21 – 7.16 (m, 3H), 3.84 (br, s, 1H), 3.76 (s, 6H), 2.69 – 2.65 (m, 2H), 2.39 – 2.35 (m, 2H).

**<sup>13</sup>C-NMR** (101 MHz, CDCl<sub>3</sub>):  $\delta$  = 171.0 (2C), 140.9, 128.7 (2C), 128.5 (2C), 126.3, 78.7, 53.6 (2C), 36.6, 29.6.

**IR** (ATR):  $\tilde{\nu}$  (cm<sup>-1</sup>) = 3489 (br), 2955 (w), 2853 (w), 1736 (s), 1438 (m), 1268 (m), 1228 (s), 1201 (s), 1125 (s), 1061 (m).

**HRMS** (ESI): C<sub>13</sub>H<sub>16</sub>O<sub>5</sub> (252.09) calcd.: 291.06298 found: 291.06293, [M+K]<sup>+</sup>.

**m. p.:** 60 °C

#### Ethyl 3-oxo-6-phenyl-2,3-dihydropyridazine-4-carboxylate (**9**)

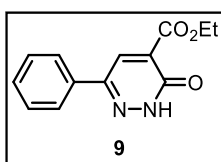

In a microwave vial  $\beta$ -hydroxy ketone **1a** (26.2 mg, 100  $\mu$ mol, 1.0 eq.) and hydrazine hydrochloride (13.7 mg, 200  $\mu$ mol, 2.0 eq.) were dissolved in EtOH (3 mL). After sealing the vial, the reaction mixture was heated for 24 h at 110 °C. The reaction was stopped by the addition of H<sub>2</sub>O and EtOAc at rt and the phases were separated. The aq. phase was extracted with EtOAc (3  $\times$  2 mL) and the organic layer was dried over anhydrous Na<sub>2</sub>SO<sub>4</sub>.

## SUPPORTING INFORMATION

Purification by column chromatography (SiO<sub>2</sub>, PE/EtOAc 2:1) afforded the desired heterocyclic compound **9** (22.3 mg, 91.3 μmol, 81%).

**<sup>1</sup>H-NMR** (400 MHz, CDCl<sub>3</sub>): δ = 12.9 (s, 1H), 8.32 (s, 1H), 7.83 – 7.80 (m, 2H), 7.51 – 7.42 (m, 3H), 4.46 (q, *J* = 7.1 Hz, 1H), 1.43 (t, *J* = 7.1 Hz, 1H).

The analytical data were in accordance with those reported in the literature.<sup>[15]</sup>

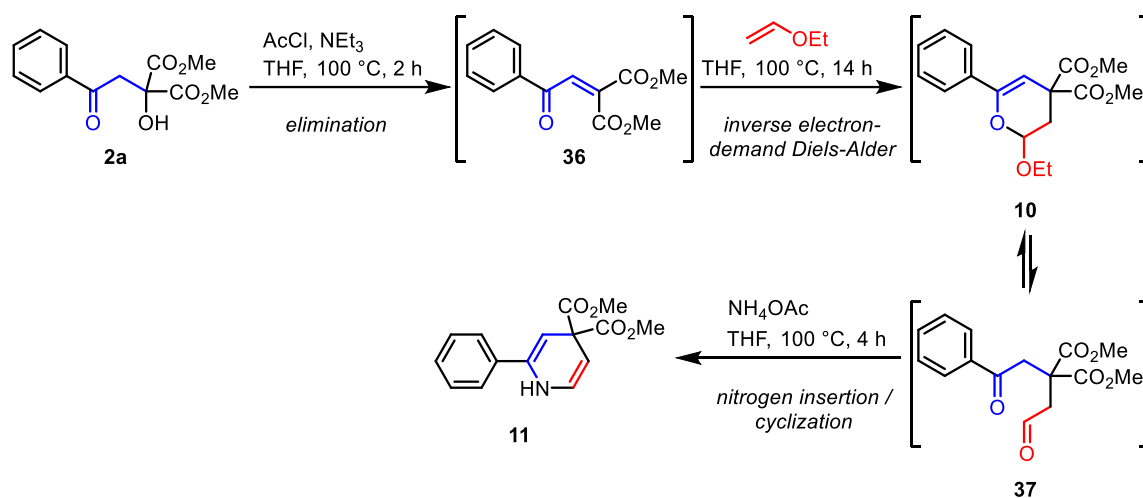

**Scheme S5.** Sequence leading to the heterocyclic compound **11**.

### Dimethyl 2-phenylpyridine-4,4(1H)-dicarboxylate (**11**)

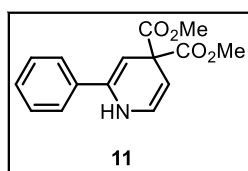

In a capped microwave vial a solution of β-hydroxy ketone **2a** (40.0 mg, 150 μmol, 1.0 eq.), acetyl chloride (59.0 mg, 53.6 μL, 751 μmol, 5.0 eq.) and NEt<sub>3</sub> (152 mg, 210 μL, 1.50 mmol, 10.0 eq.) in THF was stirred at 100 °C for 2 h. After cooling to rt, ethyl vinyl ether (108 mg, 144 μL, 1.50 mmol, 10.0 eq.) was added, the vial was resealed and the resulting mixture was stirred for 14 h at 100 °C. At rt NH<sub>4</sub>OAc (115.8 mg, 1.50 mmol, 10 eq.) was added, the vial was again resealed and heated for another 4 h at 100 °C. Removal of the solvents *in vacuo* and subsequent column chromatography (SiO<sub>2</sub>, PE/EtOAc 20:1 → 10:1) afforded the desired heterocyclic compound **11** (9 mg, 32.9 μmol, 22% over 3 steps) as a colourless oil.

**<sup>1</sup>H-NMR** (500 MHz, CDCl<sub>3</sub>): δ = 8.22 (br, s, 1H), 7.45 – 7.41 (m, 4H), 7.35 – 7.32 (m, 1H), 6.86 (t, *J* = 2.8 Hz, 1H), 6.50 (t, *J* = 2.8 Hz, 1H) 4.80 (s, 1H), 3.75 (s, 6H).

## SUPPORTING INFORMATION

**$^{13}\text{C}$ -NMR** (126 MHz,  $\text{CDCl}_3$ ):  $\delta$  = 169.6 (2C), 132.4, 131.3, 129.1 (2C), 128.0 (2C), 127.6, 118.3, 111.9, 110.6, 52.9 (2C), 49.7.

**IR** (ATR):  $\tilde{\nu}$  ( $\text{cm}^{-1}$ ) = 3375 (br), 2954 (w), 1734 (s), 1684 (w), 1440 (m), 1373 (s), 1304 (m), 1231 (m), 1147 (m), 1022 (m).

**HRMS** (ESI):  $\text{C}_{15}\text{H}_{15}\text{NO}_4$  (273.10) calcd.: 296.08933 found: 296.08919,  $[\text{M}+\text{Na}]^+$ .

## 7.2 Products from dioxane 4a

### Dimethyl 2-hydroxy-2-(3-hydroxy-3-phenylpropyl)malonate (**12**)

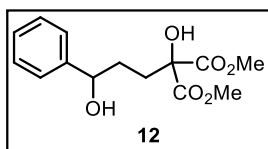

Dioxane **4a** (12 mg, 43.0  $\mu\text{mol}$ , 1.0 eq.) and Pd/C (10 wt. % loading, 0.60 mg, 6.39  $\mu\text{mol}$ , 16 mol%) were evacuated and backfilled with  $\text{H}_2$  (3 cycles) before MeOH (2 mL) was added. The reaction mixture was saturated with  $\text{H}_2$  gas for 5 min and was stirred for 17.5 h under an  $\text{H}_2$  atmosphere at rt. After filtration through a celite pad and removal of the solvents *in vacuo*, column chromatography ( $\text{SiO}_2$ , PE/EtOAc 1:1) afforded the desired product **12** (8.20 mg, 29.0  $\mu\text{mol}$ , 68%) as a colourless oil.

**$^1\text{H}$ -NMR** (500 MHz,  $\text{CDCl}_3$ ):  $\delta$  = 7.37 – 7.24 (m, 5H), 6.86 (t,  $J$  = 6.5 Hz, 1H), 3.79 (br, s, 1H), 3.80 (s, 3H), 3.78 (s, 3H), 2.30 – 2.03 (m, 3H), 1.84 – 1.76 (m, 2H), 1.62 (br, s, 1H).

**$^{13}\text{C}$ -NMR** (126 MHz,  $\text{CDCl}_3$ ):  $\delta$  = 171.0, 170.9, 144.2, 128.7 (2C), 127.8, 125.6 (2C), 79.0, 74.2, 53.6, 53.5, 32.9, 31.4.

**IR** (ATR):  $\tilde{\nu}$  ( $\text{cm}^{-1}$ ) = 3383 (br), 2954 (w), 1739 (s), 1492 (w), 1444 (m), 1270 (s), 1231 (s), 1133 (m), 1047 (m), 1022 (w).

**HRMS** (ESI):  $\text{C}_{14}\text{H}_{18}\text{O}_6$  (282.10) calcd.: 321.07350 found: 321.07352,  $[\text{M}+\text{K}]^+$ .



### 7.3 Products from $\gamma$ -hydroxy ketone 5a

#### Dimethyl (*E*)-2-hydroxy-2-(3-(hydroxyimino)-3-phenylpropyl)malonate (**13**)

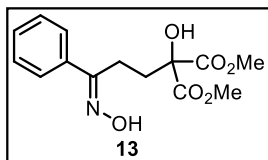

Hydroxylamine hydrochloride (27 mg, 390  $\mu$ mol, 2.0 eq.) was added to a solution of  $\gamma$ -hydroxy ketone **5a** (55 mg, 195  $\mu$ mol, 1.0 eq.) in pyridine (3 mL) and the resulting mixture was stirred for 21 h at 55 °C. After removal of pyridine *in vacuo*, H<sub>2</sub>O and EtOAc were added and the layers were separated. The aq. phase was extracted with EtOAc (2  $\times$  5 mL), the combined organic layers were washed with H<sub>2</sub>O (2  $\times$  7 mL) and aq. sat. NaCl solution (7 mL) and were dried over anhydrous Na<sub>2</sub>SO<sub>4</sub>. Removal of the solvents *in vacuo* and subsequent column chromatography (SiO<sub>2</sub>, PE/EtOAc 1:1) afforded a single isomer of oxime **13** (46.7 mg, 158  $\mu$ mol, 81%) as a white solid.

**<sup>1</sup>H-NMR** (400 MHz, CDCl<sub>3</sub>):  $\delta$  = 7.67 – 7.62 (m, 2H), 7.39 – 7.34 (m, 3H), 3.77 (br, s, 6H), 2.83 – 2.79 (m, 2H), 2.20 – 2.16 (m, 2H). No OH-signals were observed.

**<sup>13</sup>C-NMR** (101 MHz, CDCl<sub>3</sub>):  $\delta$  = 172.1 (2C), 158.5, 137.3, 129.9, 129.5 (2C), 127.2 (2C), 80.3, 53.4 (2C), 33.2, 21.1.

**IR** (ATR):  $\tilde{\nu}$  (cm<sup>-1</sup>) = 3435 (br), 2955 (w), 1737 (s), 1496 (w), 1444 (m), 1272 (s), 1234 (s), 1133 (s), 985 (m), 932 (m).

**HRMS** (ESI): C<sub>14</sub>H<sub>17</sub>NO<sub>6</sub> (295.10) calcd.: 318.09481 found: 318.09481, [M+Na]<sup>+</sup>.

**m. p.:** 131 °C

#### Methyl 3-hydroxy-2-oxo-6-phenylpiperidine-3-carboxylate (**14**)

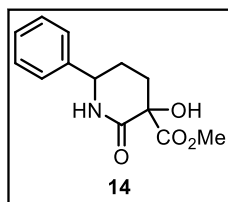

Oxime **13** (11.1 mg, 37.6  $\mu$ mol, 1.0 eq.) and Pd/C (10 wt. % loading, 1.00 mg, 9.40  $\mu$ mol, 25 mol%) were evacuated and backfilled with H<sub>2</sub> (3 cycles) before MeOH (2 mL) was added.

SUPPORTING INFORMATION

---

The reaction mixture was saturated with H<sub>2</sub> gas for 5 min and was stirred for 20 h under an H<sub>2</sub> atmosphere at rt. After filtration through a celite pad and removal of the solvents *in vacuo*, column chromatography (SiO<sub>2</sub>, PE/EtOAc 1:1) afforded the desired product **14** (7.50 mg, 26.7 μmol, 71%, *d.r.* 9:1) as a colourless oil.

**<sup>1</sup>H-NMR** (500 MHz, CDCl<sub>3</sub>): δ = 7.41 – 7.32 (m, 5H), 6.06 (br, s, 1H), 4.68 – 4.65 (m, 1H), 4.16 (br, s, 1H), 3.87 (s, 3H), 2.42 – 2.37 (m, 1H), 2.27 – 2.22 (m, 1H), 2.13 – 2.06 (m, 1H), 2.05 – 2.02 (m, 1H).

**<sup>13</sup>C-NMR** (126 MHz, CDCl<sub>3</sub>): δ = 172.4, 170.4, 141.5, 129.1 (2C), 129.5, 126.4 (2C), 74.7, 58.1, 53.4, 30.1, 28.9.

**IR** (ATR):  $\tilde{\nu}$  (cm<sup>-1</sup>) = 3270 (br), 2928 (w), 1742 (m), 1663 (s), 1446 (m), 1265 (m), 1216 (m), 1185 (s), 1126 (w), 1052 (m).

**HRMS** (ESI): C<sub>13</sub>H<sub>15</sub>NO<sub>4</sub> (249.10) calcd.: 272.08933 found: 272.08944, [M+Na]<sup>+</sup>.

## 8. Mechanistic Experiments

### 8.1 Divided cell experiments

All divided cell experiments were performed in an IKA Pro-Divide cell. In all cathodic reduction and anodic oxidation reactions, the working chamber (marked with W) was filled with starting material, supporting electrolyte solution (4.5 mL, 0.02 M) and a mediator if needed. The counter chamber (marked with C) was filled with supporting electrolyte solution (4.5 mL, 0.02 M) only. For anodic oxidations positive potentials (working electrode as anode) and for cathodic reductions (working electrode as cathode) negative potentials were applied. Exact reaction conditions are given in the following procedures.

#### **Anodic oxidation of CP 1a**

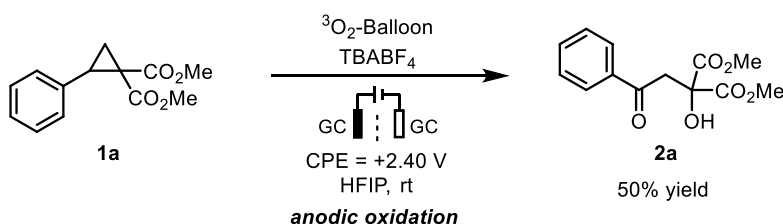

Cyclopropane **1a** (35.1 mg, 150  $\mu$ mol, 1.00 eq.) and TBABF<sub>4</sub> (0.02 M) were filled in the working chamber of an IKA Pro-Divide and were dissolved in HFIP (4.5 mL). The solution was saturated with oxygen for 5 min. The counter chamber was filled with a solution of TBABF<sub>4</sub> (0.02 M) in HFIP (4.5 mL). The solutions were electrolyzed at a glassy carbon anode and a glassy carbon cathode at a constant potential of **+2.40 V** for 22 h. The resulting mixture from the working chamber was concentrated *in vacuo* and adsorbed on silica gel. Purification by column chromatography (SiO<sub>2</sub>, PE/EtOAc 3:1) afforded **2a** (18.7 mg, 74.8  $\mu$ mol, 50%) as a white solid.

## SUPPORTING INFORMATION

**Cathodic reduction of CP 1a**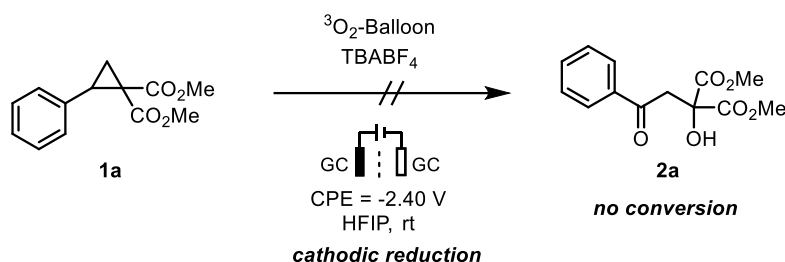

Cyclopropane **1a** (35.1 mg, 150  $\mu\text{mol}$ , 1.00 eq.) and TBABF<sub>4</sub> (0.02 M) were filled in the working chamber of an IKA Pro-Divide and were dissolved in HFIP (4.5 mL). The solution was saturated with oxygen for 5 min. The counter chamber was filled with a solution of TBABF<sub>4</sub> (0.02 M) in HFIP (4.5 mL). The solutions were electrolyzed at a glassy carbon anode and a glassy carbon cathode at a constant potential of **-2.40 V** for 3 h. No conversion of starting material **1a** was observed.

**Anodic oxidation of CB 3a**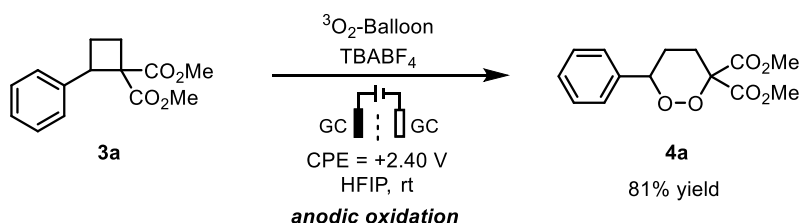

Cyclobutane **3a** (10.8 mg, 43.5  $\mu\text{mol}$ , 1.00 eq.) and TBABF<sub>4</sub> (0.02 M) were filled in the working chamber of an IKA Pro-Divide and were dissolved in HFIP (4.5 mL). The solution was saturated with oxygen for 5 min. The counter chamber was filled with a solution of TBABF<sub>4</sub> (0.02 M) in HFIP (4.5 mL). The solutions were electrolyzed at a glassy carbon anode and a glassy carbon cathode at a constant potential of **+2.40 V** for 14 h. The resulting mixture from the working chamber was concentrated *in vacuo* and adsorbed on silica gel. Purification by column chromatography (SiO<sub>2</sub>, PE/EtOAc 3:1) afforded **4a** (9.88 mg, 35.2  $\mu\text{mol}$ , 81%) as a yellow oil.

**Cathodic reduction of CB 3a**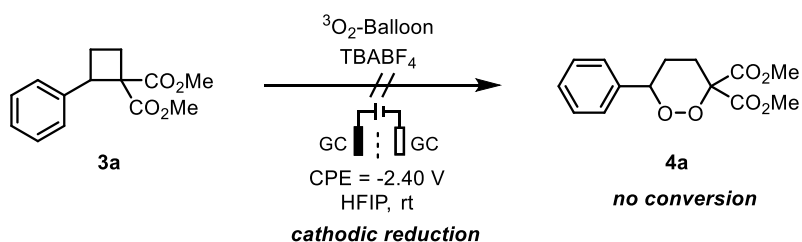

Cyclobutane **3a** (10.6 mg, 42.7  $\mu\text{mol}$ , 1.00 eq.) and TBABF<sub>4</sub> (0.02 M) were filled in the working chamber of an IKA Pro-Divide and were dissolved in HFIP (4.5 mL). The solution was saturated with oxygen for 5 min. The counter chamber was filled with a solution of TBABF<sub>4</sub> (0.02 M) in HFIP (4.5 mL). The solutions were electrolyzed at a glassy carbon anode and a glassy carbon cathode at a constant potential of **-2.40 V** for 3 h. No conversion of starting material **3a** was observed.

**8.2 Conversion of deuterated compounds and dioxolane precursors**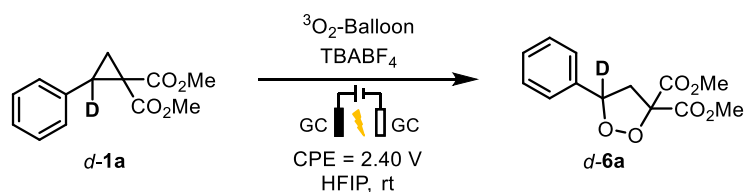

Deuterated cyclopropane **d-1a** (22.8 mg, 97.0  $\mu\text{mol}$ , 1.0 eq.) was reacted for 16 h according to **GP2-A**. Column chromatography (SiO<sub>2</sub>, PE/EtOAc 4:1) afforded the desired product **d-6a** (10 mg, 37.8  $\mu\text{mol}$ , 39%) as a colourless oil.

**<sup>1</sup>H-NMR** (500 MHz, CDCl<sub>3</sub>):  $\delta$  = 7.42 – 7.33 (m, 5H), 3.88 (s, 3H), 3.86 (s, 3H), 3.54 (d,  $J$  = 12.9 Hz, 1H), 3.29 (d,  $J$  = 12.9 Hz, 1H).

**<sup>13</sup>C-NMR** (126 MHz, CDCl<sub>3</sub>):  $\delta$  = 167.2, 167.0, 135.0, 129.3, 129.9 (2C), 127.4 (2C), 88.3, 83.5 (t,  $J$  = 22.4 Hz, 1C), 53.8, 53.7, 49.5.

**IR** (ATR):  $\tilde{\nu}$  (cm<sup>-1</sup>) = 2957 (w), 2853 (w), 1745 (s), 1494 (w), 1442 (m), 1280 (s), 1202 (m), 1082 (m), 1000 (w), 756 (m).

**HRMS** (GC/EI): C<sub>13</sub>H<sub>13</sub>DO<sub>6</sub> (267.08) calcd.: 267.08531 found: 267.08535.

## SUPPORTING INFORMATION

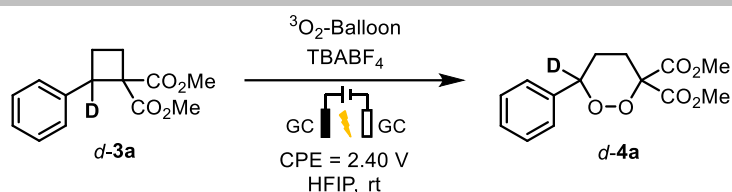

Deuterated cyclobutane **d-3a** (19.5 mg, 78.0  $\mu\text{mol}$ , 1.0 eq.) was reacted for 15.5 h according to **GP3**. Column chromatography (SiO<sub>2</sub>, PE/EtOAc 4:1) afforded the desired product **d-4a** (17.9 mg, 63.2  $\mu\text{mol}$ , 81%) as a yellow oil.

**<sup>1</sup>H-NMR** (400 MHz, CDCl<sub>3</sub>):  $\delta$  = 7.36 – 7.28 (m, 5H), 3.88 (s, 3H), 3.83 (s, 3H), 2.74 (ddd,  $J$  = 13.4, 4.7, 2.6 Hz, 1H), 2.41 – 2.32 (m, 1H), 2.18 (ddd,  $J$  = 13.4, 12.3, 5.0 Hz, 1H), 2.08 – 2.01 (m, 1H).

**<sup>13</sup>C-NMR** (126 MHz, CDCl<sub>3</sub>):  $\delta$  = 167.3, 166.8, 137.2, 129.2, 128.7 (2C), 127.5 (2C), 85.7, 82.7 (t,  $J$  = 22.6 Hz, 1C), 53.5, 53.4, 28.2, 26.4.

**IR** (ATR):  $\tilde{\nu}$  (cm<sup>-1</sup>) = 2954 (w), 2854 (w), 1746 (s), 1495 (w), 1440 (m), 1263 (s), 1217 (m), 1068 (m), 1007 (m), 734 (s).

**HRMS** (ESI): C<sub>14</sub>H<sub>15</sub>DO<sub>6</sub> (281.10) calcd.: 304.09019 found: 304.09023, [M+Na]<sup>+</sup>.

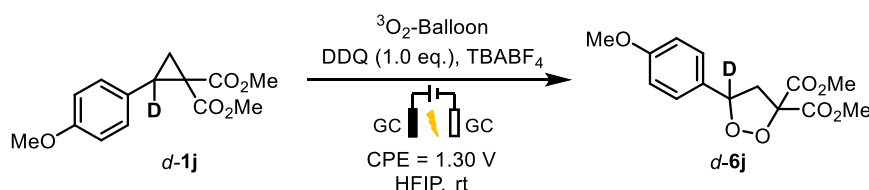

Deuterated cyclopropane **d-1j** (26.9 mg, 102  $\mu\text{mol}$ , 1.0 eq.), DDQ (23.3 mg, 103  $\mu\text{mol}$ , 1.01 eq.) and additional H<sub>2</sub>O (18 mg, 18  $\mu\text{L}$ , 1.00 mmol, 10.0 eq.) were provided with 3.90 F/mol and reacted according to **GP2-B**. Column chromatography (SiO<sub>2</sub>, PE/EtOAc 4:1) afforded the desired product **d-1j** (21.4 mg, 72.0  $\mu\text{mol}$ , 71%) as a colourless oil.

**<sup>1</sup>H-NMR** (500 MHz, CDCl<sub>3</sub>):  $\delta$  = 7.35 – 7.32 (m, 2H), 6.91 – 6.88 (m, 2H), 3.87 (s, 3H), 3.87 (s, 3H), 3.80 (s, 3H), 3.45 (d,  $J$  = 12.9 Hz, 1H), 3.29 (d,  $J$  = 12.9 Hz, 1H).

**<sup>13</sup>C-NMR** (126 MHz, CDCl<sub>3</sub>):  $\delta$  = 168.1, 167.0, 160.5, 129.2 (2C), 126.1, 114.4 (2C), 88.4, 83.5 (t,  $J$  = 23.4 Hz, 1C), 55.5, 53.8, 53.8, 49.1.

**IR** (ATR):  $\tilde{\nu}$  (cm<sup>-1</sup>) = 2925 (w), 2849 (w), 1745 (s), 1514 (w), 1445 (m), 1249 (s), 1184 (m), 1088 (m), 1029 (w), 726 (m).

## SUPPORTING INFORMATION

**HRMS** (ESI): C<sub>14</sub>H<sub>15</sub>DO<sub>7</sub> (297.09) calcd.: 336.05904 found: 336.05903.

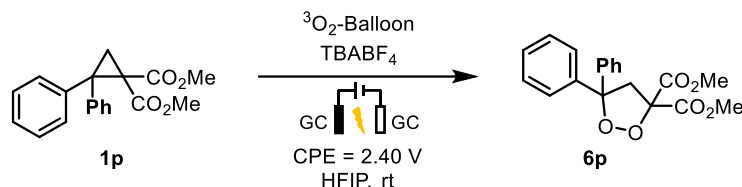

Cyclopropane **1p** (100 mg, 322  $\mu$ mol, 1.0 eq.) was reacted for 17 h according to **GP2-A**. Column chromatography (SiO<sub>2</sub>, PE/EtOAc 10:1) afforded the desired product **6p** (36.6 mg, 107  $\mu$ mol, 33%) as a white solid.

**<sup>1</sup>H-NMR** (600 MHz, CDCl<sub>3</sub>):  $\delta$  = 7.41 – 7.39 (m, 4H), 7.35 – 7.32 (m, 4H), 7.29 – 7.27 (m, 2H), 3.96 (s, 2H), 3.70 (s, 3H).

**<sup>13</sup>C-NMR** (151 MHz, CDCl<sub>3</sub>):  $\delta$  = 167.4 (2C), 140.3 (2C), 128.6 (4C), 128.3 (2C), 126.8 (4C), 91.8, 88.6, 54.2, 53.7 (2C).

**IR** (ATR):  $\tilde{\nu}$  (cm<sup>-1</sup>) = 2955 (w), 2854 (w), 1749 (s), 1493 (w), 1443 (m), 1277 (s), 1168 (m), 1070 (m), 755 (m), 700 (m).

**HRMS** (ESI): C<sub>19</sub>H<sub>18</sub>O<sub>6</sub> (342.11) calcd.: 365.09956 found: 365.09956, [M+Na]<sup>+</sup>.

**m. p.:** 91 °C

### 8.3 Chain propagation experiments

All chain propagation experiments were performed according to **GP2-A** for cyclopropane **1a** and according to **GP2-B** for cyclopropane **1j** in scales of 150  $\mu$ mol. In order to separate supporting electrolyte from the reaction mixtures, the crude material was pressed through a SiO<sub>2</sub> pad flushing with pentane/ethyl acetate (1:1, 350 mL). All conversion were determined by <sup>1</sup>H-NMR spectroscopy after removal of TBABF<sub>4</sub> salt. Table S1 shows the results from the time/charge-based conversion of the phenyl cyclopropane **1a** (**GP2-A**). The given theoretical charge value is the amount of coulombs that are needed to reach the observed conversion in a stoichiometric process.

## SUPPORTING INFORMATION

**Table S1.** Charge-based conversions of **1a** to **2a**.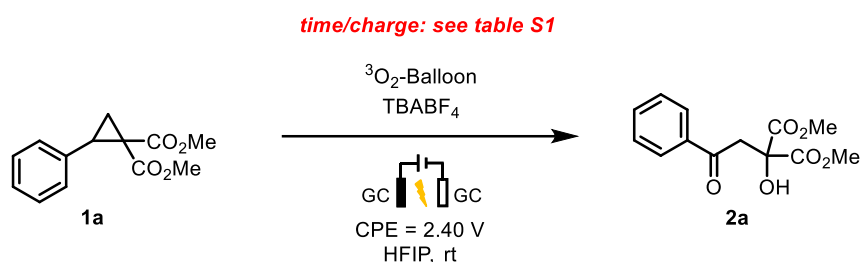

| Entry | Charge Q<br>[F per mol <b>1a</b> ] | Charge Q<br>[C] | <i>t</i><br>[min] | observed conv.<br>[ $\mu$ mol] (%) | theoretical<br>conv.<br>[ $\mu$ mol] (%) | theoretical charge<br>for observed conv.<br>[C] |
|-------|------------------------------------|-----------------|-------------------|------------------------------------|------------------------------------------|-------------------------------------------------|
| 1     | 0                                  | 0               | 0                 | 0                                  | 0                                        | 0                                               |
| 2     | 0.004                              | 0.058           | 10                | 34.5 (23)                          | 0.60 (0.04)                              | 3.33                                            |
| 3     | 0.05                               | 0.72            | 120               | 144 (96)                           | 7.50 (5)                                 | 13.90                                           |
| 4     | <b>0.1</b>                         | <b>1.45</b>     | <b>240</b>        | <b>150 (100)</b>                   | <b>15 (10)</b>                           | <b>14.48</b>                                    |
| 5     | 0.3                                | 4.34            | 720               | 150 (100)                          | 45 (30)                                  | 14.48                                           |
| 6     | 0.5                                | 7.24            | 1200              | 150 (100)                          | 75 (50)                                  | 14.48                                           |
| 7     | 1.0                                | 14.48           | 2400              | 150 (100)                          | 150 (100)                                | 14.48                                           |

Since the time-based experiments for the conversion of cyclopropane **1a** gave clear indication (see table S1, entry 3 and 4) for chain propagation, cyclobutane **3a** and cyclopropane **1j** were reacted under standard conditions (**GP3** for **3a** and **GP2-B** for **1j**). A total charge of 0.3 F/mol **1j/3a** was provided. Also for these reactions a conversion of 100% was observed, indicating that the mediated mechanism is also proceeding via chain propagation.

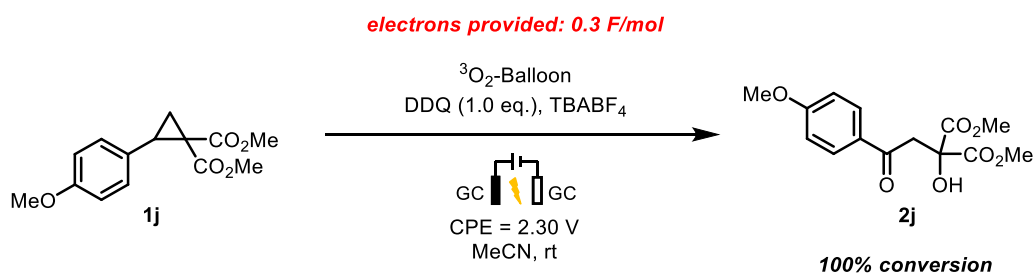**Scheme S6.** Charge-based experiment for cyclopropane **1j**. A total charge of 0.3 F/mol of **1j** was provided.



## SUPPORTING INFORMATION

8.4 Intermediate trapping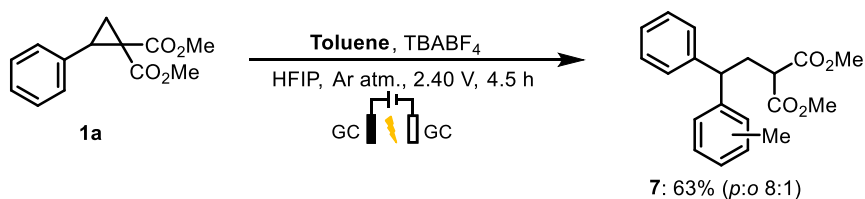

In a 5 mL ElectraSyn vial cyclopropane **1a** (24.32 mg, 103  $\mu\text{mol}$ , 1.00 eq.) and  $\text{TBABF}_4$  (0.03 M) were dissolved in HFIP (4.5 mL; degassed, stored over molecular sieves) and the solution was saturated with argon for 5 minutes. The solution was electrolyzed at a glassy carbon anode and a glassy carbon cathode at a constant potential of +2.40 V for 4.5 h. The reaction mixture was concentrated *in vacuo* and the remaining residue was adsorbed on silica gel. Purification by column chromatography ( $\text{SiO}_2$ , PE/EtOAc 20:1) afforded **7** (21.4 mg, 64.9  $\mu\text{mol}$ , 63%; *p:o* 8:1) as a colourless oil.

**$^1\text{H-NMR}$**  (400 MHz,  $\text{CDCl}_3$ ):  $\delta$  = 7.30 – 7.26 (m, 2H), 7.24 – 7.22 (m, 2H), 7.20 – 7.16 (m, 1H), 7.13 – 7.08 (m, 4H), 3.91 (t,  $J$  = 8.1 Hz, 1H), 3.70 (s, 6H), 3.91 (t,  $J$  = 7.4 Hz, 1H), 2.67 – 2.64 (m, 2H), 2.30 (s, 3H).

**$^{13}\text{C-NMR}$**  (101 MHz,  $\text{CDCl}_3$ ):  $\delta$  = 169.9, 169.9, 143.7, 140.4, 136.3, 129.5 (2C), 128.7(2C), 127.9 (2C), 127.9 (2C), 126.6, 52.7 (2C), 50.2, 48.4, 34.6, 21.1.

**IR** (ATR):  $\tilde{\nu}$  ( $\text{cm}^{-1}$ ) = 2953 (w), 1739 (s), 1504 (w), 1442 (m), 1340 (w), 1279 (m), 1230 (m), 1153 (s), 1018 (m), 703 (m).

**HRMS** (ESI):  $\text{C}_{20}\text{H}_{22}\text{O}_4$  (326.15) calcd.: 349.14103 found: 349.14116,  $[\text{M}+\text{Na}]^+$ .

## SUPPORTING INFORMATION

## 8.5 Inhibition experiments

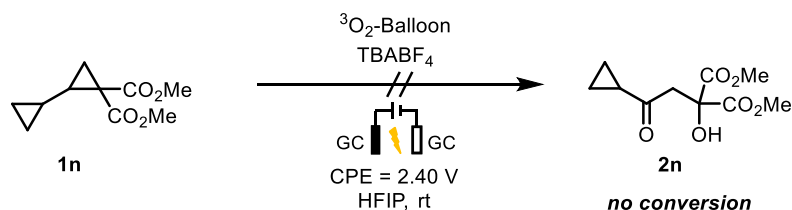

Cyclopropane **1n** (29.7 mg, 150  $\mu\text{mol}$ , 1.0 eq.) was reacted according to **GP2-A** or **GP2-B**. No conversion of the starting material was observed for either reaction after electrolyzing the solution overnight.

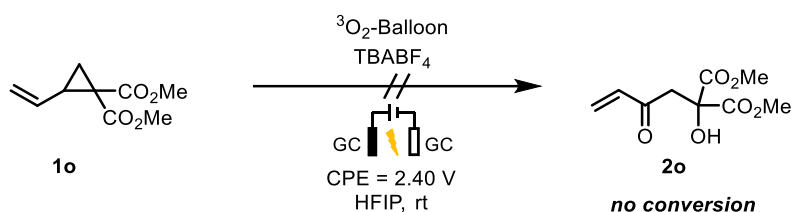

Cyclopropane **1o** (27.6 mg, 150  $\mu\text{mol}$ , 1.0 eq.) was reacted according to **GP2-A** or **GP2-B**. No conversion of the starting material was observed for either reaction after electrolyzing the solution overnight.

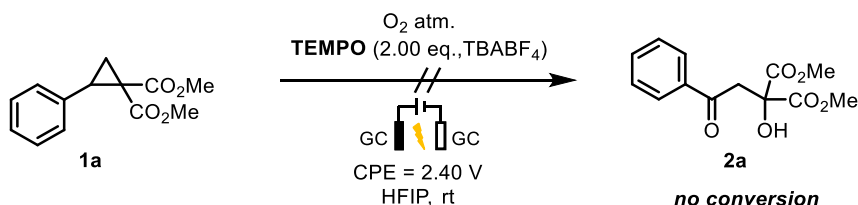

In a 5 mL ElectraSyn vial Cyclopropane **1a** (24.5 mg, 105  $\mu\text{mol}$ , 1.0 eq.), TBABF<sub>4</sub> (0.02 M) and TEMPO (33.2 mg, 213  $\mu\text{mol}$ , 2.03 eq.) were dissolved in HFIP (4.5 mL) and the resulting solution was left open to air. The reaction mixture was electrolyzed at a glassy carbon anode and a glassy carbon cathode at a constant potential of +2.40 V for 16 h. No conversion of the starting material was observed after reacting for 16 h.

## SUPPORTING INFORMATION

## 9. Cyclic Voltammetry

The cyclic voltammograms shown in Fig. 1S were recorded using the following conditions:  $\nu = 100$  mV/S,  $c$  (cyclopropane) = 0.01 M,  $c$  (supporting electrolyte TBABF<sub>4</sub>) = 0.1 M in HFIP or MeCN (stored over molecular sieves and under argon atmosphere).

Ferrocene was added as an internal standard and oxidation potentials were calculated using the local maxima or the points of inflection respectively and are corrected against Fc/Fc<sup>+</sup>.

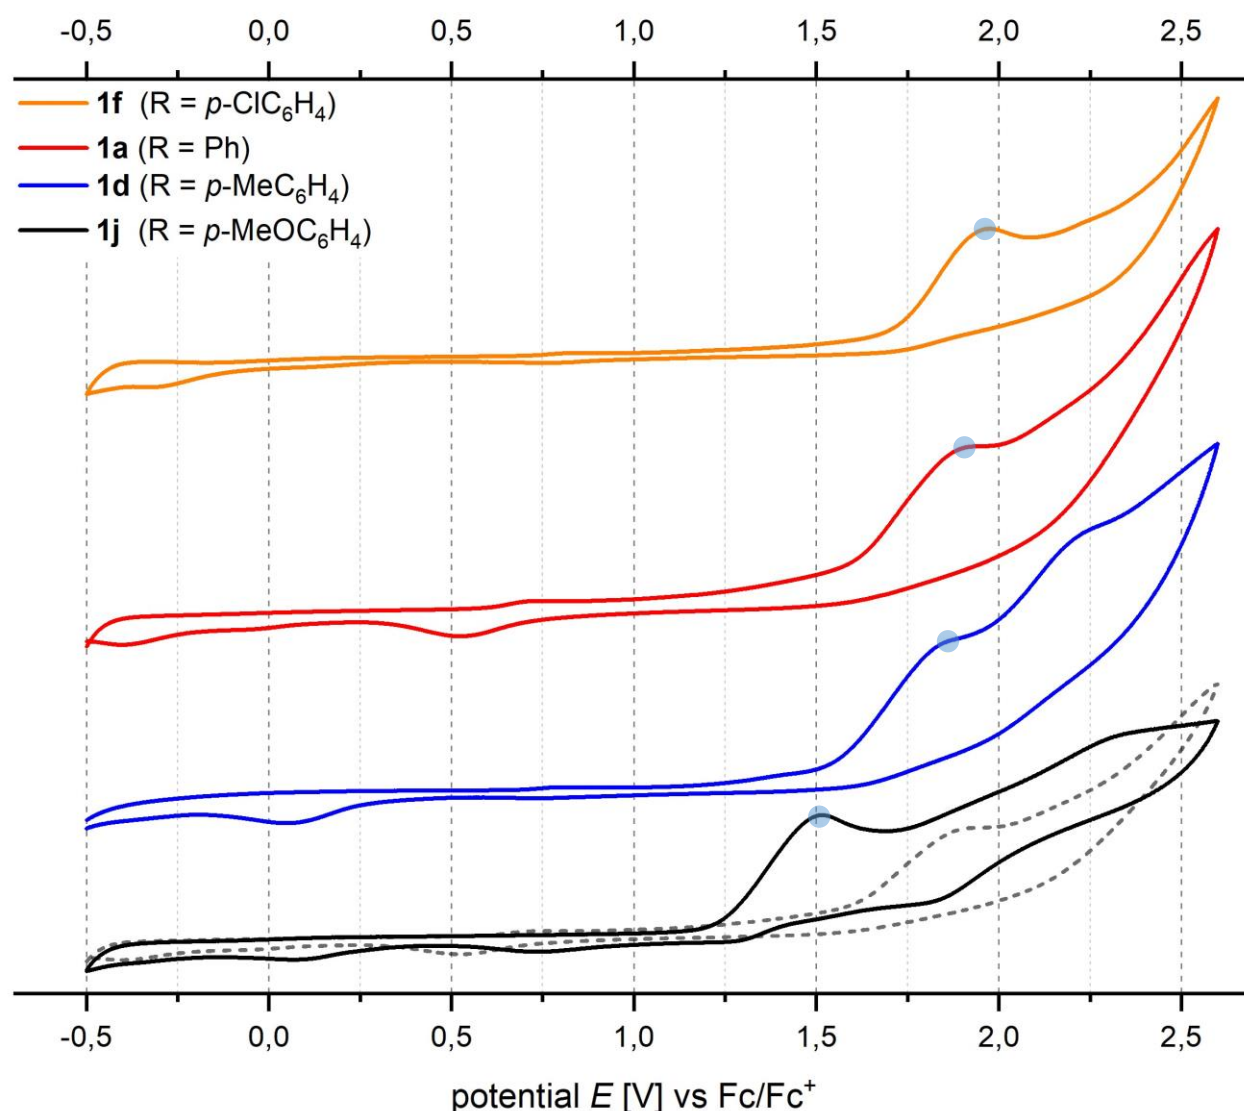

**Fig. S1.** Cyclic voltammograms for **1fa** (orange), **1a** (red), **1d** (blue), **1j** (black) in HFIP and for **1j** (dashed grey) in MeCN. The depicted voltammograms were obtained using a silver wire reference electrode and are not corrected against the Fc/Fc<sup>+</sup> values.

The cyclic voltammograms give evidence that an irreversible oxidation of cyclopropanes **1** takes place. Since electron-rich arene donors should be easier to oxidize, we expected the

## SUPPORTING INFORMATION

oxidation potentials to shift significantly for different cyclopropanes. As shown in Fig. S1 and table S2 the received data ( $E_{\text{ox},1/2}$  ranging from 1.80 – 1.13V) is in accordance with our expectations.

**Table S2.** Oxidation potentials ( $E_{1/2}$  and  $E_{\text{max}}$ ) for **1a**, **1f**, **1d** and **1j** derived from cyclic voltammogram data and corrected against Fc/Fc<sup>+</sup> values.

| Oxidation potentials<br>corrected against<br>Fc/Fc <sup>+</sup> | <b>1f</b><br>( <i>p</i> -ClC <sub>6</sub> H <sub>4</sub> ) | <b>1a</b><br>(Ph) | <b>1d</b><br>( <i>p</i> -MeC <sub>6</sub> H <sub>4</sub> ) | <b>1j</b><br>( <i>p</i> -OMeC <sub>6</sub> H <sub>4</sub> in<br>HFIP) | <b>1j</b><br>( <i>p</i> -OMeC <sub>6</sub> H <sub>4</sub> in<br>MeCN) |
|-----------------------------------------------------------------|------------------------------------------------------------|-------------------|------------------------------------------------------------|-----------------------------------------------------------------------|-----------------------------------------------------------------------|
| $E_{\text{max}}$ [V]                                            | 1.80                                                       | 1.79              | 1.74                                                       | 1.41                                                                  | 1.13                                                                  |
| $E_{1/2}$ [V]                                                   | 1.67                                                       | 1.65              | 1.55                                                       | 1.37                                                                  | 0.95                                                                  |

## 10. Computational Data

### 10.1 DFT Calculations

Geometry optimizations of intermediates and Nudged Elastic Band (NEB) calculations for finding the minimum energy path and the saddle point between two minimum structures were performed with ORCA 4.2.1<sup>[16]</sup> using density-functional theory (DFT) with the TPSSh functional<sup>[17]</sup> and a def2-TZVP basis set<sup>[18]</sup>. The conductor-like polarizable continuum model (CPCM)<sup>[19]</sup> was applied to add implicit solvent. HFIP was used for direct electrolysis ( $\epsilon = 6.7$ ;  $r = 3.47$ ) and acetonitrile for mediated electrolysis ( $\epsilon = 36.6$ ;  $r = 2.75$ ).

Frequency calculations were performed for each stationary point to confirm that it is a local minimum or first-order saddle point, respectively. NEB was performed using the climbing image method<sup>[20]</sup> and 15 intermediate images. Shown enthalpies consist of the electronic energy, the zero point energy, thermal vibrational, rotational and translational corrections and a thermal enthalpy correction as provided by ORCA for  $T = 298.15$  K.

Löwdin charges<sup>[21]</sup> were evaluated to investigate charge distributions within the molecule. For this, the molecule is split into three parts (Fig. S2) and the atomic partial Löwdin charges are summed up for each part to then evaluate the contribution to the total charge deviation compared to the neutral reactant.

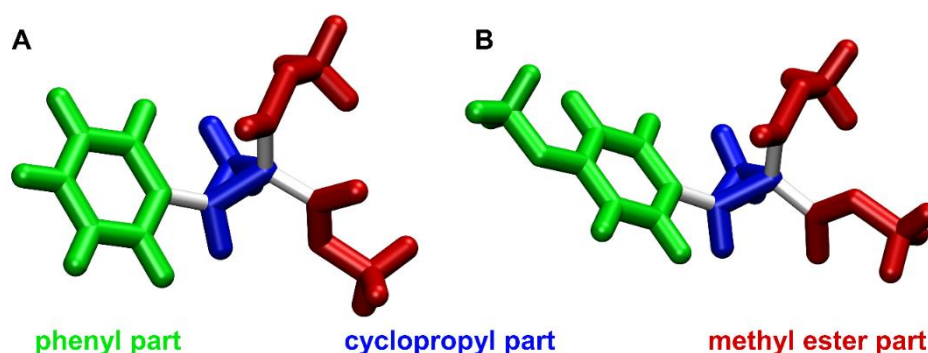

**Fig S2.** Molecule partitioning for the evaluation of the contribution to the total charge deviation for the direct electrolysis with reactant **1a** (A) and mediated electrolysis with intermediate **1j** (B).

## 10.2 Supplementary tunneling calculations

After purification dioxolane **6a** by column chromatography the isomerized species **2a** is isolated which results from a ring-opening due to hydrogen transfer. Starting from the deuterated species, this isomerization is not observed and product **6a** is isolated. The very high reaction barrier of 51.33 kcal/mol obtained in the quantum-chemical calculations is an indicator for a possible hydrogen tunneling mechanism through this barrier.

Regarding the dioxane species, here the closed-ring product **4a** represents the isolated product after purification for both the hydrogenated and deuterated species. In this case, a hydrogen transfer and the resulting acyclic isomer **5a** can only be achieved by NEt<sub>3</sub>-assisted isomerization with an again high calculated activation barrier of 53.56 kcal/mol.

To get evidence for the hypothesis that tunneling might play a role for this reaction step we applied the Wentzel-Kramers-Brillouin approach (WKB) approximation<sup>[22]</sup> as described in the review by Kästner<sup>[23]</sup>, which provides the tunneling probability through a potential barrier for certain tunneling energies,

$$\kappa(E_{pt}) = \frac{1}{1 + e^{2\theta(E_{pt})/\hbar}}$$

where the barrier penetration integral is given by

$$\theta(E_{pt}) = \int_{r_a}^{r_b} \sqrt{2m(V(r) - E_{pt})} dr$$

The tunneling pre-tunneling energy  $E_{pt}$  has to be reached in the so-called pre-tunneling state which represents a molecular configuration favorable for tunneling.<sup>[24]</sup>

To calculate these tunneling probabilities, the reaction barriers **6a** → **2a** (dioxolane) and **4a** → **5a** (1,2-dioxane) were fitted with a 10<sup>th</sup> order polynomial (Fig. S3). Note that we only considered the minimum energy paths obtained from the NEB calculations and did not attempt to find the most likely tunneling path.<sup>[23]</sup> Both barriers share a similar height but the dioxane barrier is broader. This is also reflected when looking at the calculated tunneling probabilities with different pre-tunneling energies (Fig. S4). Because of the barrier width for the dioxane much higher pre-tunneling energies have to be reached to achieve a reasonable tunneling probability compared to the dioxolane species.

## SUPPORTING INFORMATION

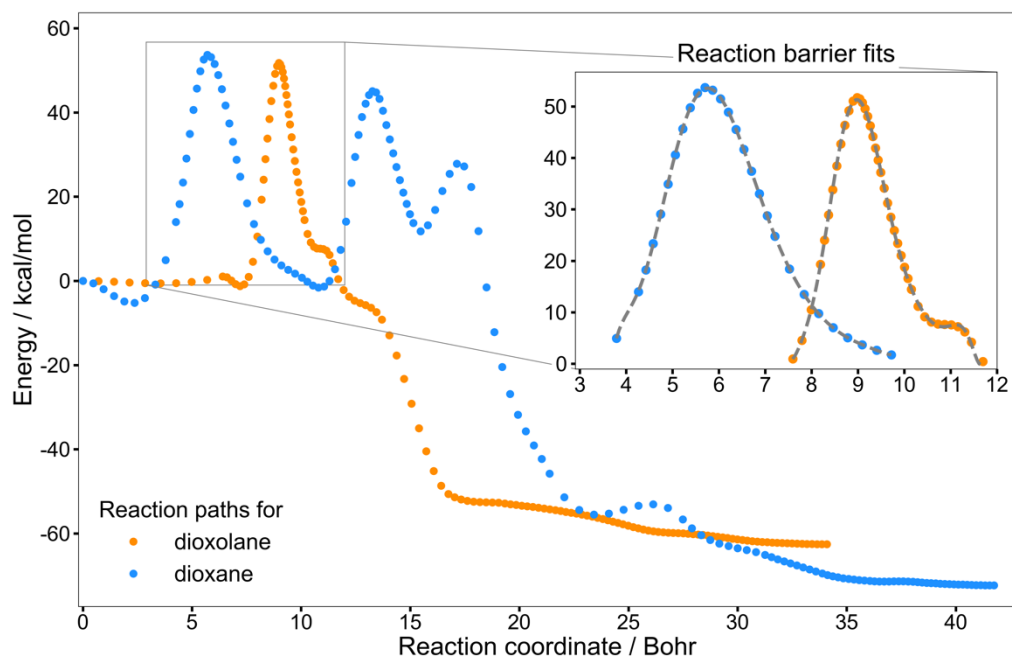

**Fig. S3.** Minimum energy paths for reaction step F gained from NEB calculations with ORCA for the dioxolane (orange) and the dioxane (blue). Box shows the main reaction barriers with polynomial fits.

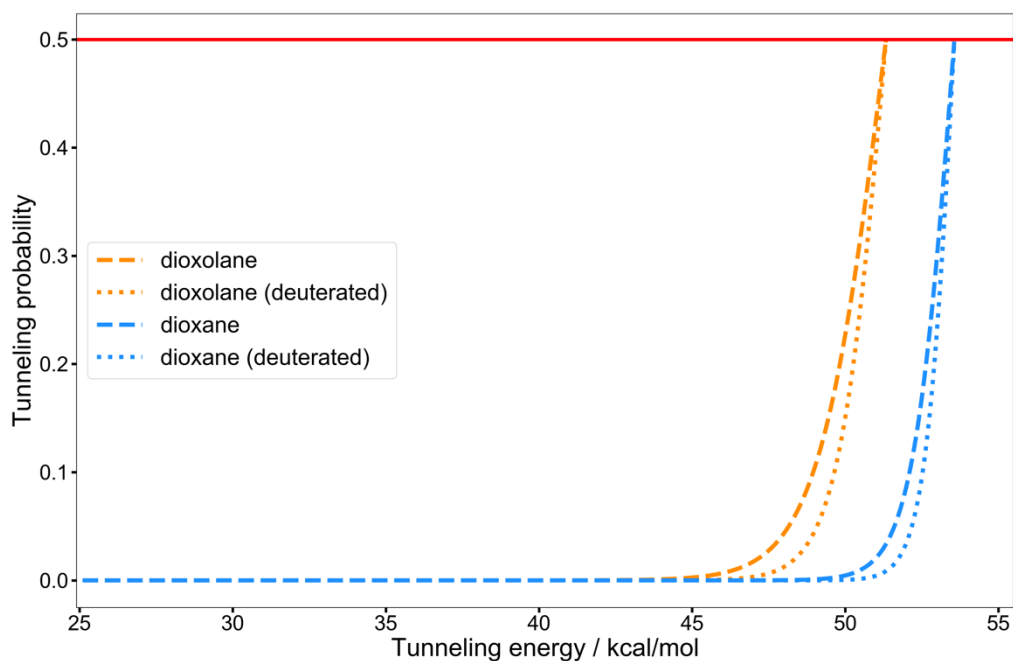

**Fig. S4.** Tunneling probabilities calculated via WKB approximation for the reaction barriers of the hydrogenated and deuterated dioxolane (orange) and dioxane (blue) species. Maximum tunneling probability 0.5 in the WKB approach indicating the maximum of the reaction barrier is marked by a red line.

## SUPPORTING INFORMATION

To make a statement about the possibility of tunneling in this special case, we employ the following simple model: First, we assume that a pre-tunneling state is thermally populated, i.e., the rate at which the pre-tunneling energy  $E_{pt}$  is reached can be calculated as

$$k_1 = A \cdot e^{-\frac{E_{pt}}{RT}},$$

where the pre-exponential factor  $A$  for calculation of reaction rates was set to  $10^{12.6} \text{ s}^{-1}$ ,<sup>[25]</sup>  $R$  is the ideal gas constant and  $T$  is the temperature (298.15 K). To calculate the overall reaction rate for a given pre-tunneling energy  $E_{pt}$ ,  $k_1$  is multiplied by the tunneling probability  $\kappa$ . Figure S5 plots the resulting overall reaction rates as functions of the pre-tunneling energy.

The maxima of these curves indicate the pre-tunneling energy that yield the largest overall reaction rate when tunneling is considered, whereas the end points of the curves (corresponding to a tunneling energy that is equal to the barrier height) are the reaction rates that are obtained if no tunneling is considered. Simply speaking, the lower the pre-tunneling energy at the maximum, the larger is the overall importance of tunneling for the considered reaction.

For the hydrogenated dioxolane species **6a** an optimal pre-tunneling energy of about 15 kcal/mol is found, for which tunneling increases the overall reaction rate by 9 orders of magnitude. However, this optimal pre-tunneling energy for the deuterated species is much higher with about 28 kcal/mol, with an overall reaction rate that is six orders of magnitude smaller than for the non-deuterated species. This is consistent with the observation that such an isomerization is not found in experiment. For the dioxane **4a**, already in the hydrogenated case the optimal pre-tunneling energy is at approximately 40 kcal/mol, and tunneling only leads to an approximately 8-fold increase of the overall reaction rate. For the deuterated dioxane, the optimal pre-tunneling energy is almost as large as the overall barrier height, i.e., tunneling is not possible in this case.

While we are well aware for the limitations of the simple model we have applied here, the results indicate that a hydrogen tunneling mechanism for the isomerization while purification seems reasonable.

All plots were prepared in Jupyter notebooks using Python and Matplotlib.<sup>[26]</sup>



## SUPPORTING INFORMATION

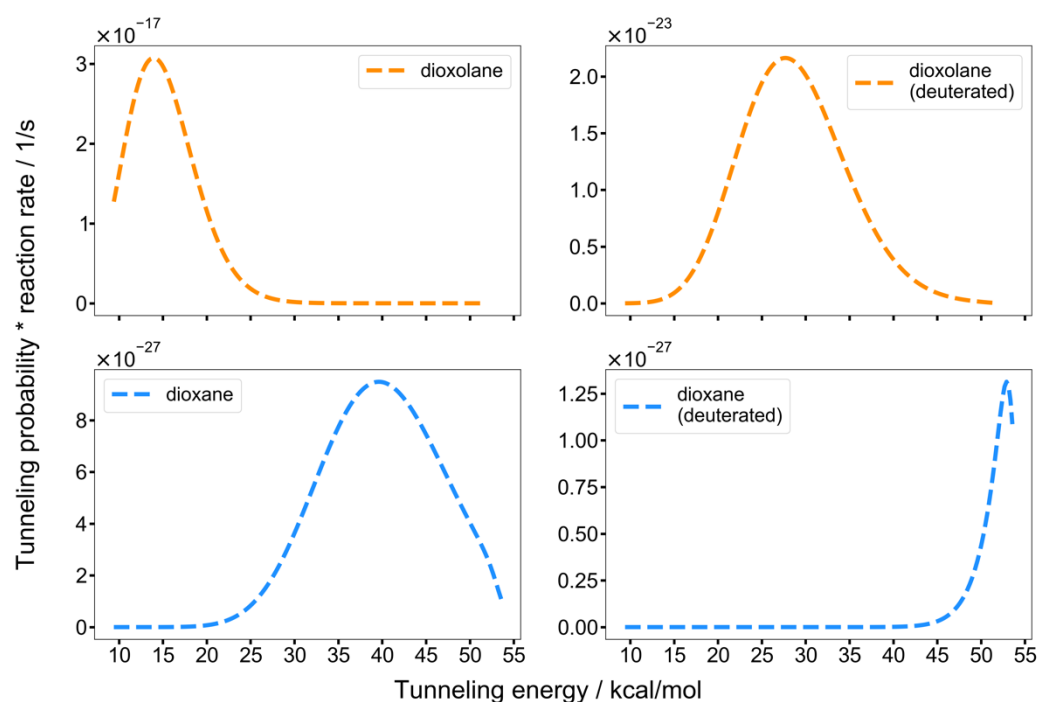

**Fig. S5.** Reaction rates weighted by tunneling probabilities for hydrogenated and deuterated dioxolane (orange) and dioxane (blue) species. Maxima indicate minimum energy to be reached before tunneling to achieve a positive effect on the reaction rate by hydrogen tunneling.

### 10.3 Provided files

Coordinates of the optimized intermediates are provided in .xyz files named after the given numbers.

#### xyz-Coordinates for 1a

|   |                   |                   |                   |
|---|-------------------|-------------------|-------------------|
| C | -3.37640338717252 | -0.15040480550470 | 0.33396507818104  |
| C | -4.70097445601874 | 0.19156731972175  | 0.62043355777160  |
| C | -5.46033582353314 | -0.57848828037825 | 1.49576205539050  |
| C | -4.91106485203786 | -1.70971115743943 | 2.09442247909406  |
| C | -3.59537935989556 | -2.06615455798706 | 1.80811862165150  |
| C | -2.83694851657493 | -1.29224680163305 | 0.93574862455708  |
| H | -5.15649494467438 | 1.06196632828853  | 0.16153217246655  |
| H | -6.48599329003432 | -0.29623140884633 | 1.70526494078247  |
| H | -5.50547470365820 | -2.31133428138735 | 2.77313791820399  |
| H | -3.15919481802873 | -2.94898760277114 | 2.26187017184151  |
| H | -1.81360418677733 | -1.57656238560884 | 0.71442103291421  |
| C | -2.51898378618634 | 0.62218471050201  | -0.60882395683315 |
| C | -2.09417171130215 | 2.08955601012934  | -0.34463633645425 |
| H | -2.05594636994308 | 4.74726030349741  | -0.92347332498442 |

## SUPPORTING INFORMATION

|   |                   |                  |                   |
|---|-------------------|------------------|-------------------|
| C | -0.67963814056258 | 2.45689227979577 | -0.64192102897572 |
| O | -0.02222398140786 | 3.20546590286192 | 0.05885856454376  |
| O | -0.21665113278601 | 1.87724473396295 | -1.75354107670983 |
| C | 1.16208409172464  | 2.17183223561320 | -2.09837197659485 |
| C | -2.60370872620606 | 2.80077983774140 | 0.88972252005778  |
| O | -2.57462752436692 | 2.31153837193169 | 1.99572895381345  |
| O | -3.10402889538539 | 4.04215406951986 | 0.75165346093673  |
| C | -3.06476969744154 | 4.74868506226432 | -0.51415372077427 |
| H | -1.70445901152876 | 0.04318967274774 | -1.02737136527175 |
| H | -2.63960434023355 | 1.80522550806773 | -2.48522316841481 |
| H | -3.77226540246864 | 4.31325372282322 | -1.21782047923951 |
| H | -4.06413495551448 | 2.01142025434413 | -1.36257636434706 |
| H | -3.36152501470002 | 5.76554414419953 | -0.27072336924199 |
| H | 1.27784689565304  | 3.24146465594011 | -2.26777614382251 |
| H | 1.34721132434258  | 1.61070373753164 | -3.00963491357068 |
| H | 1.82031928294114  | 1.84312033636465 | -1.29547881781945 |
| C | -3.02849240622223 | 1.71681004370720 | -1.47958977915197 |

xyz-Coordinates for intermediate I

|   |           |           |           |
|---|-----------|-----------|-----------|
| C | -3.326409 | -0.149837 | 0.342385  |
| C | -4.620295 | 0.296751  | 0.765485  |
| C | -5.367050 | -0.467516 | 1.621057  |
| C | -4.856165 | -1.695499 | 2.090811  |
| C | -3.584661 | -2.159267 | 1.679945  |
| C | -2.835628 | -1.405892 | 0.817267  |
| H | -5.020718 | 1.231194  | 0.397081  |
| H | -6.347558 | -0.138054 | 1.937471  |
| H | -5.448378 | -2.294918 | 2.772093  |
| H | -3.214831 | -3.105927 | 2.050793  |
| H | -1.861093 | -1.742596 | 0.487615  |
| C | -2.497111 | 0.579636  | -0.584972 |
| C | -2.177304 | 2.118456  | -0.392944 |
| H | -1.990877 | 4.903429  | -0.848124 |
| C | -0.737743 | 2.487486  | -0.651657 |
| O | -0.156256 | 3.289409  | 0.049366  |
| O | -0.229208 | 1.861880  | -1.701224 |
| C | 1.162817  | 2.158579  | -2.021374 |
| C | -2.733767 | 2.821453  | 0.839435  |
| O | -2.813697 | 2.281775  | 1.918663  |
| O | -3.142772 | 4.081787  | 0.696472  |

SUPPORTING INFORMATION

---

|   |           |          |           |
|---|-----------|----------|-----------|
| C | -3.036432 | 4.804651 | -0.563098 |
| H | -1.638294 | 0.040415 | -0.960531 |
| H | -2.630835 | 1.667364 | -2.503742 |
| H | -3.617930 | 4.309174 | -1.338008 |
| H | -4.107331 | 1.870867 | -1.432976 |
| H | -3.457342 | 5.782000 | -0.347950 |
| H | 1.262024  | 3.219072 | -2.244797 |
| H | 1.379251  | 1.549674 | -2.893253 |
| H | 1.792244  | 1.881544 | -1.177592 |
| C | -3.046288 | 1.670650 | -1.504174 |

xyz-Coordinates for intermediate II

|   |           |           |           |
|---|-----------|-----------|-----------|
| C | -3.314332 | -0.237635 | 0.662208  |
| C | -4.668810 | 0.146235  | 0.416787  |
| C | -5.688618 | -0.524658 | 1.045394  |
| C | -5.392356 | -1.580840 | 1.923242  |
| C | -4.074206 | -1.974846 | 2.185444  |
| C | -3.040669 | -1.311280 | 1.567997  |
| H | -4.887702 | 0.960973  | -0.260171 |
| H | -6.719544 | -0.246342 | 0.869632  |
| H | -6.207070 | -2.103223 | 2.411537  |
| H | -3.877593 | -2.792082 | 2.866962  |
| H | -2.009814 | -1.591990 | 1.748458  |
| C | -2.232130 | 0.361745  | 0.041731  |
| C | -1.300365 | 2.547480  | -0.605044 |
| H | -3.083430 | 5.292687  | 1.730583  |
| C | 0.157918  | 2.376159  | -0.746187 |
| O | 0.999865  | 3.162744  | -0.359787 |
| O | 0.439993  | 1.201315  | -1.337158 |
| C | 1.849801  | 0.905227  | -1.512984 |
| C | -1.843617 | 3.825933  | -0.098018 |
| O | -1.284550 | 4.900229  | -0.189105 |
| O | -3.055836 | 3.646934  | 0.447091  |
| C | -3.701157 | 4.845381  | 0.952977  |
| H | -1.246503 | -0.007353 | 0.313783  |
| H | -1.867580 | 0.962577  | -1.898315 |
| H | -3.851114 | 5.550512  | 0.136485  |
| C | -2.249612 | 1.433437  | -0.978911 |
| H | -4.650432 | 4.504294  | 1.355385  |
| H | 2.303479  | 1.661770  | -2.152033 |

SUPPORTING INFORMATION

---

|   |           |           |           |
|---|-----------|-----------|-----------|
| H | 1.873544  | -0.071918 | -1.986443 |
| H | 2.343605  | 0.884892  | -0.542307 |
| H | -3.245675 | 1.819807  | -1.172891 |

xyz-Coordinates for intermediate III

|   |           |           |           |
|---|-----------|-----------|-----------|
| C | -3.368585 | -0.697229 | 1.132526  |
| C | -4.731259 | -0.340098 | 1.386234  |
| C | -5.579684 | -1.261223 | 1.946322  |
| C | -5.101751 | -2.542426 | 2.273988  |
| C | -3.771852 | -2.917907 | 2.042195  |
| C | -2.909661 | -2.010671 | 1.476028  |
| H | -5.091562 | 0.648196  | 1.134864  |
| H | -6.613487 | -1.008752 | 2.141770  |
| H | -5.782525 | -3.258257 | 2.720482  |
| H | -3.434572 | -3.910999 | 2.307265  |
| H | -1.876019 | -2.268689 | 1.279949  |
| C | -2.454560 | 0.161284  | 0.554204  |
| C | -1.547235 | 2.508881  | 0.392421  |
| H | -3.442803 | 6.028028  | -0.433902 |
| C | -0.205280 | 2.026272  | -0.189889 |
| O | 0.553574  | 1.309628  | 0.417063  |
| O | -0.057372 | 2.471882  | -1.425412 |
| C | 1.161262  | 2.059276  | -2.119458 |
| C | -1.830037 | 3.972450  | -0.016197 |
| O | -1.152035 | 4.886040  | 0.386978  |
| O | -2.866480 | 4.061647  | -0.832932 |
| C | -3.207357 | 5.403764  | -1.293885 |
| H | -1.450620 | -0.232442 | 0.411206  |
| H | -2.781934 | 1.471204  | -1.023126 |
| H | -2.367905 | 5.816750  | -1.850348 |
| C | -2.700269 | 1.536138  | 0.072599  |
| H | -4.075044 | 5.264077  | -1.930941 |
| H | 2.023563  | 2.442852  | -1.578052 |
| H | 1.080514  | 2.506280  | -3.104369 |
| H | 1.190469  | 0.972866  | -2.176206 |
| H | -3.633996 | 1.957775  | 0.437530  |
| O | -2.353497 | 3.008125  | 2.488138  |
| O | -1.318708 | 2.500476  | 1.849331  |

## SUPPORTING INFORMATION

xyz-Coordinates for intermediate IV

|   |           |           |           |
|---|-----------|-----------|-----------|
| C | -3.131731 | -0.589312 | 1.206753  |
| C | -4.018628 | 0.082519  | 2.086844  |
| C | -5.024786 | -0.619995 | 2.720485  |
| C | -5.146777 | -1.994091 | 2.500423  |
| C | -4.254516 | -2.669323 | 1.642253  |
| C | -3.239288 | -1.975141 | 1.015268  |
| H | -3.907660 | 1.145915  | 2.263190  |
| H | -5.708832 | -0.111737 | 3.387660  |
| H | -5.929886 | -2.552464 | 2.999001  |
| H | -4.371025 | -3.733230 | 1.478381  |
| H | -2.542963 | -2.483639 | 0.359607  |
| C | -2.065750 | 0.181239  | 0.505880  |
| C | -1.596960 | 2.498620  | 0.084414  |
| H | -4.235360 | 5.494616  | -0.667086 |
| C | -0.229519 | 2.590846  | -0.648018 |
| O | 0.301799  | 3.646455  | -0.887971 |
| O | 0.242622  | 1.385794  | -0.908017 |
| C | 1.565890  | 1.330571  | -1.526536 |
| C | -2.276511 | 3.877183  | 0.095051  |
| O | -2.401595 | 4.557699  | 1.081896  |
| O | -2.700241 | 4.154562  | -1.125745 |
| C | -3.352236 | 5.448199  | -1.301400 |
| H | -1.351756 | -0.470941 | 0.003898  |
| H | -2.371358 | 1.123043  | -1.430744 |
| H | -2.650467 | 6.239359  | -1.044229 |
| C | -2.505672 | 1.351428  | -0.376945 |
| H | -3.618161 | 5.482060  | -2.352910 |
| H | 1.529858  | 1.840585  | -2.486996 |
| H | 1.769821  | 0.271634  | -1.647127 |
| H | 2.287854  | 1.801817  | -0.862575 |
| H | -3.548847 | 1.610083  | -0.198940 |
| O | -1.293108 | 0.805750  | 1.604078  |
| O | -1.316265 | 2.187895  | 1.471025  |

xyz-Coordinates for 6a

|   |                   |                   |                    |
|---|-------------------|-------------------|--------------------|
| C | -4.40798366907674 | -1.42352228868840 | -0.40732987511894  |
| C | -5.46059554375528 | -2.33583120333868 | -0.31195966120103  |
| C | -5.24668770860204 | -3.69418365336482 | -0.534827444464333 |
| C | -3.97430329398176 | -4.15189549003084 | -0.86492206395870  |

## SUPPORTING INFORMATION

|   |                   |                   |                   |
|---|-------------------|-------------------|-------------------|
| C | -2.91763451823248 | -3.24765815776514 | -0.96301153970403 |
| C | -3.12994961884115 | -1.89308507392199 | -0.72966597096804 |
| H | -6.45482266160590 | -1.97986846320280 | -0.06090244275215 |
| H | -6.07319961666119 | -4.39139072981625 | -0.45405137790257 |
| H | -3.80443289574360 | -5.20786621340215 | -1.04413132103413 |
| H | -1.92501706969382 | -3.60012706593060 | -1.22048623679706 |
| H | -2.30165500849907 | -1.19784429750226 | -0.80961141326463 |
| C | -4.68852175889029 | 0.04468244496582  | -0.20290829268494 |
| O | -0.75350519510591 | 1.08531400823328  | -0.54466668443957 |
| C | -3.05101792961734 | 1.81504016150447  | -0.26982852716715 |
| C | -1.52793112918537 | 1.87518507297612  | -0.06047299143855 |
| C | -3.66125928918466 | 3.23632084294374  | -0.27942525174777 |
| O | -1.20682477616151 | 2.87417585428843  | 0.75527906037185  |
| O | -4.25636553080654 | 3.55178825496274  | 0.86789296350777  |
| C | 0.20510908560277  | 2.99518679836442  | 1.09051720483593  |
| C | -4.82811177463649 | 4.88644547068697  | 0.94028596466133  |
| H | -2.94880945569974 | 0.13181077438209  | 1.11332537114796  |
| O | -3.58620991543737 | 3.96459731622427  | -1.24275430987595 |
| H | -5.60002592908238 | 4.99295756124540  | 0.17963600779993  |
| H | -4.04438053535555 | 5.62776290000892  | 0.79119261940633  |
| H | -5.24965719248194 | 4.95639198128278  | 1.93863587980270  |
| H | 0.54035577190993  | 2.08329570028400  | 1.58228740399711  |
| H | 0.25923285211422  | 3.84666759774162  | 1.76216774539640  |
| H | 0.77863111708844  | 3.17162645051229  | 0.18232974211703  |
| O | -3.25133173878984 | 1.23098897511635  | -1.55074293940305 |
| C | -3.70062085623187 | 0.80635623716179  | 0.70634848532155  |
| H | -4.20189949243354 | 1.30992866465579  | 1.52764520627859  |
| O | -4.63857527709876 | 0.78111050006735  | -1.46091575582251 |
| H | -5.71956580582305 | 0.18289154935524  | 0.12719905527964  |

xyz-Coordinates for 2a

|   |                   |                   |                   |
|---|-------------------|-------------------|-------------------|
| C | -4.08203840644541 | -1.39359496803499 | -0.75889816268480 |
| C | -3.65132794768051 | -2.11839692438026 | 0.35965914573214  |
| C | -4.08974665609194 | -3.42276070802365 | 0.56104804803956  |
| C | -4.95571921820406 | -4.01606430400975 | -0.35433302407180 |
| C | -5.38860890359507 | -3.30174708159487 | -1.47241185667521 |
| C | -4.95700087469552 | -1.99851975008650 | -1.67183135534265 |
| H | -2.97786300089237 | -1.67213776649007 | 1.08086805529006  |
| H | -3.75398858252298 | -3.97591760485100 | 1.43041437226840  |
| H | -5.29339597124229 | -5.03440964224967 | -0.19809797236970 |
| H | -6.06145994392867 | -3.76452386850310 | -2.18510024159988 |

## SUPPORTING INFORMATION

|   |                   |                   |                   |
|---|-------------------|-------------------|-------------------|
| H | -5.28650741241933 | -1.43190275761985 | -2.53425638235080 |
| C | -3.64739538668248 | 0.00737460058595  | -1.01171497037377 |
| O | -0.05236390722958 | 2.99594775629513  | 0.17102600343128  |
| C | -2.09730718570915 | 1.96657769973228  | -0.57043083130749 |
| C | -1.16221670382594 | 2.60988139927397  | 0.47862482512526  |
| C | -3.20656834118015 | 3.00574232269936  | -0.88446548586658 |
| O | -1.69603869884559 | 2.69621358858371  | 1.68468536867094  |
| O | -4.20103140455541 | 2.94638216371879  | 0.00126644765307  |
| C | -0.86797267340472 | 3.31364401534215  | 2.71087083105682  |
| C | -5.26894899037072 | 3.90965586612144  | -0.18386299528277 |
| H | -0.52576878652590 | 2.27215598354302  | -1.63197975862204 |
| O | -3.12712584496480 | 3.81167933104879  | -1.78204955436662 |
| H | -5.74259746381675 | 3.74889650417752  | -1.15164148816069 |
| H | -4.86860293522324 | 4.92111439442153  | -0.12492411921349 |
| H | -5.96608806703688 | 3.71828114960469  | 0.62688006430080  |
| H | 0.04248054357925  | 2.73087743212373  | 2.84073146067484  |
| H | -1.47768296040578 | 3.29435339489797  | 3.60893345088936  |
| H | -0.62857232734785 | 4.33468659824578  | 2.41848298922841  |
| O | -1.33361160501774 | 1.73437386819758  | -1.72641437688158 |
| C | -2.65368125871493 | 0.63773117517582  | -0.04909793612652 |
| H | -3.14678699789313 | 0.78262371803927  | 0.91501314155296  |
| O | -4.08595886416582 | 0.64730526211565  | -1.95663196292331 |
| H | -1.81327852294446 | -0.04086336810044 | 0.11426205030579  |

xyz-Coordinates for 1j

|   |           |           |           |
|---|-----------|-----------|-----------|
| C | -2.974057 | -0.480146 | 0.152398  |
| C | -4.365592 | -0.533544 | 0.181474  |
| C | -5.051198 | -1.251115 | 1.161535  |
| C | -4.333652 | -1.940804 | 2.138119  |
| C | -2.933462 | -1.906847 | 2.118685  |
| C | -2.271856 | -1.187150 | 1.139019  |
| H | -4.948968 | -0.023670 | -0.576922 |
| H | -6.133181 | -1.270930 | 1.144545  |
| O | -4.904120 | -2.675495 | 3.135827  |
| H | -2.382057 | -2.451412 | 2.876899  |
| H | -1.186356 | -1.172318 | 1.136686  |
| C | -2.213857 | 0.254039  | -0.898299 |
| C | -1.968787 | 1.782033  | -0.831411 |
| H | -2.413886 | 4.214178  | -1.817464 |
| C | -0.615940 | 2.204873  | -1.297655 |
| O | -0.002047 | 1.663444  | -2.195101 |

SUPPORTING INFORMATION

---

|   |           |           |           |
|---|-----------|-----------|-----------|
| O | -0.160956 | 3.259658  | -0.606591 |
| C | 1.148436  | 3.758702  | -0.987119 |
| C | -2.549320 | 2.576360  | 0.313727  |
| O | -2.413820 | 2.258094  | 1.474696  |
| O | -3.245262 | 3.696104  | 0.041070  |
| C | -3.374519 | 4.215724  | -1.305935 |
| H | -1.327244 | -0.260371 | -1.253993 |
| H | -2.476422 | 1.167282  | -2.903212 |
| H | -4.111000 | 3.639210  | -1.863343 |
| H | -3.920040 | 1.340117  | -1.793914 |
| H | -3.721511 | 5.237589  | -1.175245 |
| H | 1.897403  | 2.985564  | -0.820910 |
| H | 1.320206  | 4.614021  | -0.340294 |
| H | 1.137692  | 4.056930  | -2.034477 |
| C | -2.857979 | 1.153165  | -1.890412 |
| C | -6.335295 | -2.748825 | 3.170921  |
| H | -6.722349 | -3.206045 | 2.256302  |
| H | -6.772031 | -1.755367 | 3.302526  |
| H | -6.573616 | -3.375014 | 4.028053  |

xyz-Coordinates for intermediate V

|   |           |           |           |
|---|-----------|-----------|-----------|
| C | -3.371889 | 0.023348  | 0.947878  |
| C | -4.416634 | -0.065527 | 1.874026  |
| C | -5.159822 | -1.228935 | 2.011618  |
| C | -4.857915 | -2.347394 | 1.227523  |
| C | -3.818748 | -2.278886 | 0.296493  |
| C | -3.094667 | -1.096134 | 0.162142  |
| H | -4.649629 | 0.788067  | 2.503101  |
| H | -5.968550 | -1.291537 | 2.731274  |
| O | -5.624176 | -3.456520 | 1.440932  |
| H | -3.567547 | -3.130939 | -0.321390 |
| H | -2.288623 | -1.058869 | -0.563026 |
| C | -2.545546 | 1.274910  | 0.839370  |
| C | -1.541148 | 3.010146  | -0.763372 |
| H | -2.414294 | 5.905166  | 1.837433  |
| C | -0.362063 | 2.751421  | -1.542246 |
| O | 0.567388  | 3.517854  | -1.805821 |
| O | -0.341953 | 1.466418  | -2.042863 |
| C | 0.815041  | 1.130223  | -2.819847 |
| C | -1.733443 | 4.315231  | -0.196562 |
| O | -1.000649 | 5.304155  | -0.255192 |



SUPPORTING INFORMATION

---

|   |           |           |           |
|---|-----------|-----------|-----------|
| O | -2.925528 | 4.391628  | 0.493006  |
| C | -3.194914 | 5.655235  | 1.117101  |
| H | -2.848154 | 2.008831  | 1.588896  |
| H | -2.459141 | 1.167338  | -1.316687 |
| H | -3.264647 | 6.449886  | 0.371864  |
| H | -3.585149 | 2.364651  | -0.670170 |
| H | -4.150573 | 5.529096  | 1.623030  |
| H | 0.910349  | 1.790631  | -3.683275 |
| H | 0.655171  | 0.103747  | -3.145384 |
| H | 1.721198  | 1.197453  | -2.214669 |
| C | -2.578844 | 1.948704  | -0.568086 |
| C | -5.315182 | -4.634687 | 0.685292  |
| H | -4.292248 | -4.965347 | 0.884731  |
| H | -5.445565 | -4.455901 | -0.385422 |
| H | -6.021051 | -5.390154 | 1.023590  |
| O | -1.183305 | 0.903888  | 1.126605  |
| O | -0.457550 | 2.048900  | 1.345522  |

xyz-Coordinates for intermediate VI

|   |           |           |           |
|---|-----------|-----------|-----------|
| C | -3.231505 | -0.243041 | 0.042250  |
| C | -4.603911 | 0.140302  | 0.106180  |
| C | -5.537809 | -0.620815 | 0.777873  |
| C | -5.163411 | -1.807729 | 1.428070  |
| C | -3.824894 | -2.217643 | 1.390798  |
| C | -2.890510 | -1.450395 | 0.714464  |
| H | -4.924402 | 1.057574  | -0.371681 |
| H | -6.577087 | -0.311300 | 0.817382  |
| O | -6.163445 | -2.488171 | 2.066641  |
| H | -3.509965 | -3.128702 | 1.883271  |
| H | -1.856883 | -1.782343 | 0.692362  |
| C | -2.237203 | 0.492573  | -0.639205 |
| C | -1.526931 | 2.897229  | -0.884922 |
| H | -3.414842 | 4.520594  | 2.237503  |
| C | -0.169372 | 2.977967  | -1.292647 |
| O | 0.706938  | 3.800471  | -0.985282 |
| O | 0.166151  | 1.948415  | -2.170831 |
| C | 1.520361  | 1.951699  | -2.632978 |
| C | -2.038180 | 3.841341  | 0.045789  |
| O | -1.473200 | 4.810052  | 0.575607  |
| O | -3.370444 | 3.596038  | 0.364202  |
| C | -3.958100 | 4.514612  | 1.290511  |

SUPPORTING INFORMATION

---

|   |           |           |           |
|---|-----------|-----------|-----------|
| H | -1.224834 | 0.097014  | -0.602858 |
| H | -2.162607 | 1.586147  | -2.458682 |
| H | -3.974810 | 5.528396  | 0.883784  |
| H | -3.453690 | 2.089334  | -1.382304 |
| H | -4.976163 | 4.158910  | 1.444800  |
| H | 1.747029  | 2.865978  | -3.186174 |
| H | 1.603957  | 1.087664  | -3.291755 |
| H | 2.220389  | 1.856056  | -1.800253 |
| C | -2.412892 | 1.768989  | -1.406268 |
| C | -5.812374 | -3.697194 | 2.749442  |
| H | -5.086371 | -3.498695 | 3.542688  |
| H | -5.406019 | -4.434584 | 2.051805  |
| H | -6.739559 | -4.068703 | 3.180634  |

xyz-Coordinates for intermediate VII

|   |           |           |           |
|---|-----------|-----------|-----------|
| C | -3.308869 | -0.204033 | 1.191462  |
| C | -4.641590 | -0.026919 | 1.571186  |
| C | -5.551544 | -1.075670 | 1.521770  |
| C | -5.136330 | -2.339437 | 1.093810  |
| C | -3.806191 | -2.537290 | 0.715281  |
| C | -2.910434 | -1.470921 | 0.768926  |
| H | -4.975488 | 0.946742  | 1.916916  |
| H | -6.583765 | -0.932368 | 1.821818  |
| O | -6.092447 | -3.318691 | 1.085762  |
| H | -3.461309 | -3.508226 | 0.384571  |
| H | -1.875888 | -1.635805 | 0.488749  |
| C | -2.313465 | 0.956589  | 1.256860  |
| C | -0.868682 | 2.527263  | 0.007677  |
| H | -3.505829 | 5.307368  | 1.492172  |
| C | -0.264361 | 2.981454  | -1.344398 |
| O | 0.146963  | 4.107164  | -1.555539 |
| O | -0.137466 | 1.976412  | -2.218150 |
| C | 0.575020  | 2.286641  | -3.441918 |
| C | -1.474830 | 3.806079  | 0.656162  |
| O | -1.060750 | 4.336933  | 1.663028  |
| O | -2.535150 | 4.262291  | -0.033591 |
| C | -3.153103 | 5.468900  | 0.473952  |
| H | -2.823649 | 1.783754  | 1.789608  |
| H | -1.532542 | 0.622936  | -0.724834 |
| H | -2.434781 | 6.288742  | 0.455430  |
| H | -2.846110 | 1.823701  | -0.688009 |

## SUPPORTING INFORMATION

|   |           |           |           |
|---|-----------|-----------|-----------|
| H | -3.985129 | 5.668149  | -0.196128 |
| H | 0.056547  | 3.077106  | -3.983705 |
| H | 0.573001  | 1.360870  | -4.011696 |
| H | 1.593472  | 2.596485  | -3.208998 |
| C | -1.963858 | 1.451299  | -0.160727 |
| C | -5.692725 | -4.633207 | 0.681183  |
| H | -4.915215 | -5.024455 | 1.343313  |
| H | -5.333019 | -4.631294 | -0.351226 |
| H | -6.588101 | -5.246872 | 0.759092  |
| O | -1.162625 | 0.557922  | 1.900196  |
| O | 0.180242  | 2.036480  | 0.717414  |

xyz-Coordinates for 6j

|   |                   |                   |                   |
|---|-------------------|-------------------|-------------------|
| C | -3.44553870218367 | -0.19960059124812 | 1.20570690088133  |
| C | -4.34696122530827 | -0.52078395074136 | 2.22623116675234  |
| C | -5.01591223107486 | -1.73464343602622 | 2.23350387906706  |
| C | -4.78011291643903 | -2.66757898582610 | 1.21727701500917  |
| C | -3.87760852238910 | -2.36435651832273 | 0.19284761500456  |
| C | -3.22404438983543 | -1.13568888990565 | 0.19532403478414  |
| H | -4.52675991135906 | 0.19020703099255  | 3.02612286918343  |
| H | -5.71601949503733 | -1.98006607035437 | 3.02386258188494  |
| O | -5.46694941842036 | -3.83876774793853 | 1.30824114191986  |
| H | -3.67879021576411 | -3.07212181639575 | -0.60104582980746 |
| H | -2.52210377893733 | -0.91937681619951 | -0.60257051431611 |
| C | -2.71277748086081 | 1.11192990671065  | 1.24726427933083  |
| C | -1.41250599596251 | 2.76138953512538  | 0.10613014242177  |
| H | -3.13375336722797 | 6.38806278685016  | 0.81831680695608  |
| C | -0.49188822947832 | 2.74007075455959  | -1.12846854832965 |
| O | 0.28739909823708  | 3.63611075264740  | -1.37788837458821 |
| O | -0.58943458404871 | 1.60372628843329  | -1.80842046611848 |
| C | 0.34444612850042  | 1.43425789284473  | -2.90981627852299 |
| C | -1.60362565056488 | 4.22145453102577  | 0.55288763223907  |
| O | -1.19895562314046 | 4.68142456635473  | 1.59436556587144  |
| O | -2.29233165685190 | 4.89087971582696  | -0.36802457511596 |
| C | -2.53729368900111 | 6.29655038557224  | -0.08835087898694 |
| H | -3.02585338031770 | 1.68870252564233  | 2.12289547029018  |
| H | -2.73707787531689 | 1.37381606297471  | -0.90772233168549 |
| H | -1.58754359775080 | 6.81646986377662  | 0.02605267572222  |
| H | -3.60144035931283 | 2.65021879864571  | -0.03153457867987 |
| H | -3.08250080699939 | 6.66215737054721  | -0.95357838771038 |
| H | 0.19015895215798  | 2.22460284782959  | -3.64298195977061 |

## SUPPORTING INFORMATION

|   |                   |                   |                   |
|---|-------------------|-------------------|-------------------|
| H | 0.10819147632907  | 0.46039085255971  | -3.32833714090079 |
| H | 1.36437643790533  | 1.46074561663200  | -2.52896553845339 |
| C | -2.73984196562784 | 1.98571278623602  | -0.00866213230688 |
| C | -5.23140655673752 | -4.83511945987734 | 0.30237746044222  |
| H | -4.18122899070939 | -5.13749513430920 | 0.29787747569857  |
| H | -5.51818742861418 | -4.46398196094131 | -0.68443055846049 |
| H | -5.85950427478043 | -5.67880528021220 | 0.57925447087352  |
| O | -1.30381518658080 | 0.80985503759136  | 1.37400106446574  |
| O | -0.66280511649672 | 2.10574217891965  | 1.15767420495524  |

**10.4 Energies from DFT calculations****Table S3.** Calculated enthalpies and electronic energies.

| Compound                         | Enthalpy [kcal/mol] | Electronic energy [Hartree] |
|----------------------------------|---------------------|-----------------------------|
| <b>1a</b>                        | -505004.1           | -805.051                    |
| <b>1j</b>                        | -576880.6           | -919.629                    |
| <b>2a</b>                        | -599462.9           | -955.593                    |
| <b>6a</b>                        | -599400.7           | -955.495                    |
| <b>6j</b>                        | -671278.4           | -1070.073                   |
| <b>I</b>                         | -504856.8           | -804.815                    |
| <b>II</b>                        | -504860.7           | -804.822                    |
| <b>III</b>                       | -599236.3           | -955.231                    |
| <b>IV</b>                        | -599236.3           | -955.254                    |
| <b>V</b>                         | -576953.7           | -919.741                    |
| <b>VI</b>                        | -671342.3           | -1069.869                   |
| <b>VII</b>                       | -671371.2           | -1070.219                   |
| <b><sup>3</sup>O<sub>2</sub></b> | -94366.0            | -150.391                    |

## 11. NMR Data for Synthesized Compounds

$^1\text{H}$ ,  $^{13}\text{C}$  and  $^{19}\text{F}$  spectra of compounds that have not been reported in the literature are shown in this chapter. All spectra are marked with the corresponding molecule structure, the frequency and the used deuterated solvent.

## SUPPORTING INFORMATION

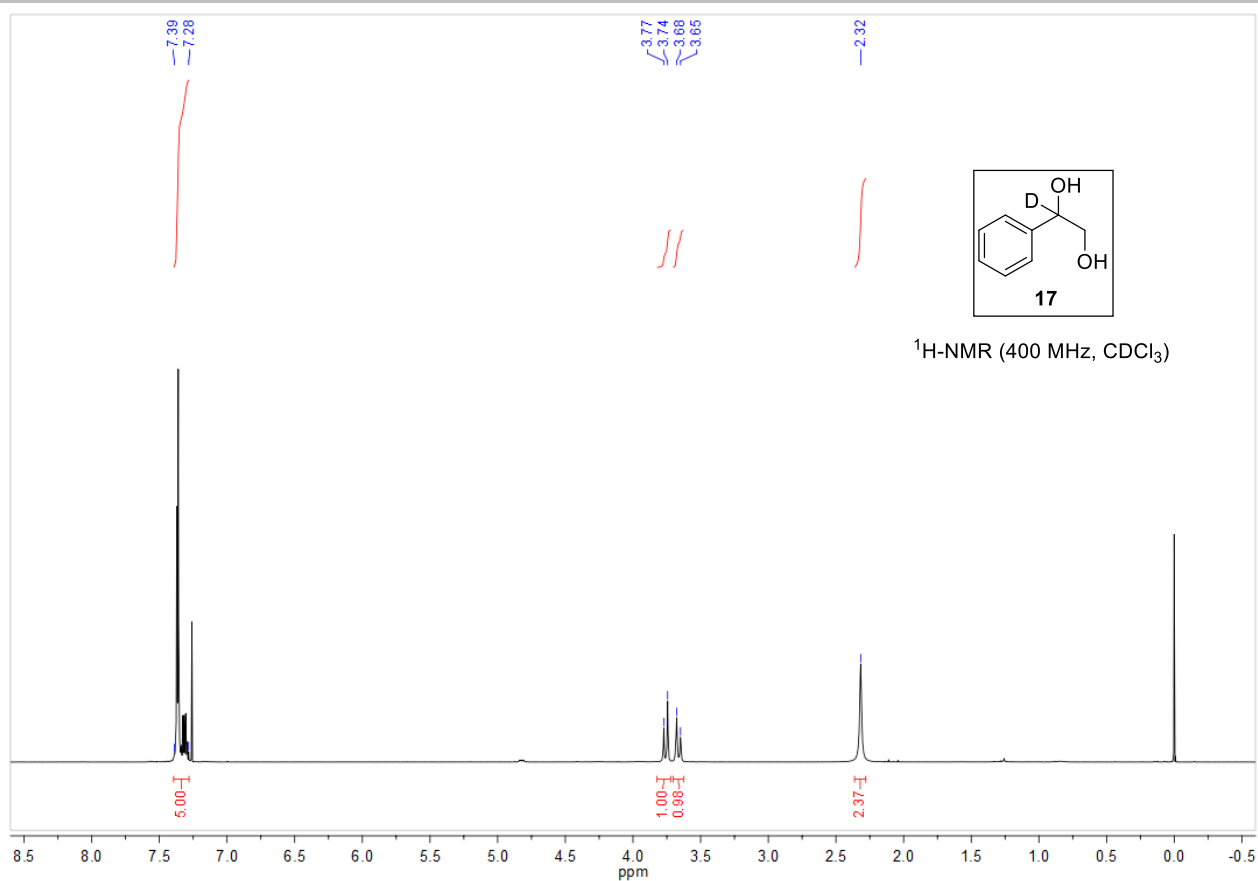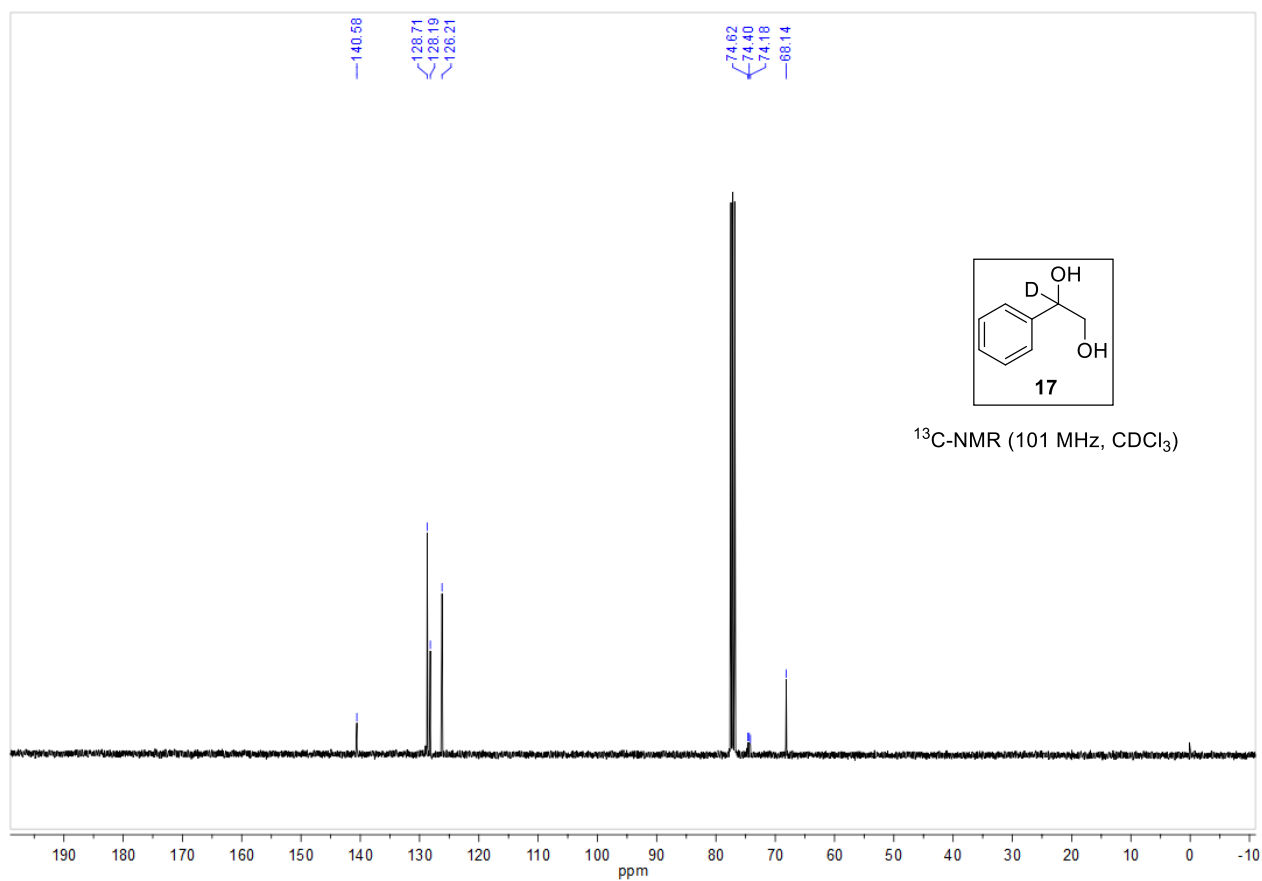

## SUPPORTING INFORMATION

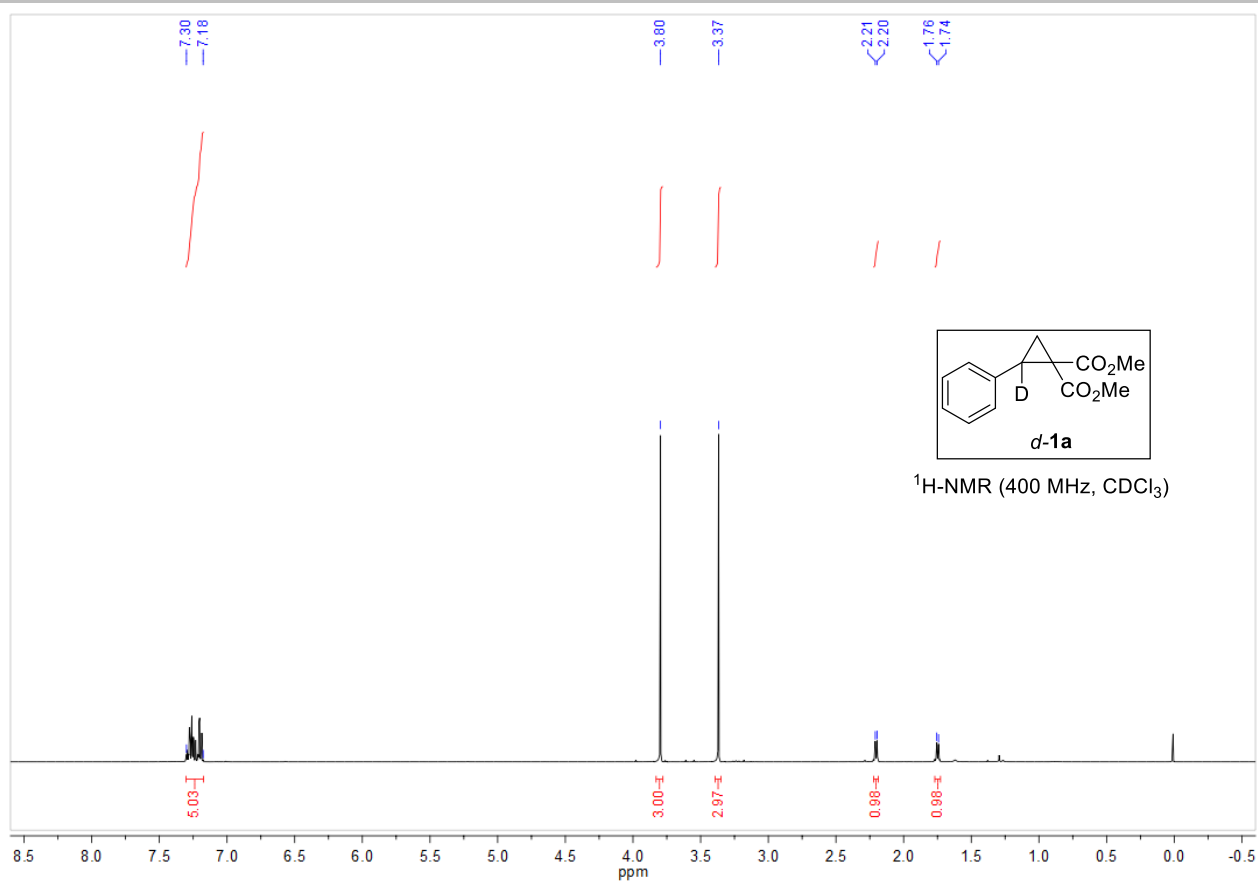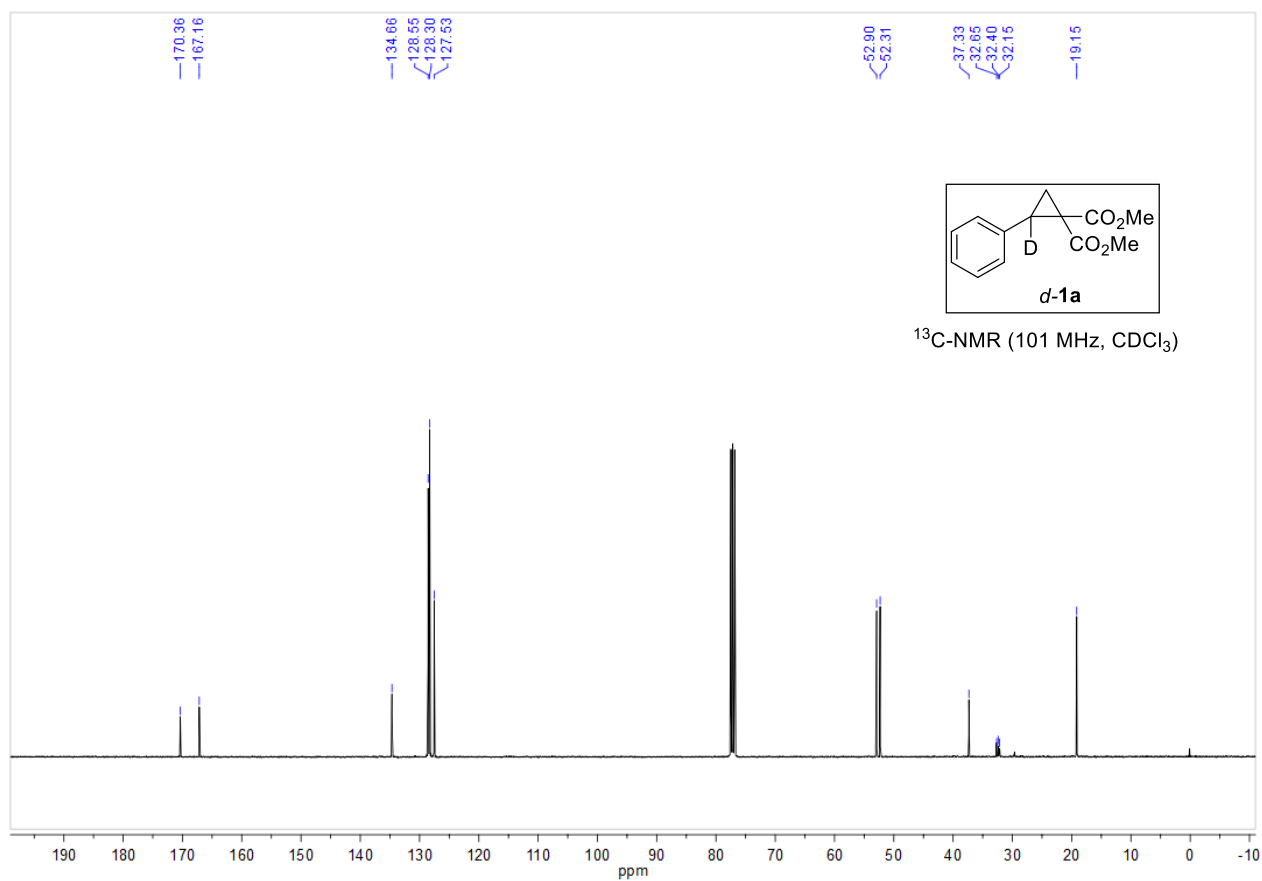

## SUPPORTING INFORMATION

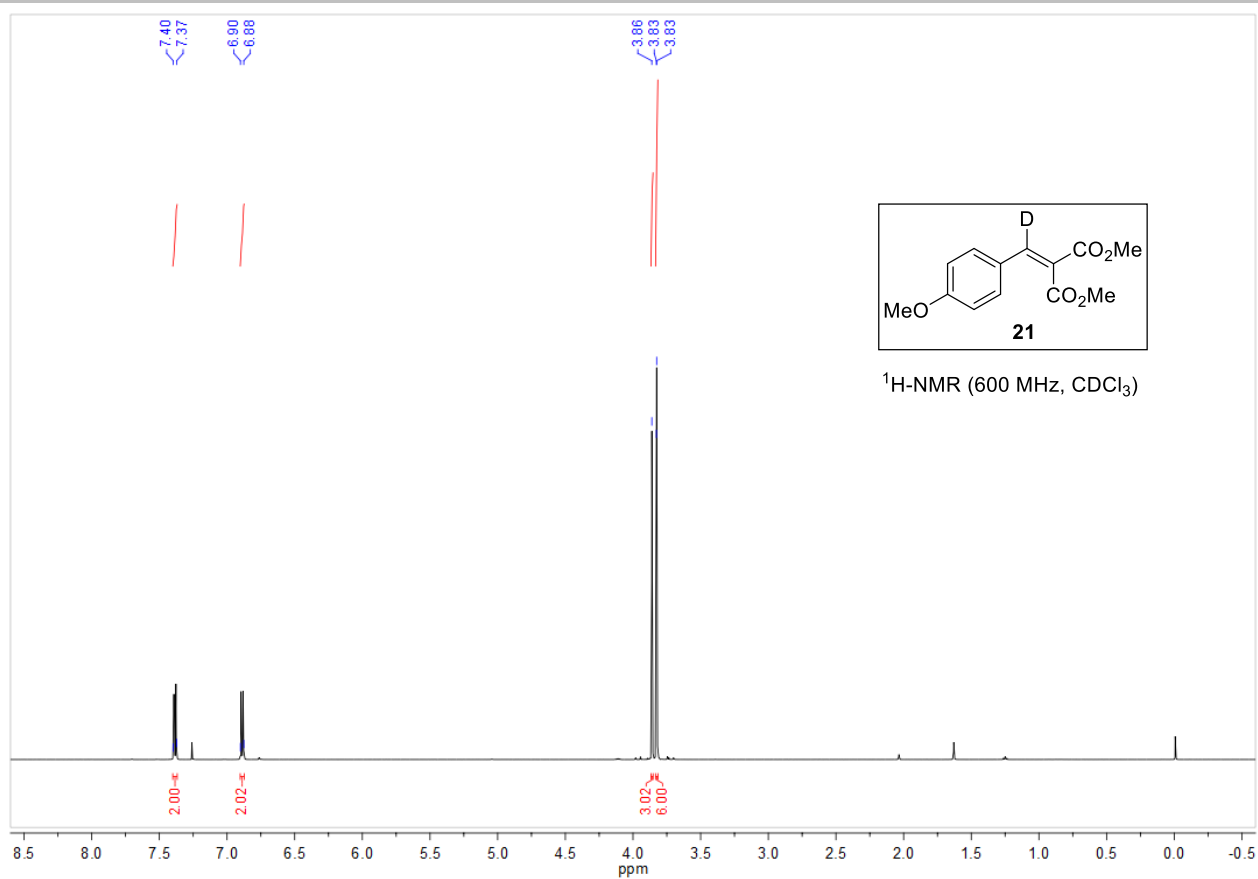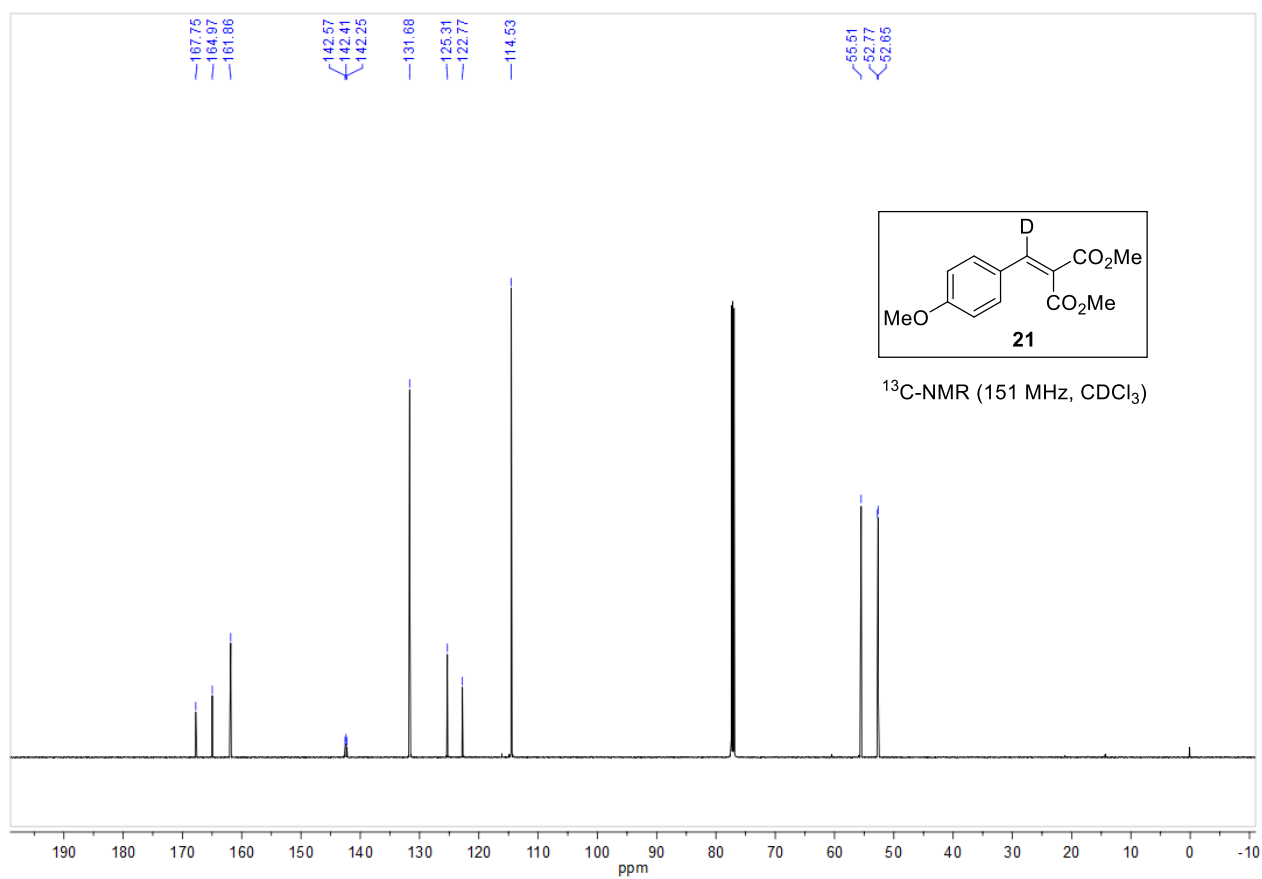



## SUPPORTING INFORMATION

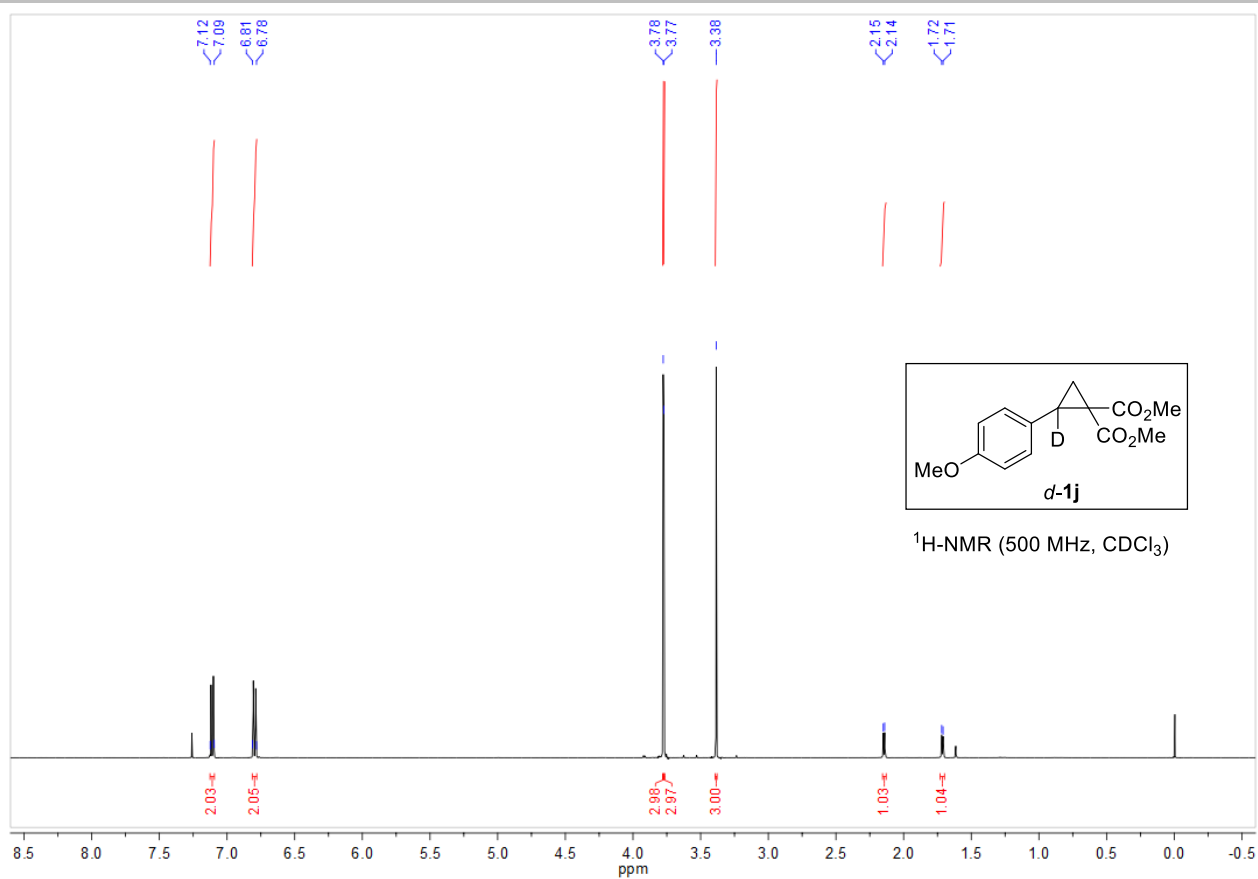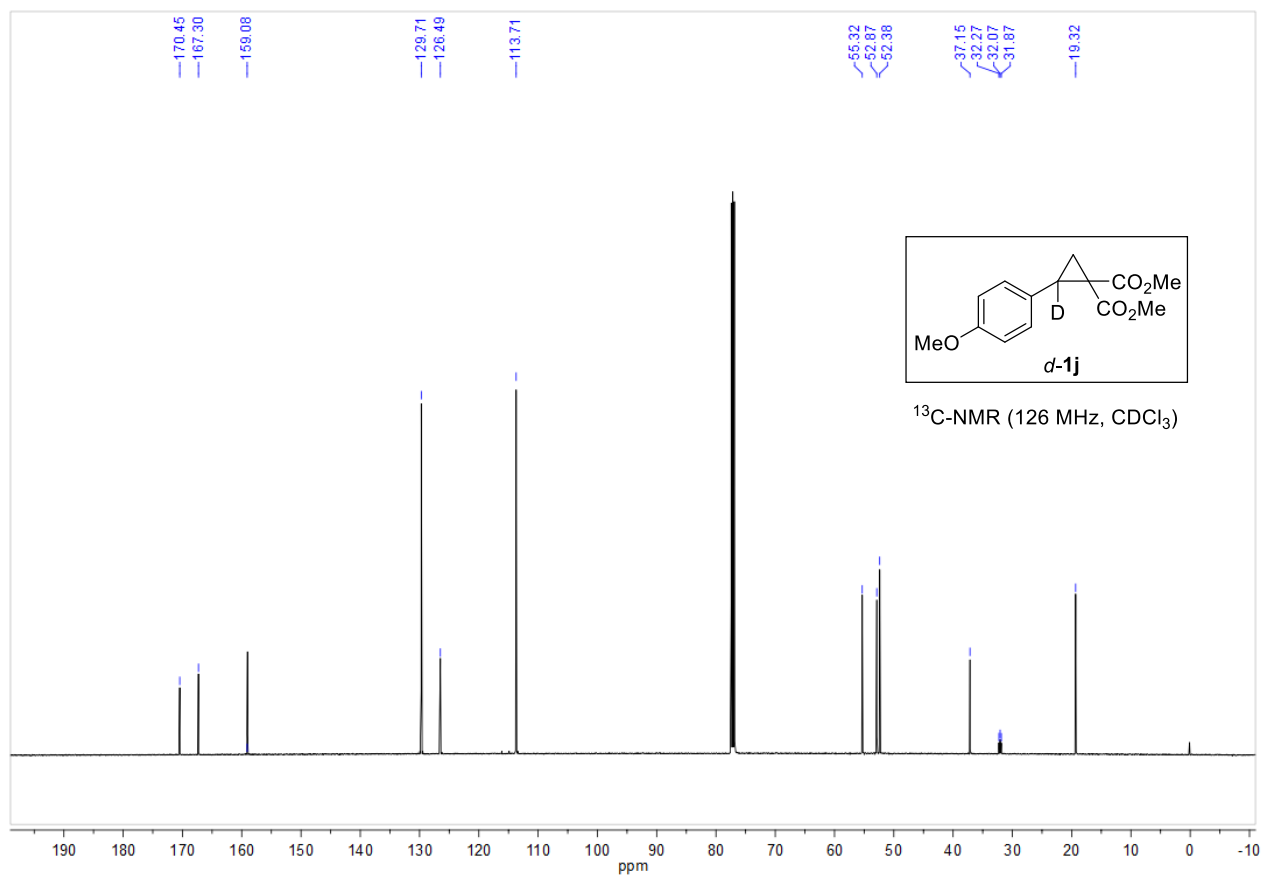

## SUPPORTING INFORMATION

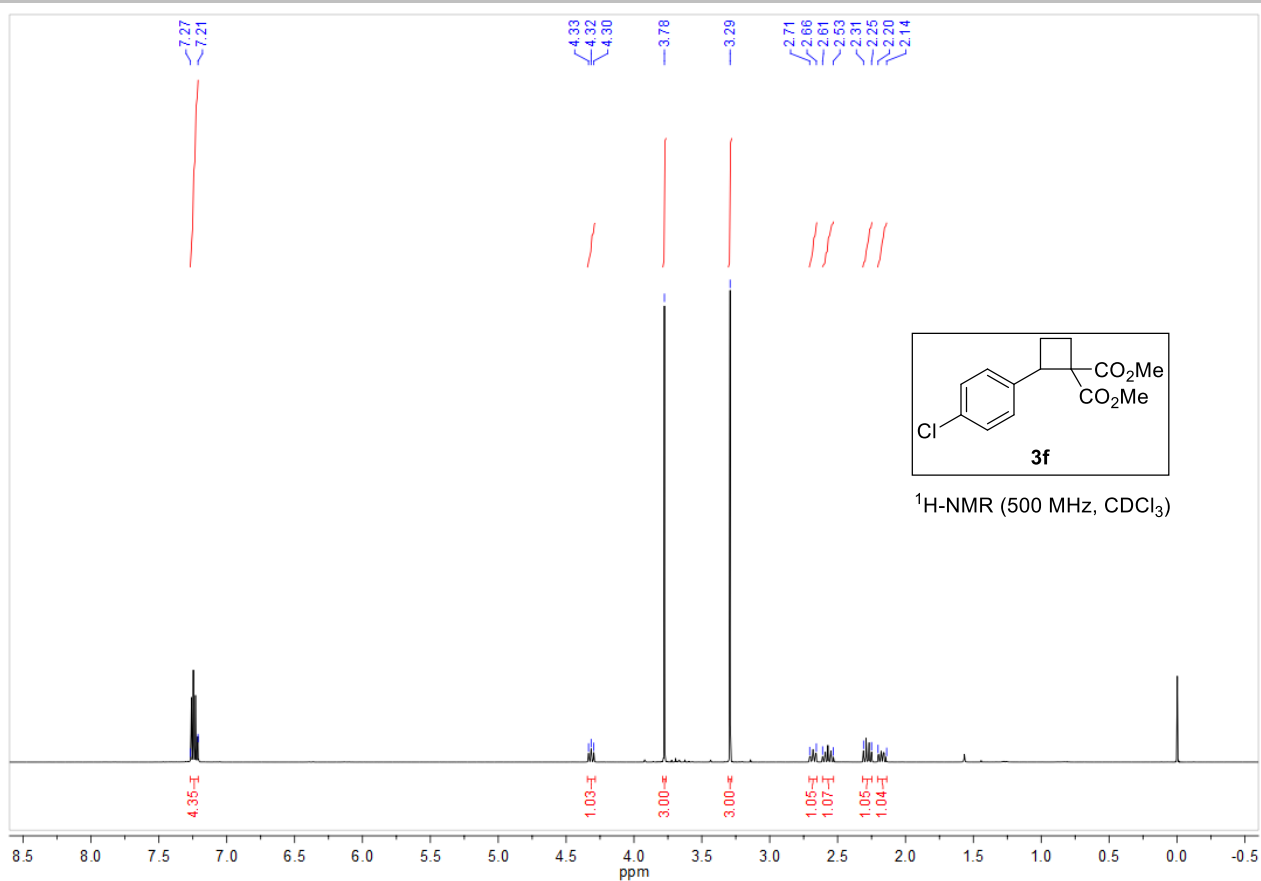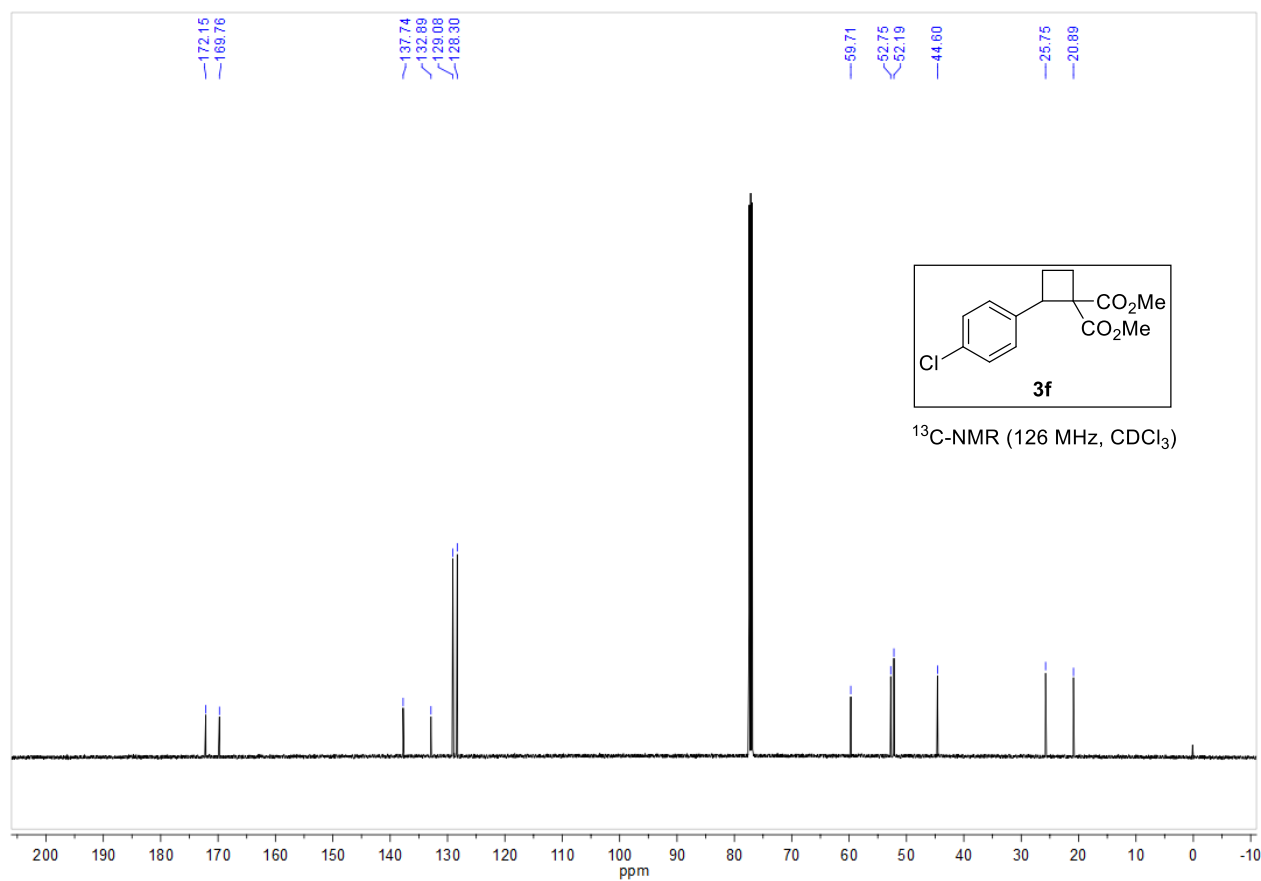

## SUPPORTING INFORMATION

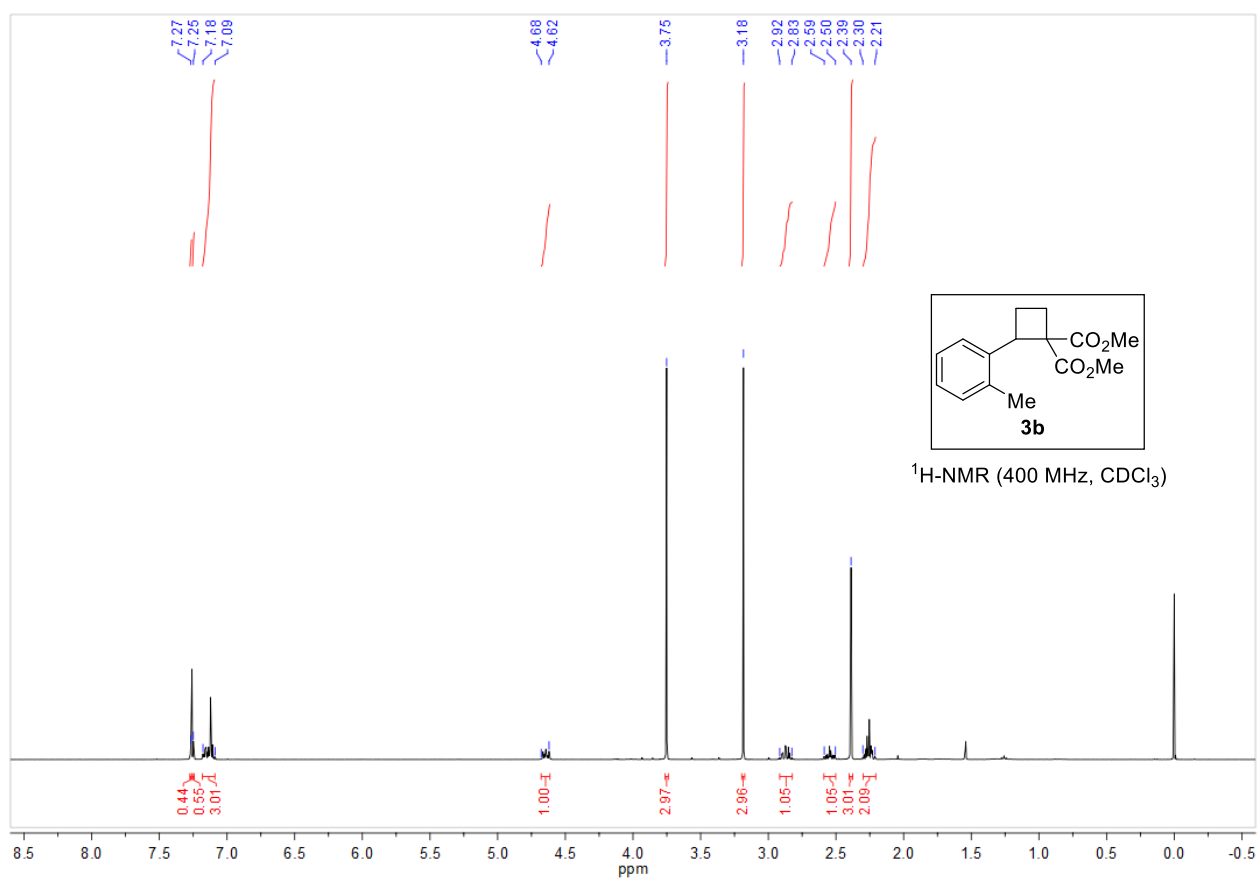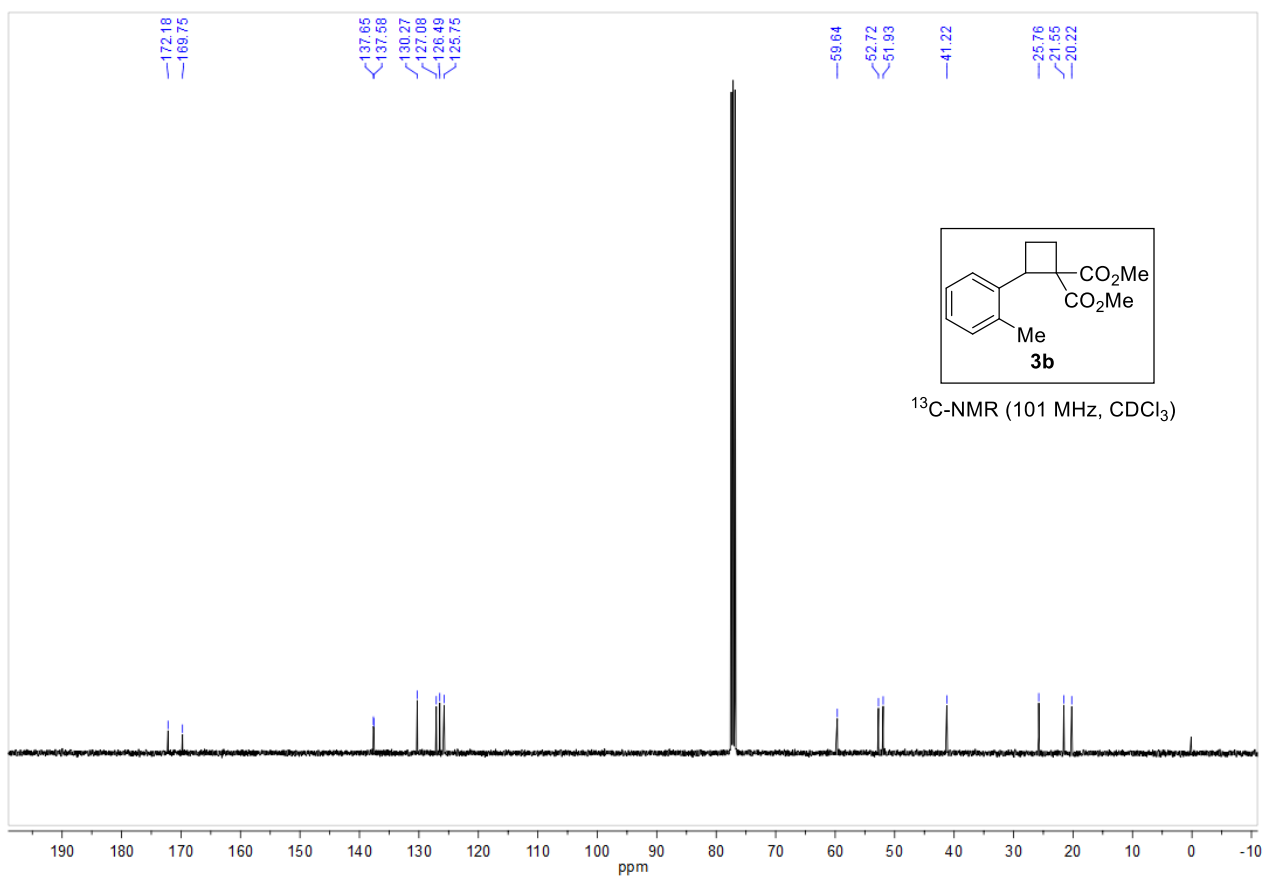

## SUPPORTING INFORMATION

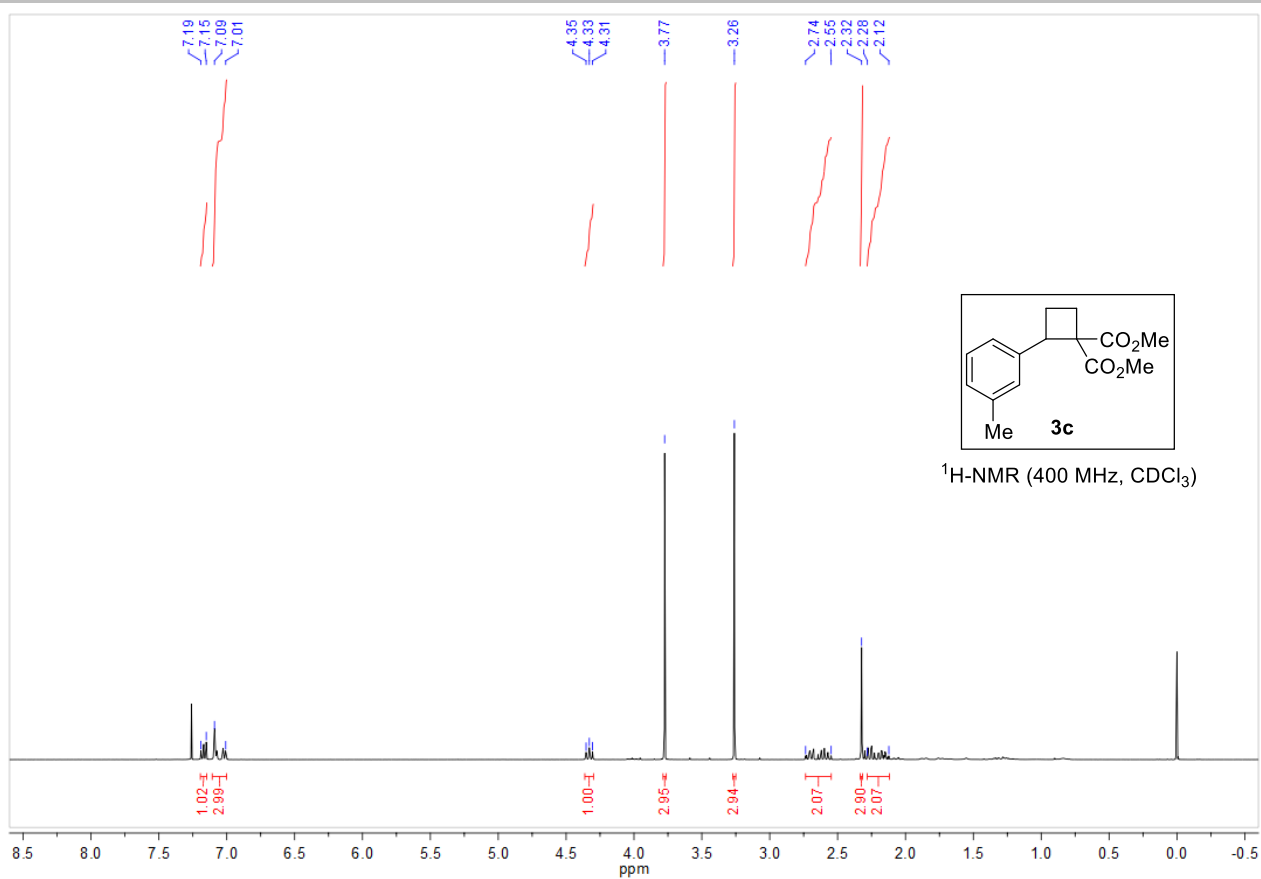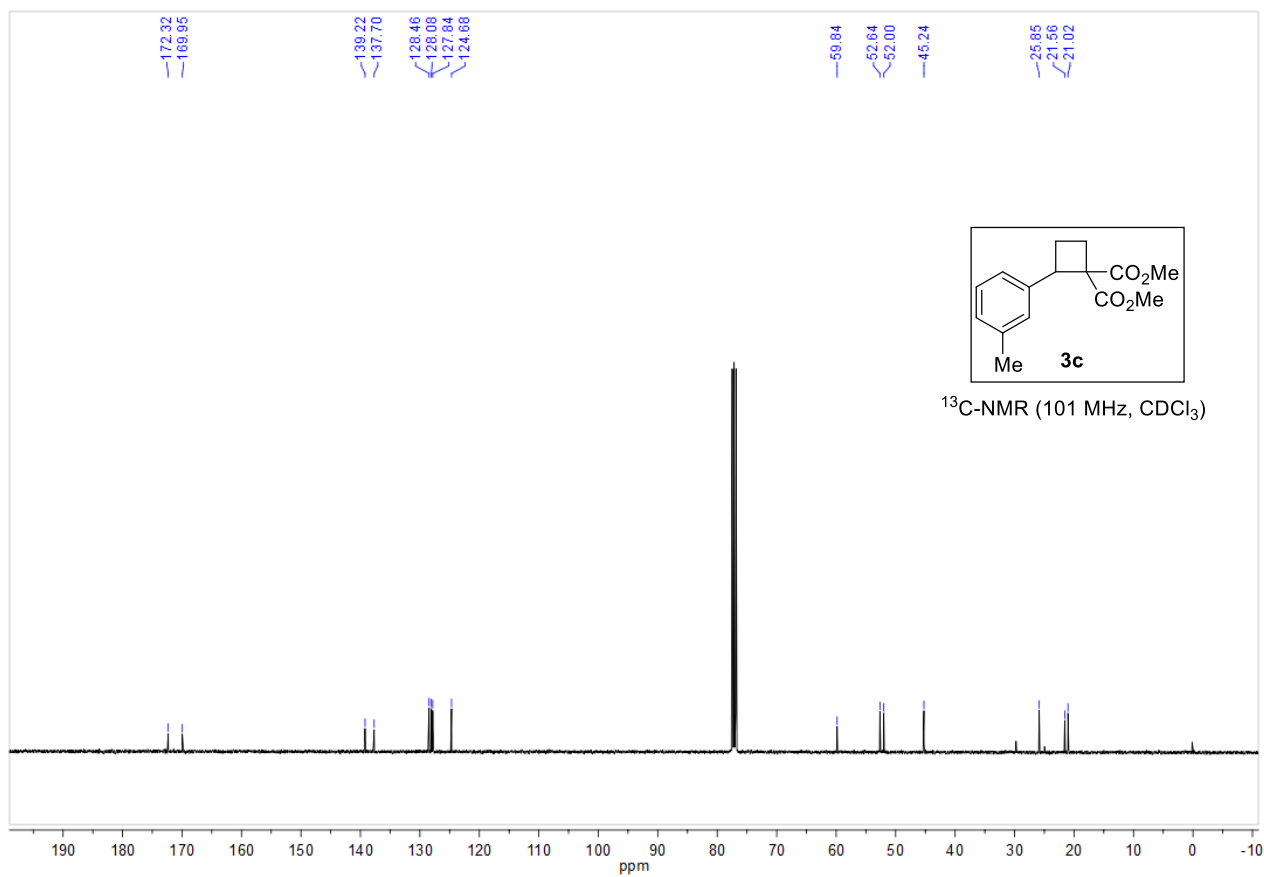

## SUPPORTING INFORMATION

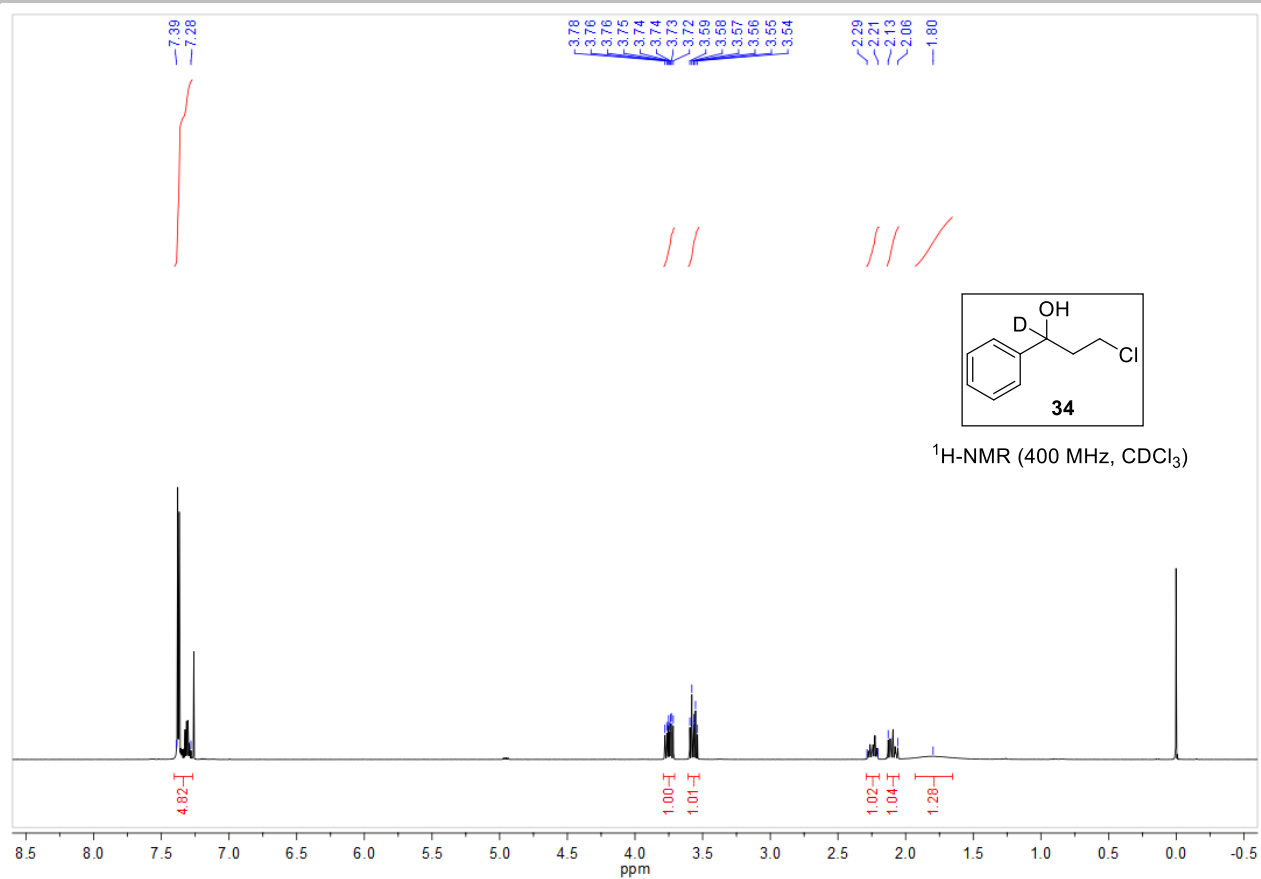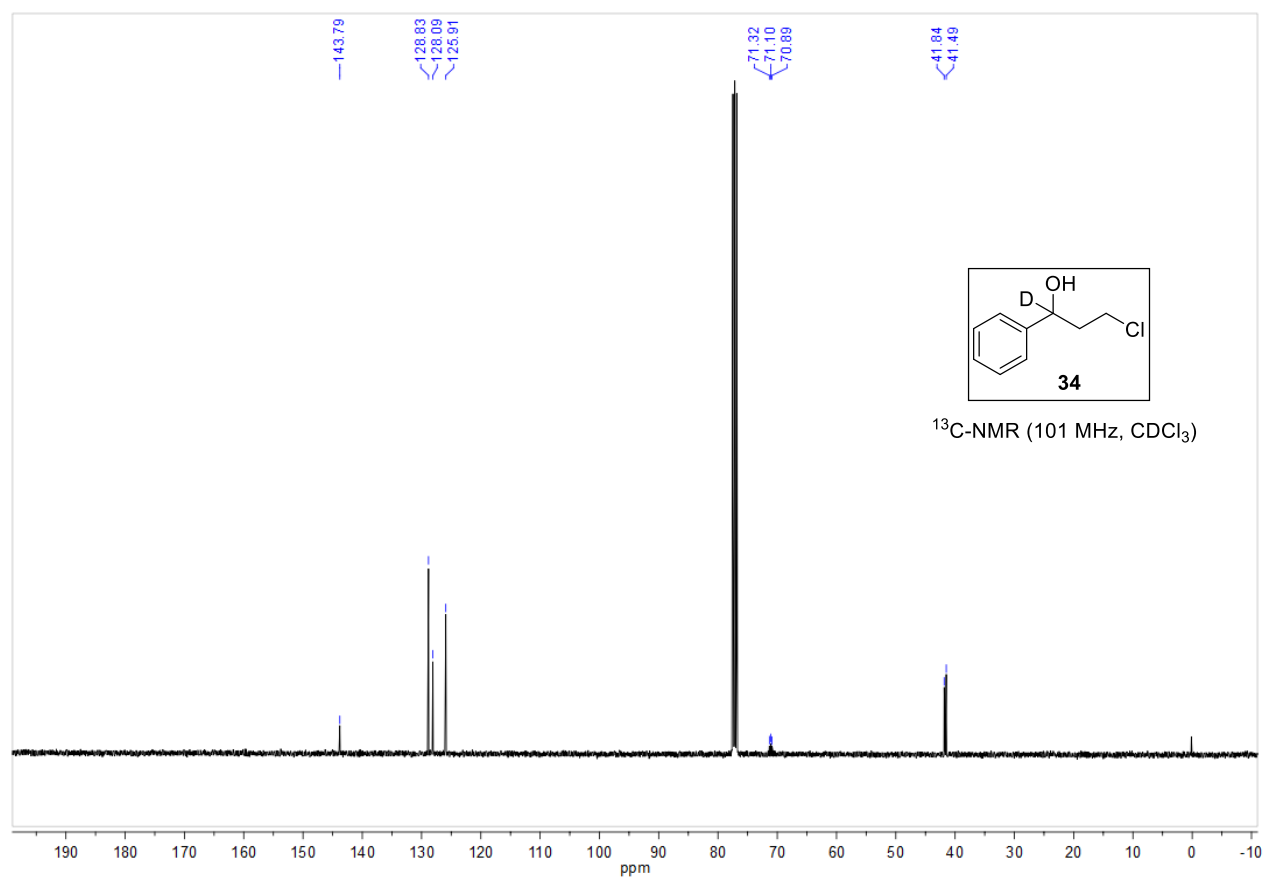

## SUPPORTING INFORMATION

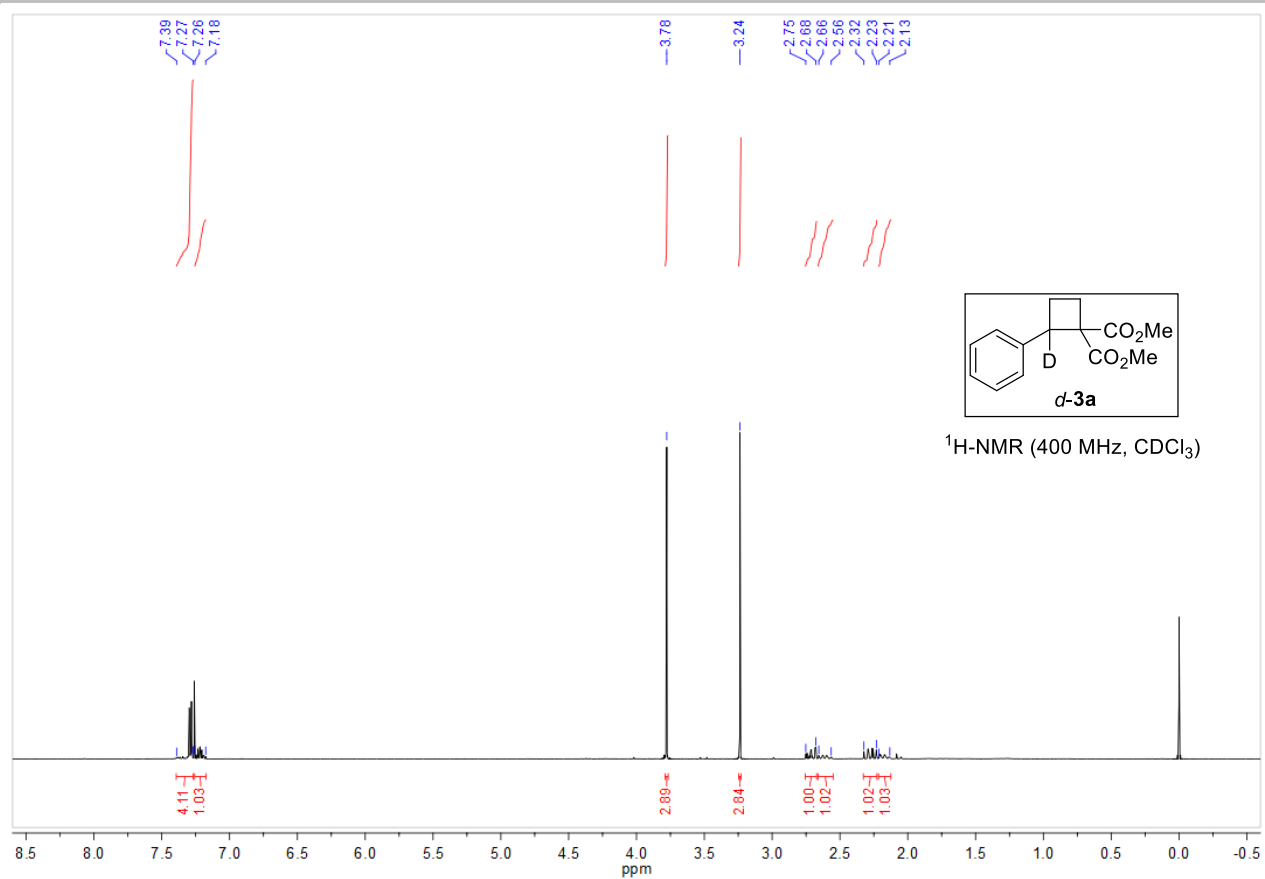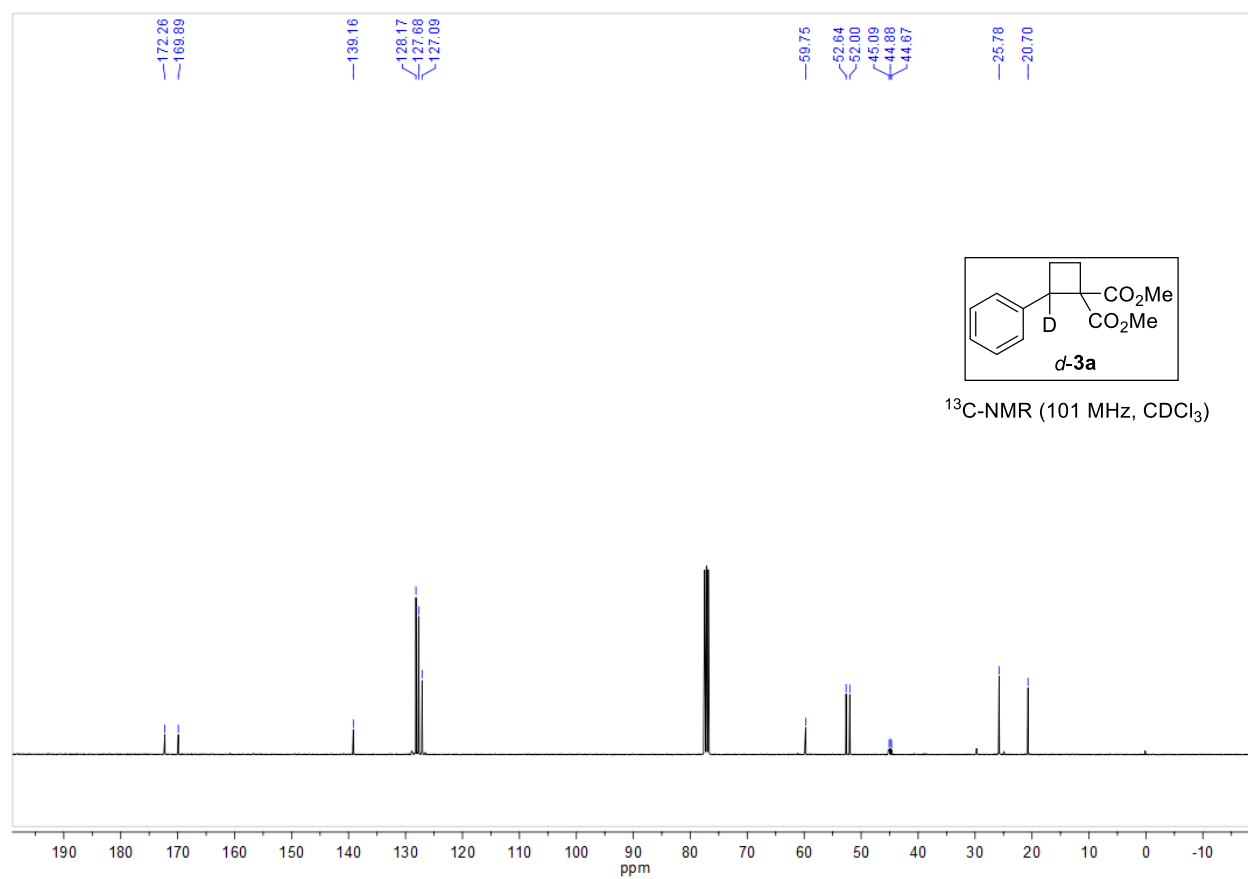

## SUPPORTING INFORMATION

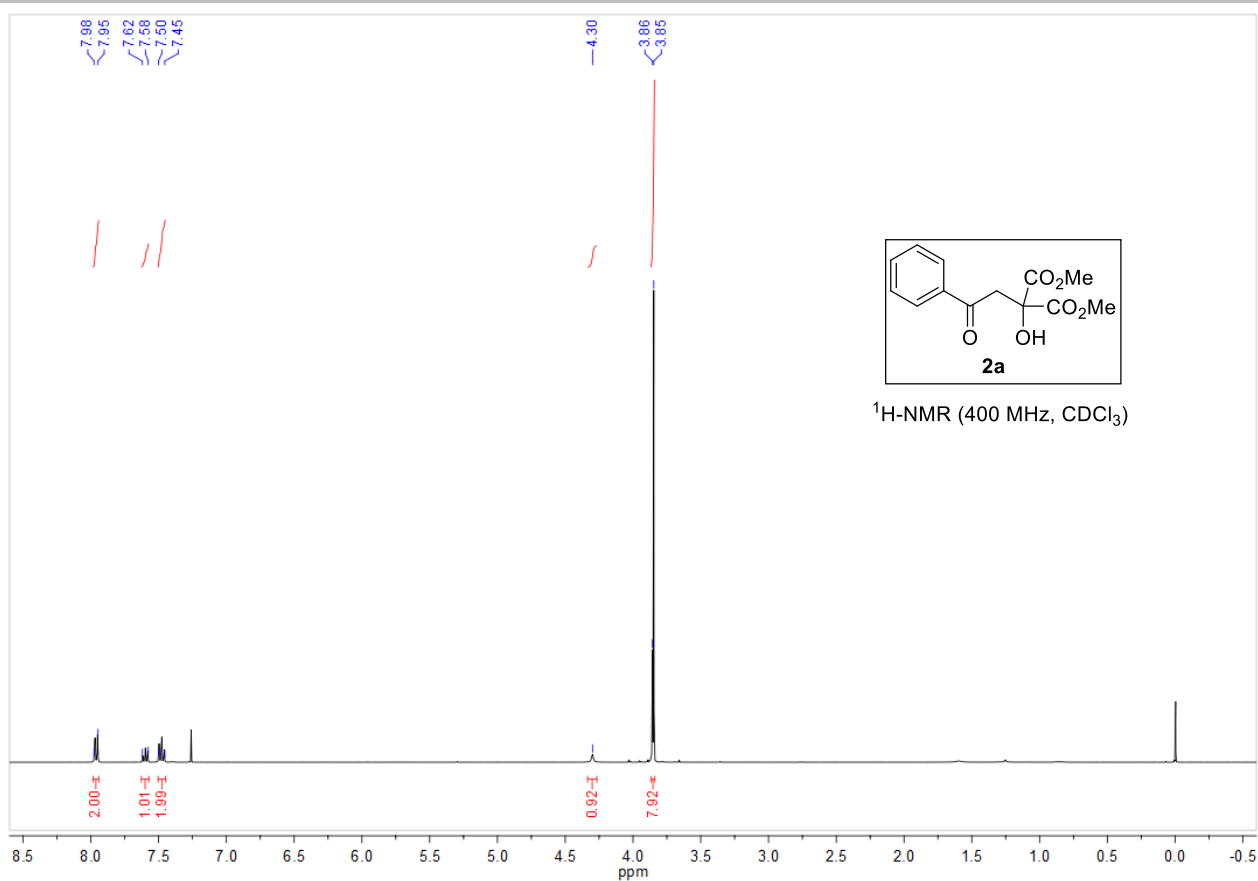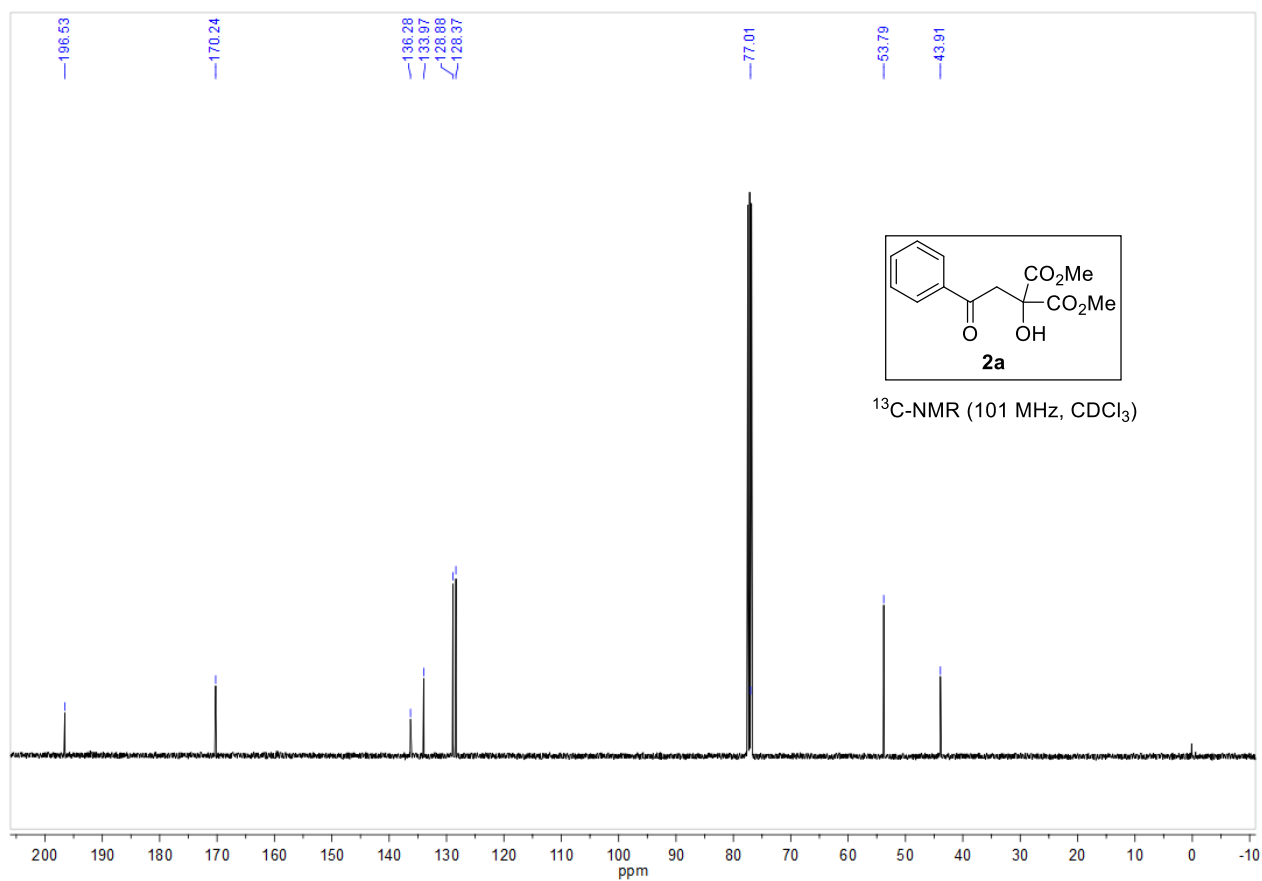

## SUPPORTING INFORMATION

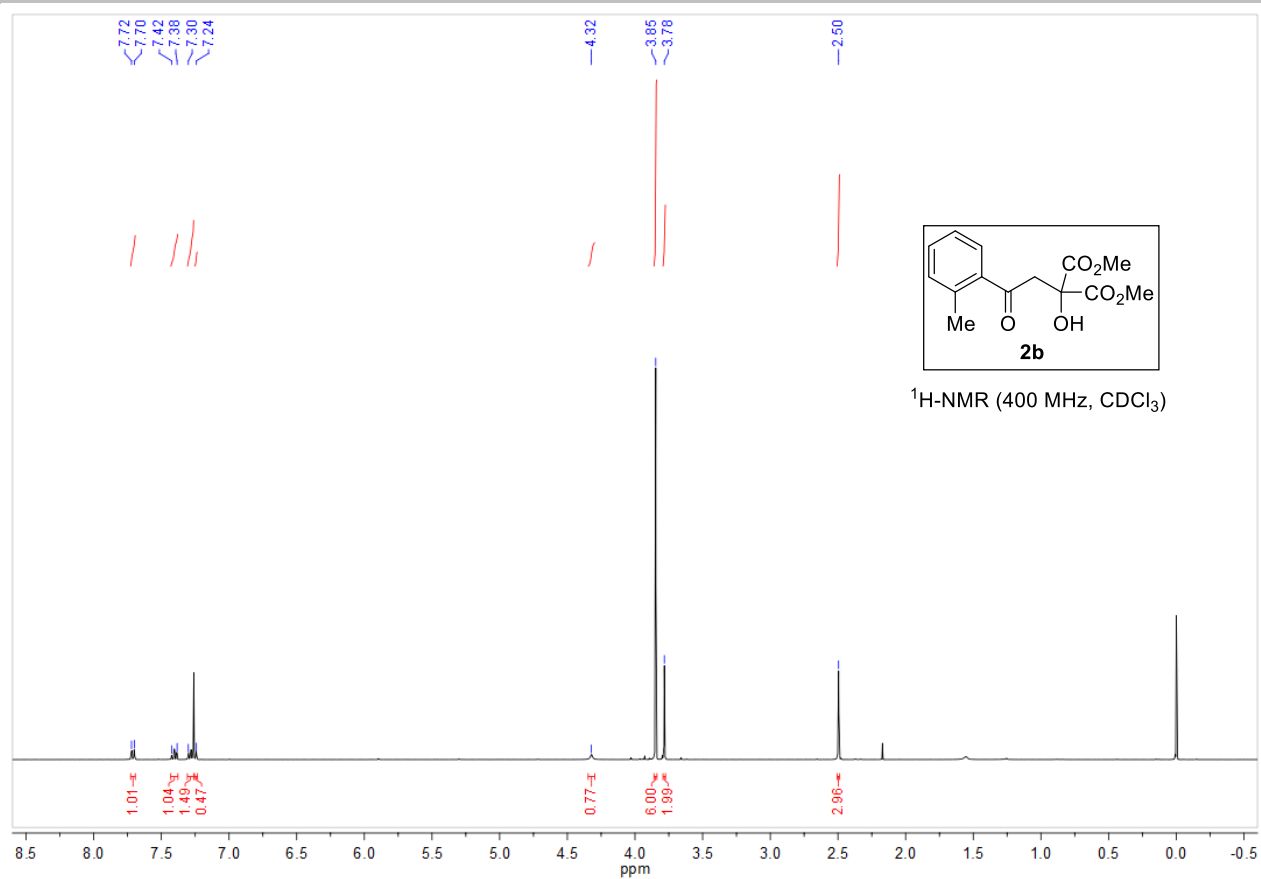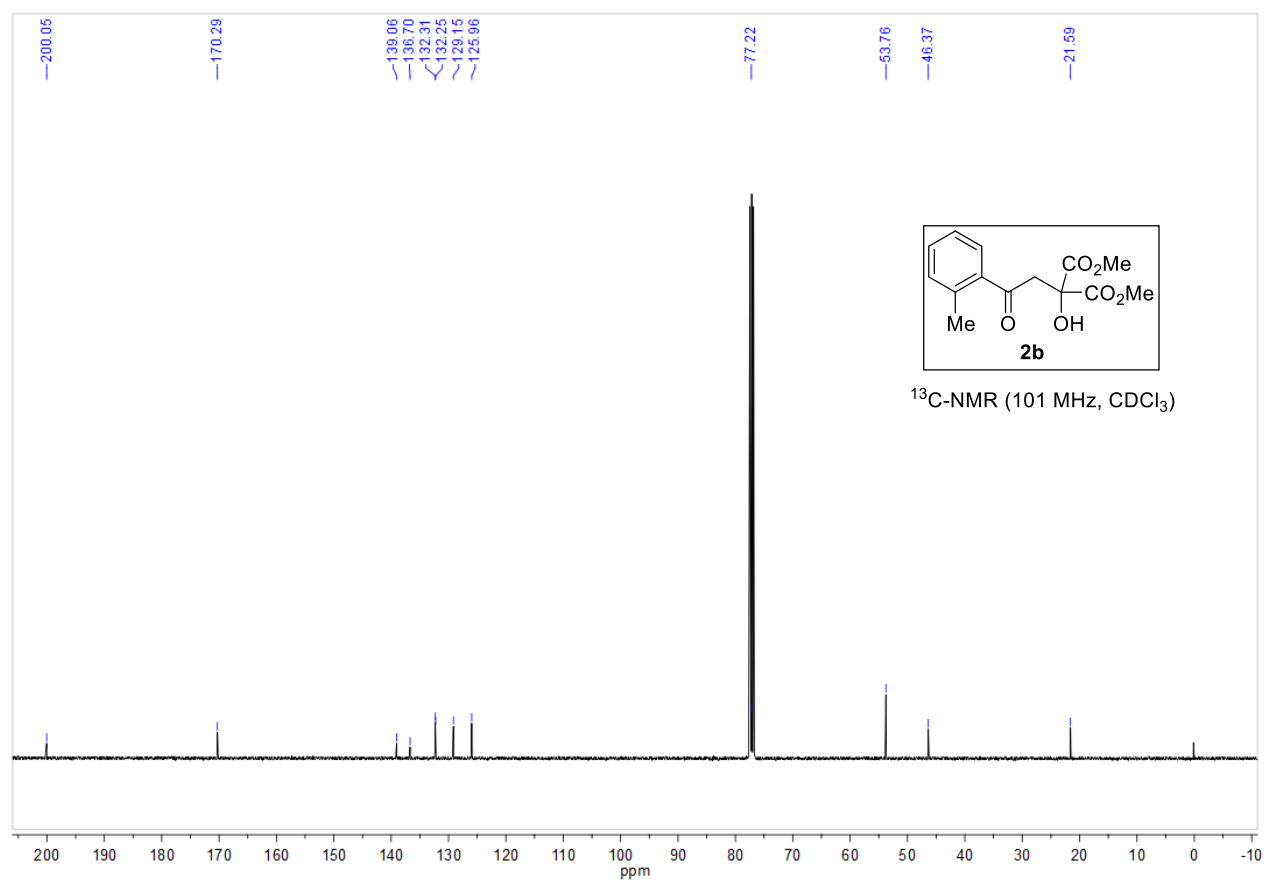



## SUPPORTING INFORMATION

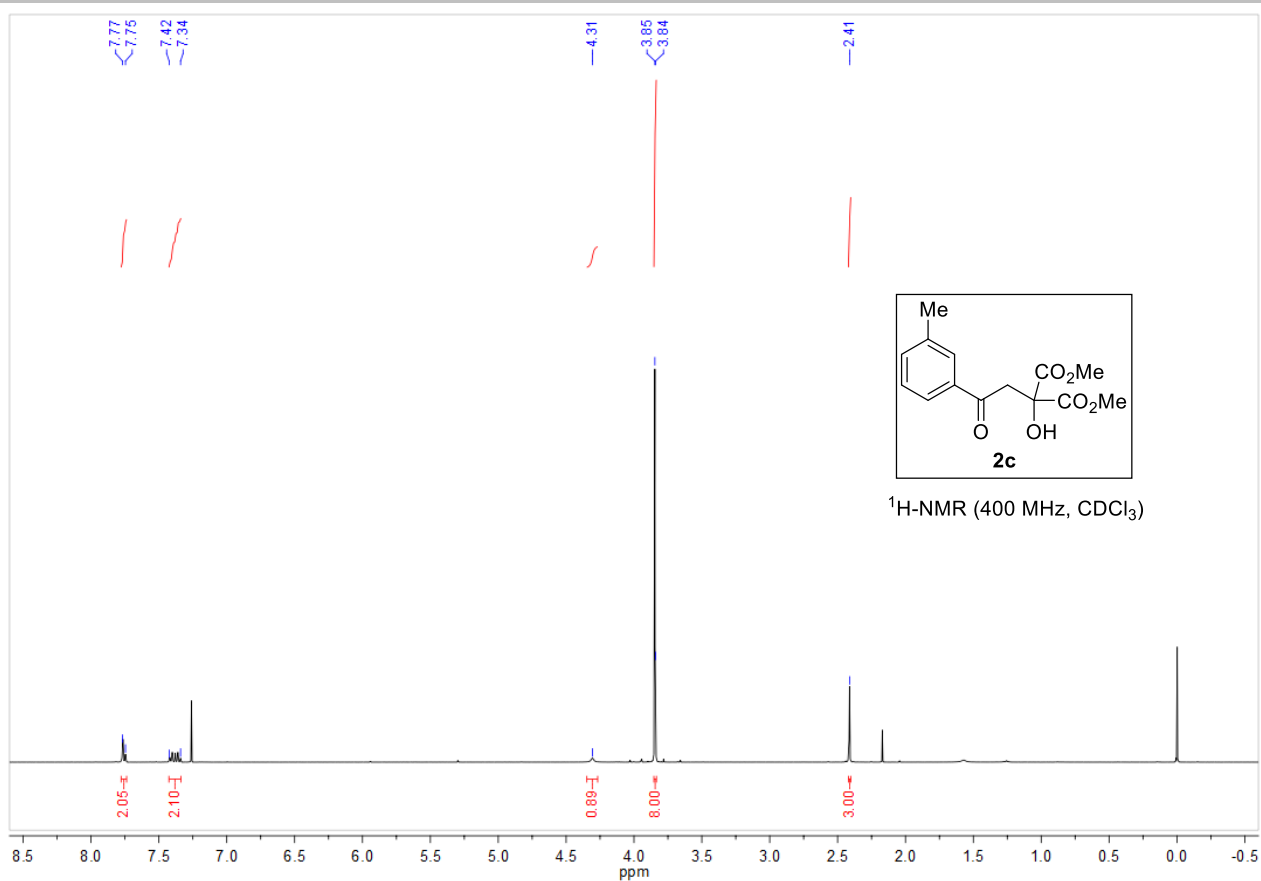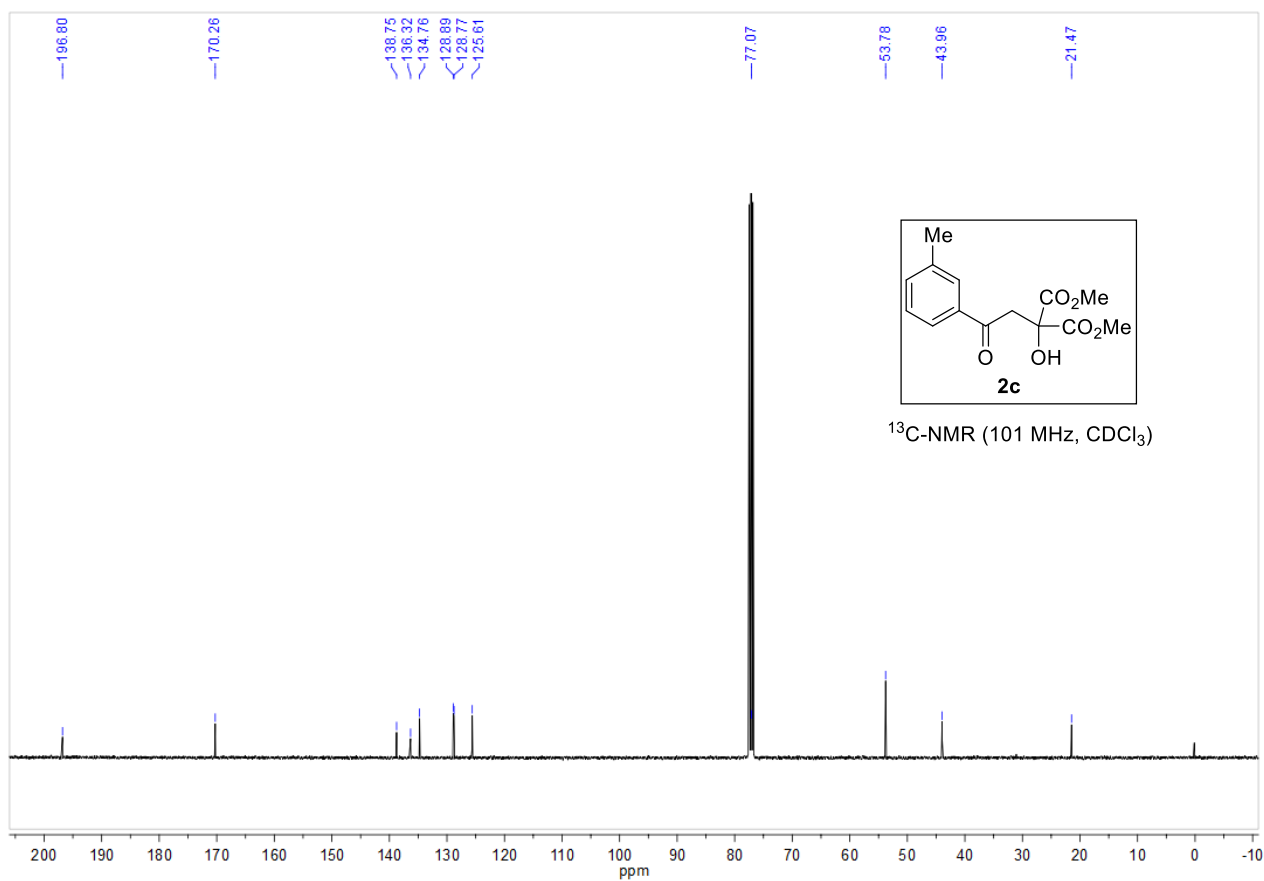

## SUPPORTING INFORMATION

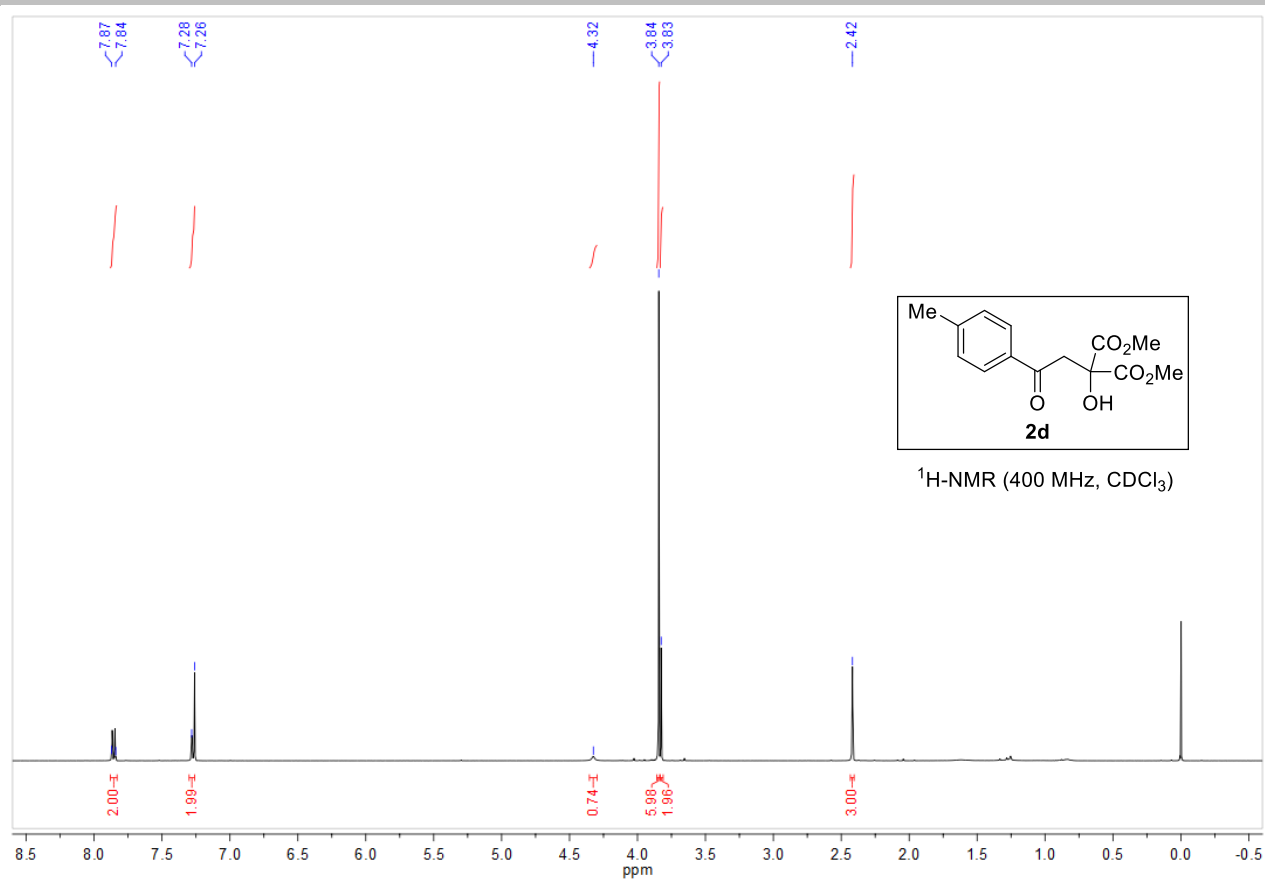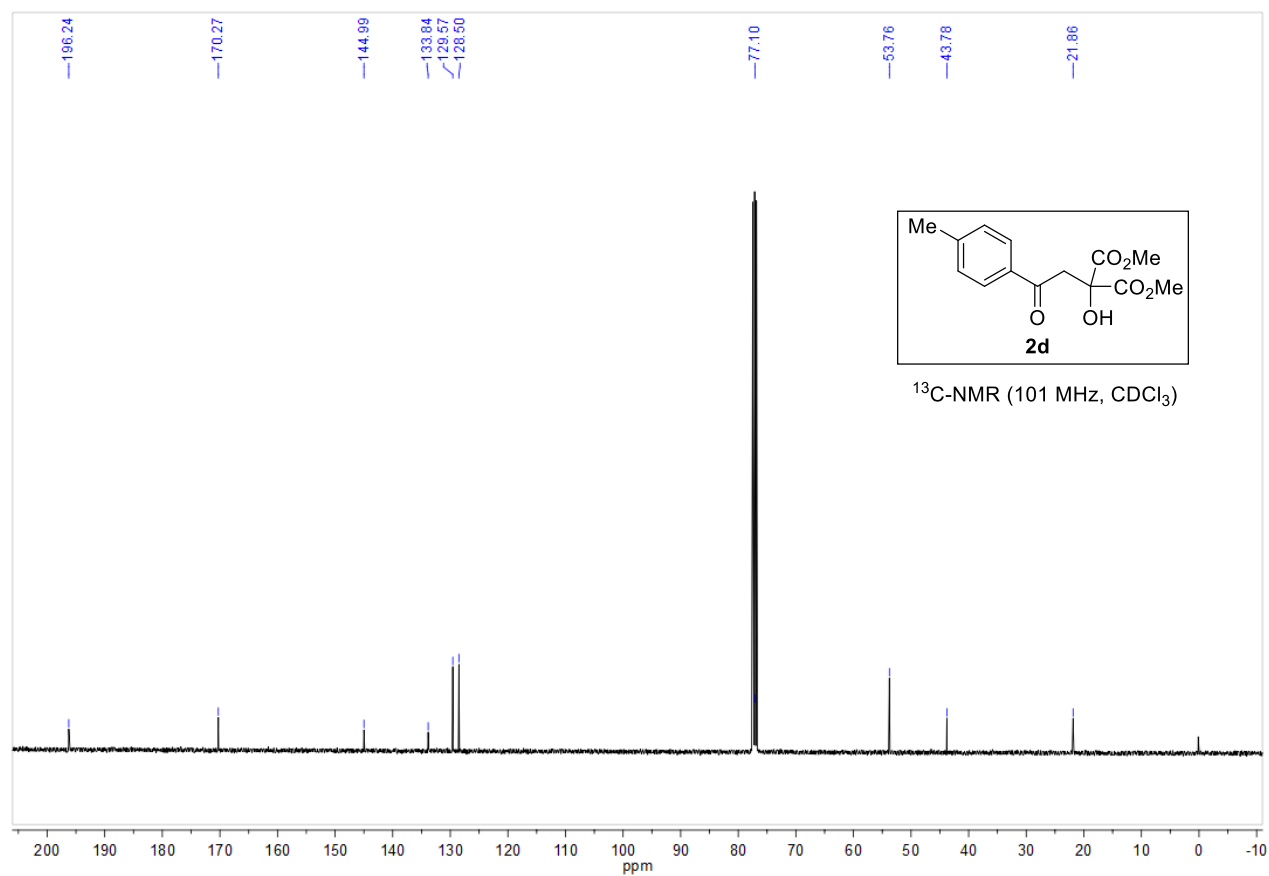

## SUPPORTING INFORMATION

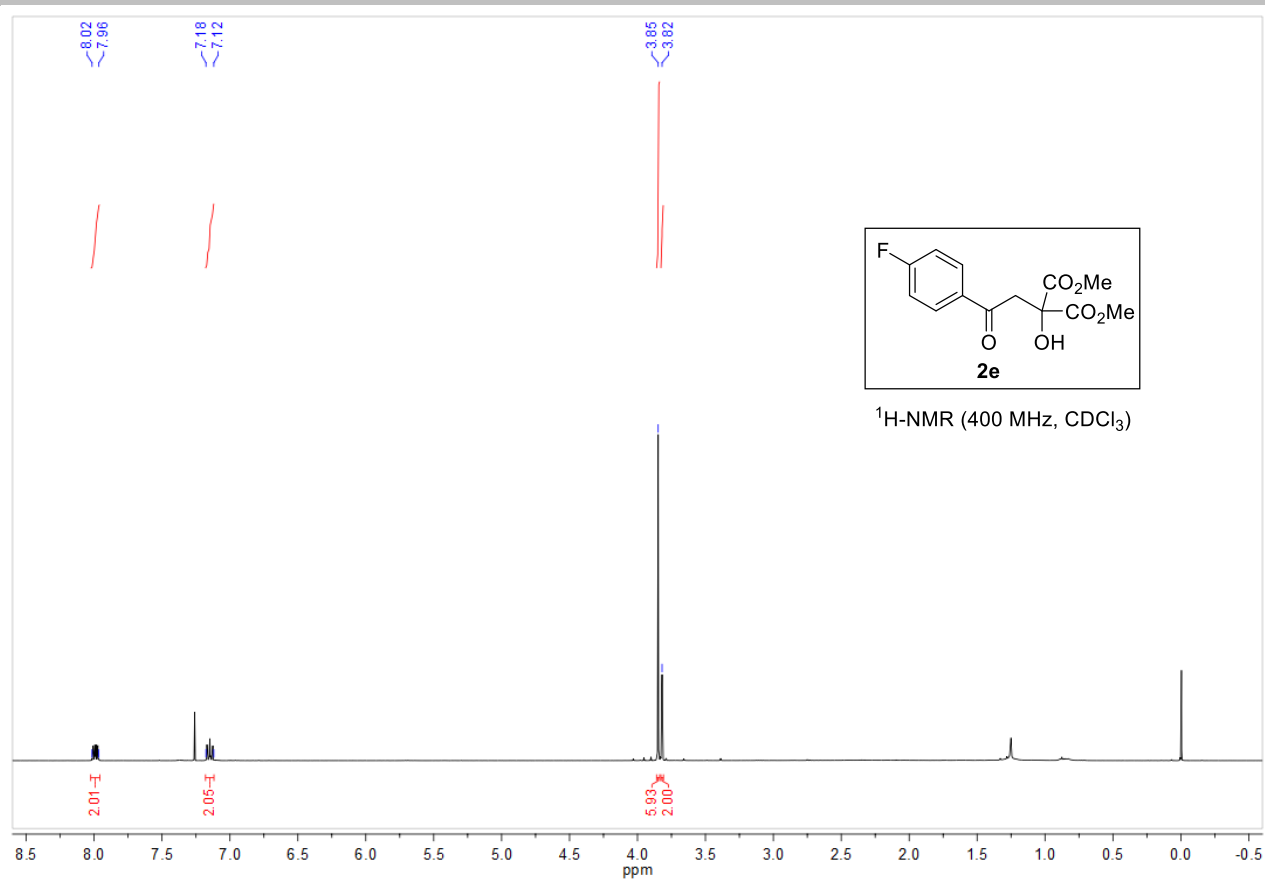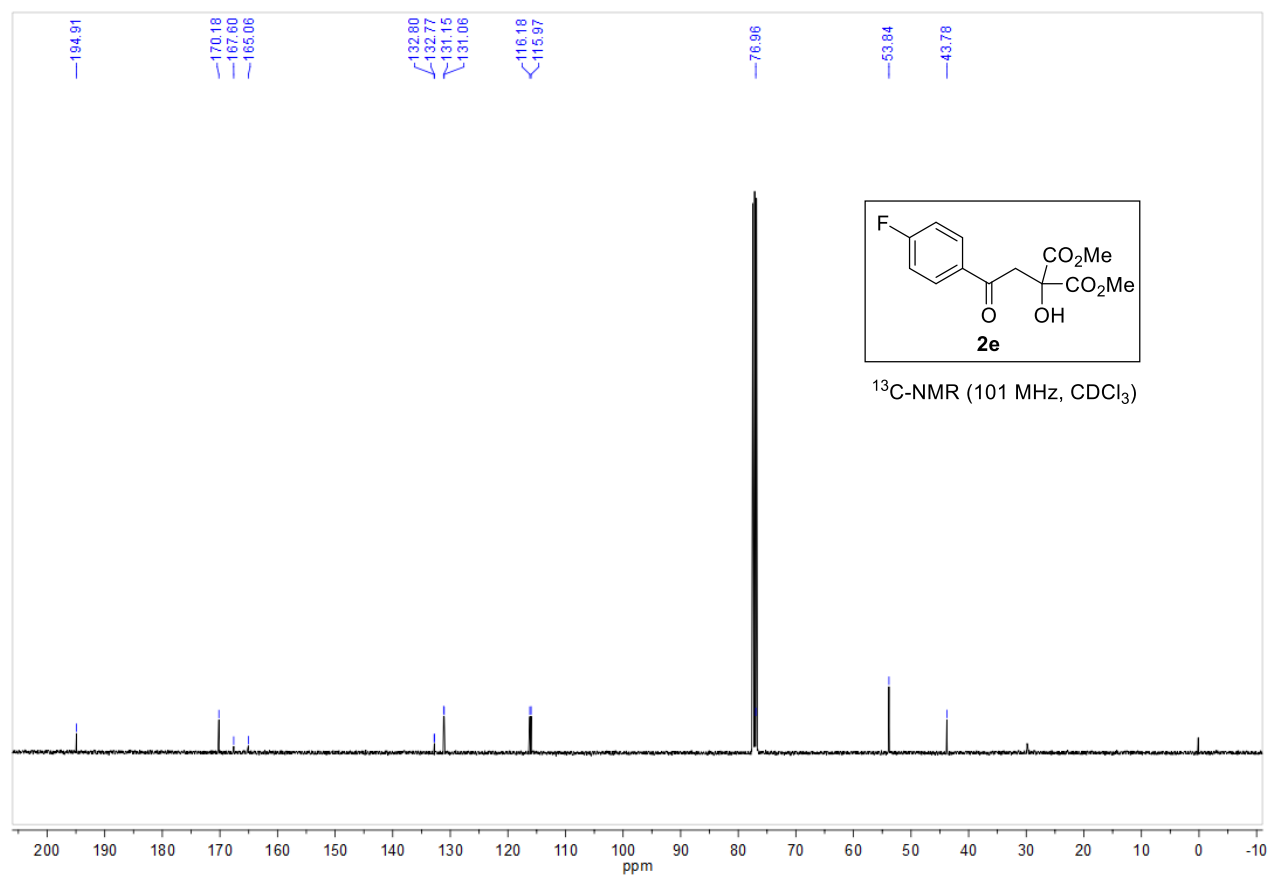

## SUPPORTING INFORMATION

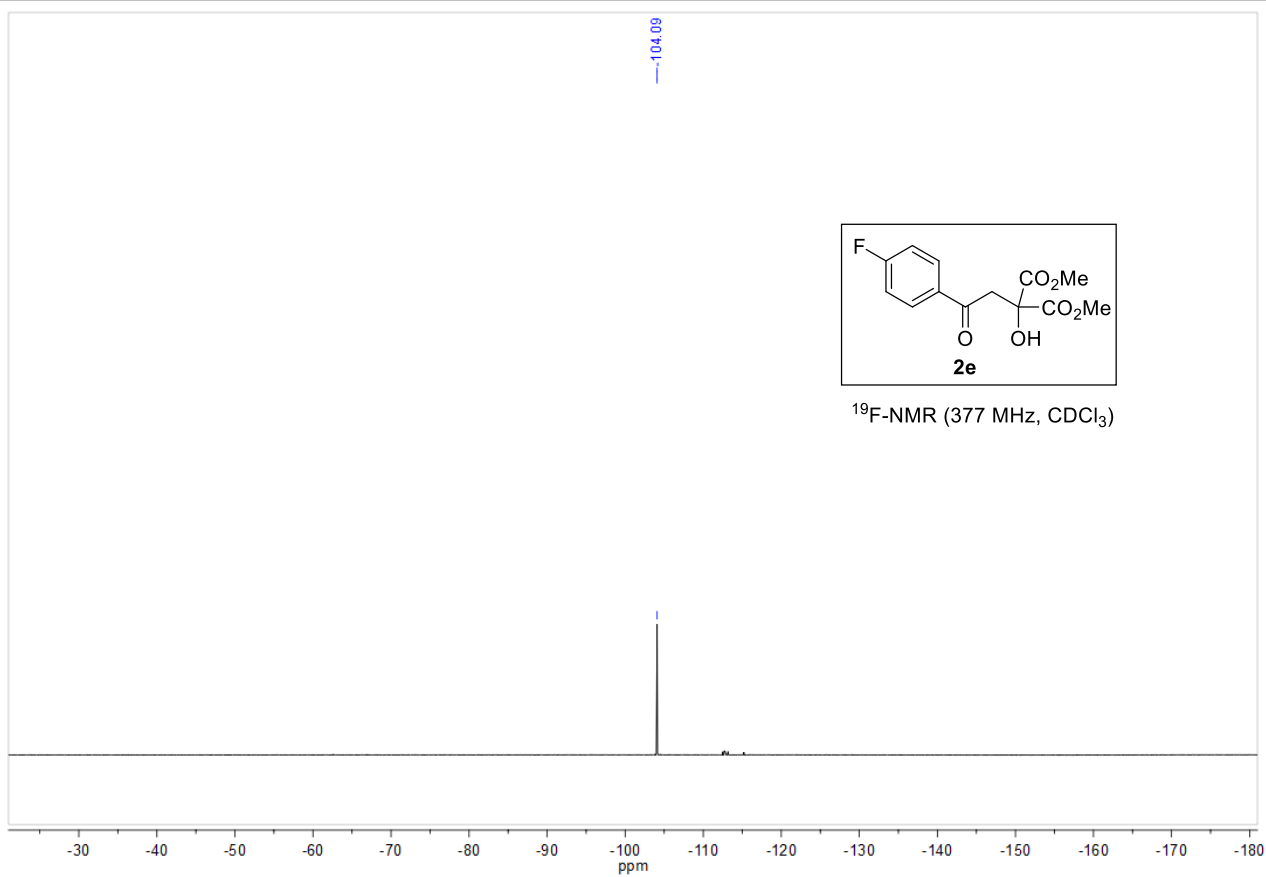

## SUPPORTING INFORMATION

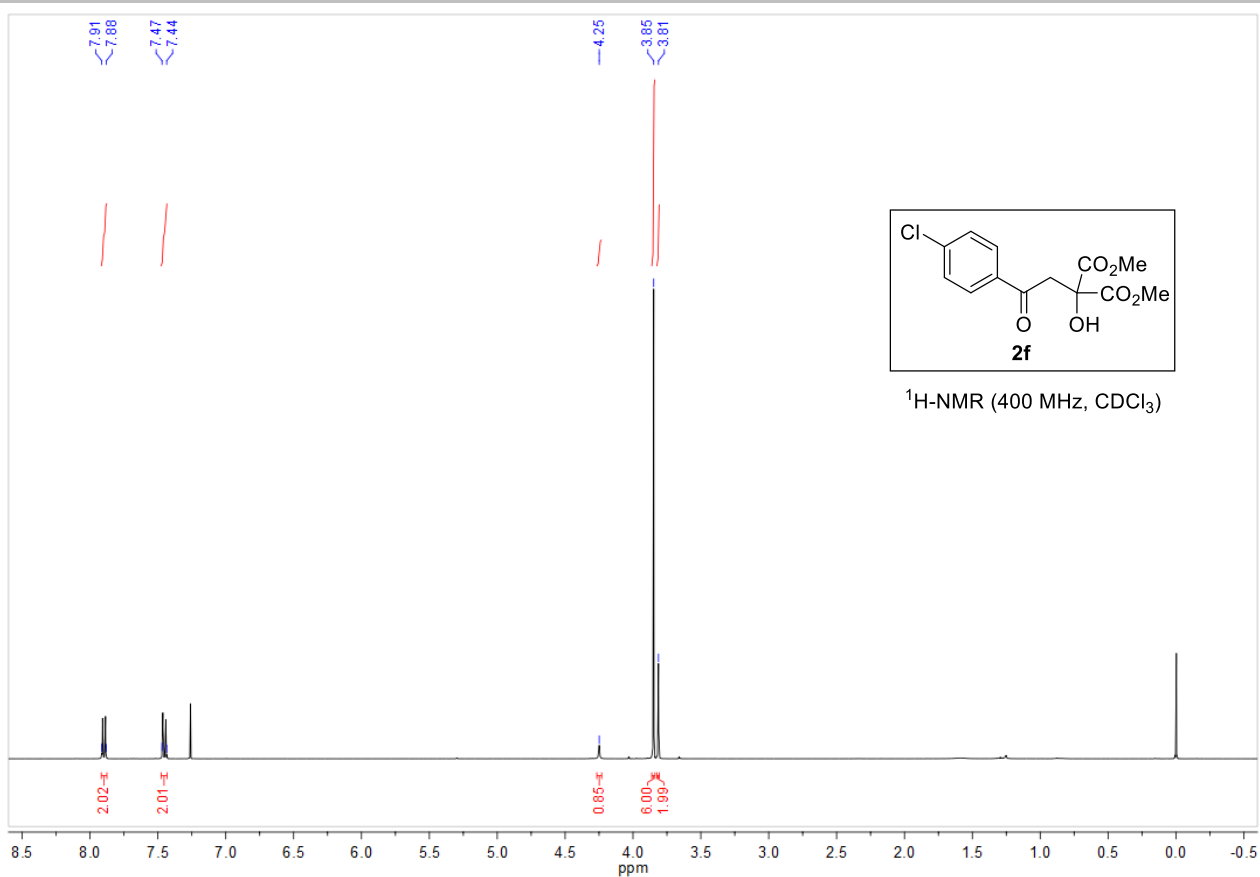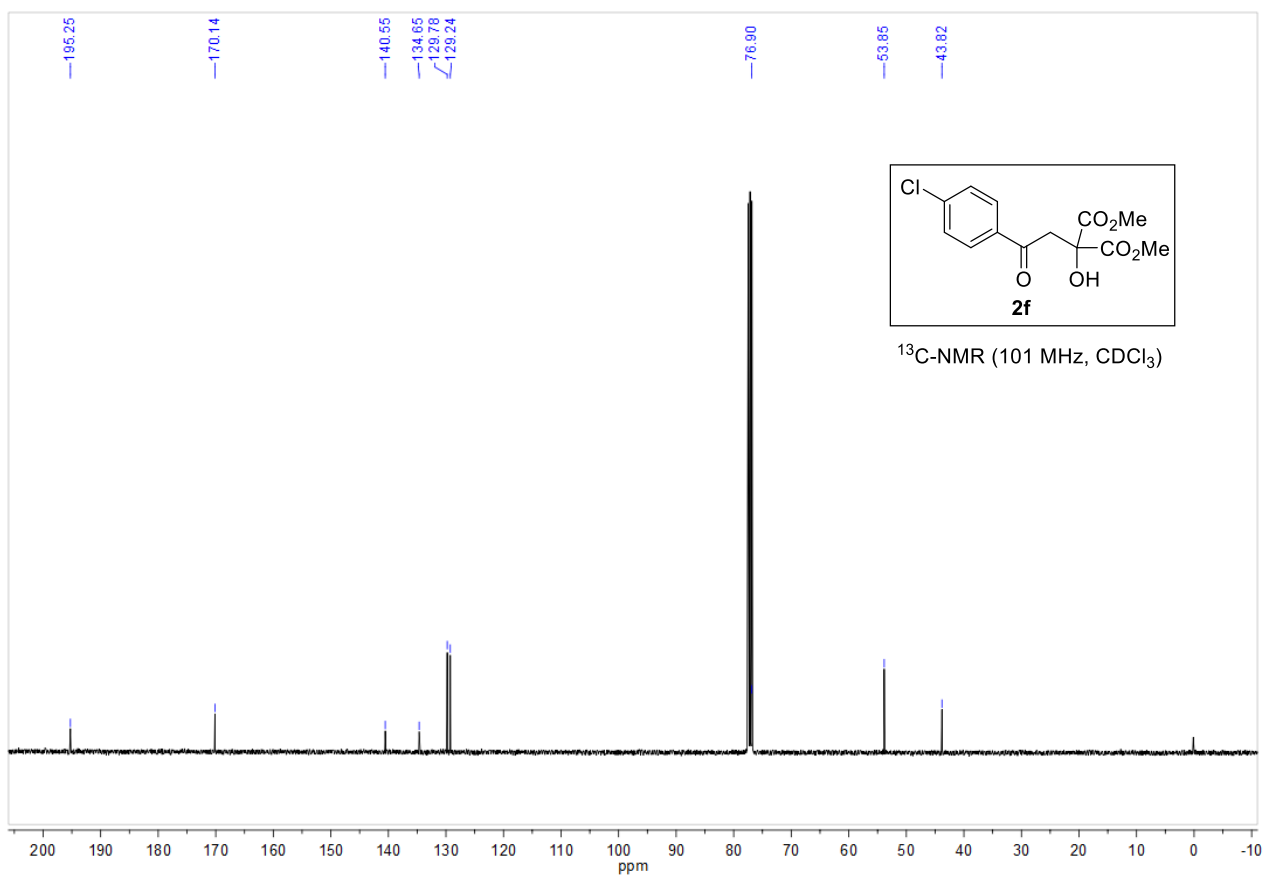

## SUPPORTING INFORMATION

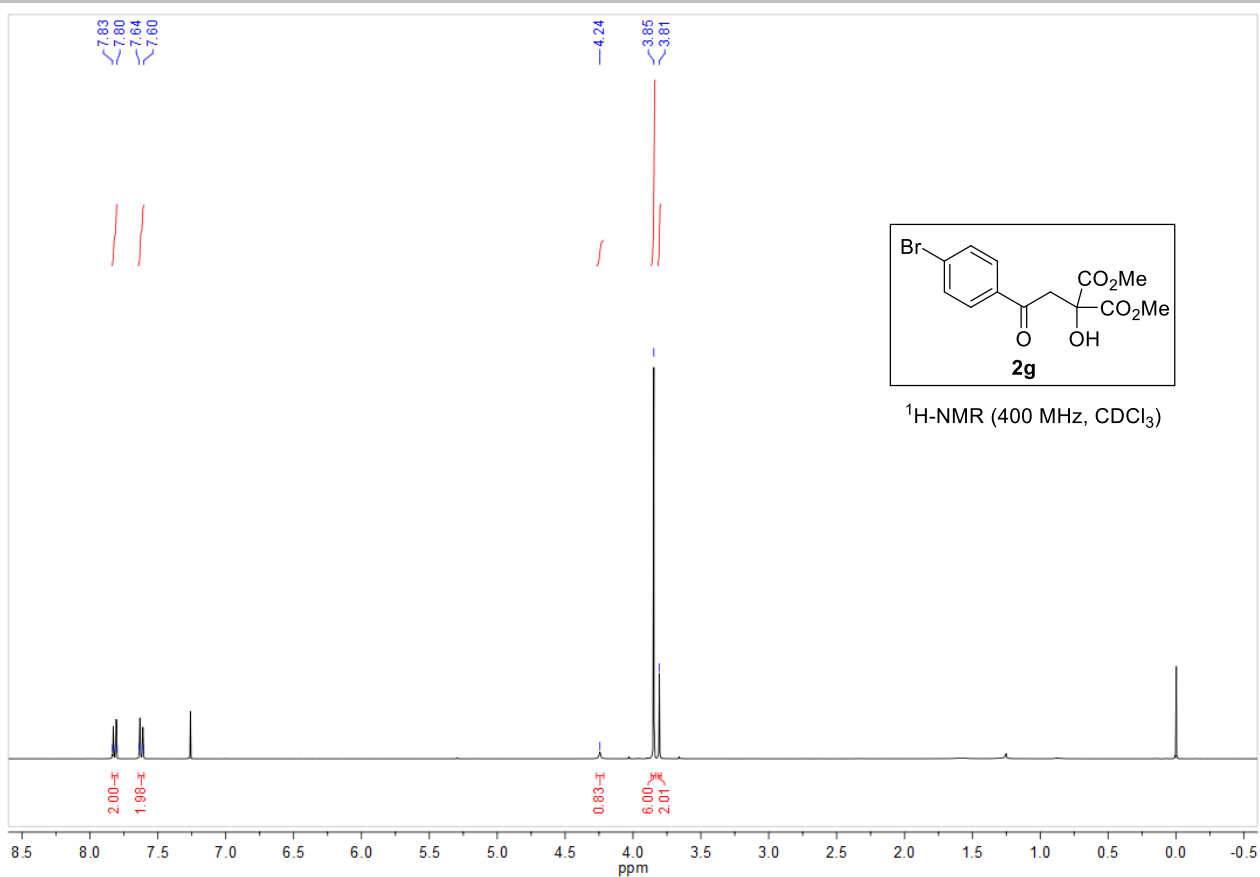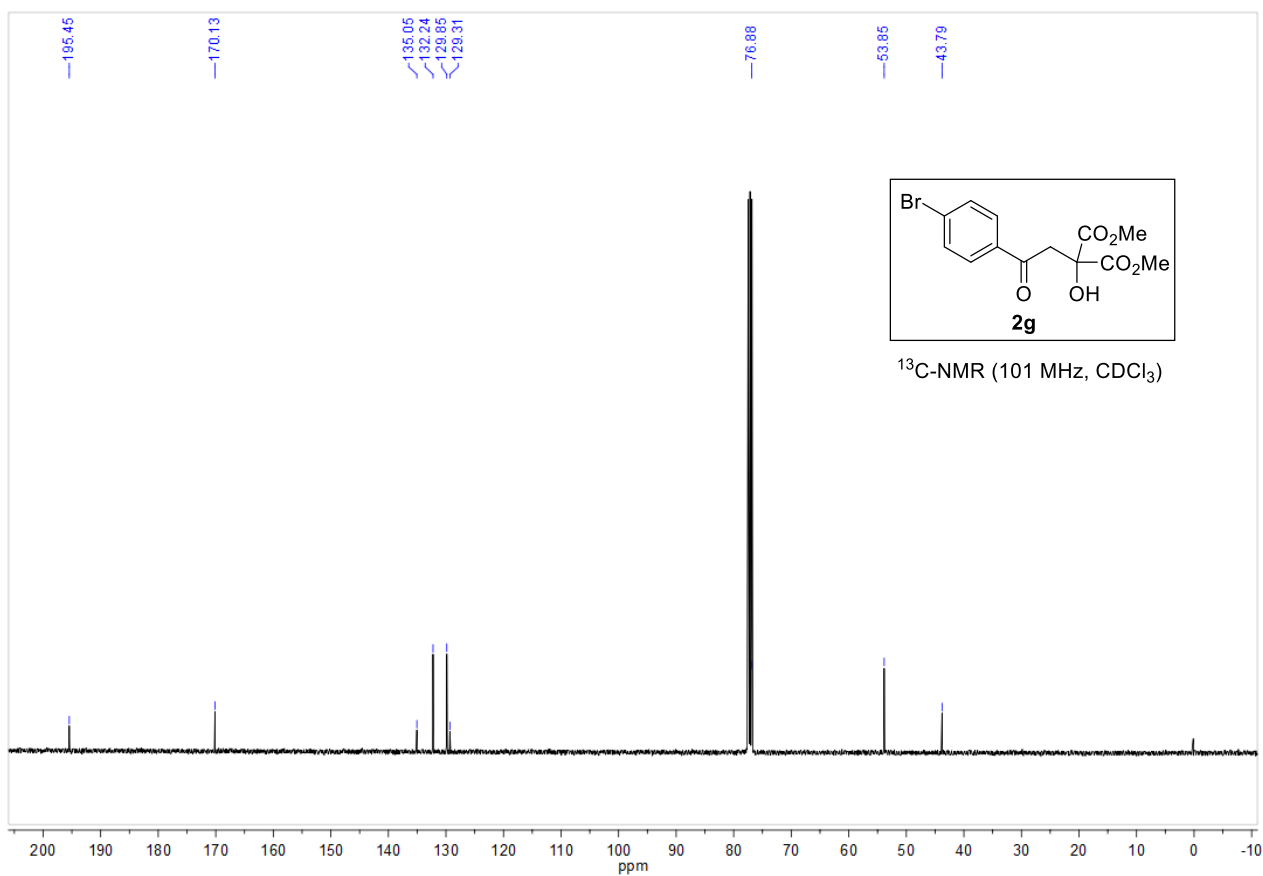

## SUPPORTING INFORMATION

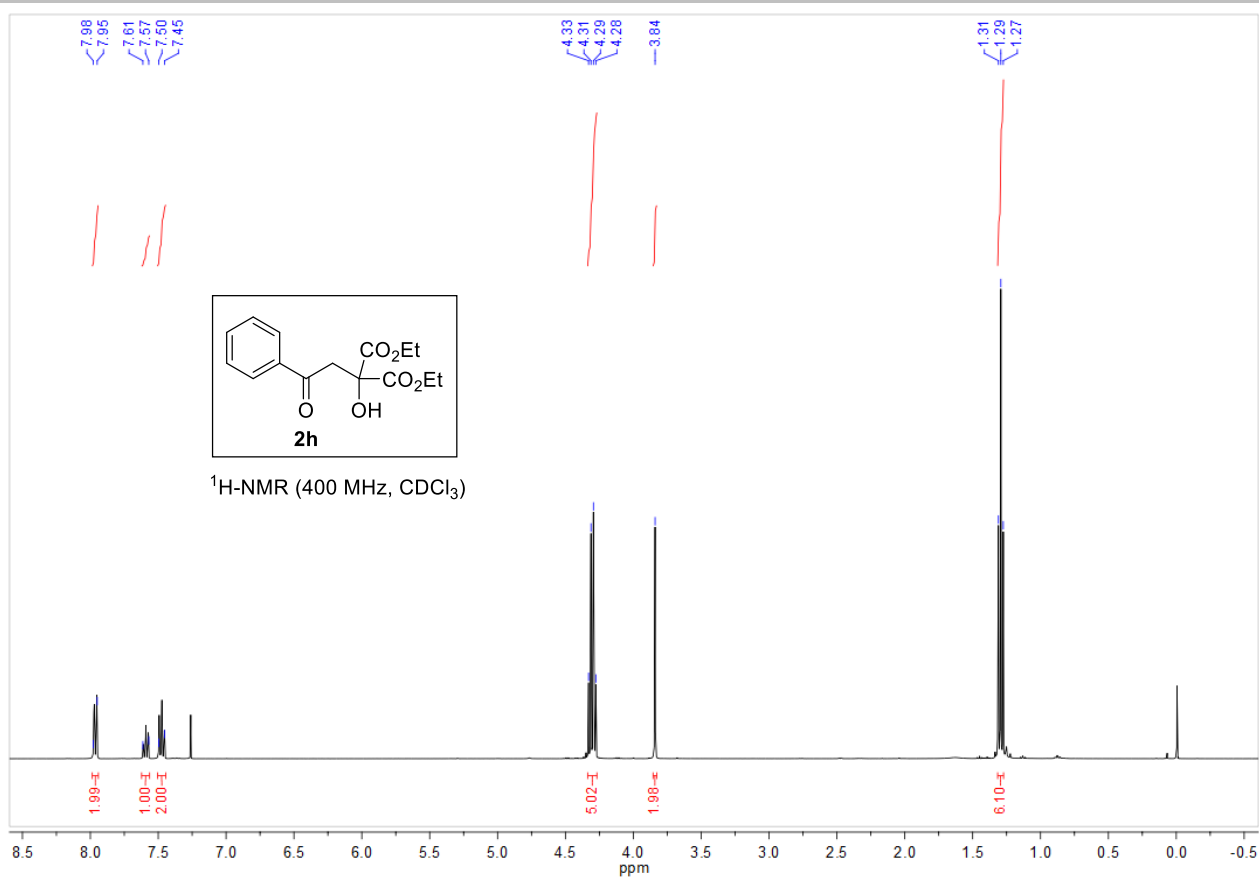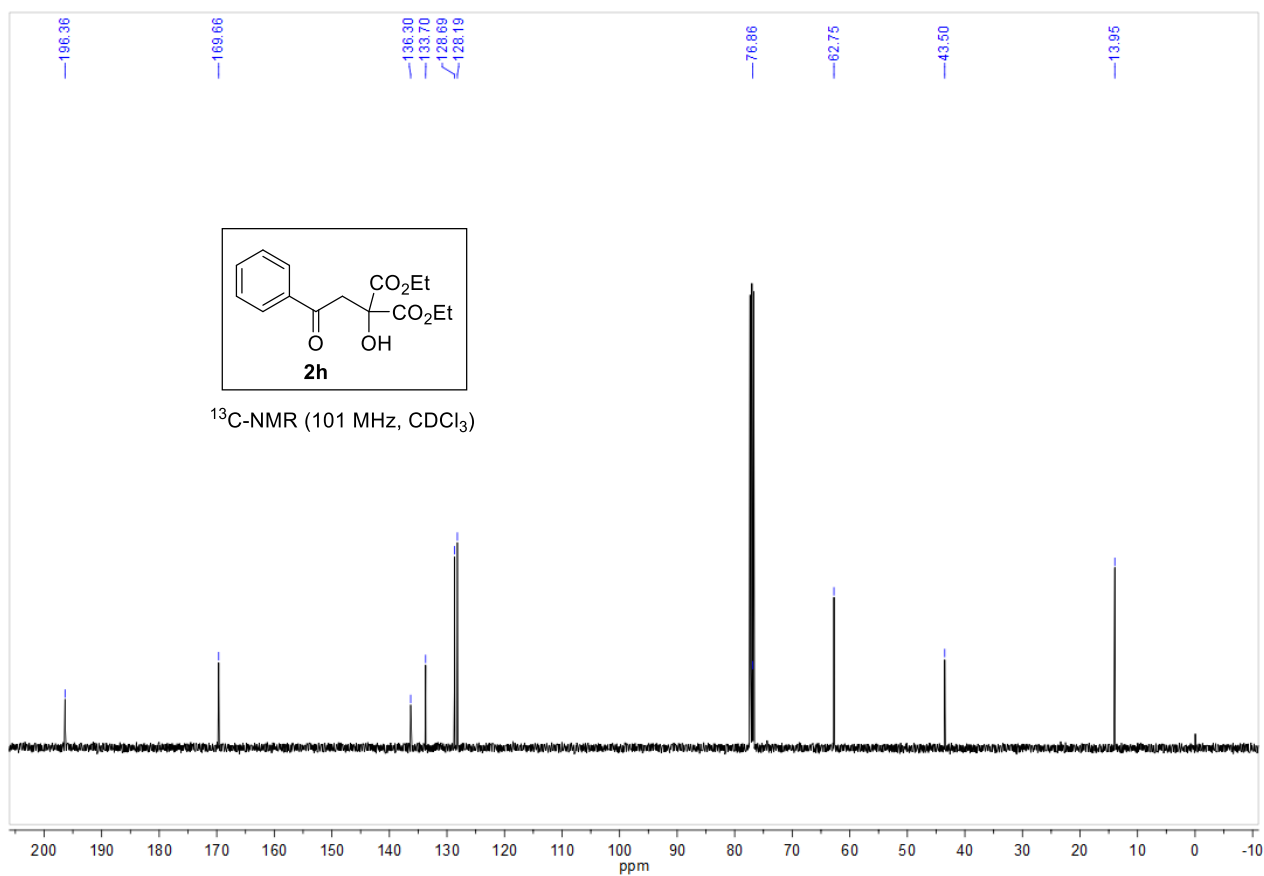

## SUPPORTING INFORMATION

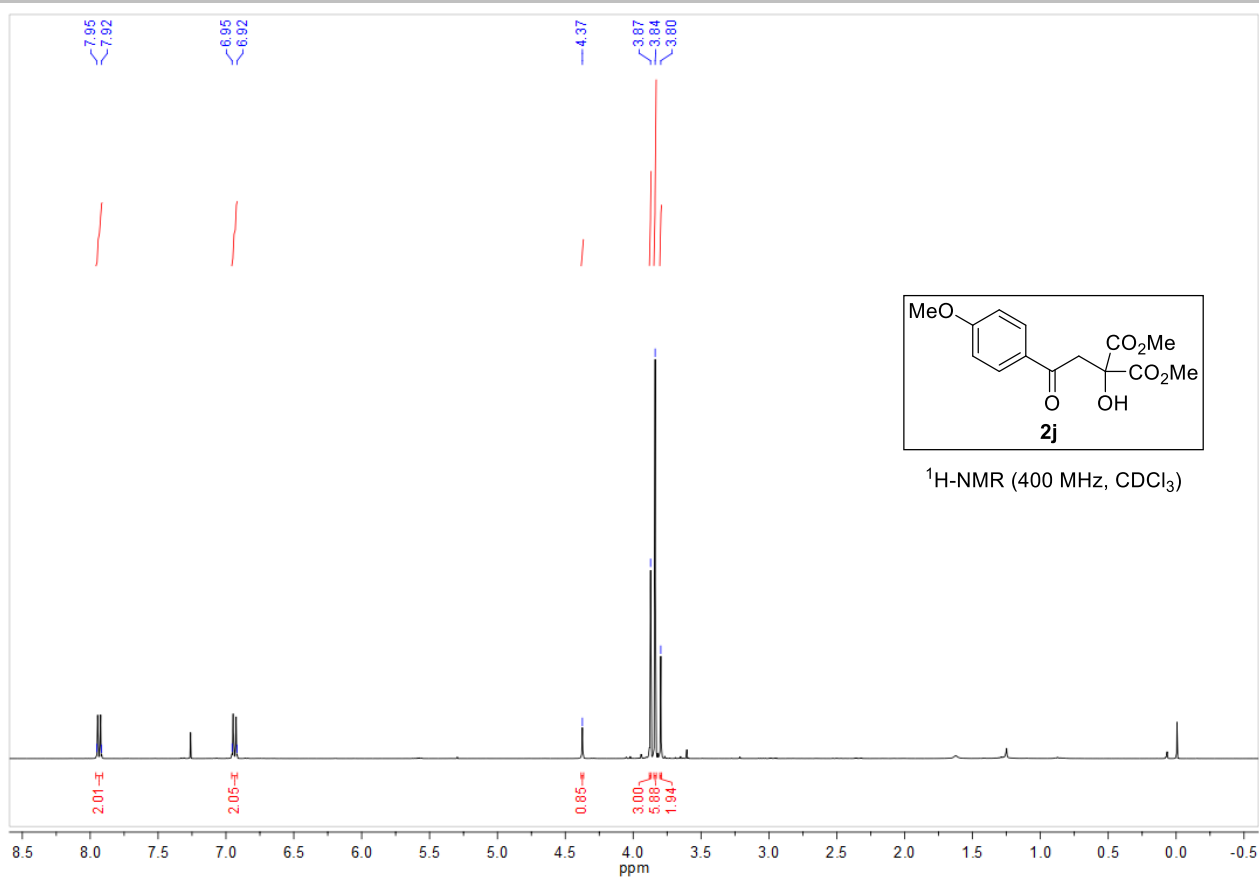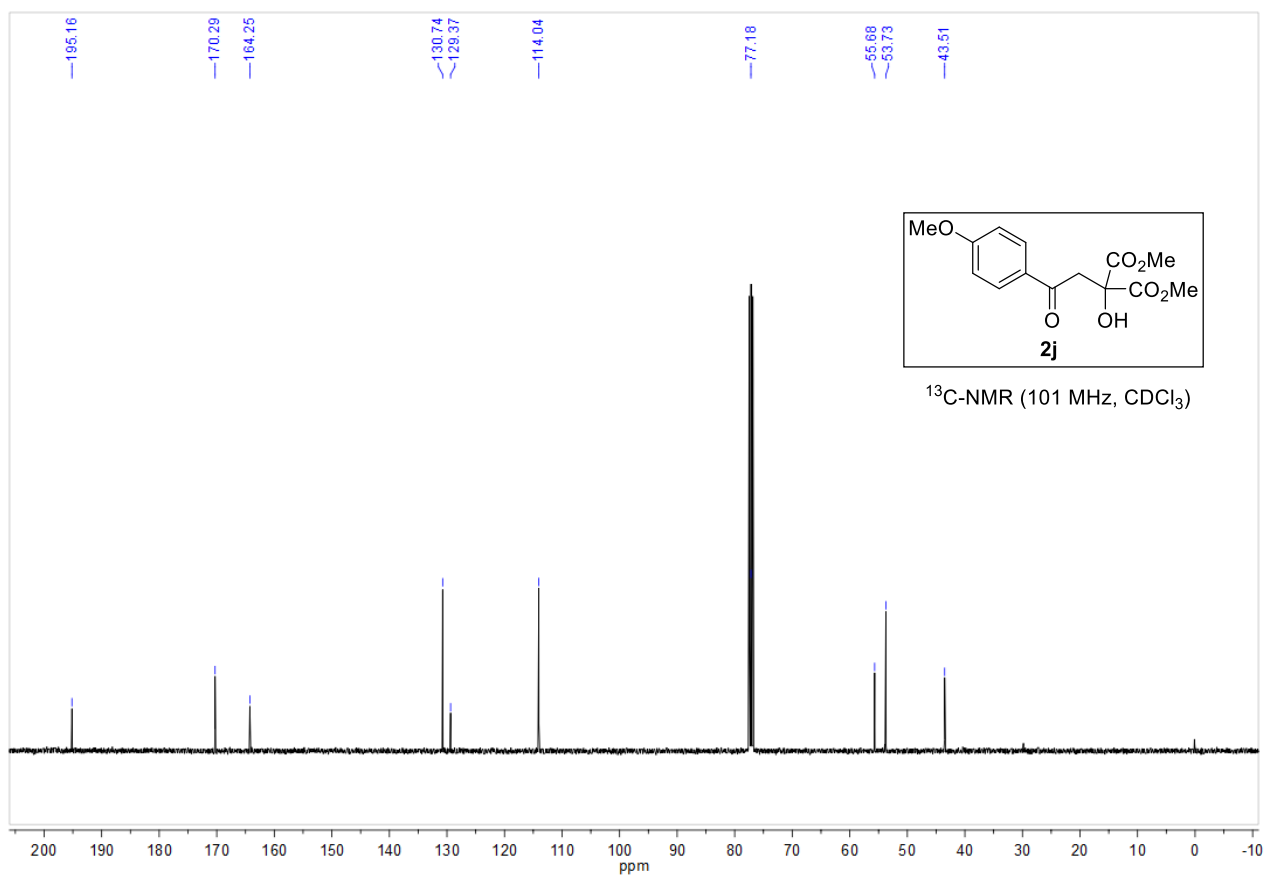



## SUPPORTING INFORMATION

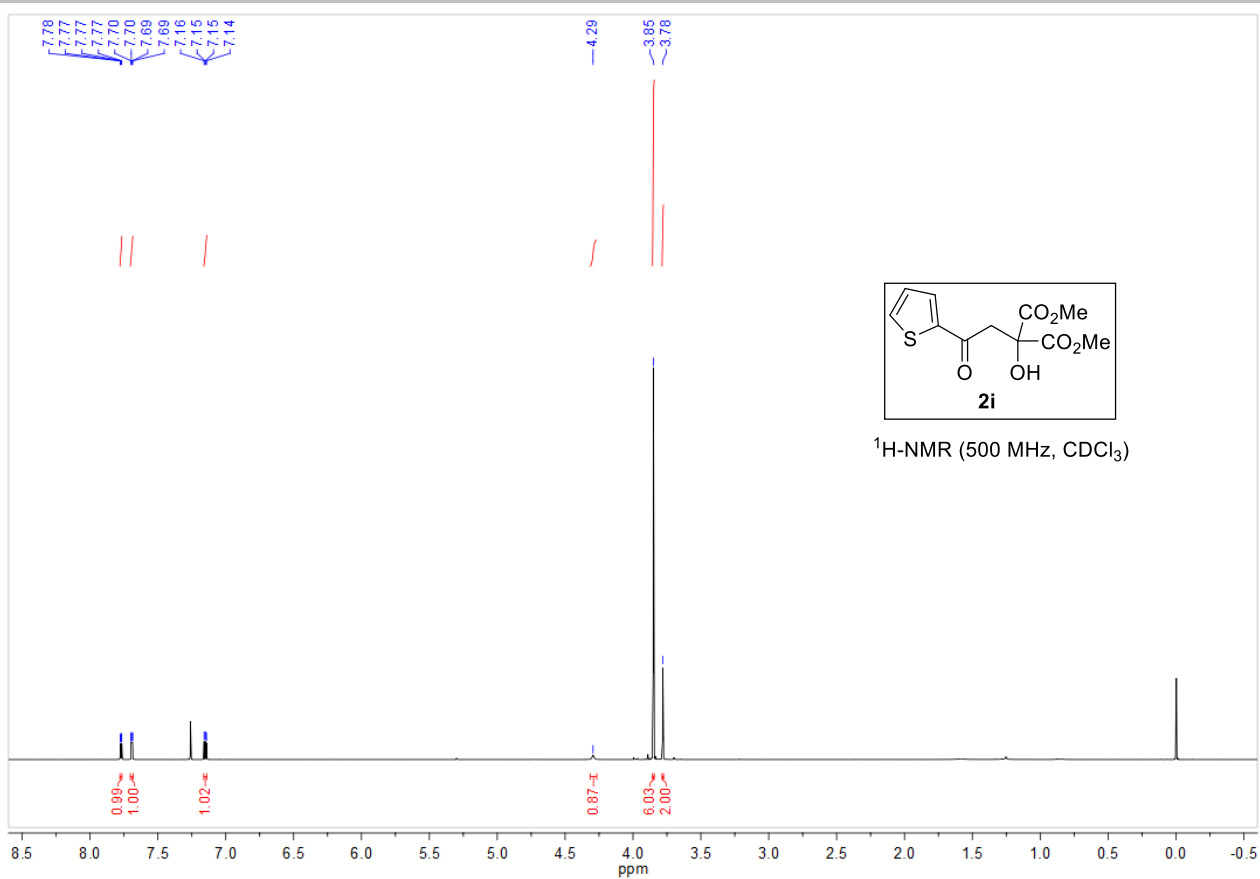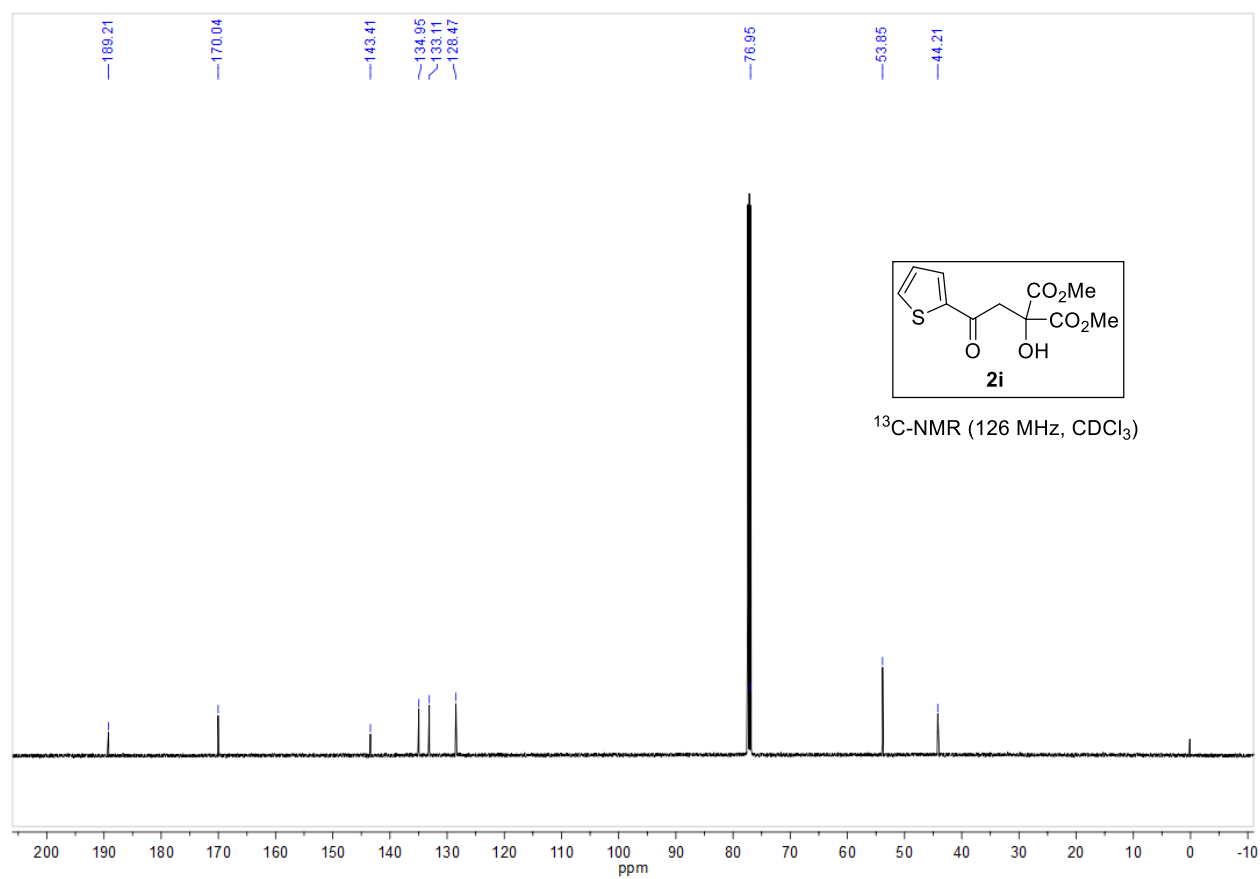

## SUPPORTING INFORMATION

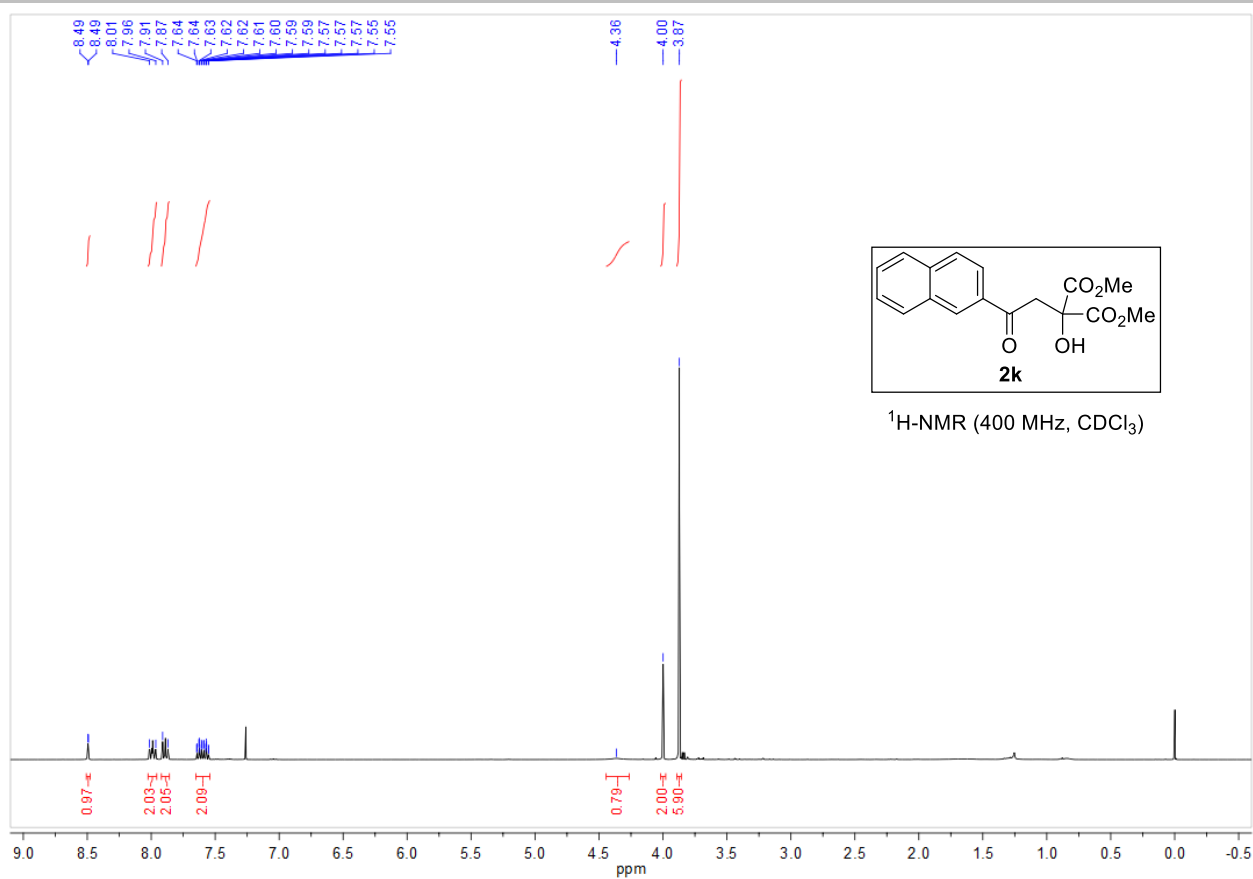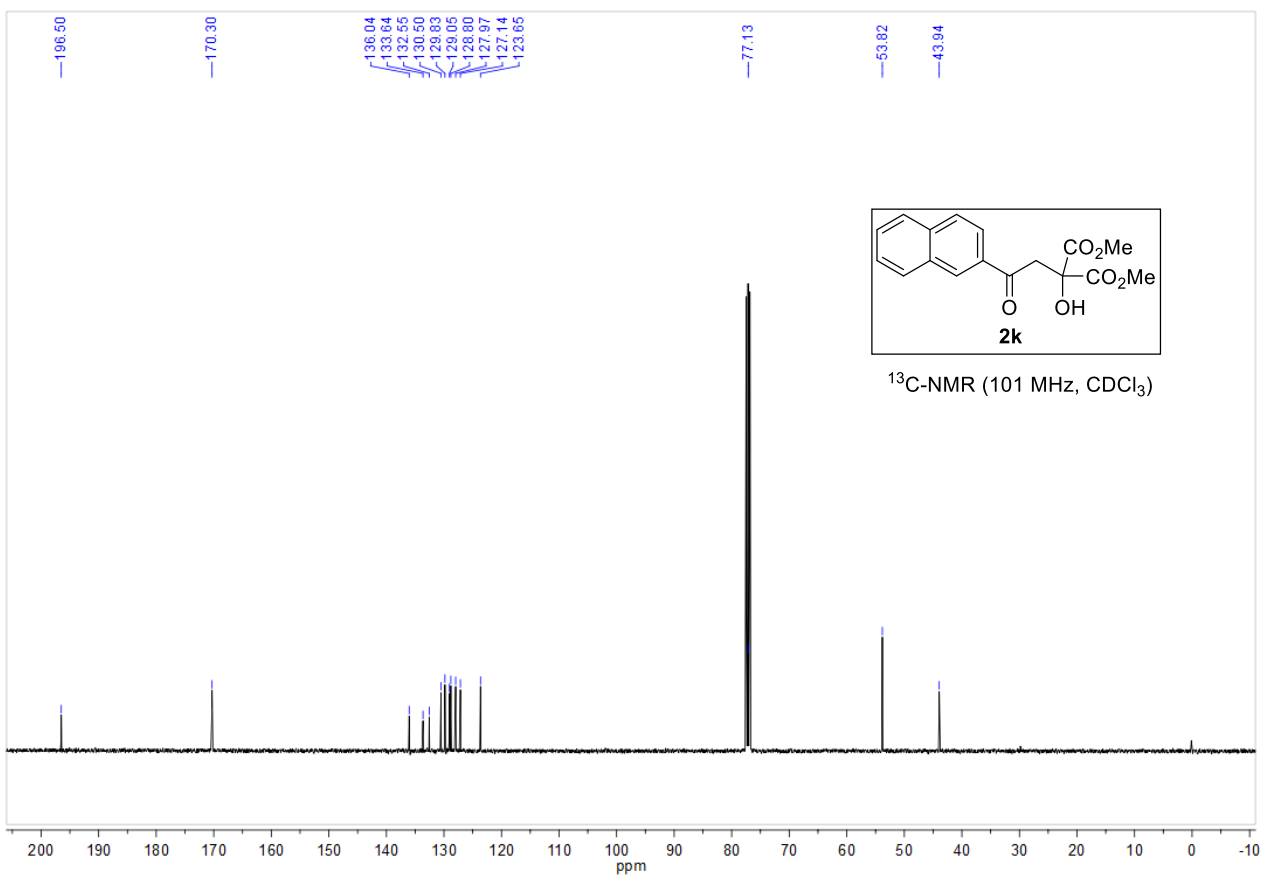

## SUPPORTING INFORMATION

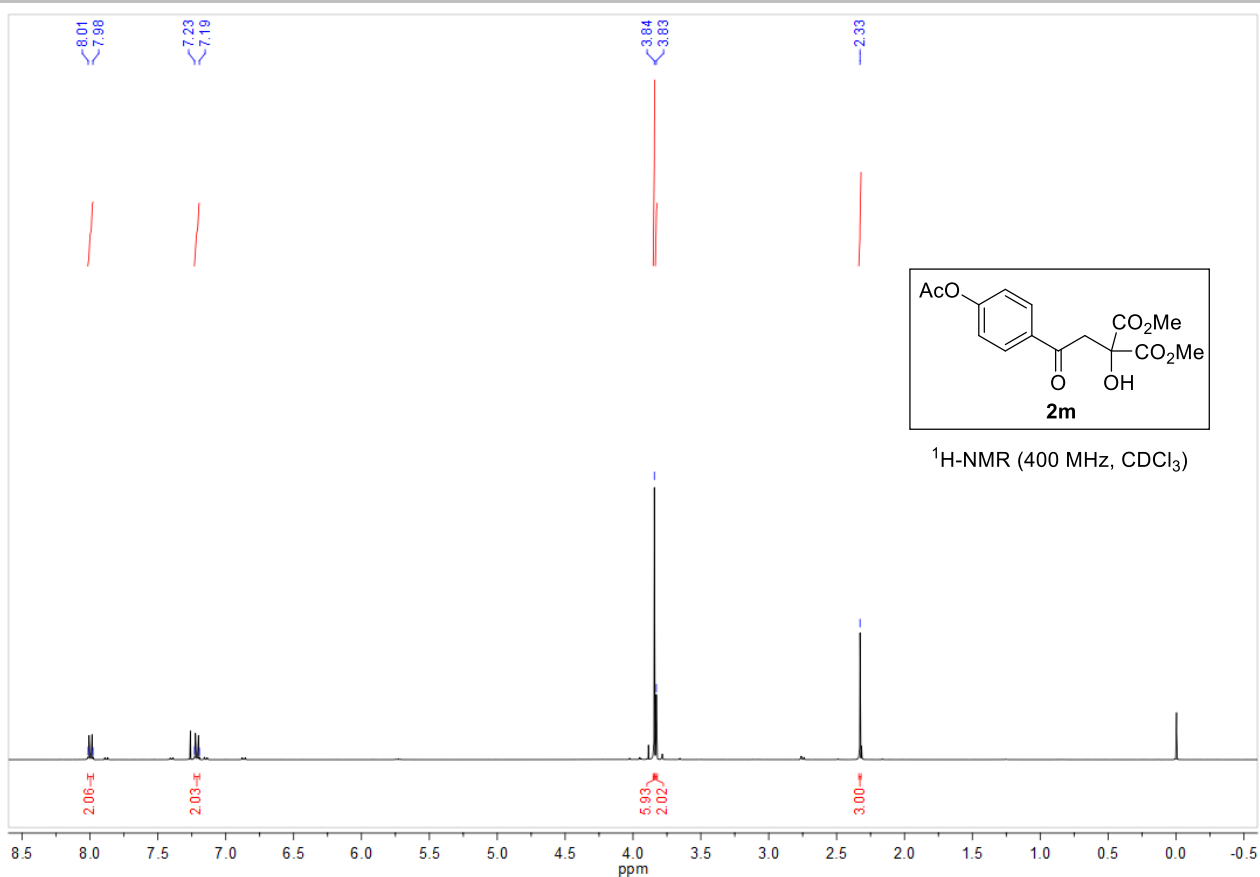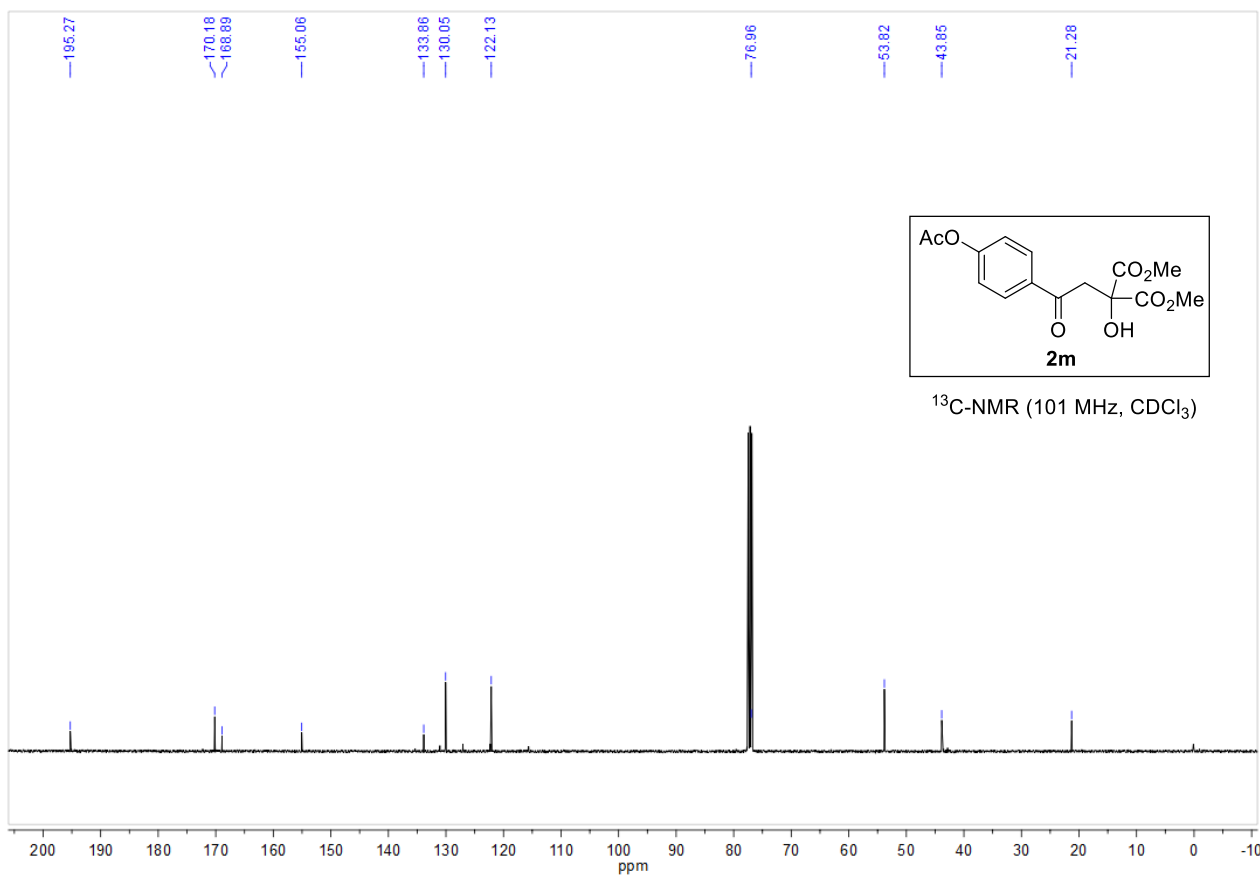

## SUPPORTING INFORMATION

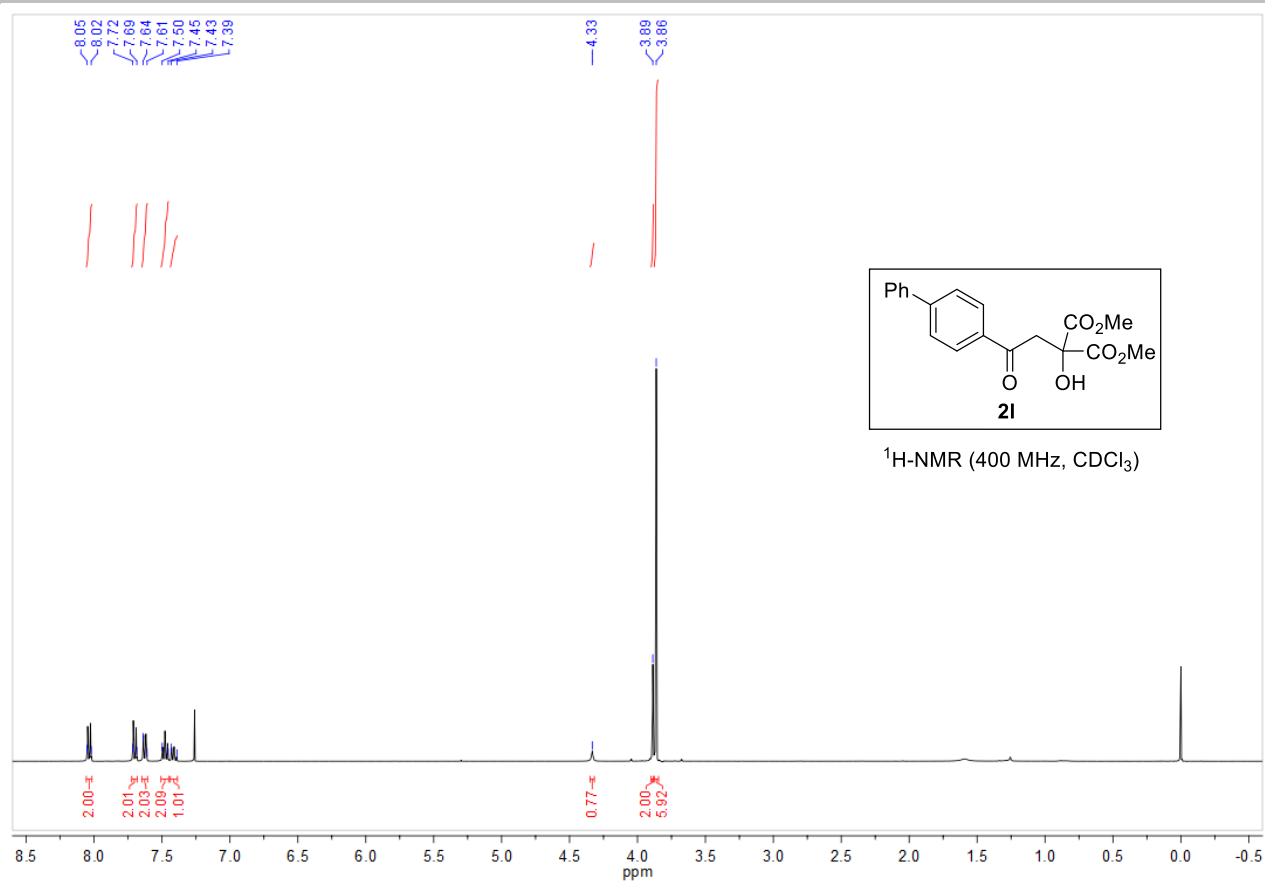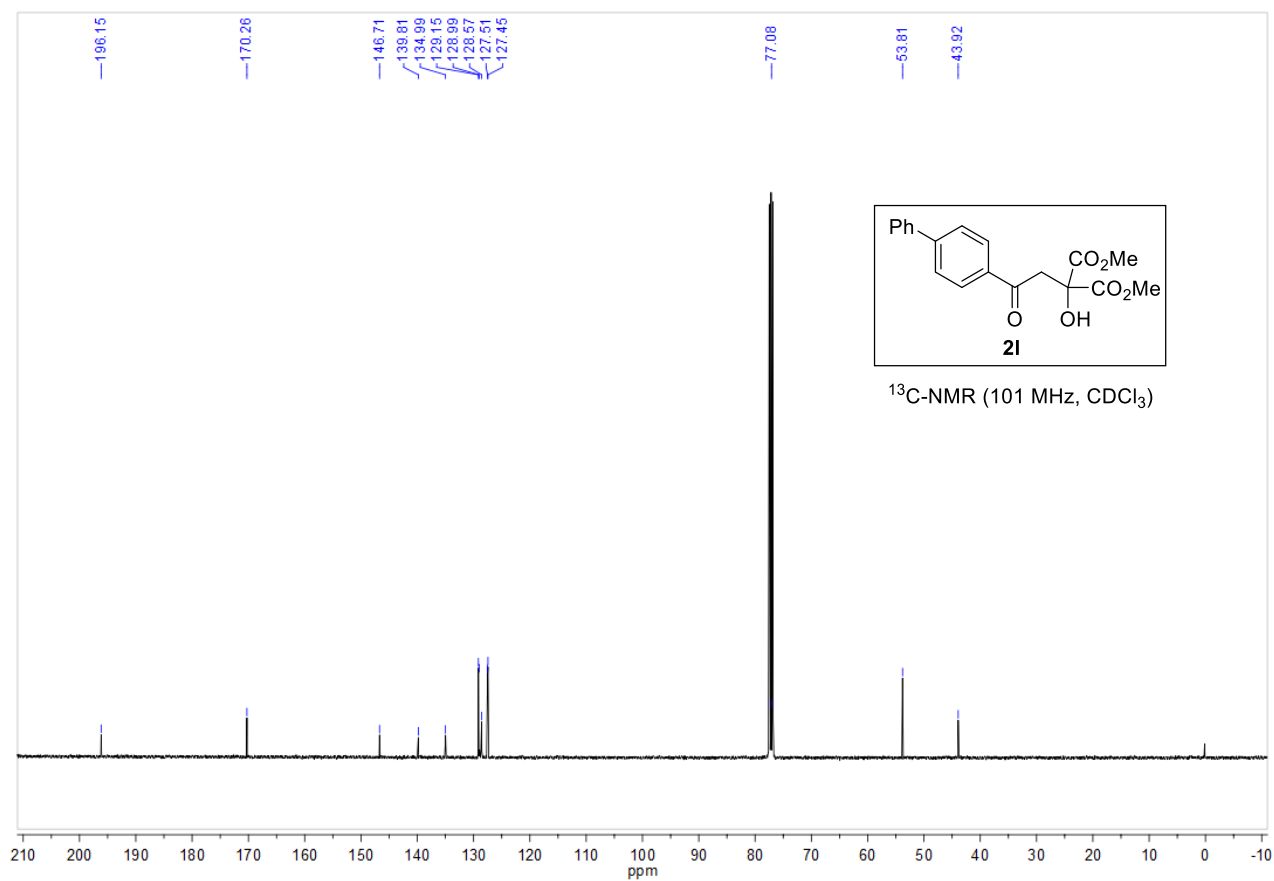

## SUPPORTING INFORMATION

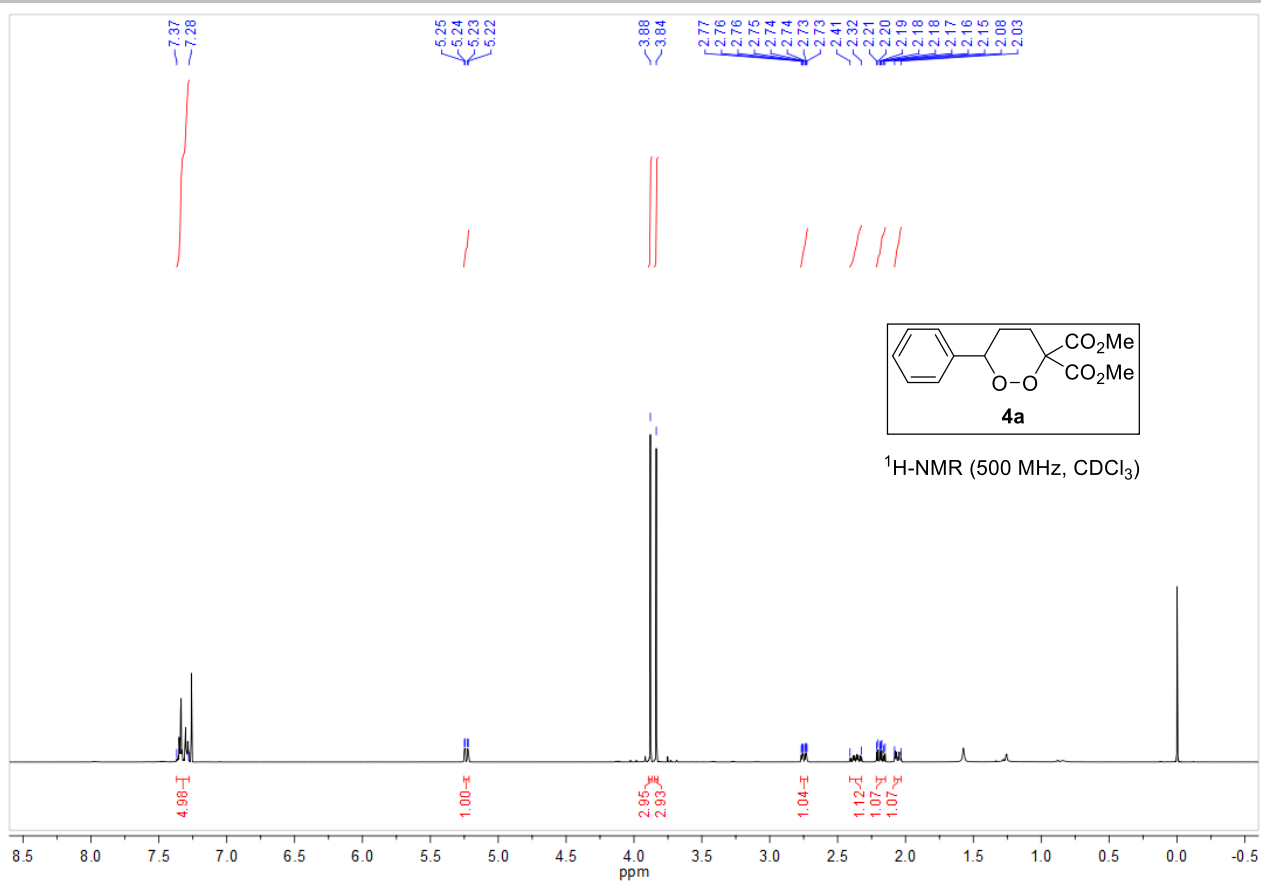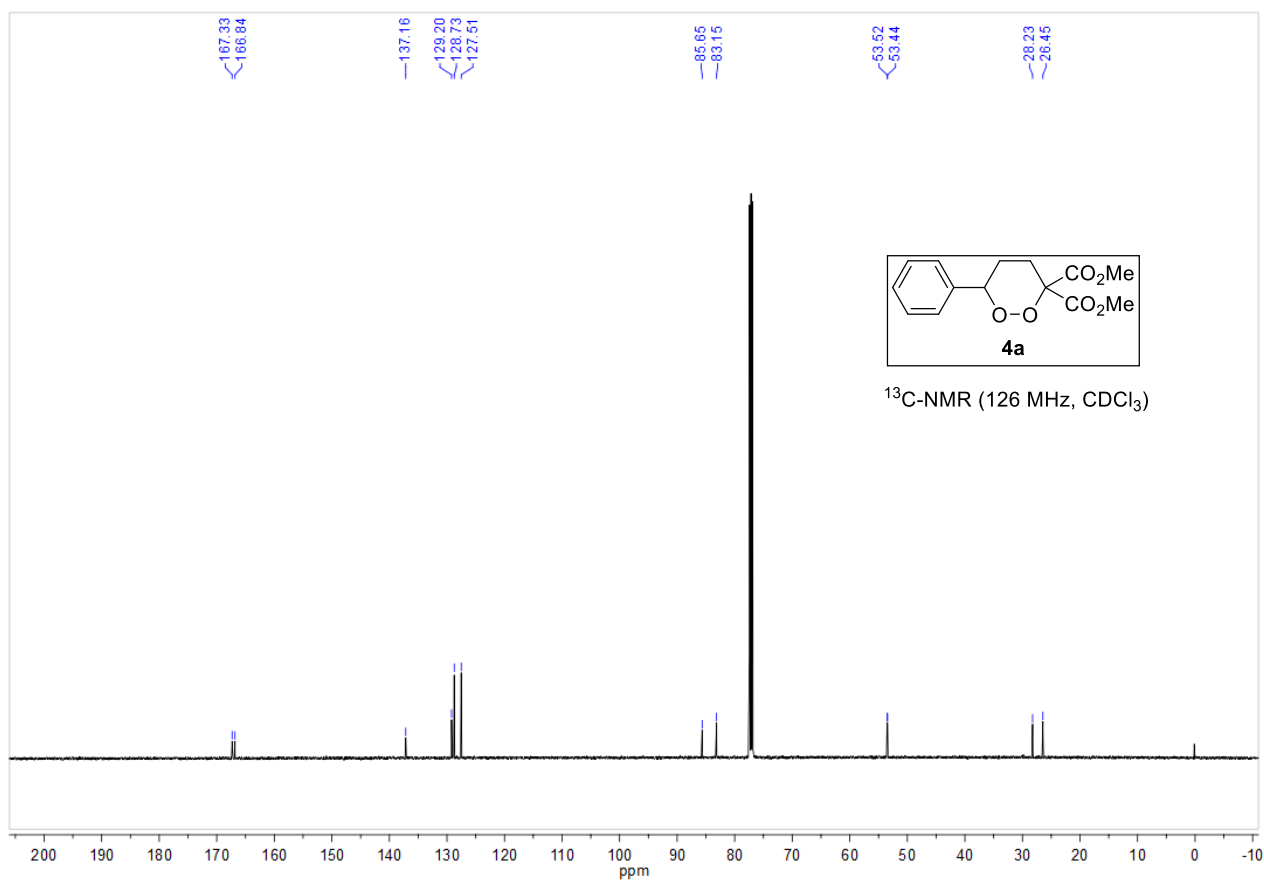

## SUPPORTING INFORMATION

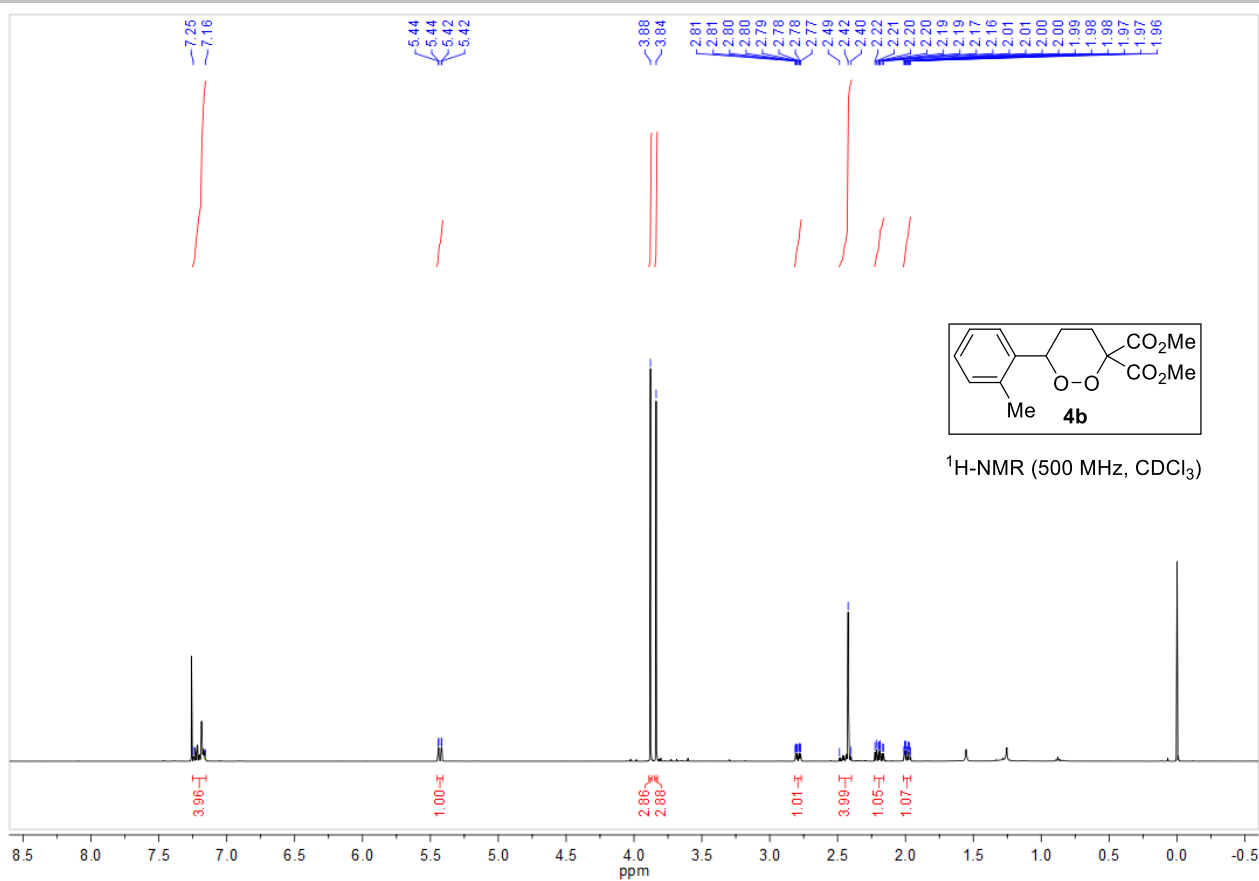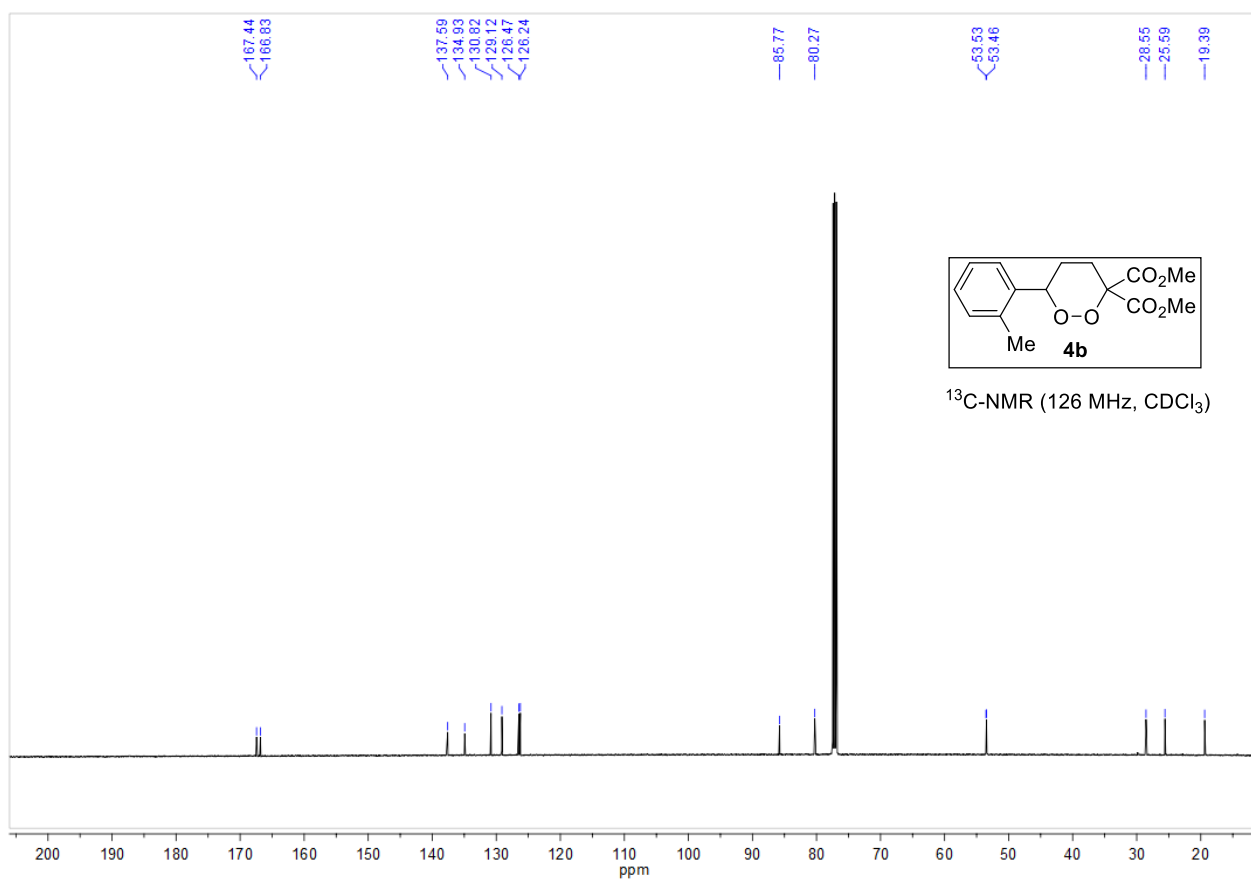

## SUPPORTING INFORMATION

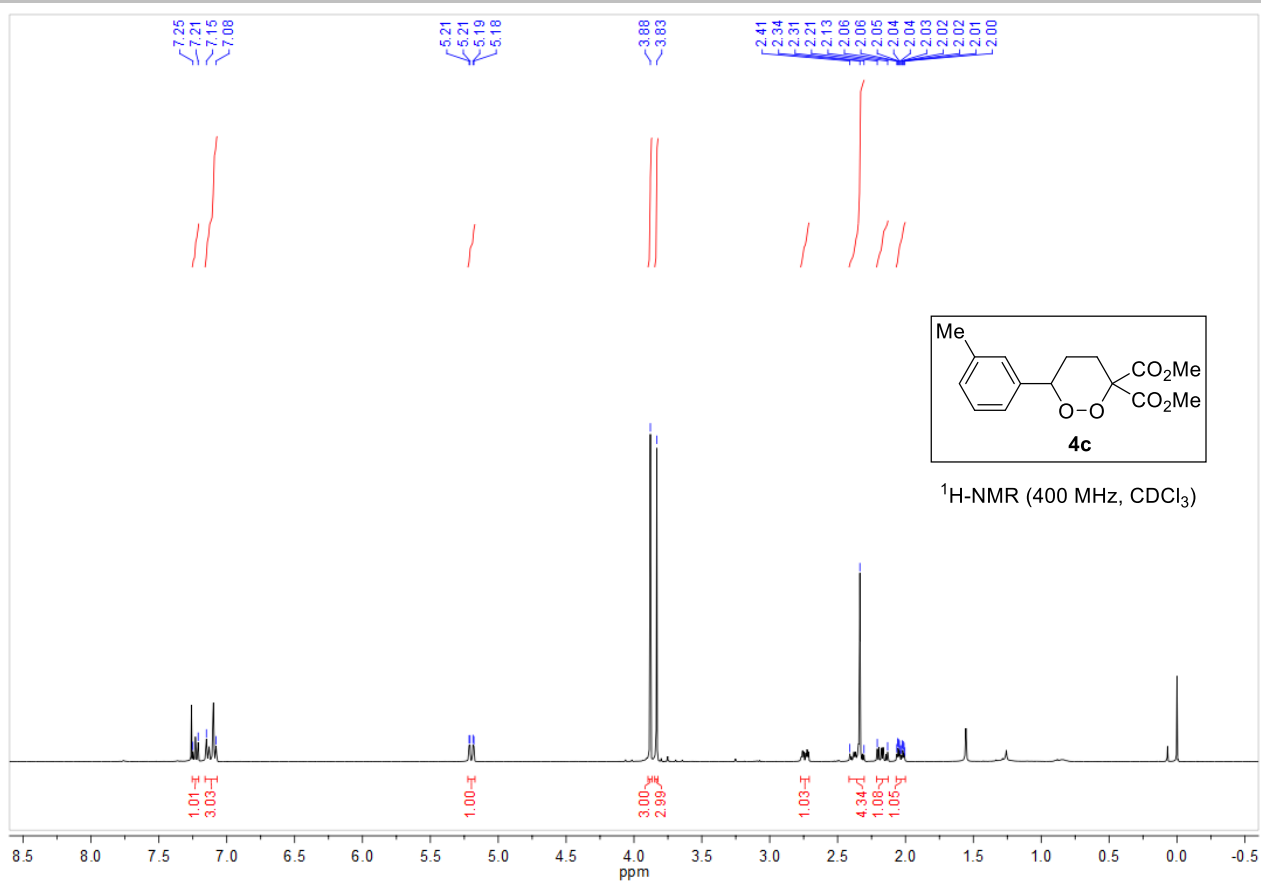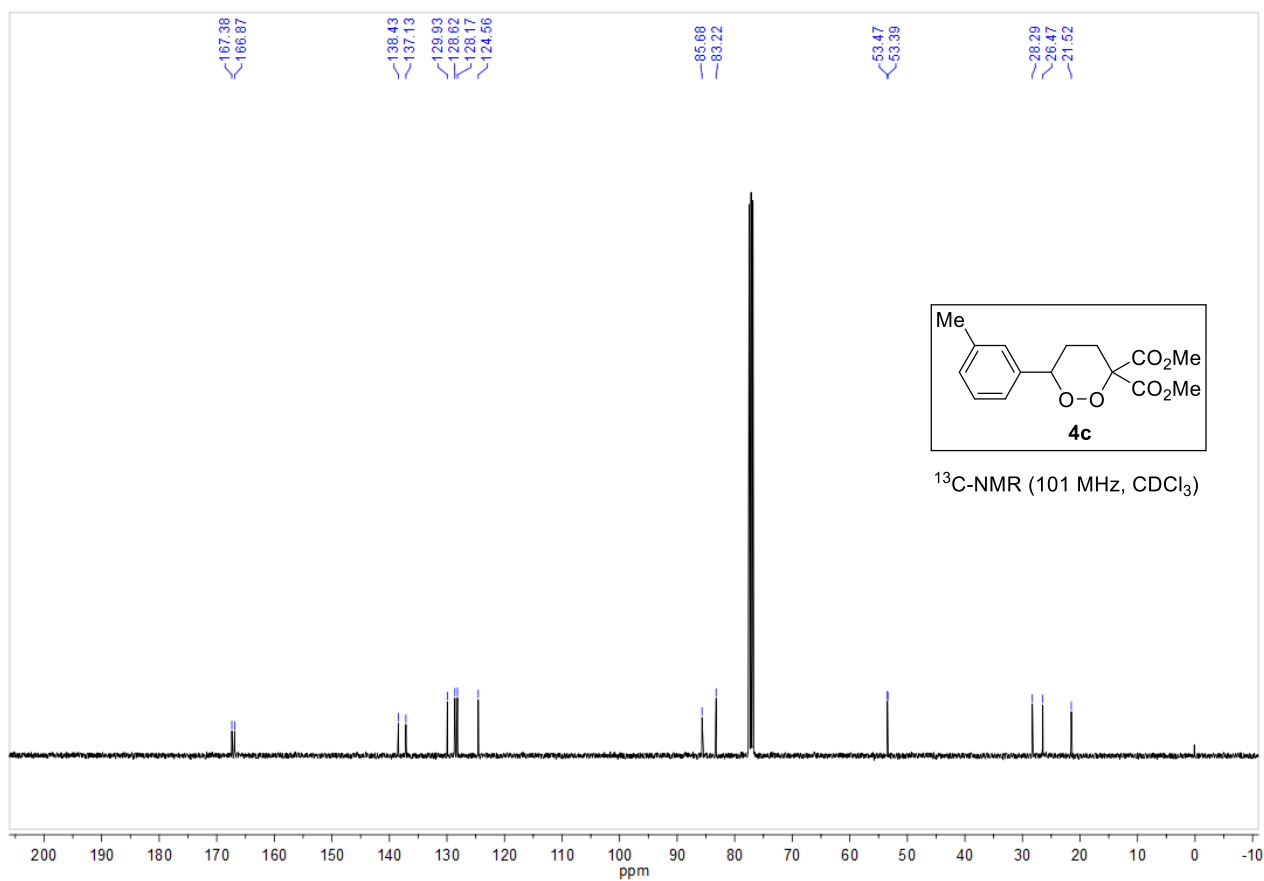

## SUPPORTING INFORMATION

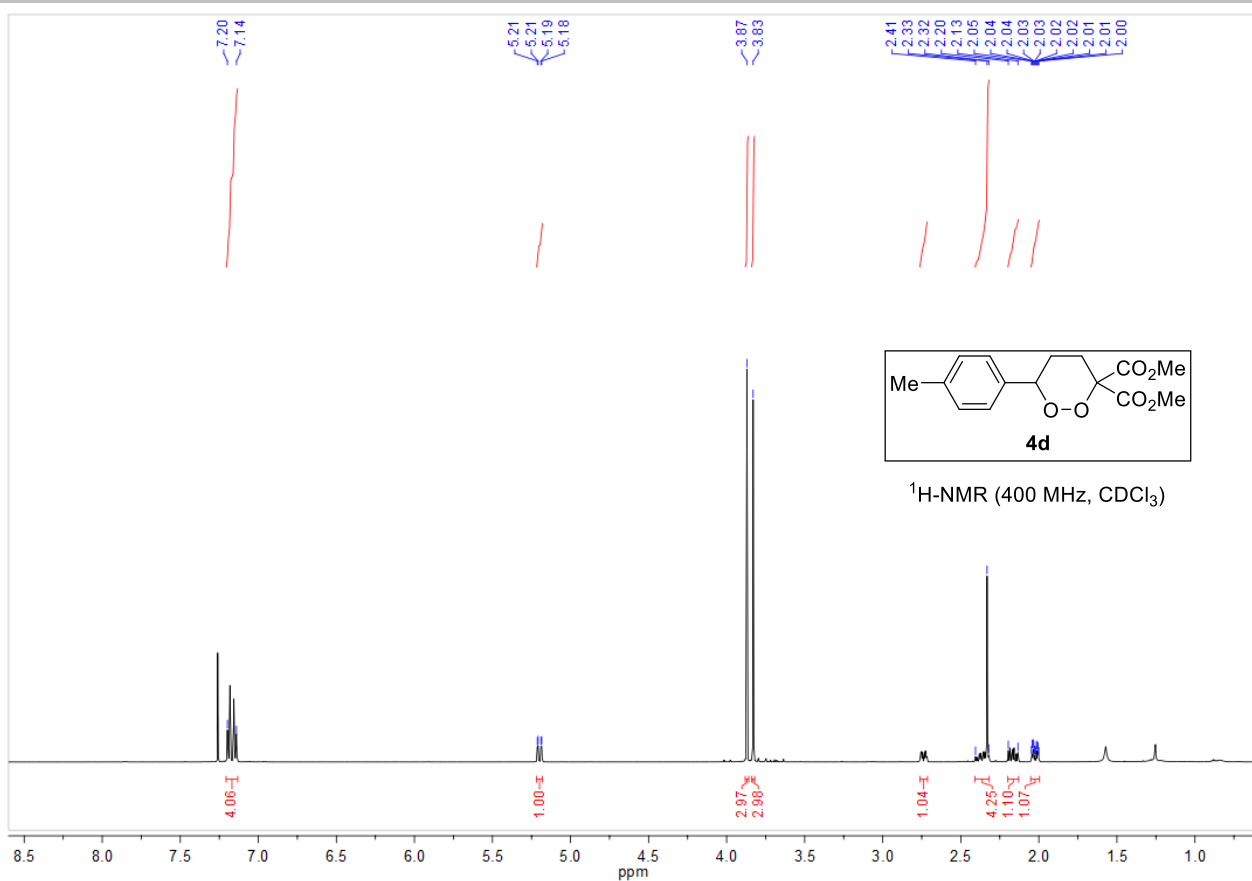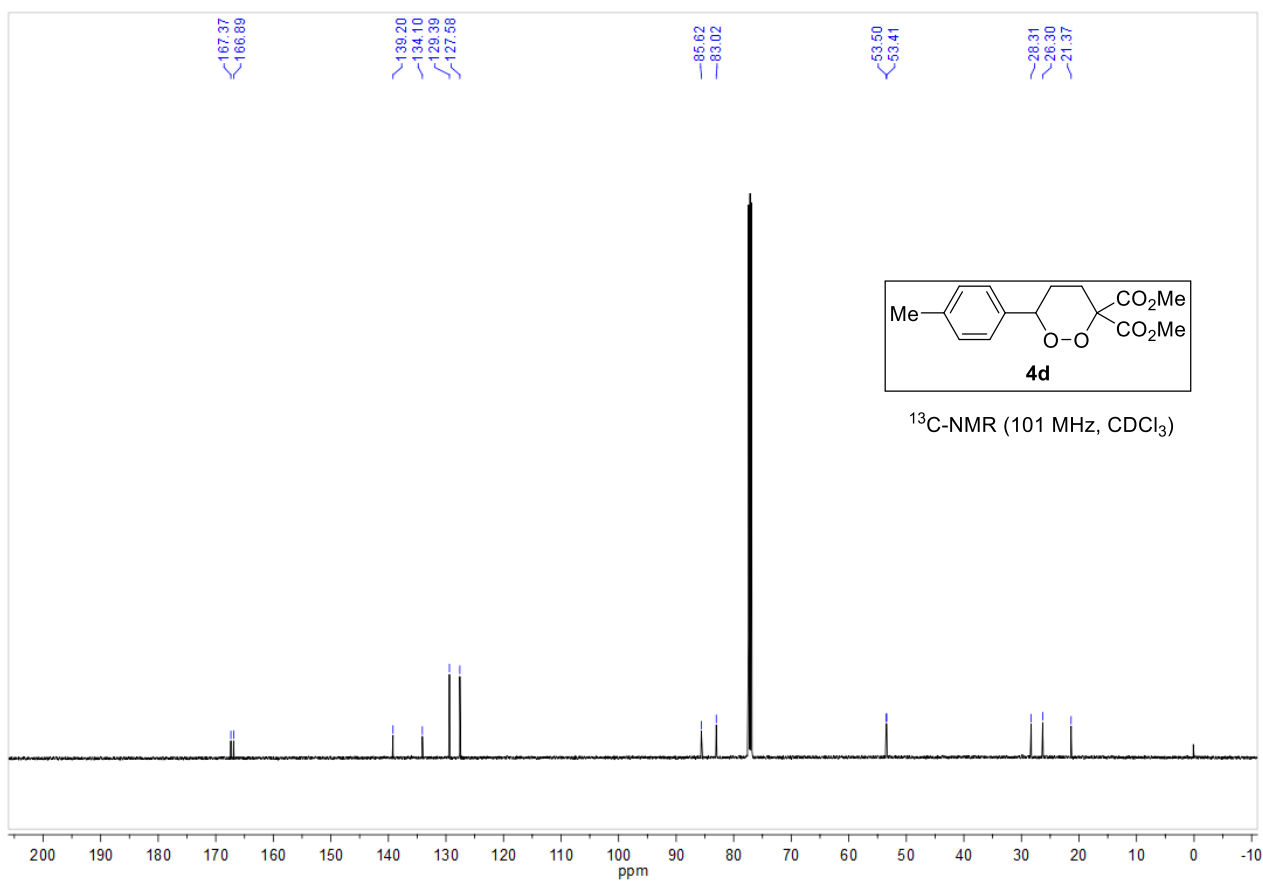



## SUPPORTING INFORMATION

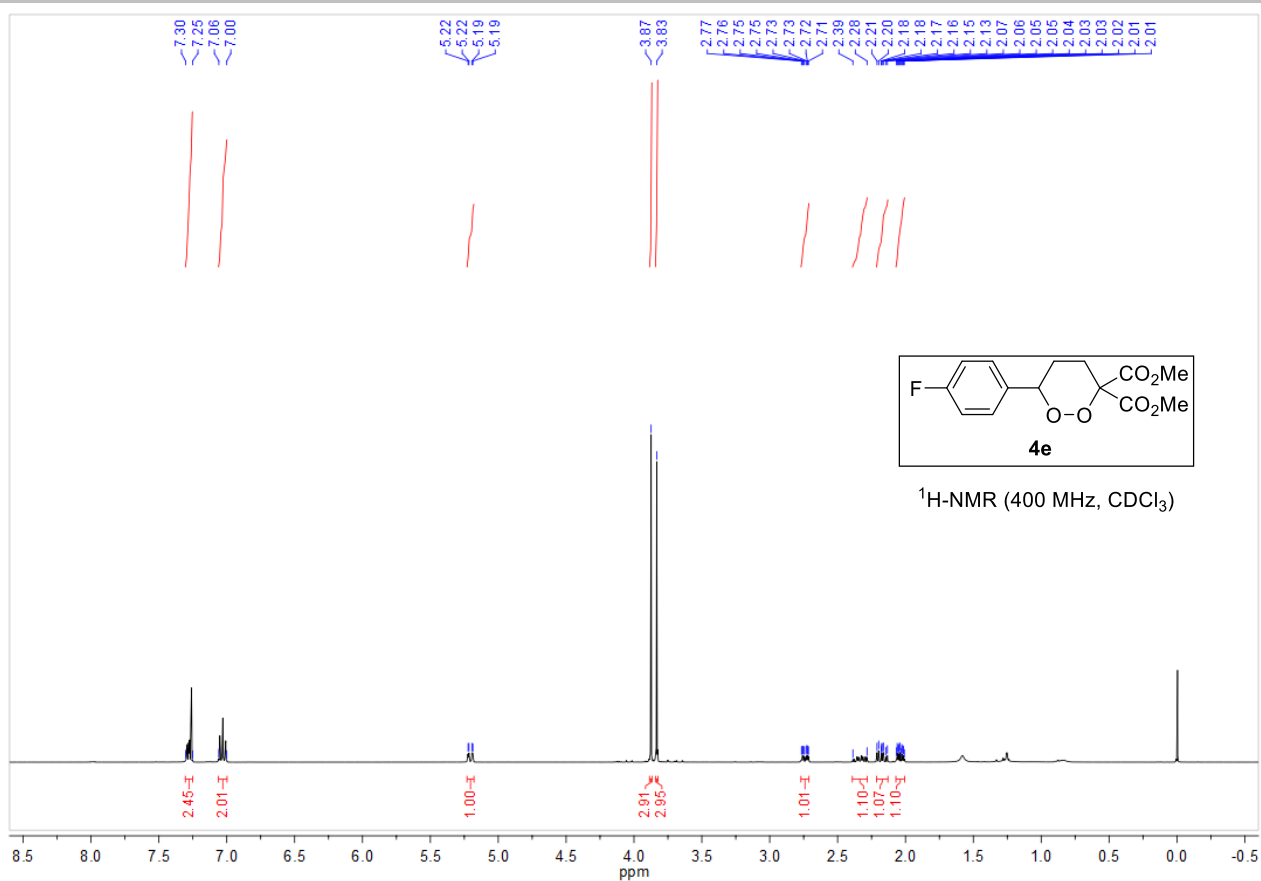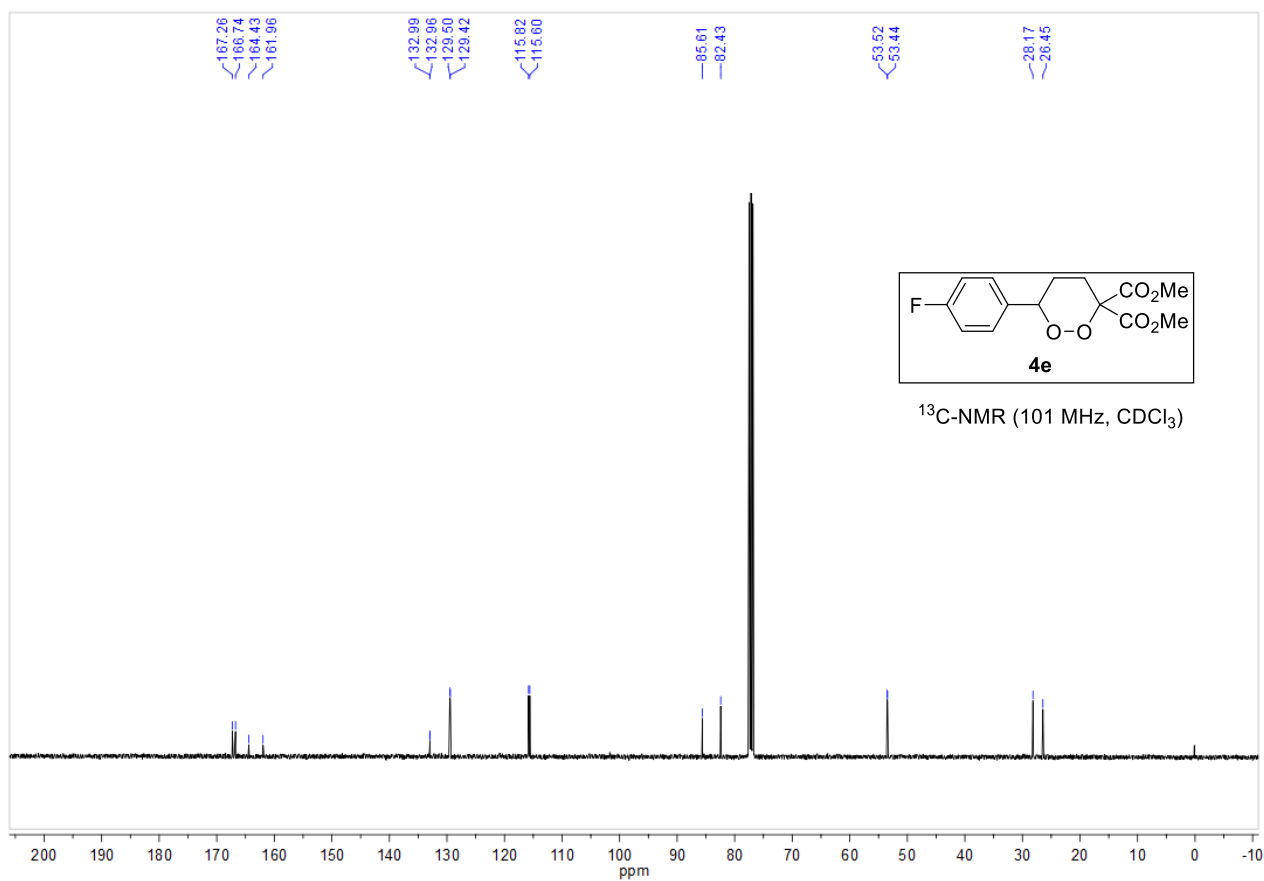

## SUPPORTING INFORMATION

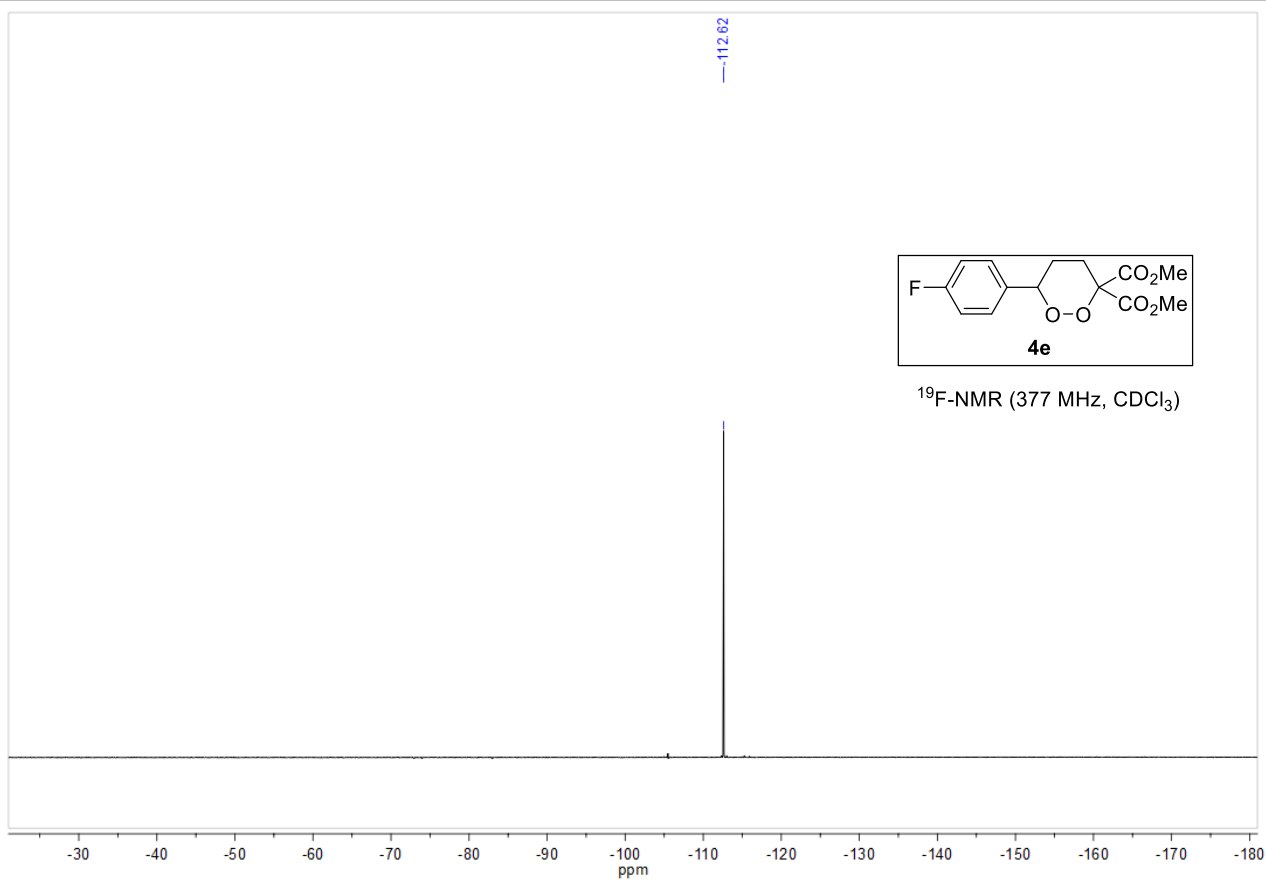

## SUPPORTING INFORMATION

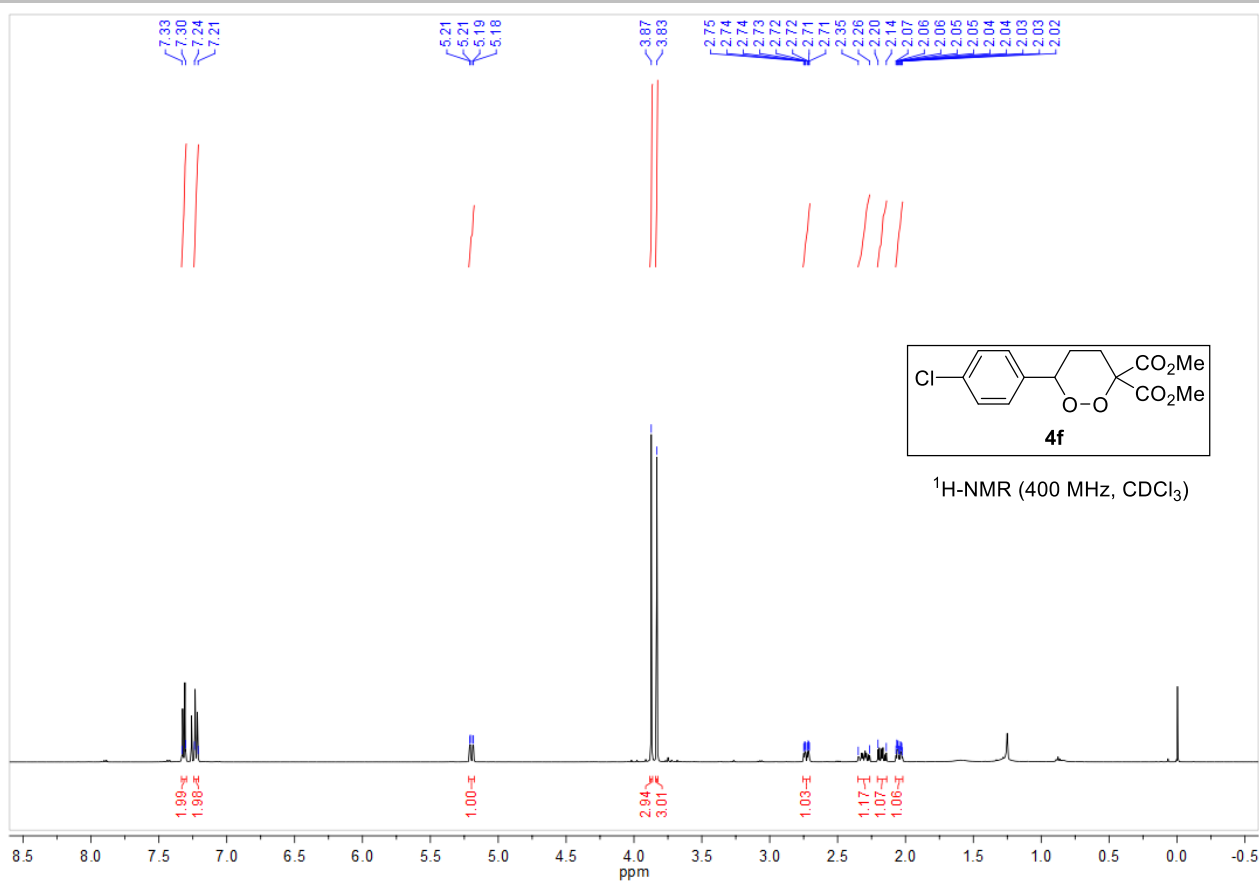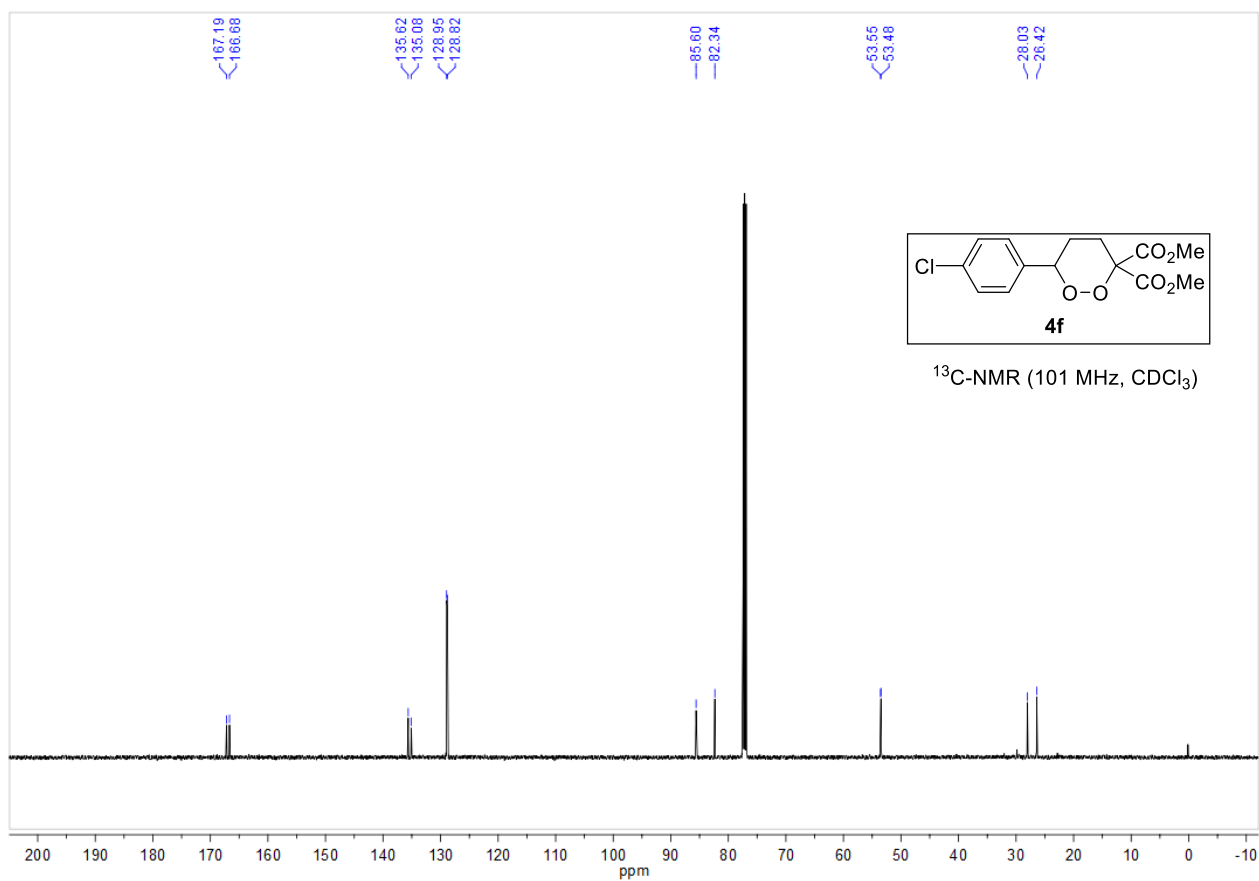

## SUPPORTING INFORMATION

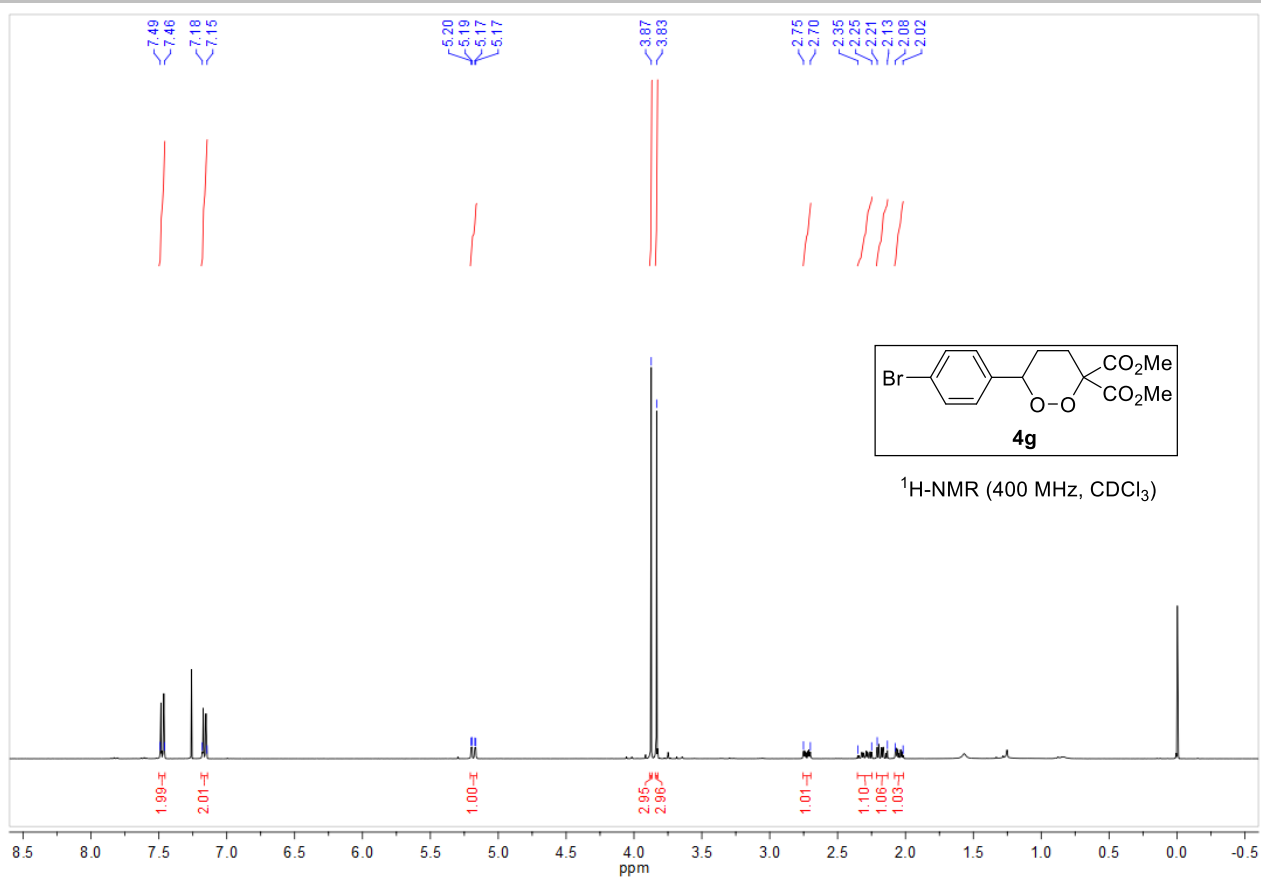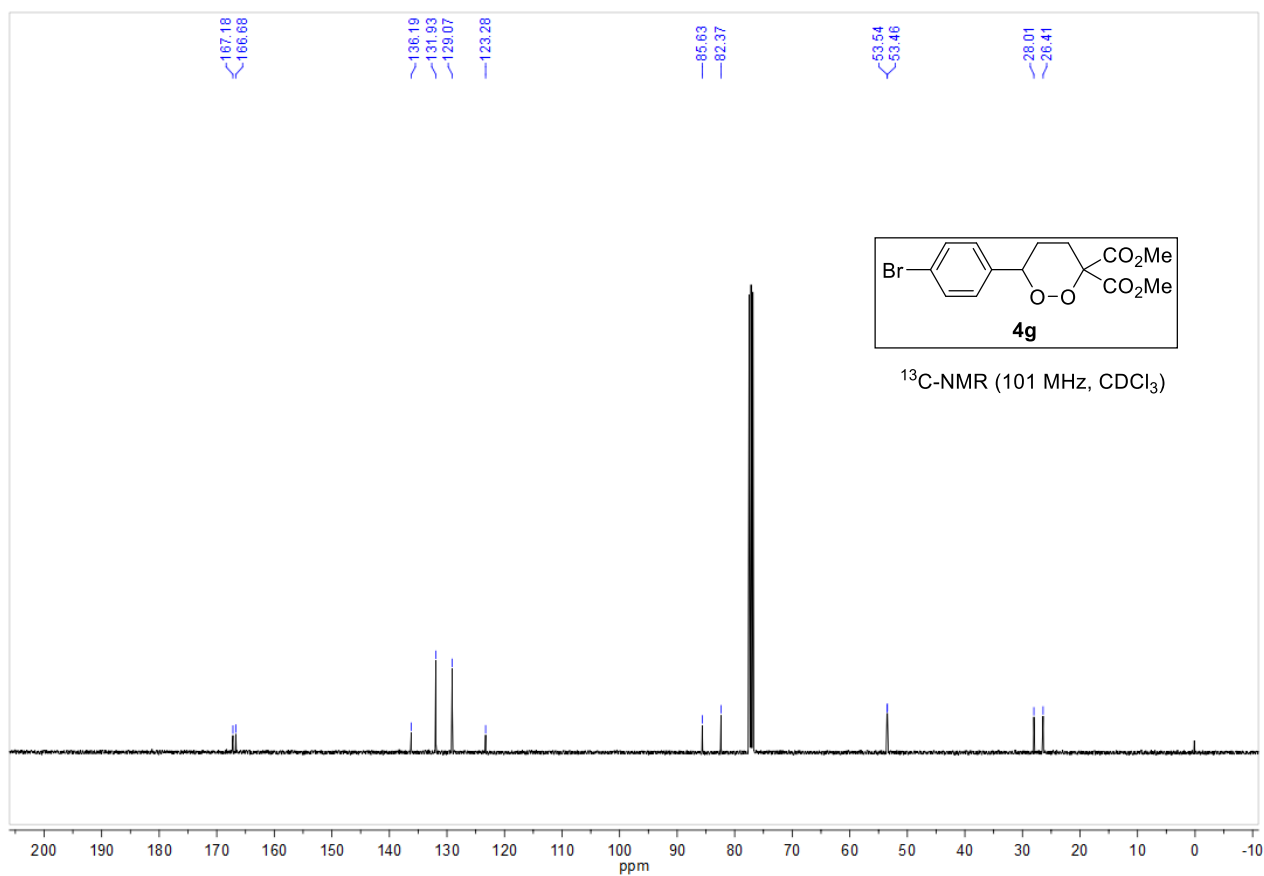

## SUPPORTING INFORMATION

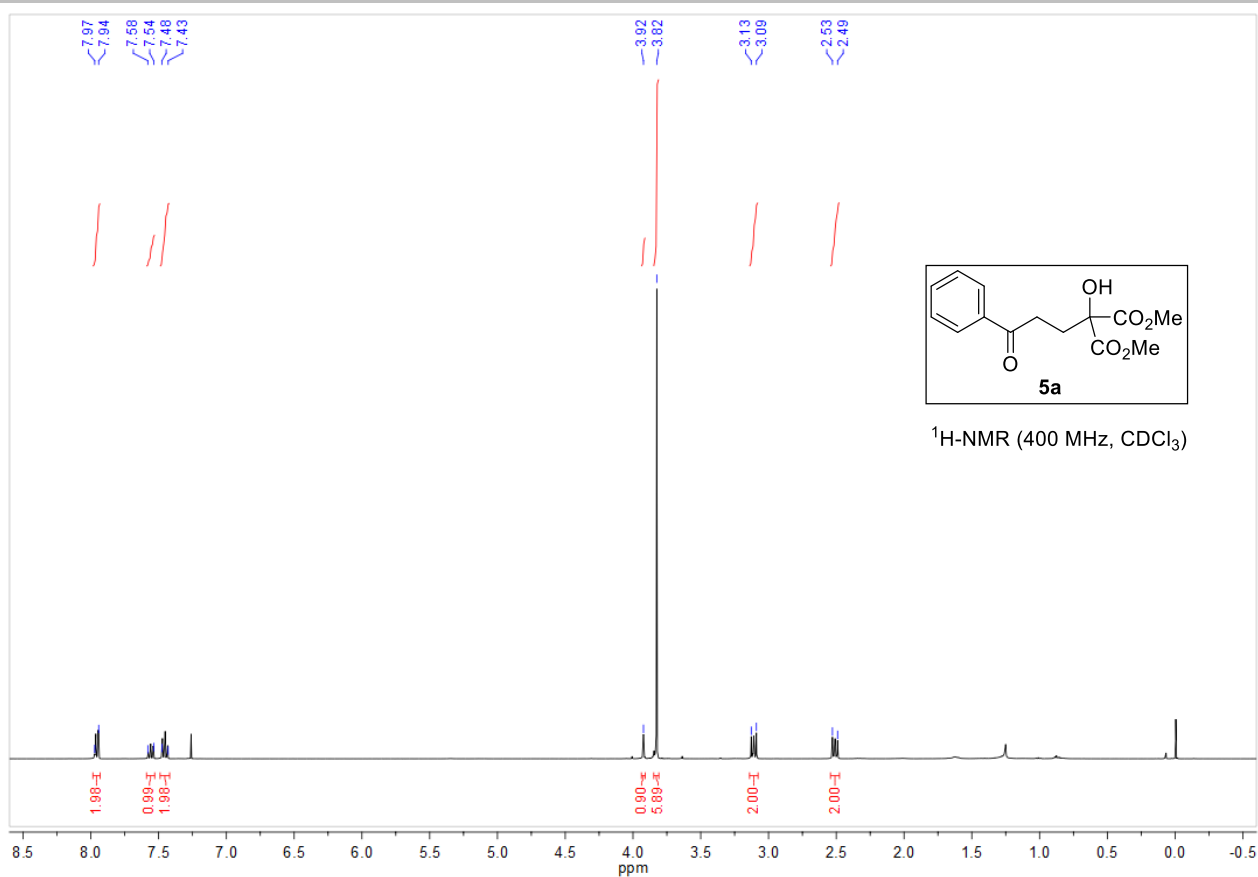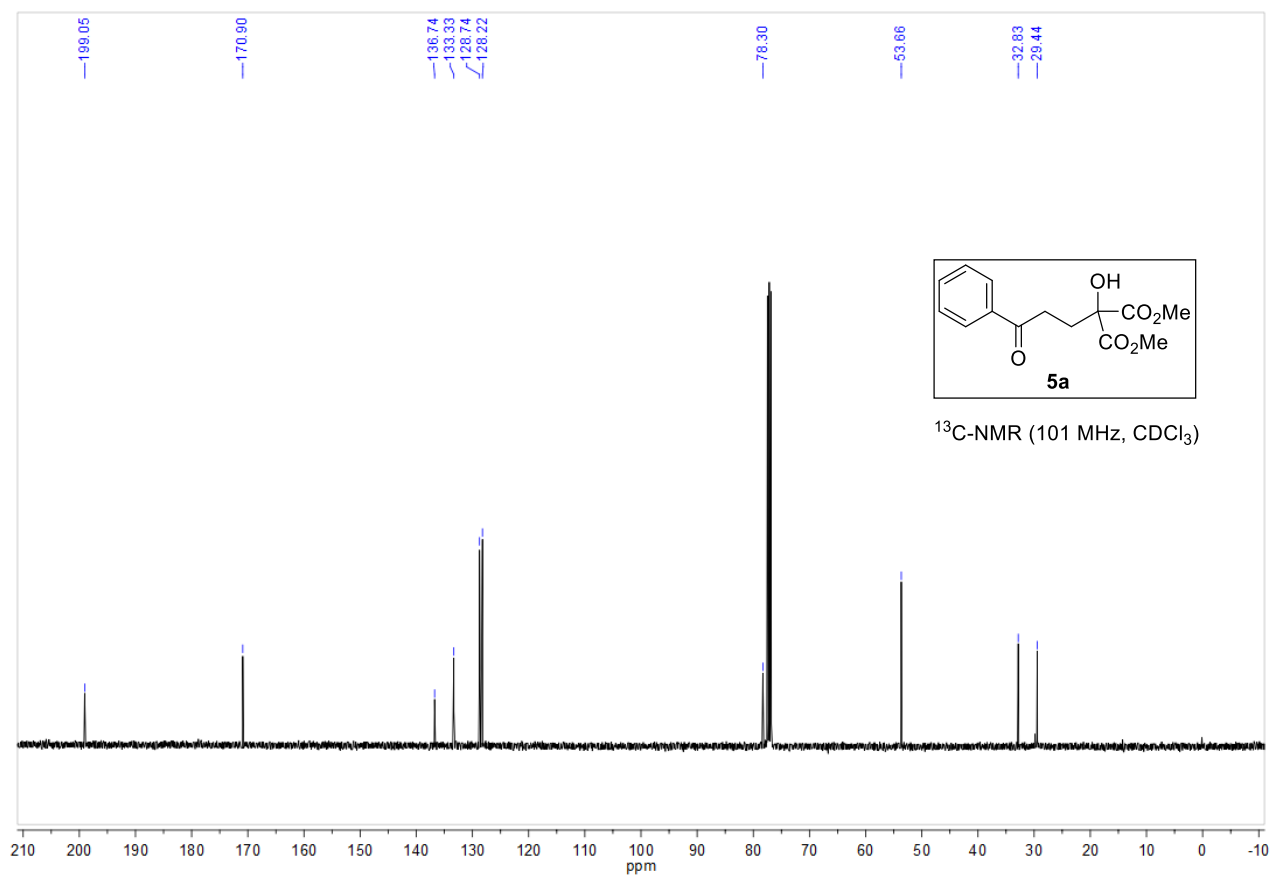

## SUPPORTING INFORMATION

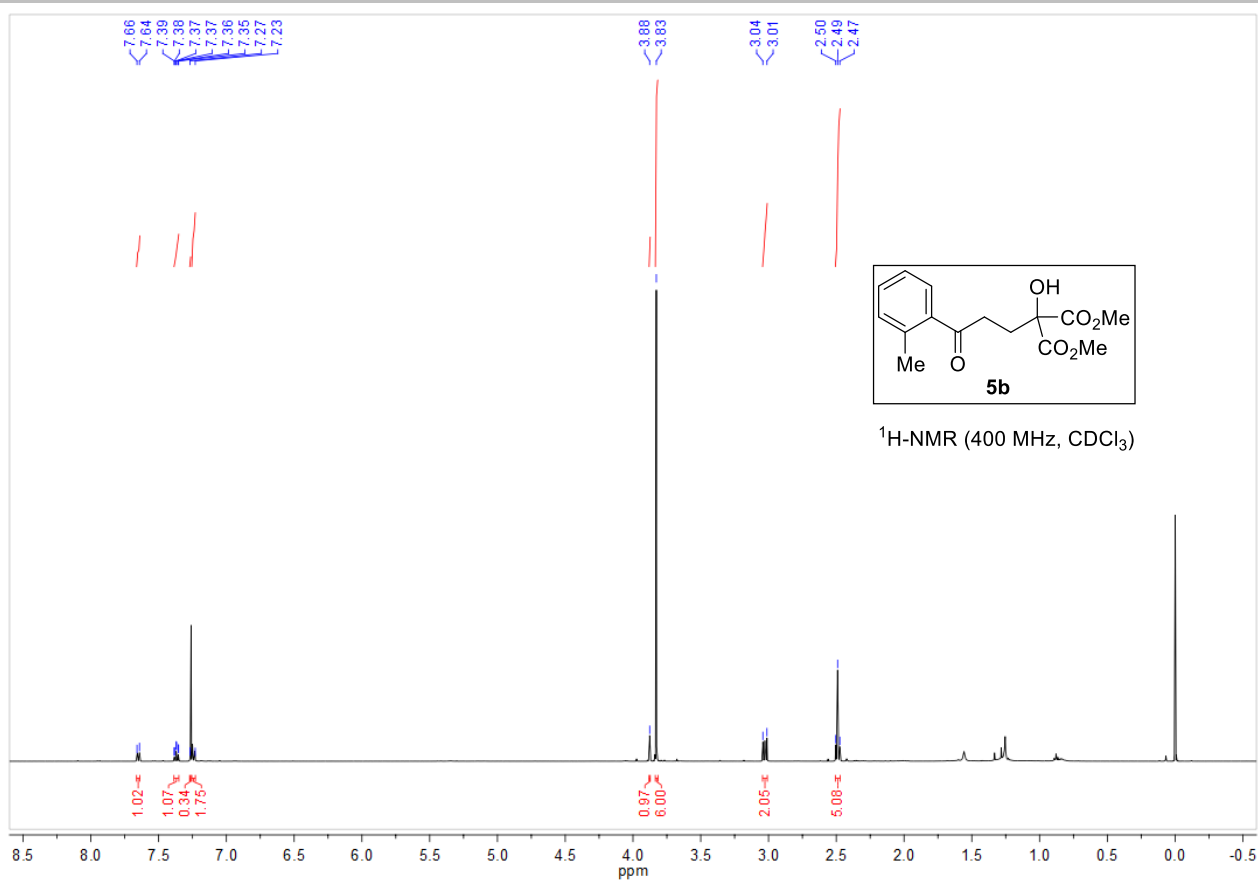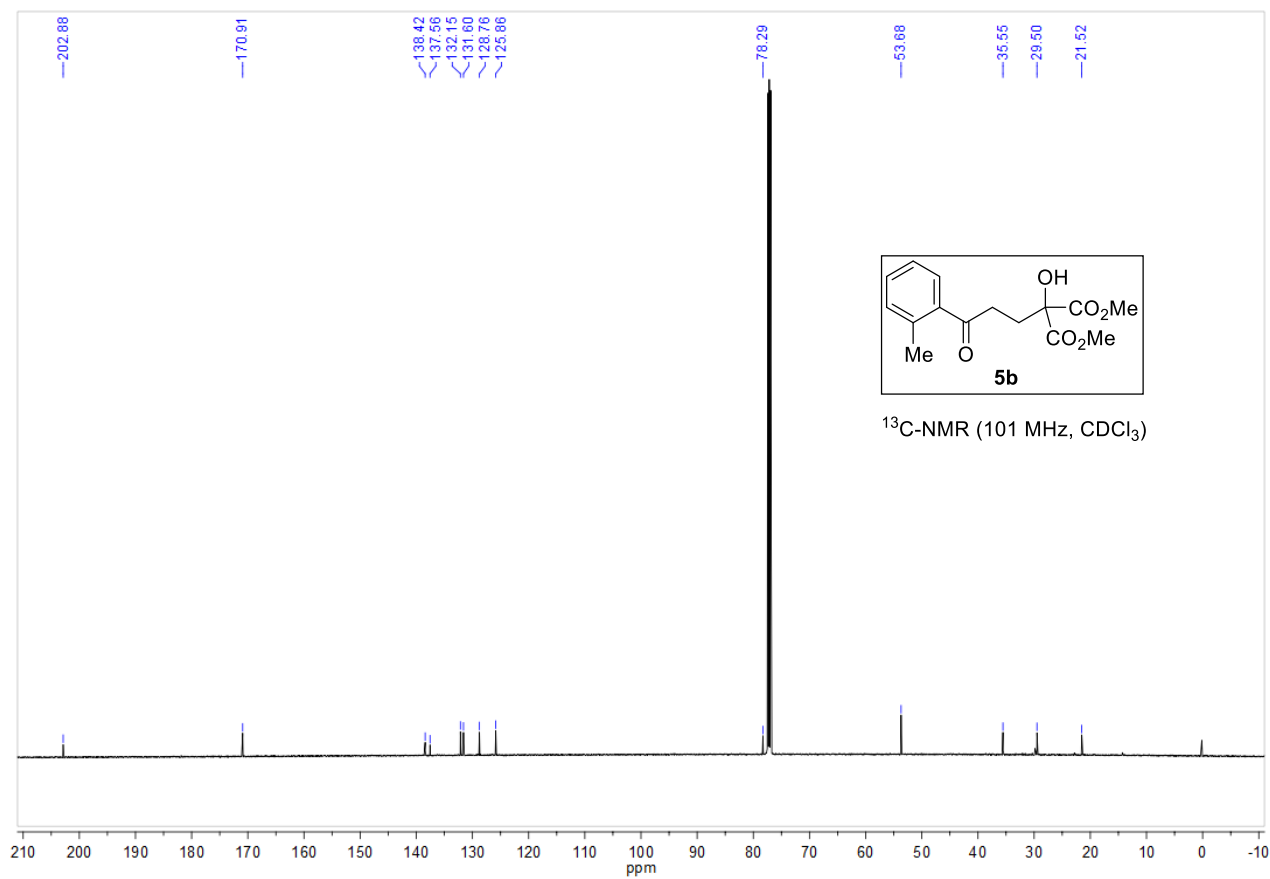

## SUPPORTING INFORMATION

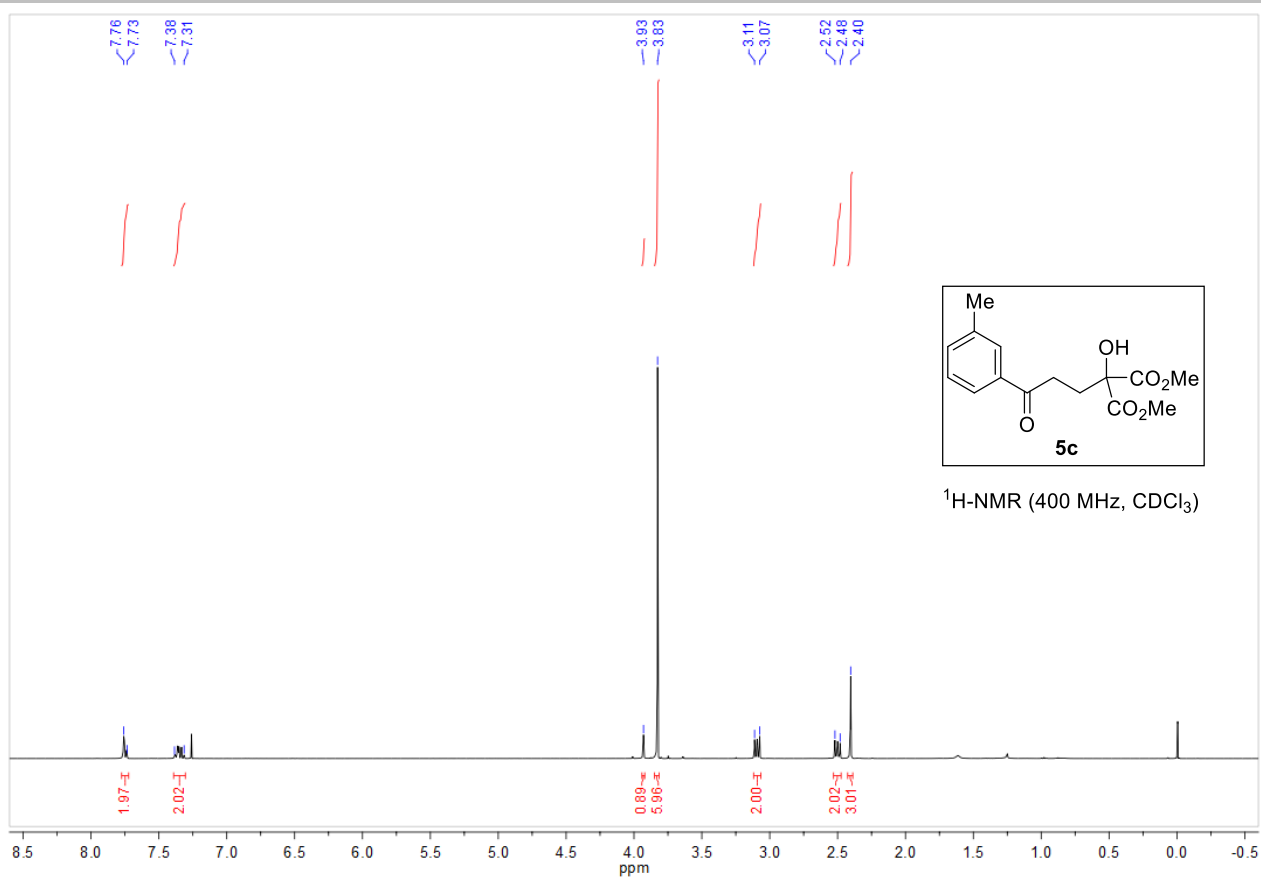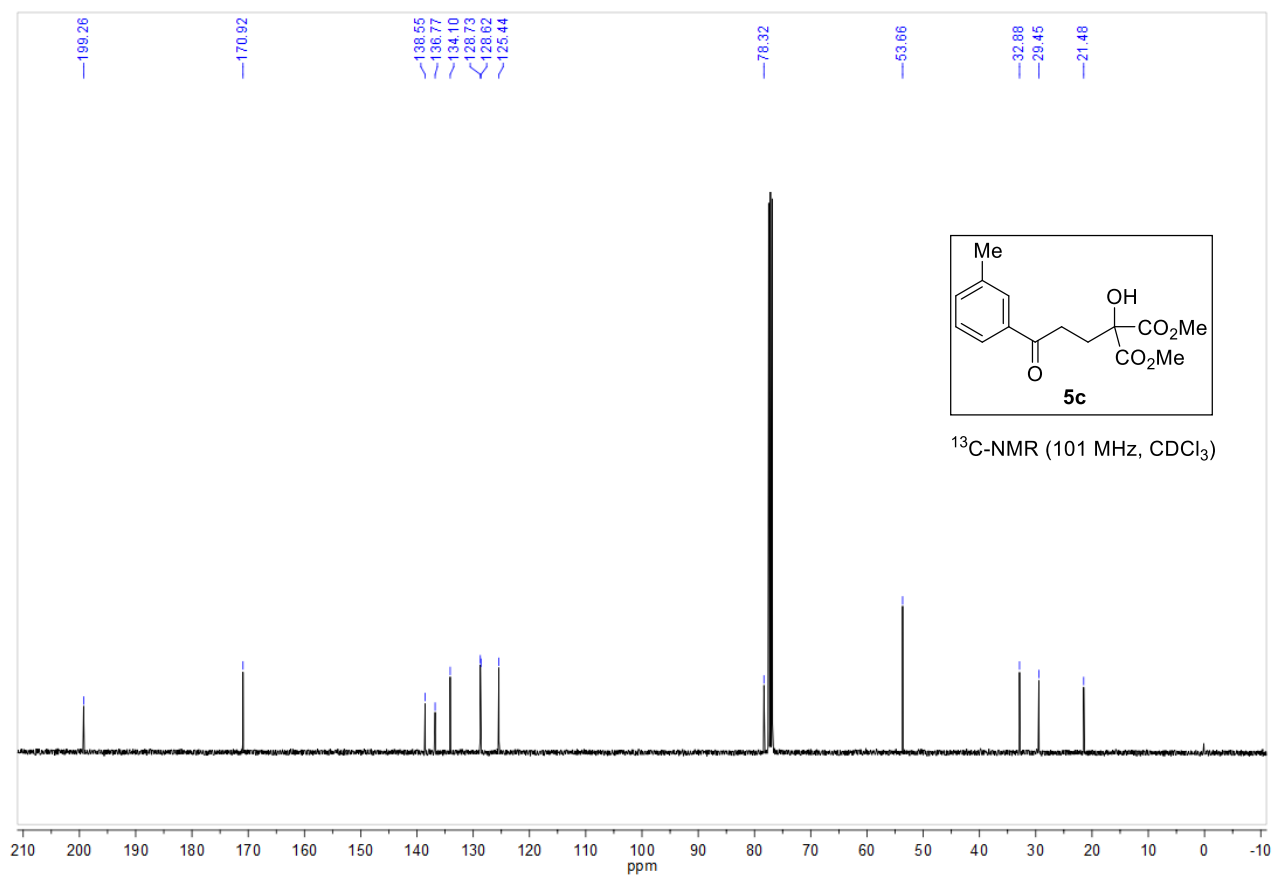

## SUPPORTING INFORMATION

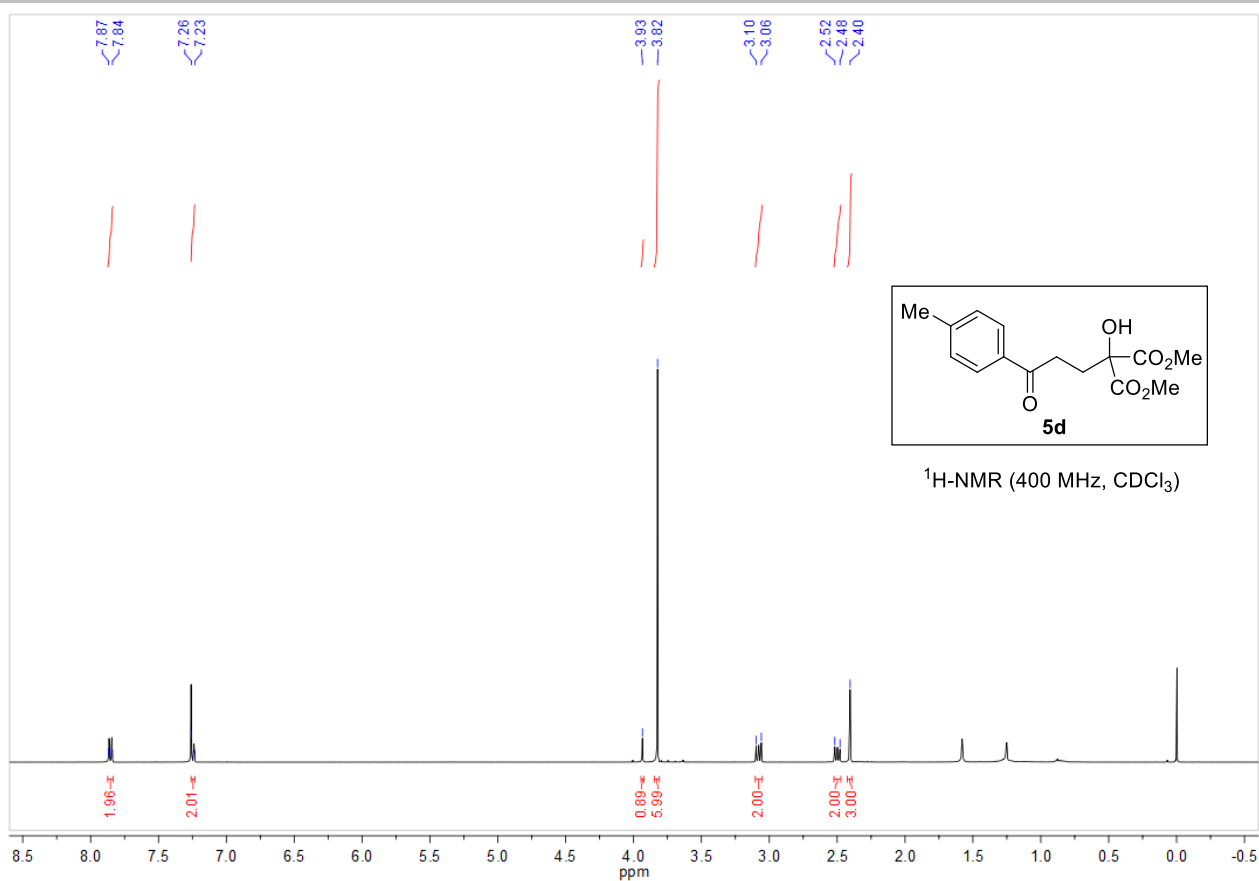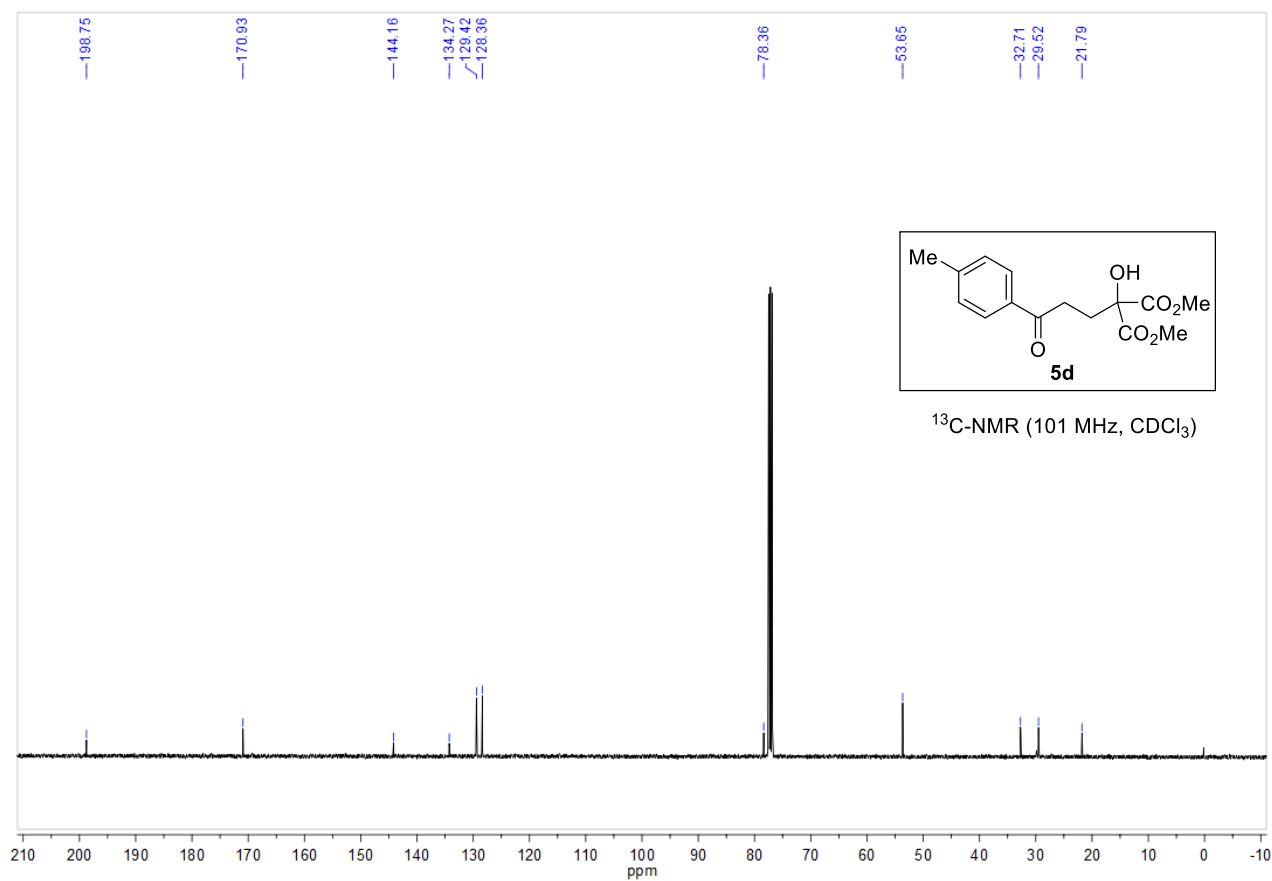



## SUPPORTING INFORMATION

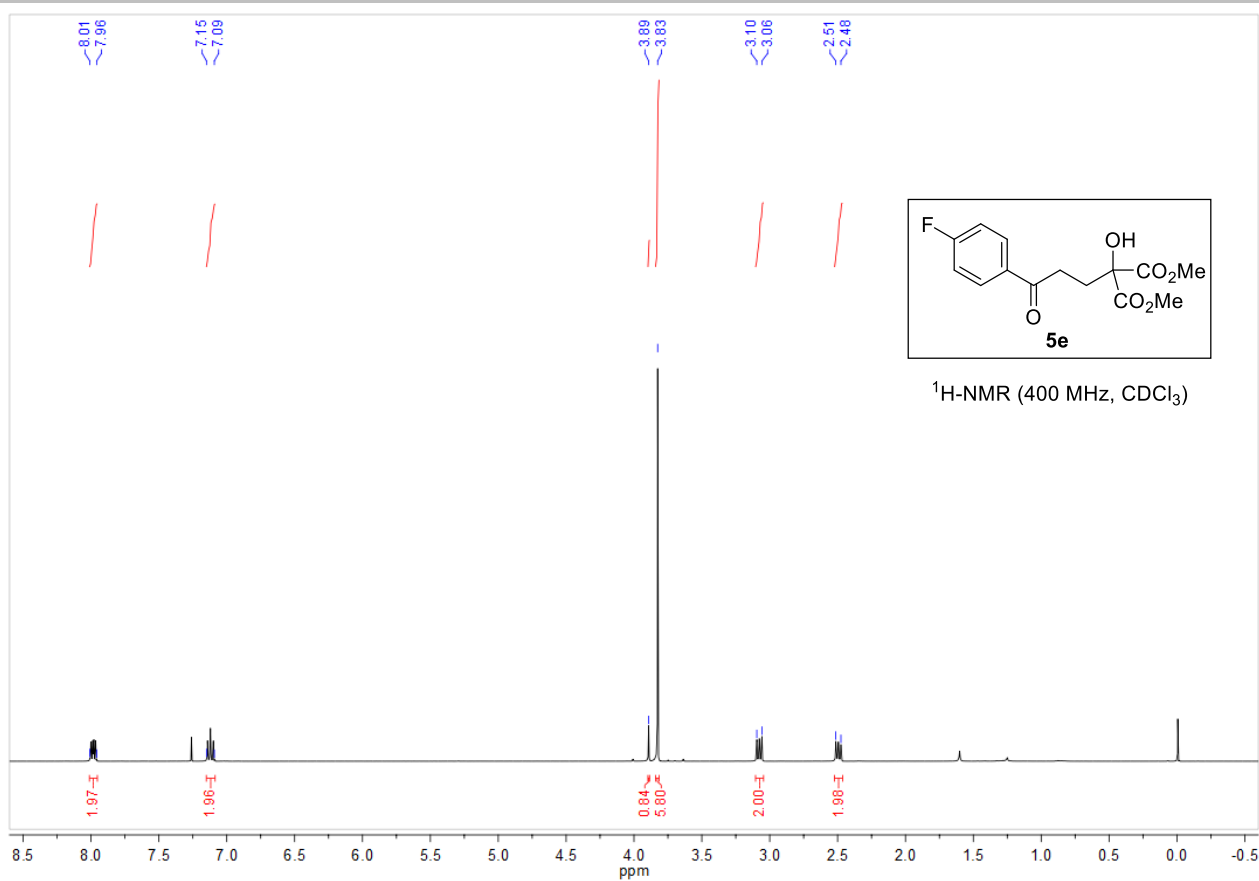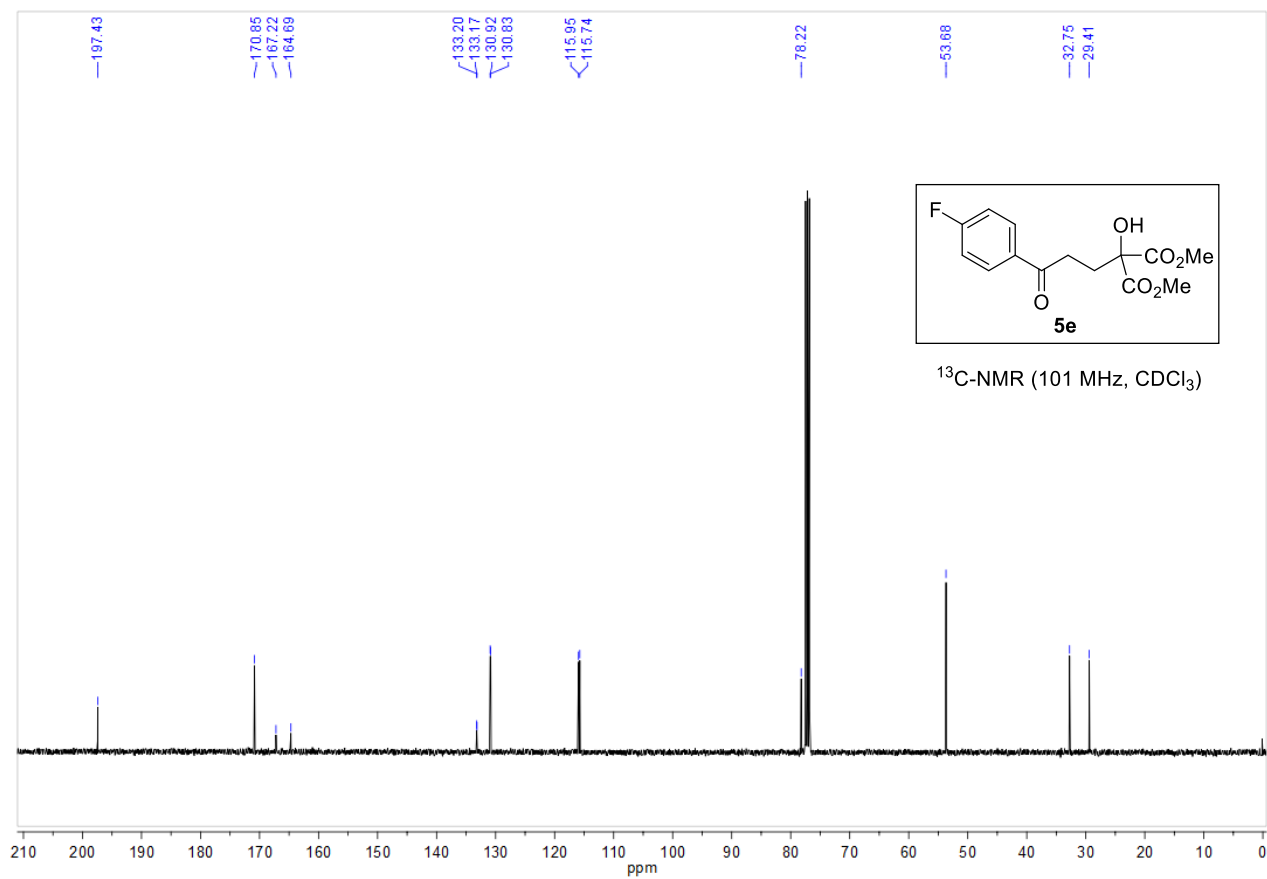

## SUPPORTING INFORMATION

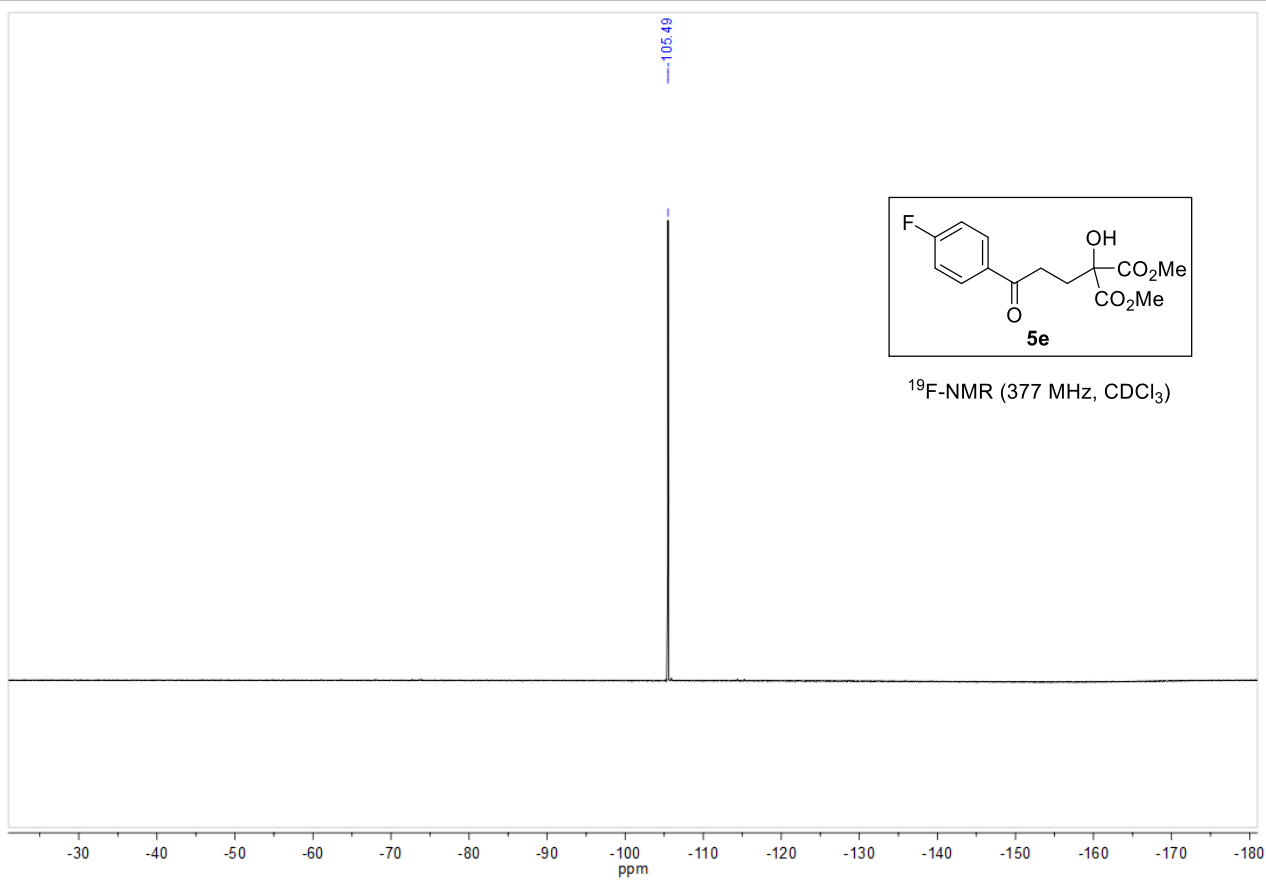

## SUPPORTING INFORMATION

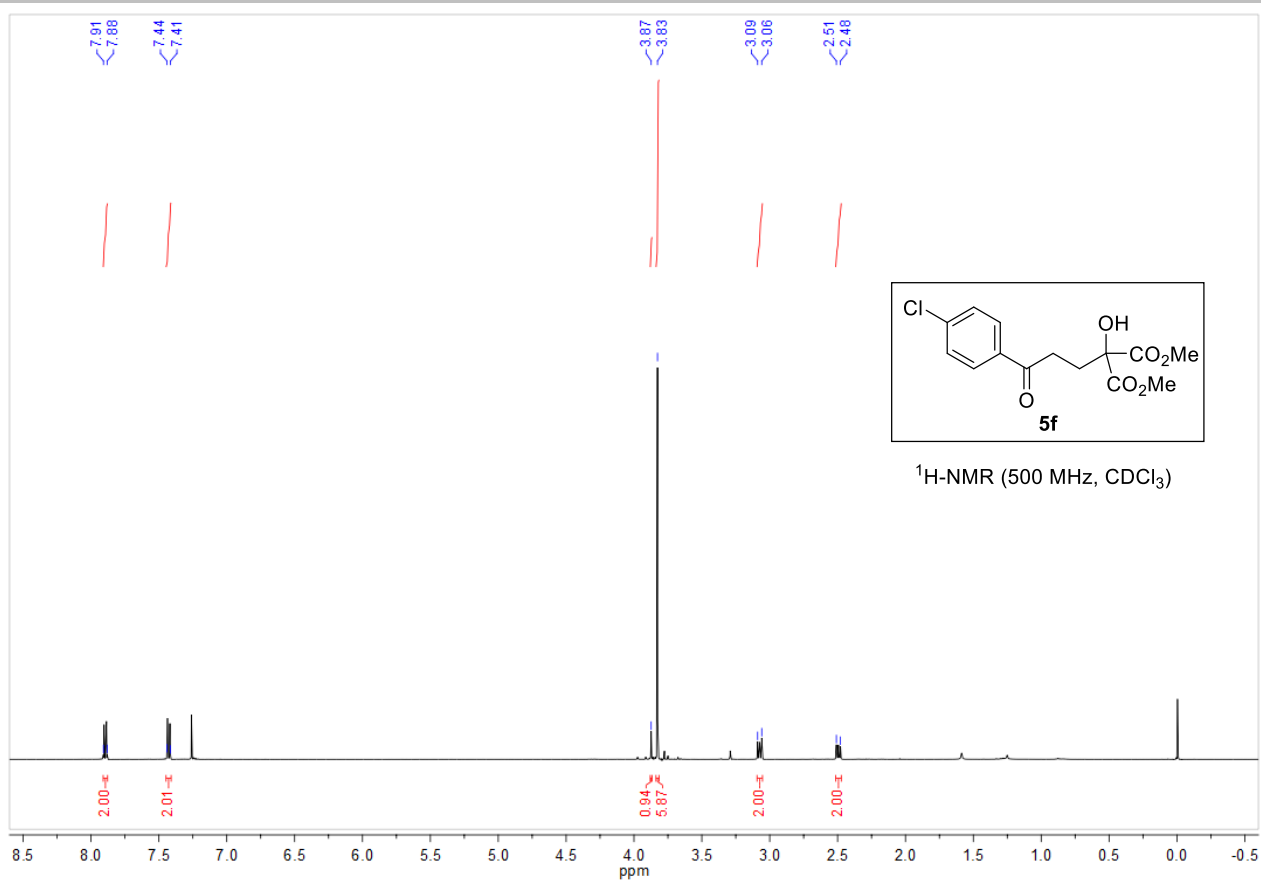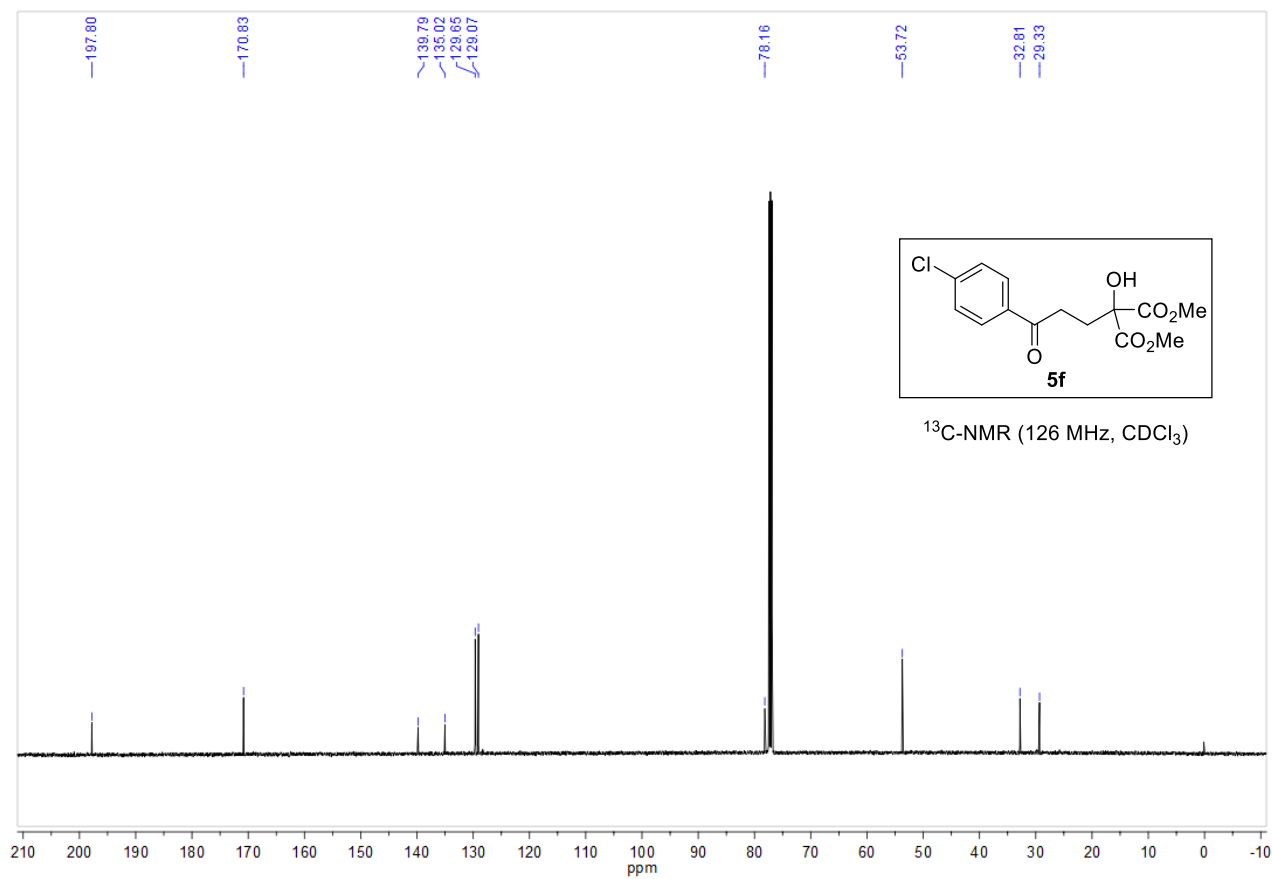

## SUPPORTING INFORMATION

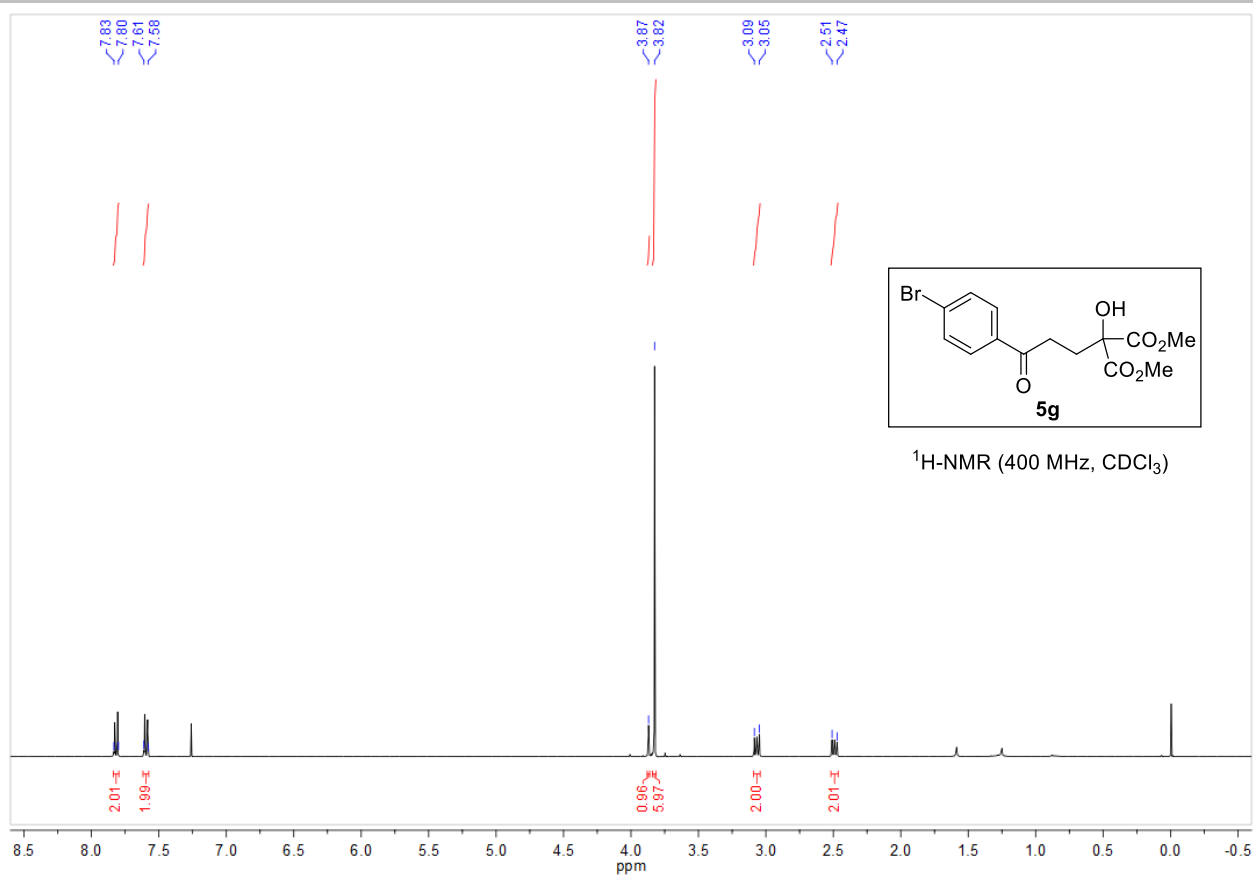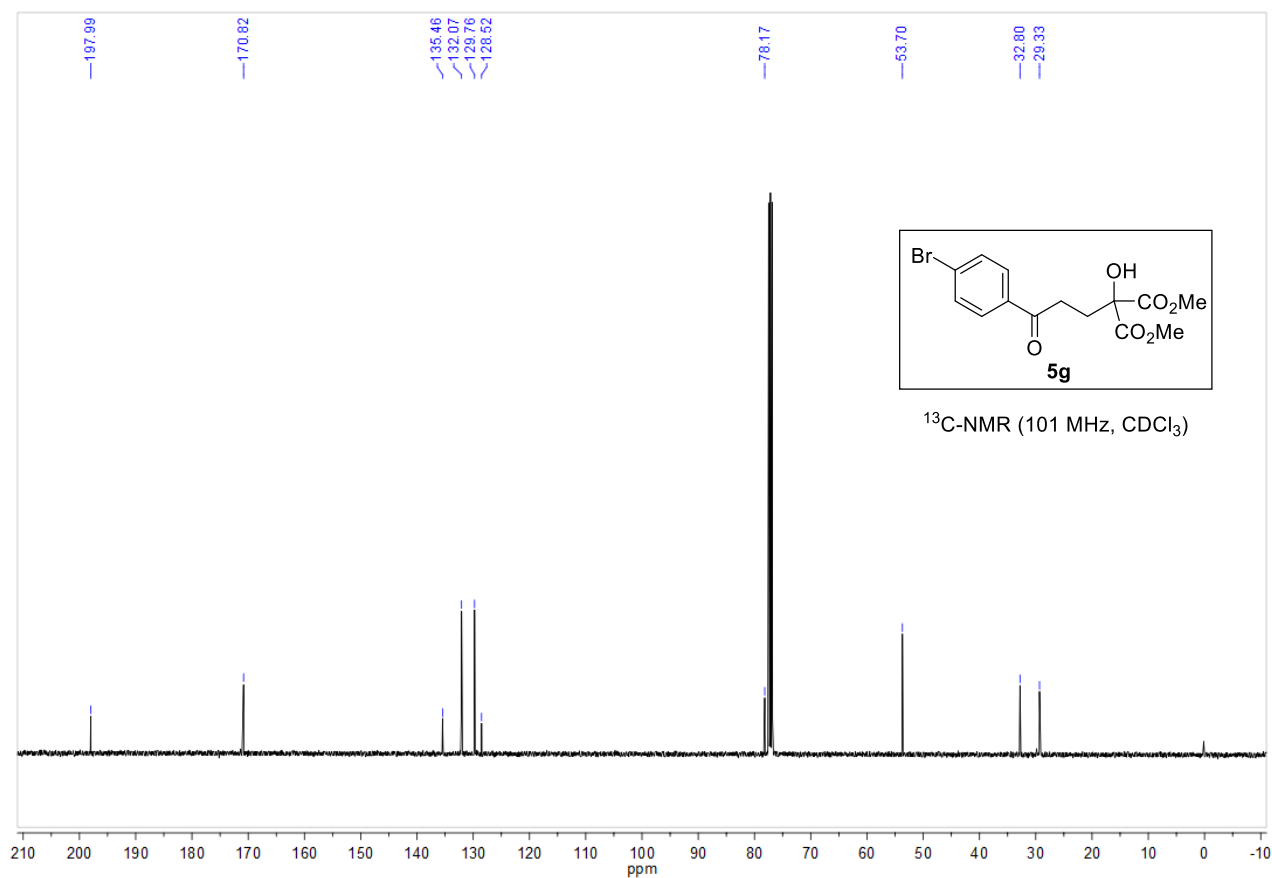

## SUPPORTING INFORMATION

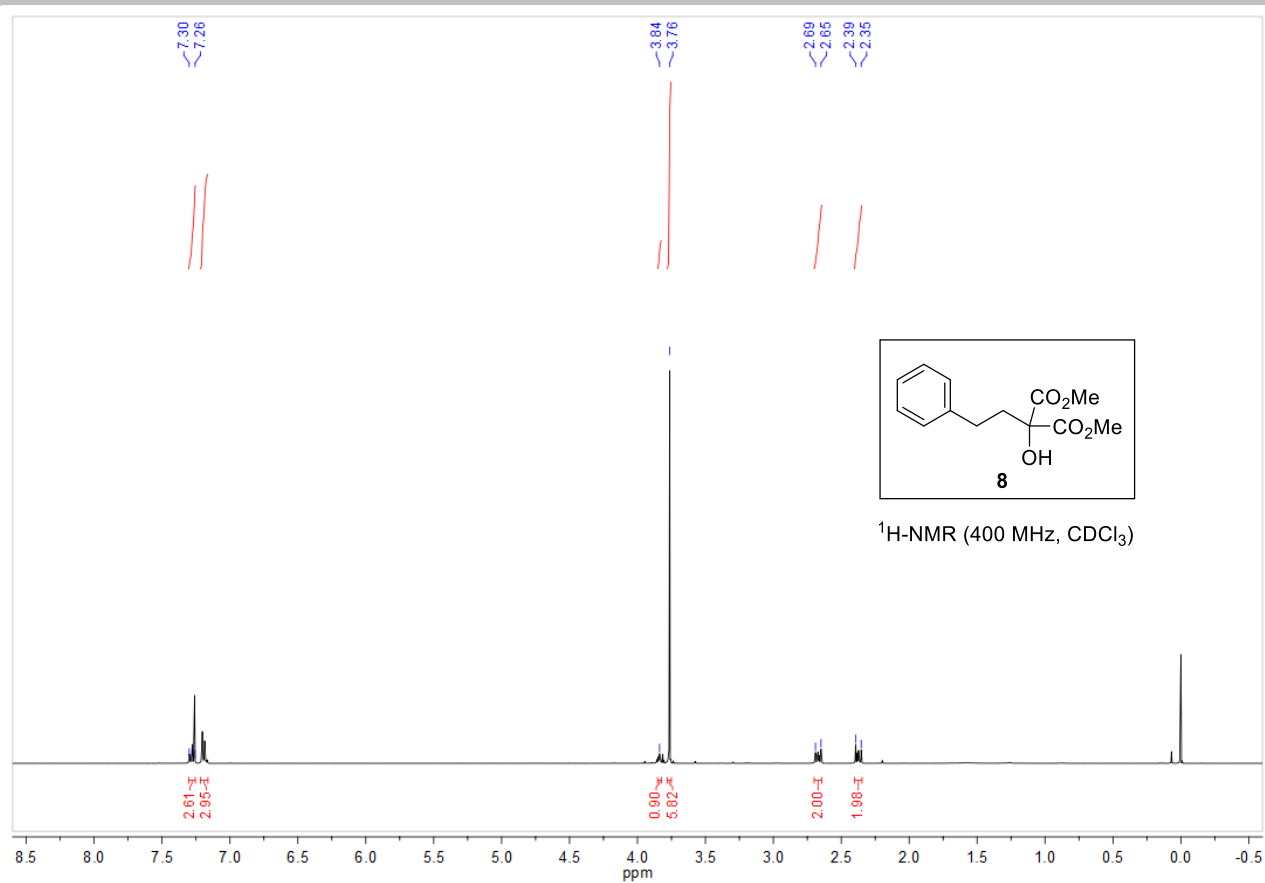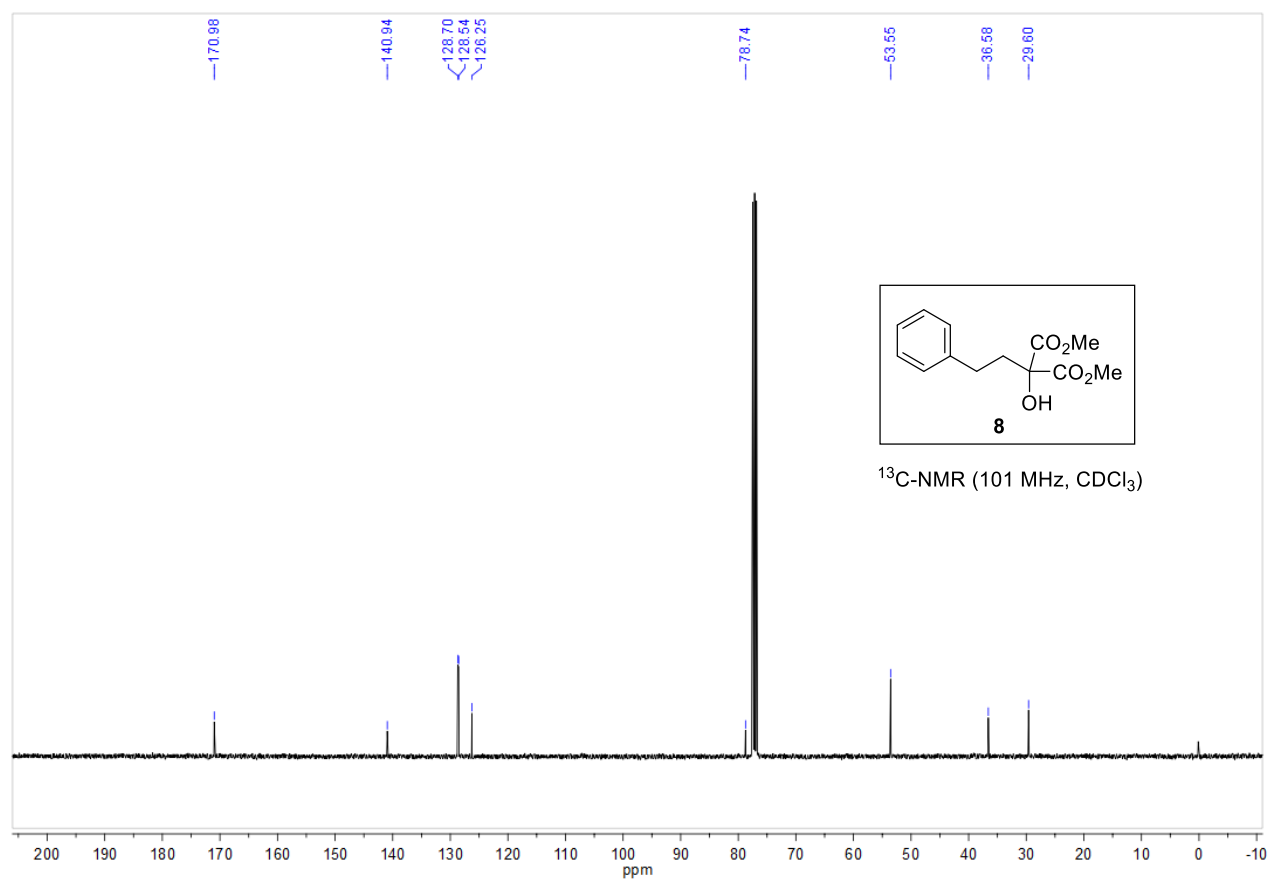

## SUPPORTING INFORMATION

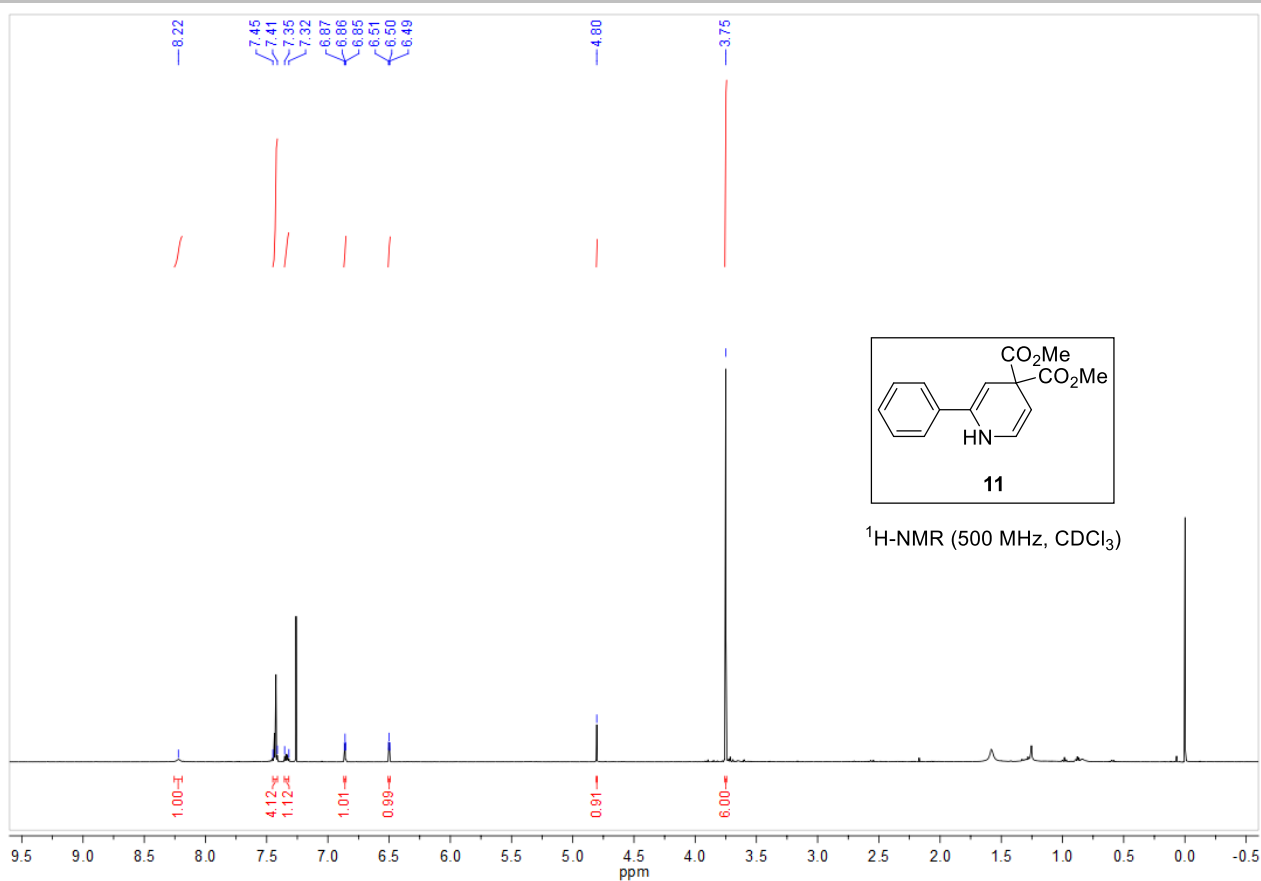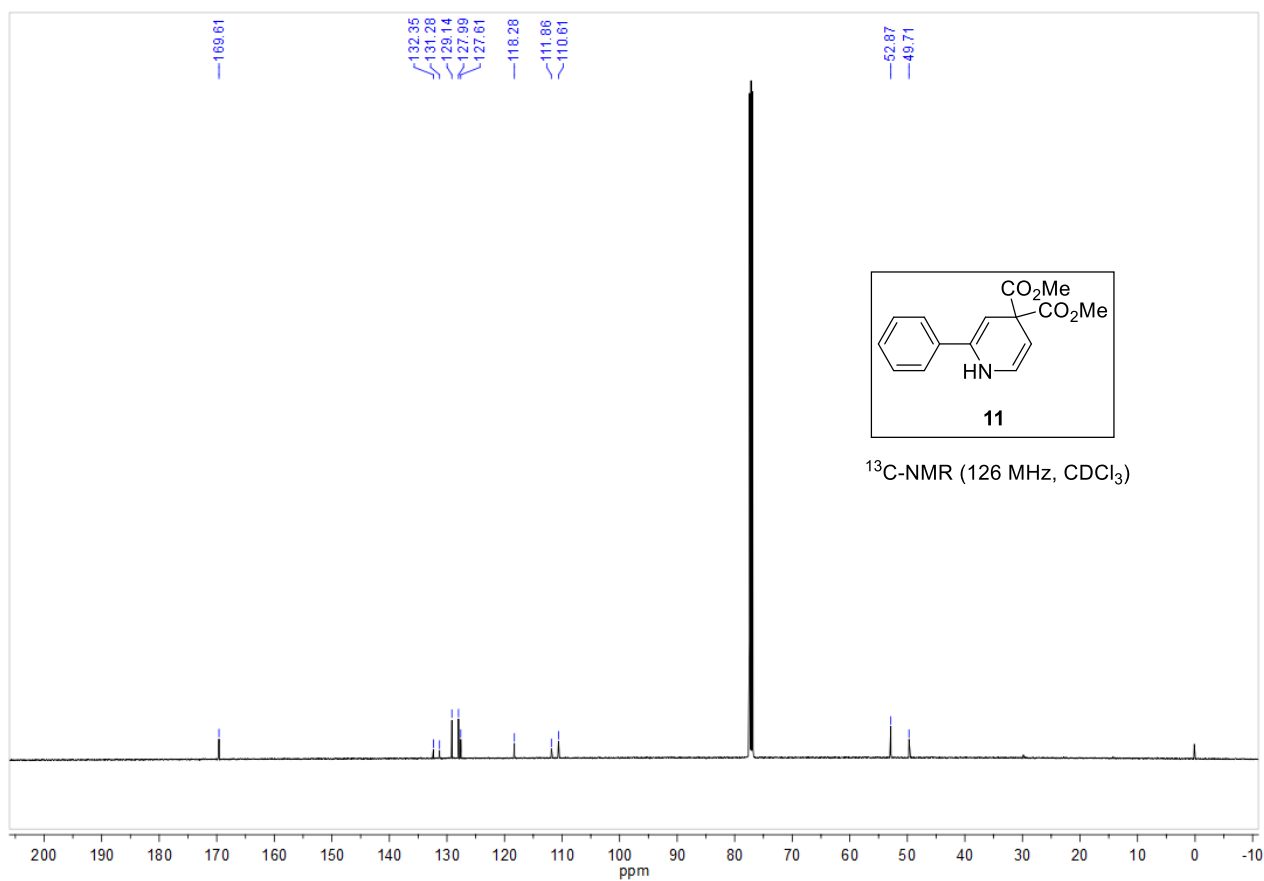

## SUPPORTING INFORMATION

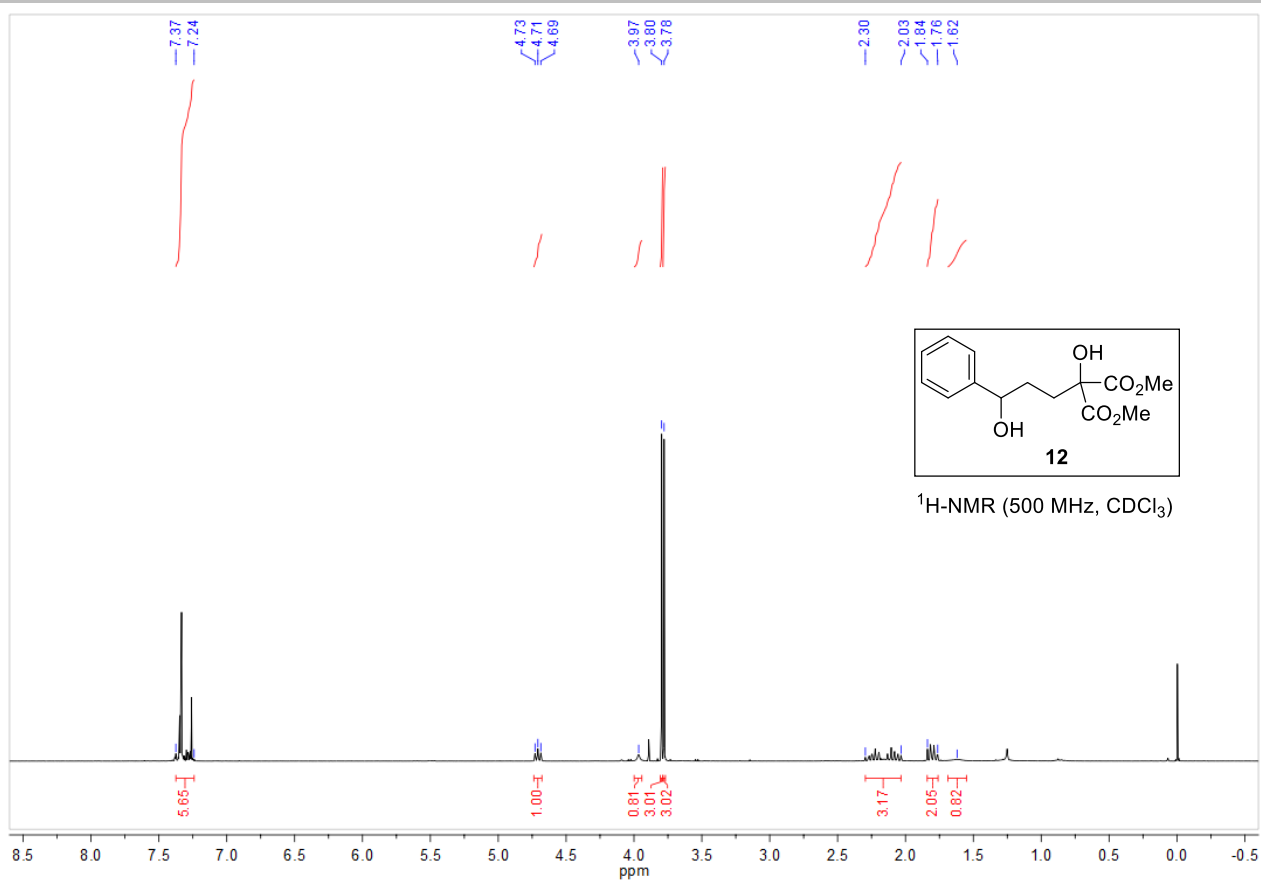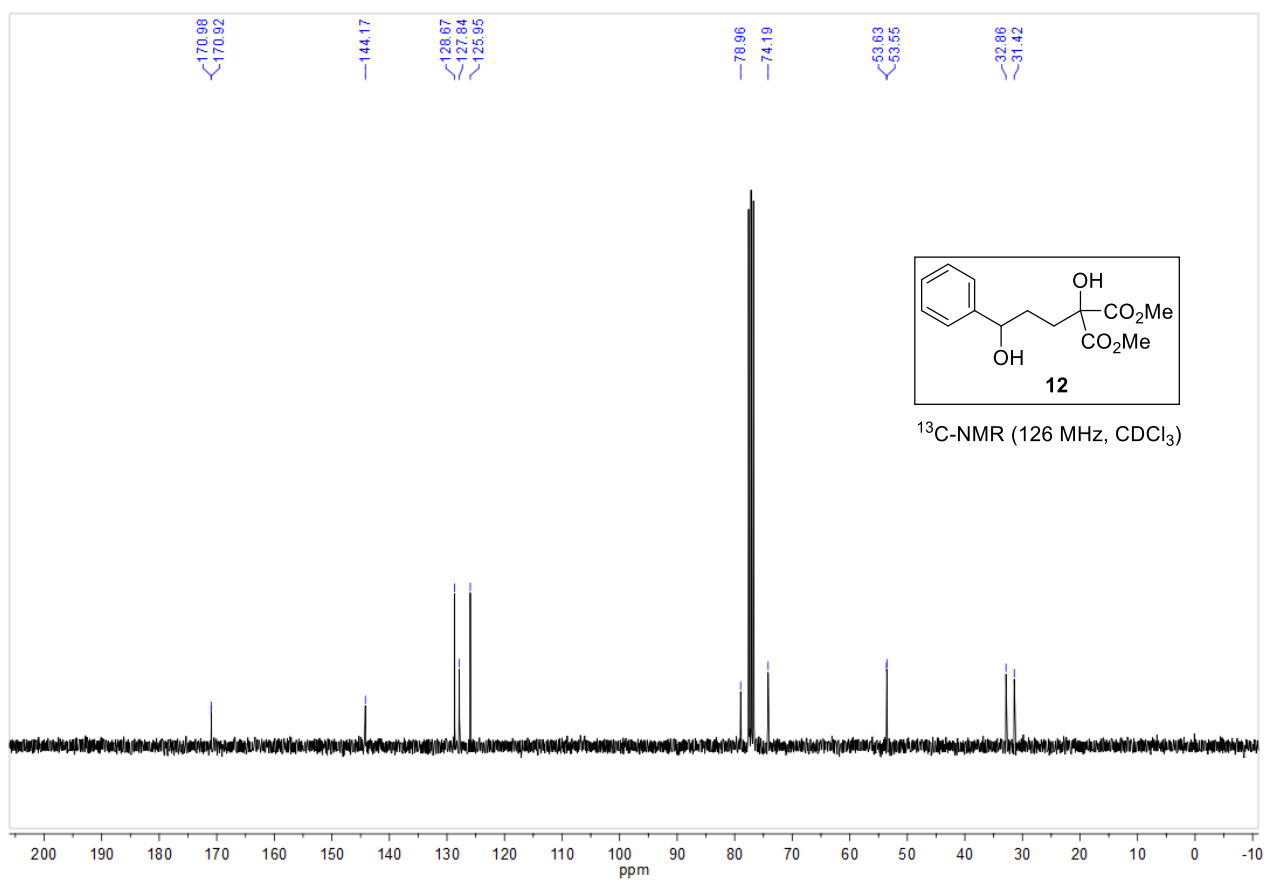

## SUPPORTING INFORMATION

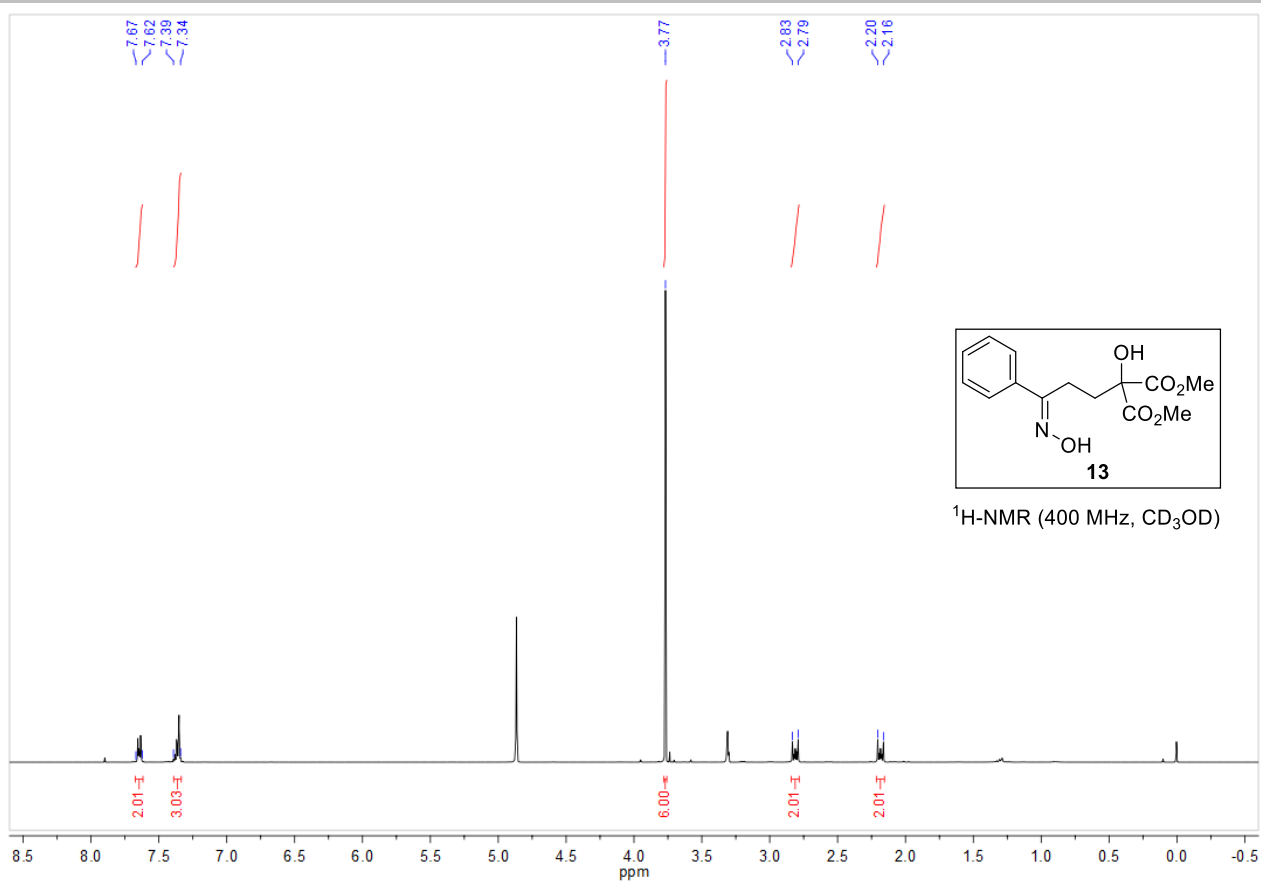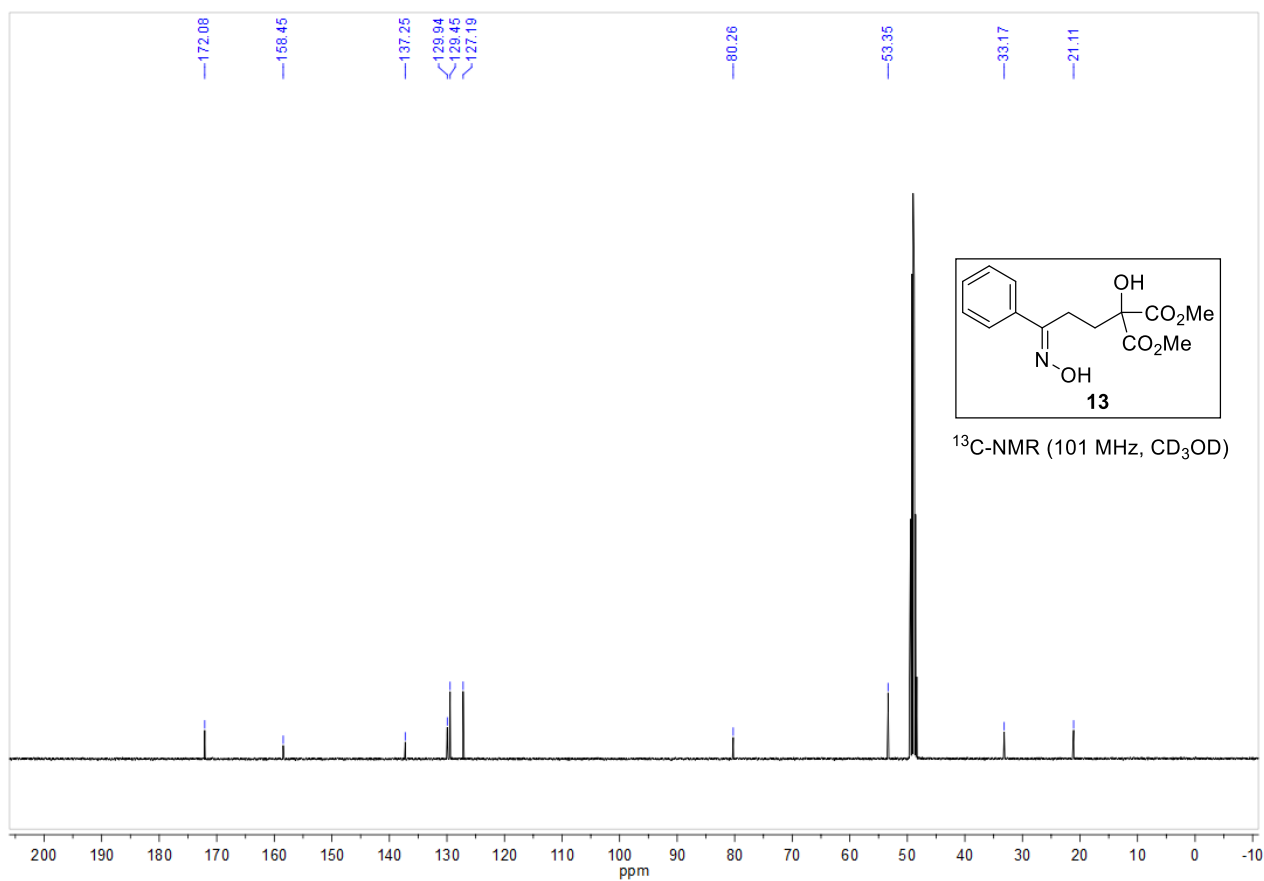



## SUPPORTING INFORMATION

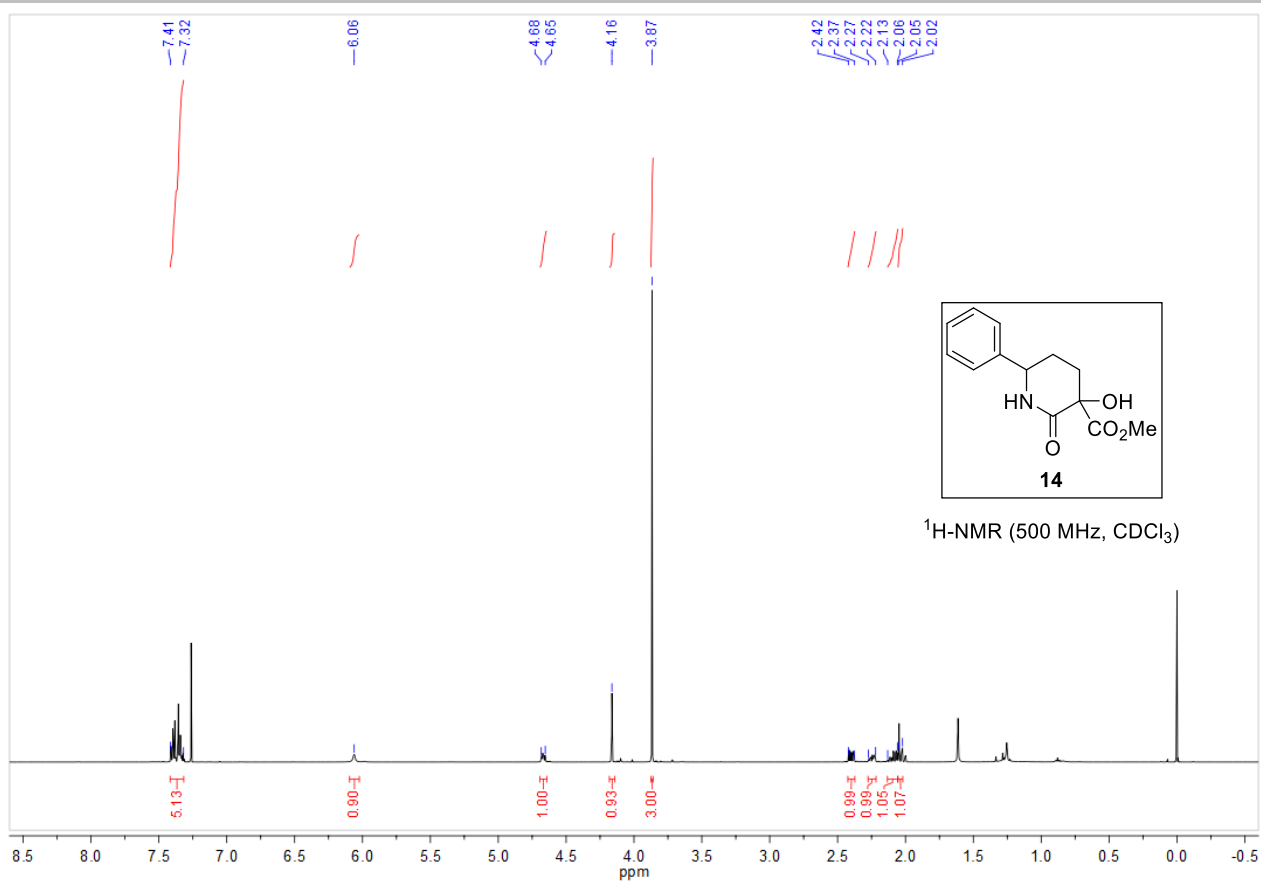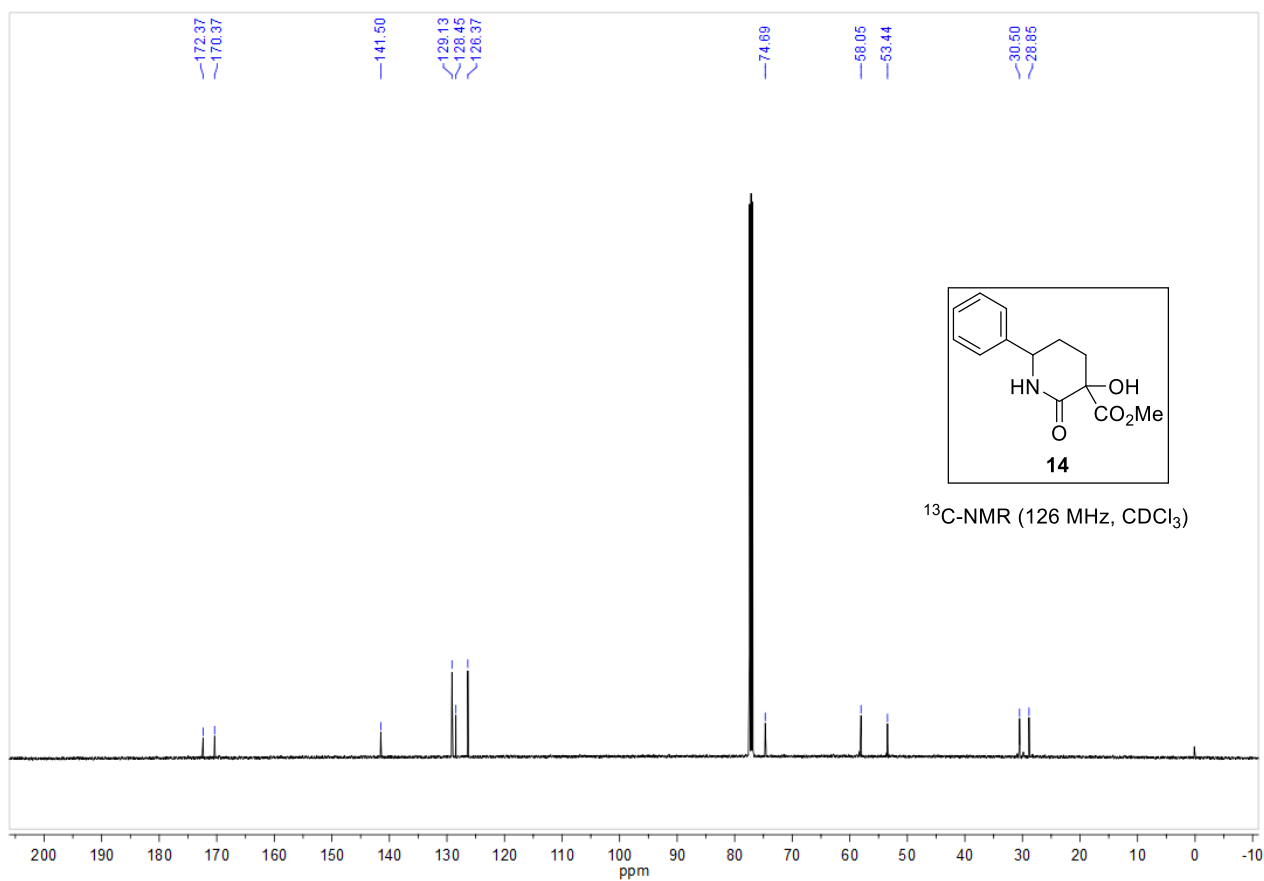

## SUPPORTING INFORMATION

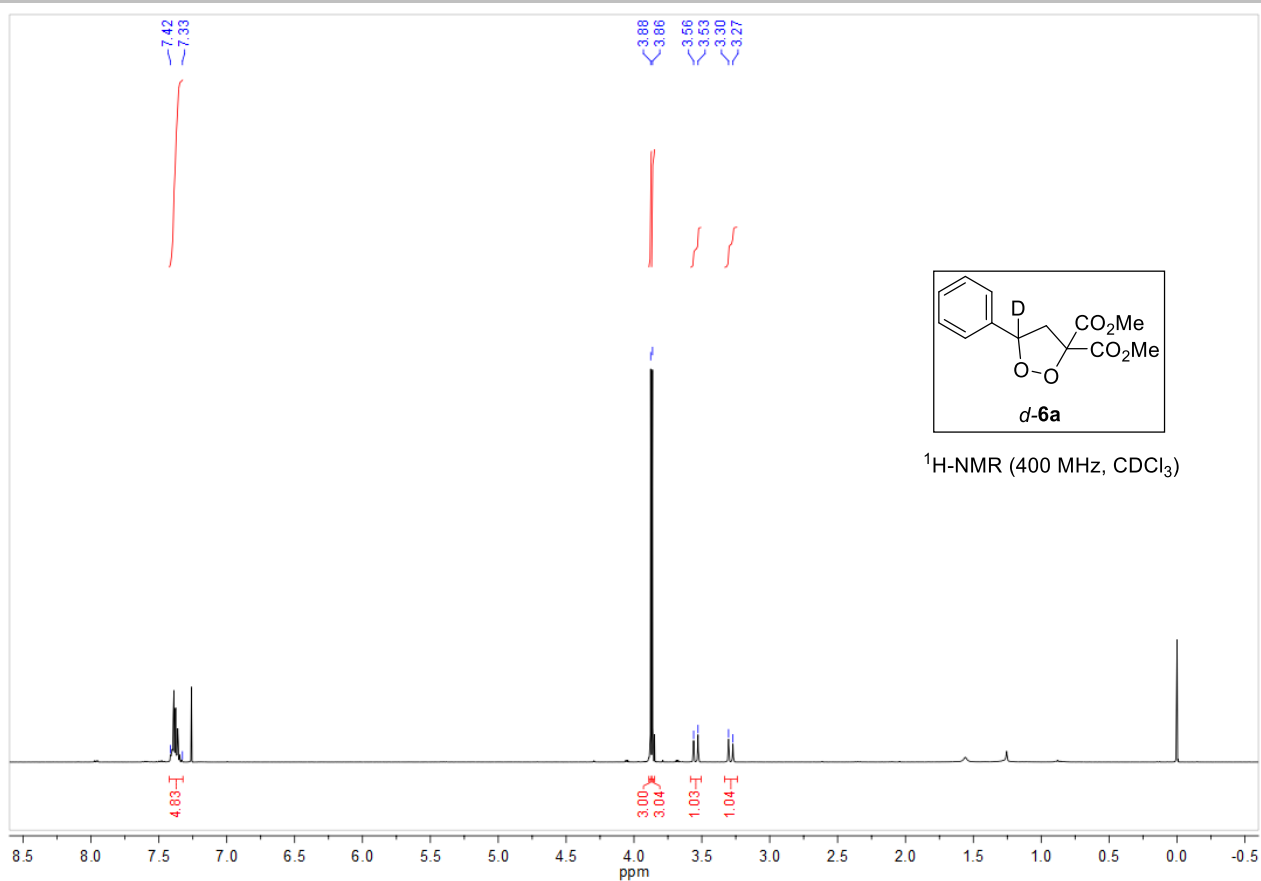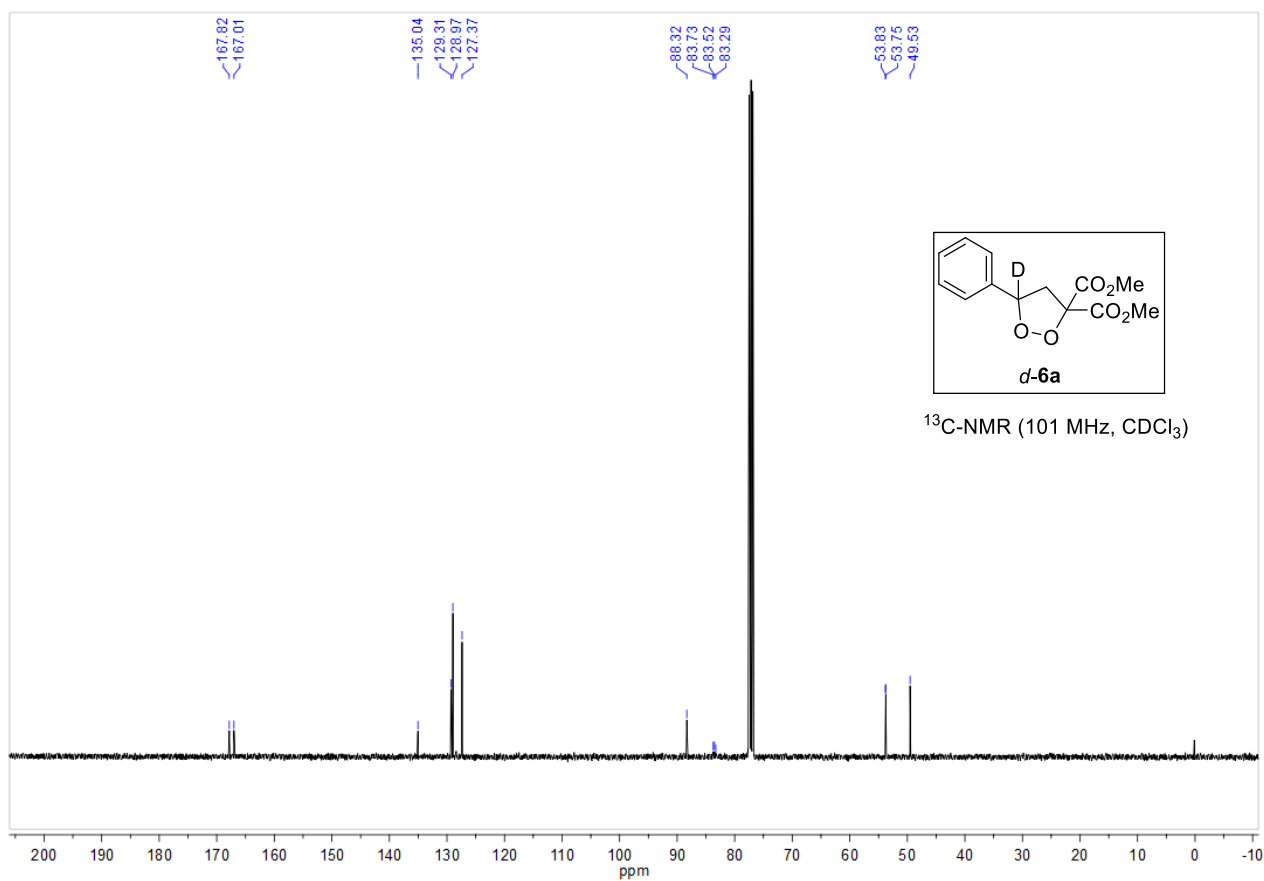

## SUPPORTING INFORMATION

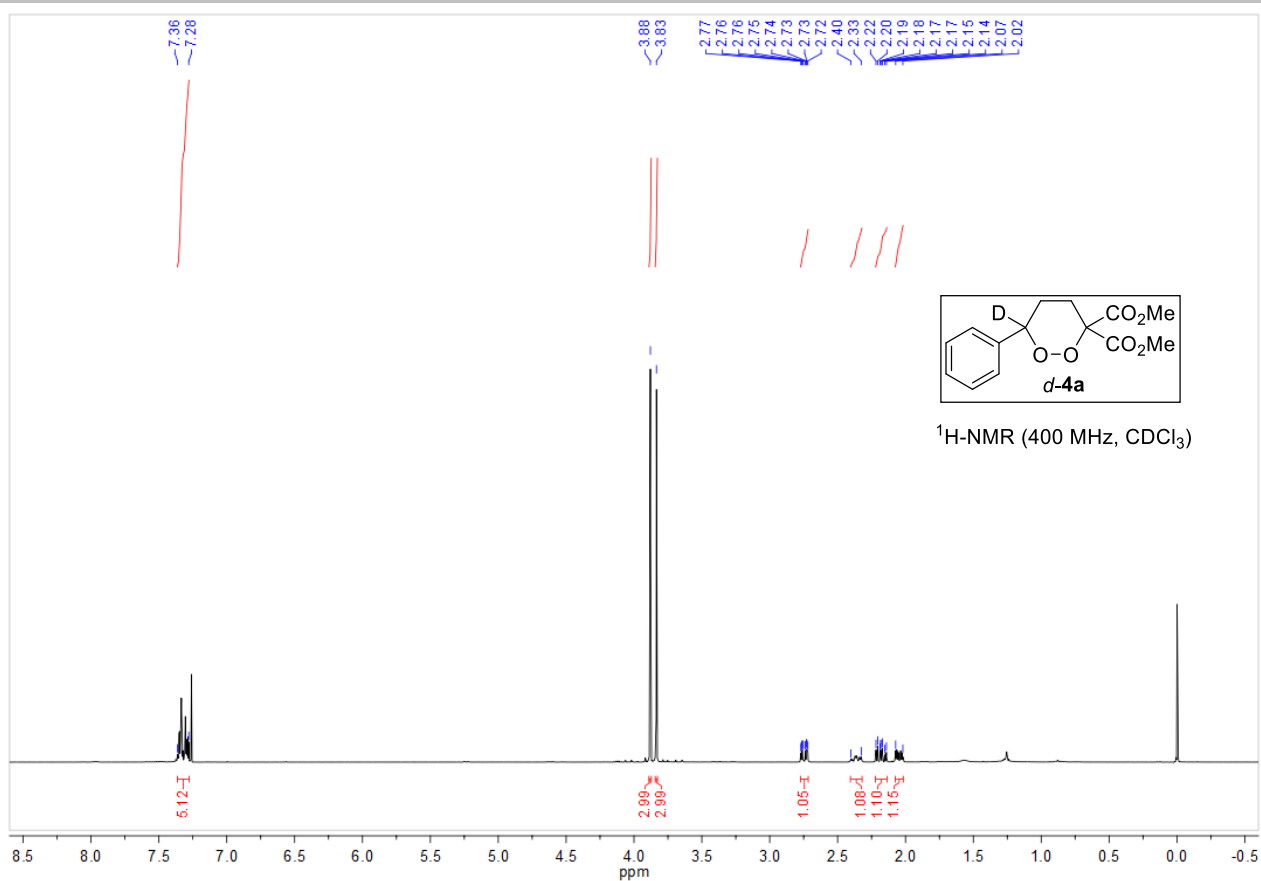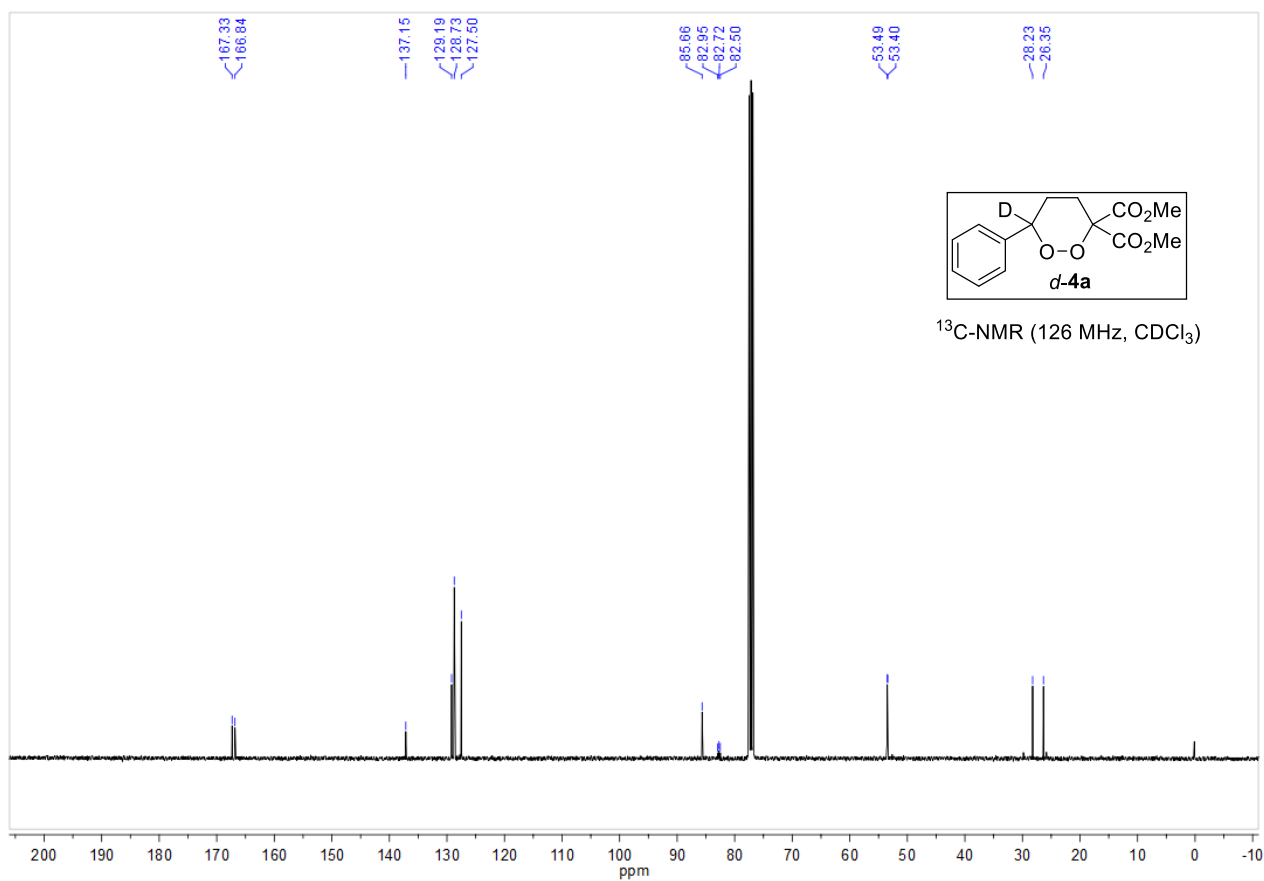

## SUPPORTING INFORMATION

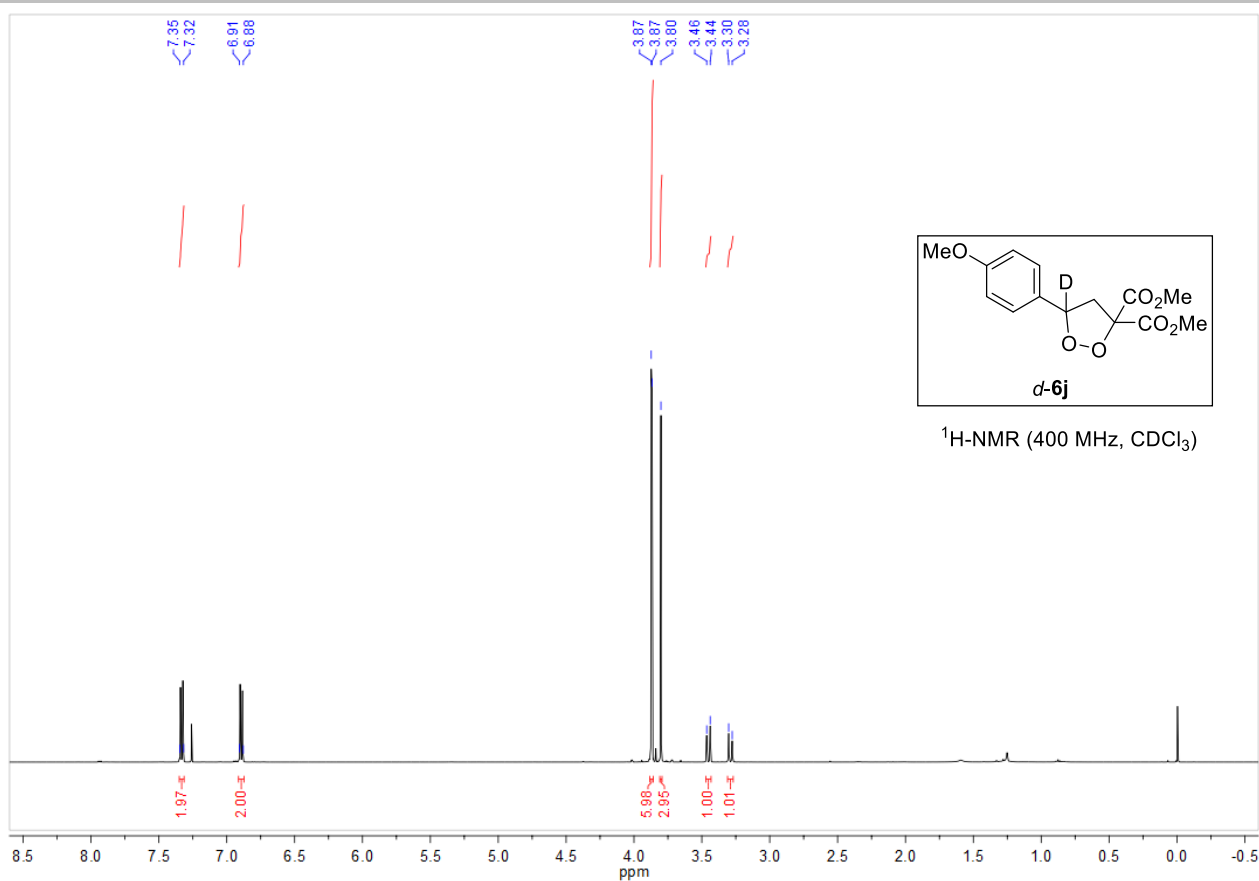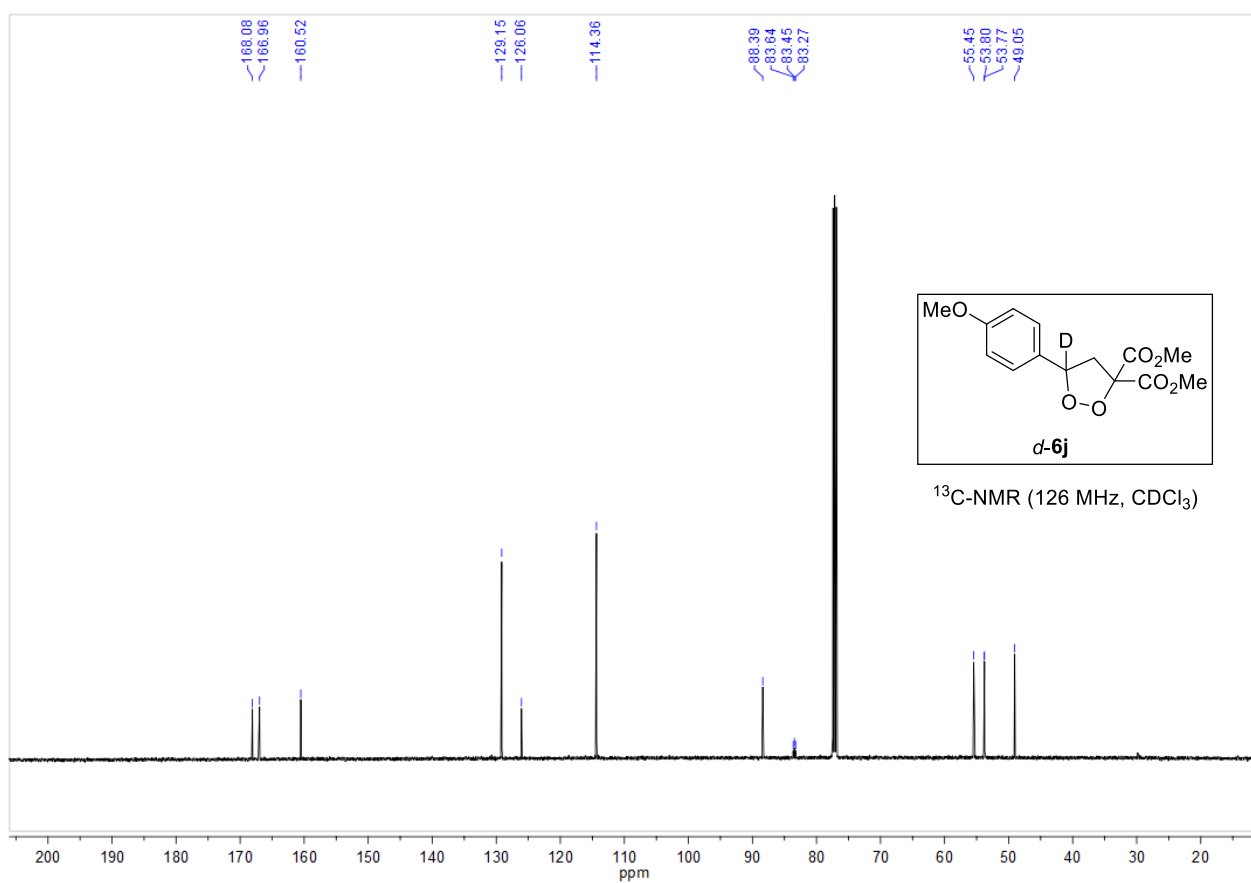

## SUPPORTING INFORMATION

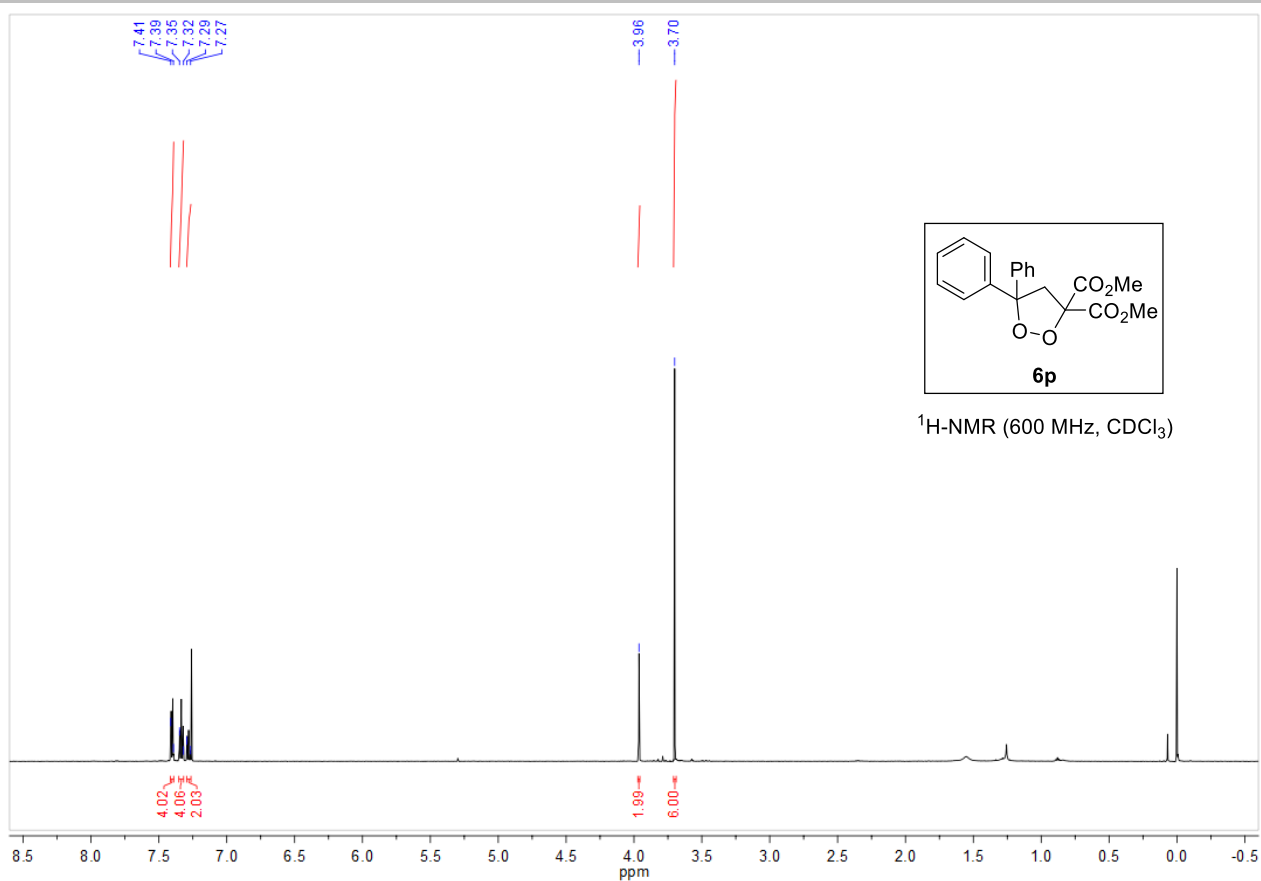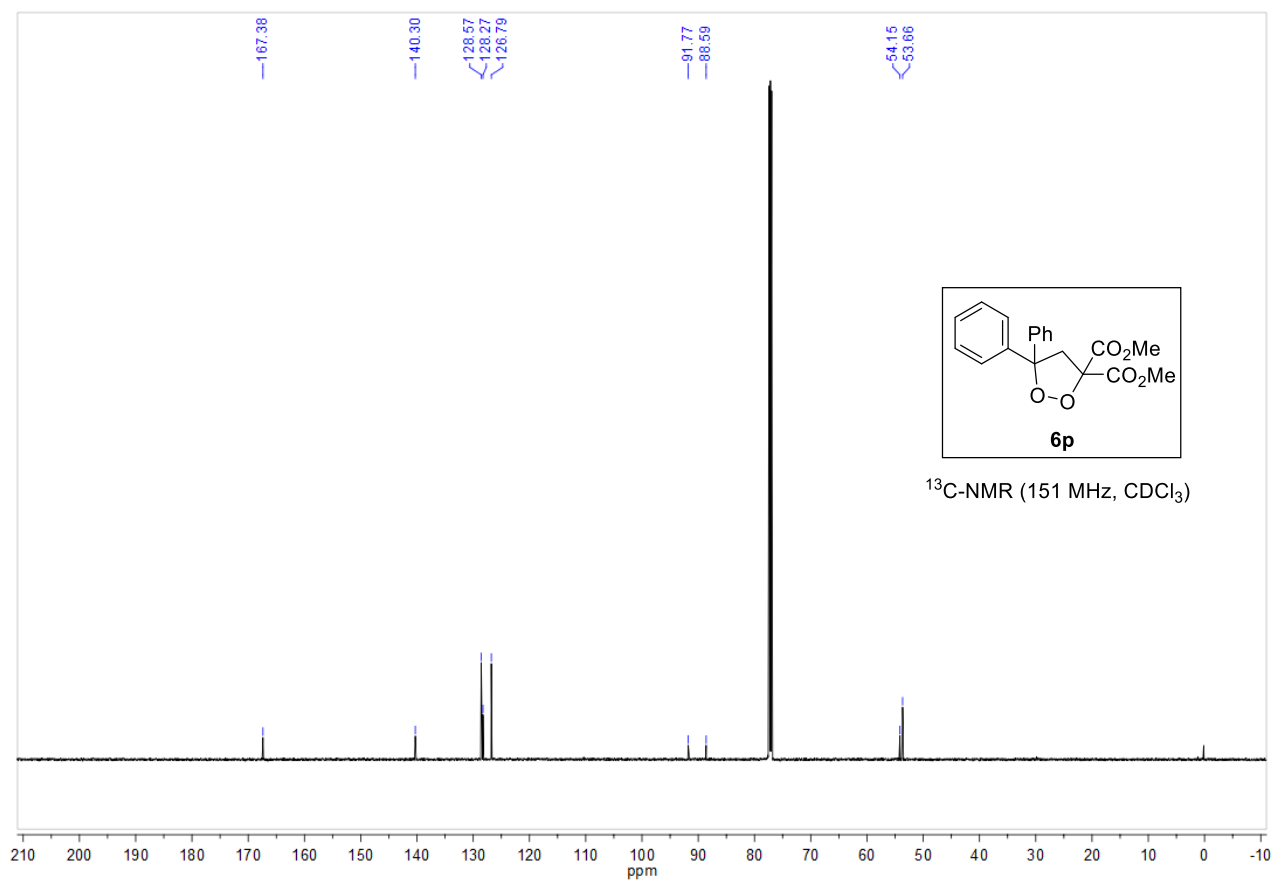

## SUPPORTING INFORMATION

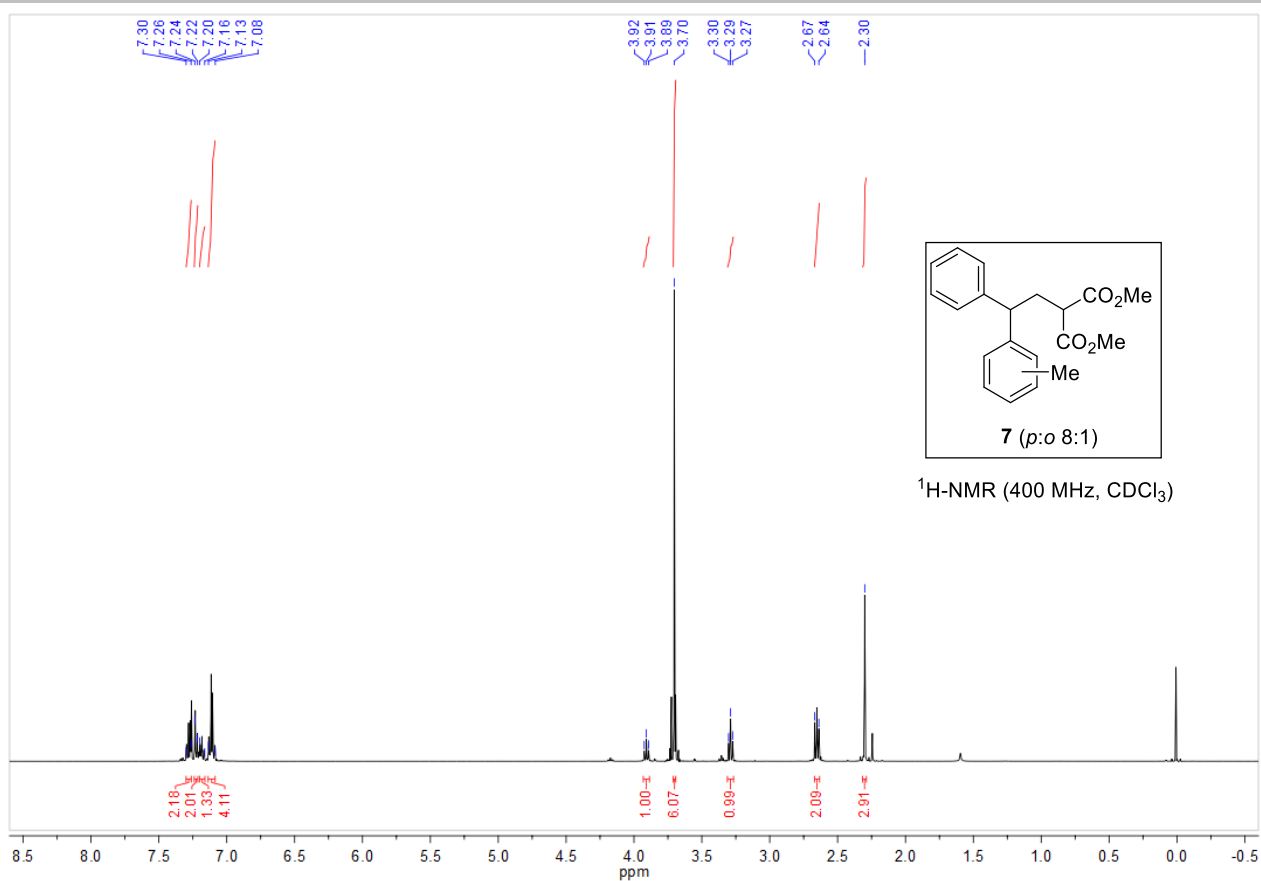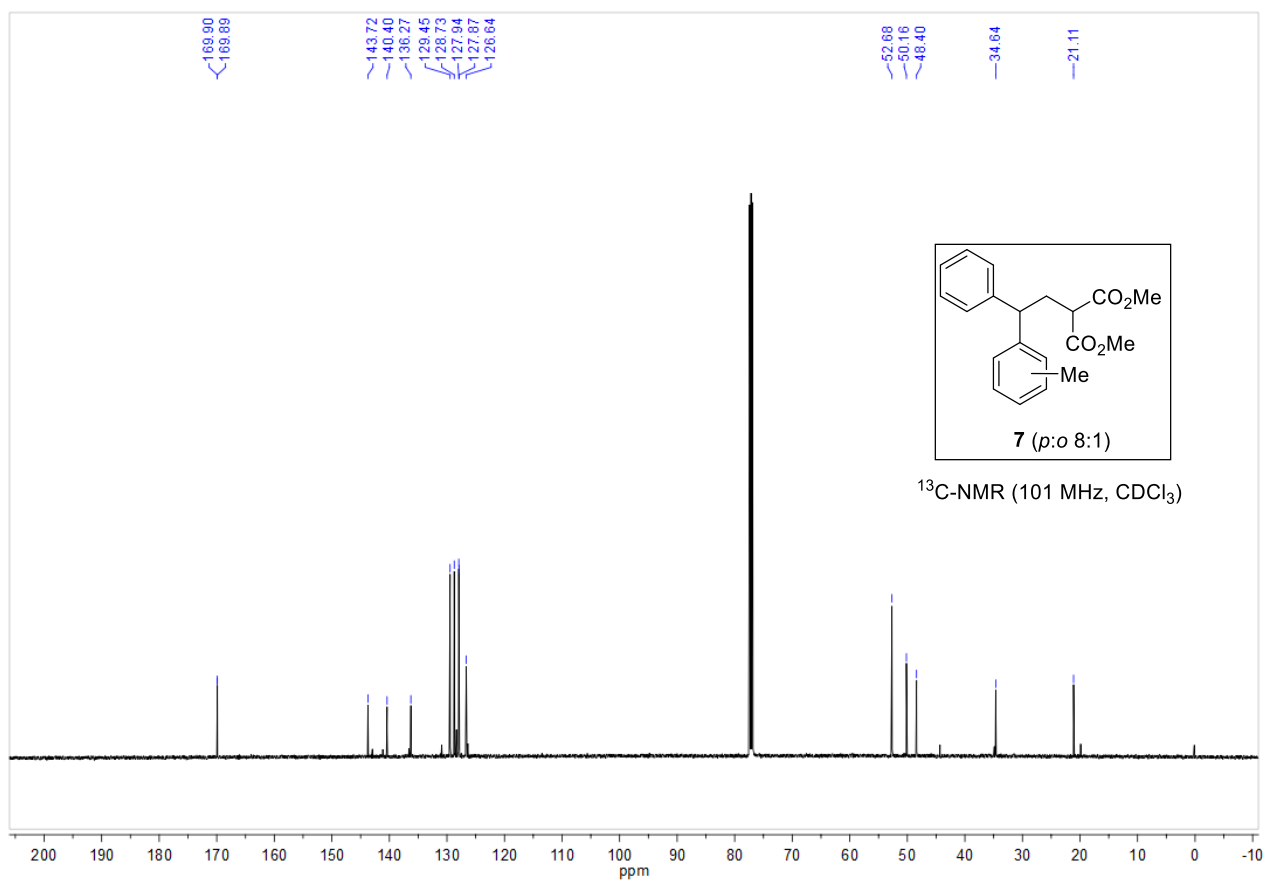

## 12. Crystal Structure Determinations

Crystals were mounted in inert oil on nylon loops and transferred to the cold gas stream of a Rigaku/Oxford XtaLAB Synergy diffractometer. Measurements were performed using mirror-focussed Mo-K $\alpha$  radiation. Absorption corrections were implemented on the basis of multi-scans. The structures were refined anisotropically on  $F^2$  using the program SHELXL-2018.<sup>[27]</sup> Hydrogen atoms of NH or OH groups were refined freely. Other hydrogen atoms were included using rigid methyl groups or a riding model starting from calculated positions. *Special features for compound 9:* The structure was refined as a pseudomerohedral twin. The twinning is associated with a twofold rotation of a pseudo-C-centred orthorhombic cell. The twin matrix is  $[-1\ 0\ 0 / 0\ -1\ 0 / 1\ 0\ 1]$  and the fraction of the smaller twin component refined to 0.0164(5). Despite this small value, the refinement was significantly improved. The compound is achiral and crystallizes only by chance in a chiral (Sohncke) space group. The absolute structure was established with reasonable certainty by the Parsons method, with a Flack parameter of  $-0.01(19)$ , despite the limited extent of anomalous scattering for a light-atom structure.

Crystallographic data are summarized in Table S4. Additionally, complete data have been deposited with the Cambridge Crystallographic Data Centre under the numbers CCDC 2058833–2058836. Copies of the data can be obtained free of charge from [www.ccdc.cam.ac.uk/data\\_request/cif](http://www.ccdc.cam.ac.uk/data_request/cif).

## SUPPORTING INFORMATION

**Table S4.** Crystallographic data and structure refinement details for compounds **2a**, **4f**, **5a**, and **9**.

| Compound                                       | <b>2a</b>                                      | <b>4f</b>                                        | <b>5a</b>                                      | <b>9</b>                                                      |
|------------------------------------------------|------------------------------------------------|--------------------------------------------------|------------------------------------------------|---------------------------------------------------------------|
| CCDC number                                    | 2058833                                        | 2058834                                          | 2058835                                        | 2058836                                                       |
| Formula                                        | C <sub>13</sub> H <sub>14</sub> O <sub>6</sub> | C <sub>14</sub> H <sub>15</sub> ClO <sub>6</sub> | C <sub>14</sub> H <sub>16</sub> O <sub>6</sub> | C <sub>13</sub> H <sub>12</sub> N <sub>2</sub> O <sub>3</sub> |
| <i>M<sub>r</sub></i>                           | 266.24                                         | 314.71                                           | 280.27                                         | 244.25                                                        |
| Cryst. size (mm)                               | 0.25 x 0.25 x 0.2                              | 0.2 x 0.2 x 0.1                                  | 0.25 x 0.2 x 0.15                              | 0.25 x 0.2 x 0.2                                              |
| Crystal system                                 | orthorhombic                                   | Triclinic                                        | monoclinic                                     | monoclinic                                                    |
| Space group                                    | <i>Pbca</i>                                    | <i>P</i> (-1)                                    | <i>P</i> 2 <sub>1</sub> / <i>c</i>             | <i>P</i> 2 <sub>1</sub>                                       |
| Temperature (°C)                               | -173                                           | -173                                             | -173                                           | -173                                                          |
| <i>a</i> (Å)                                   | 7.86328(17)                                    | 5.9522(2)                                        | 10.7792(2)                                     | 8.3598(3)                                                     |
| <i>b</i> (Å)                                   | 10.7192(2)                                     | 10.5680(4)                                       | 32.3527(7)                                     | 5.59576(14)                                                   |
| <i>c</i> (Å)                                   | 29.3301(6)                                     | 11.8459(6)                                       | 7.64904(16)                                    | 13.4683(4)                                                    |
| α (°)                                          | 90                                             | 74.745(3)                                        | 90                                             | 90                                                            |
| β (°)                                          | 90                                             | 78.003(3)                                        | 92.689(2)                                      | 108.000(3)                                                    |
| γ (°)                                          | 90                                             | 88.810(3)                                        | 90                                             | 90                                                            |
| <i>V</i> (Å <sup>3</sup> )                     | 2472.2                                         | 702.73                                           | 2664.6                                         | 599.20                                                        |
| <i>Z</i>                                       | 8                                              | 2                                                | 8                                              | 2                                                             |
| <i>D<sub>x</sub></i> (Mg m <sup>-3</sup> )     | 1.431                                          | 1.487                                            | 1.397                                          | 1.354                                                         |
| λ (Å)                                          | 0.71073                                        | 0.71073                                          | 0.71073                                        | 0.71073                                                       |
| μ (mm <sup>-1</sup> )                          | 0.11                                           | 0.30                                             | 0.11                                           | 0.10                                                          |
| Transmissions                                  | 0.843 – 1.000                                  | 0.791 – 1.000                                    | 0.855 – 1.000                                  | 0.837 – 1.000                                                 |
| <i>F</i> (000)                                 | 1120                                           | 328                                              | 1184                                           | 256                                                           |
| 2θ <sub>max</sub>                              | 71.8                                           | 68.4                                             | 68.3                                           | 72                                                            |
| Refl. measured                                 | 108765                                         | 45370                                            | 168597                                         | 47675                                                         |
| Refl. indep.                                   | 5553                                           | 5275                                             | 10296                                          | 5251                                                          |
| <i>R</i> <sub>int</sub>                        | 0.032                                          | 0.038                                            | 0.033                                          | 0.040                                                         |
| Parameters                                     | 178                                            | 192                                              | 373                                            | 169                                                           |
| Restraints                                     | 0                                              | 0                                                | 0                                              | 1                                                             |
| <i>wR</i> ( <i>F</i> <sup>2</sup> , all refl.) | 0.097                                          | 0.093                                            | 0.103                                          | 0.104                                                         |
| <i>R</i> ( <i>F</i> , >4σ( <i>F</i> ))         | 0.033                                          | 0.032                                            | 0.037                                          | 0.036                                                         |
| <i>S</i>                                       | 1.03                                           | 1.06                                             | 1.03                                           | 1.04                                                          |
| Max. Δρ (e Å <sup>-3</sup> )                   | 0.52, -0.25                                    | 0.55, -0.25                                      | 0.47, -0.23                                    | 0.42, -0.22                                                   |



## SUPPORTING INFORMATION

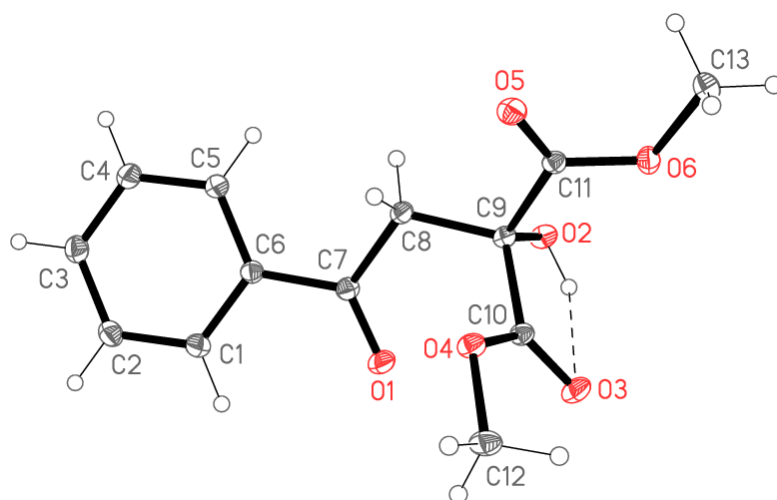

**Fig. S6.** Structure of compound **2a** in the crystal.

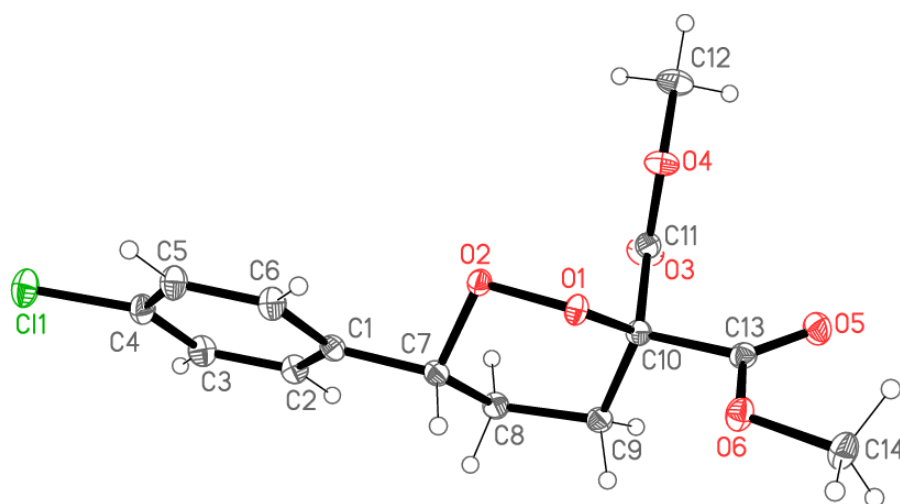

**Fig. S7.** Structure of compound **4f** in the crystal.

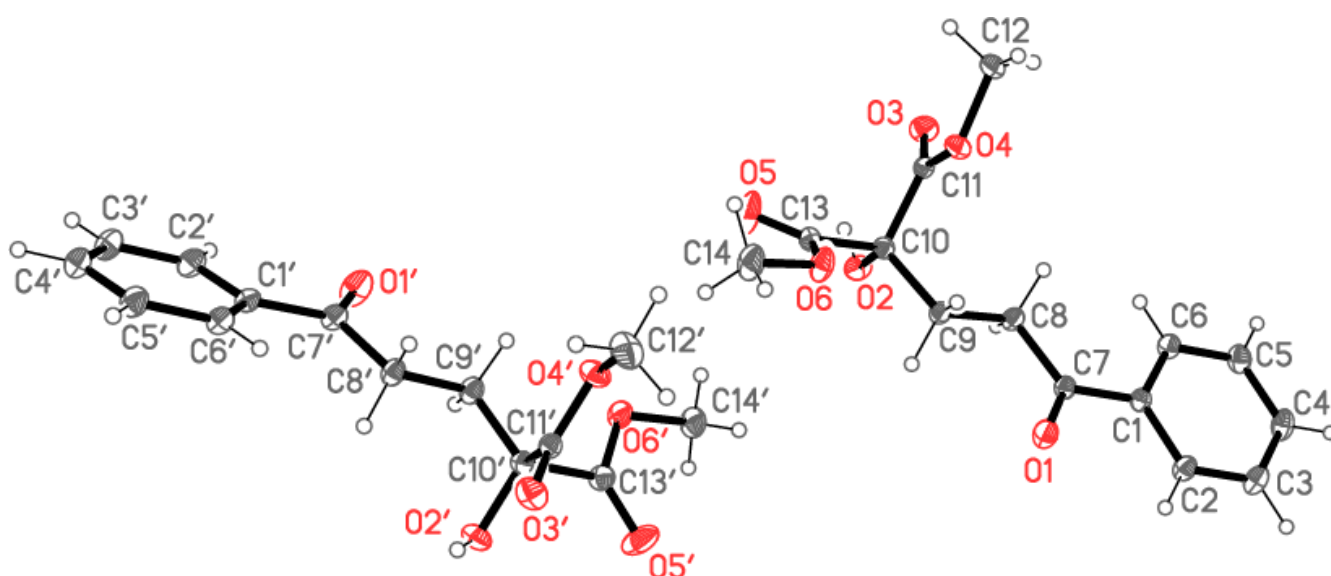

**Fig. S8.** Structure of compound **5a** in the crystal. The asymmetric unit consists of two independent molecules, which are closely similar (r.m.s. deviation 0.2 Å).

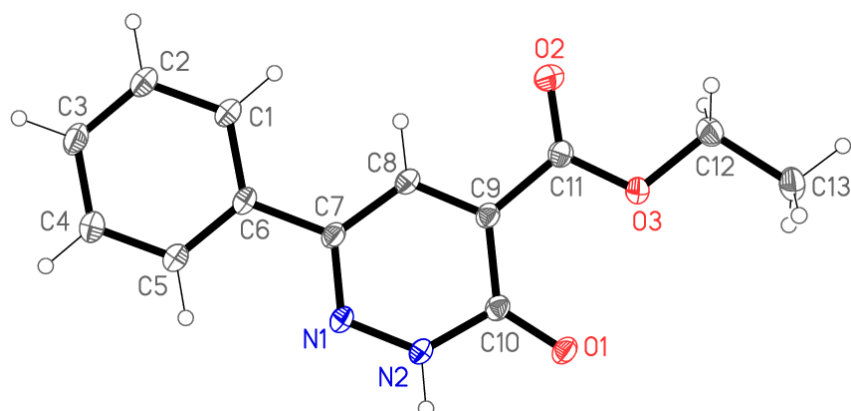

**Fig. S9.** Structure of compound **9** in the crystal.

### **Packing diagrams**

Numerical details of hydrogen bonds are given in the deposited CIF files. Hydrogen atoms not involved in hydrogen bonds are omitted for clarity. Compound **4f** does not display any unusually short contacts.

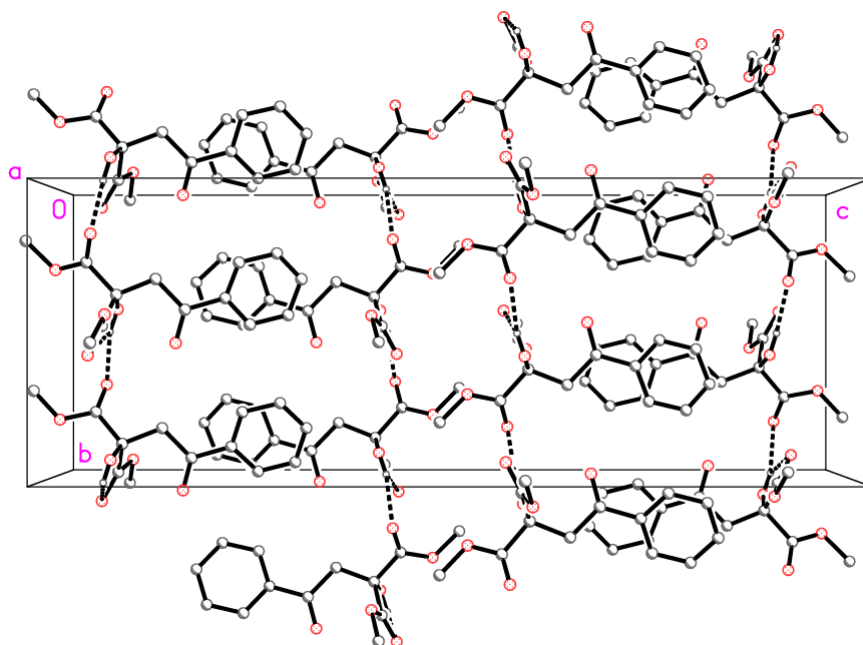

**Fig. S10.** Packing diagram of compound **2a**.

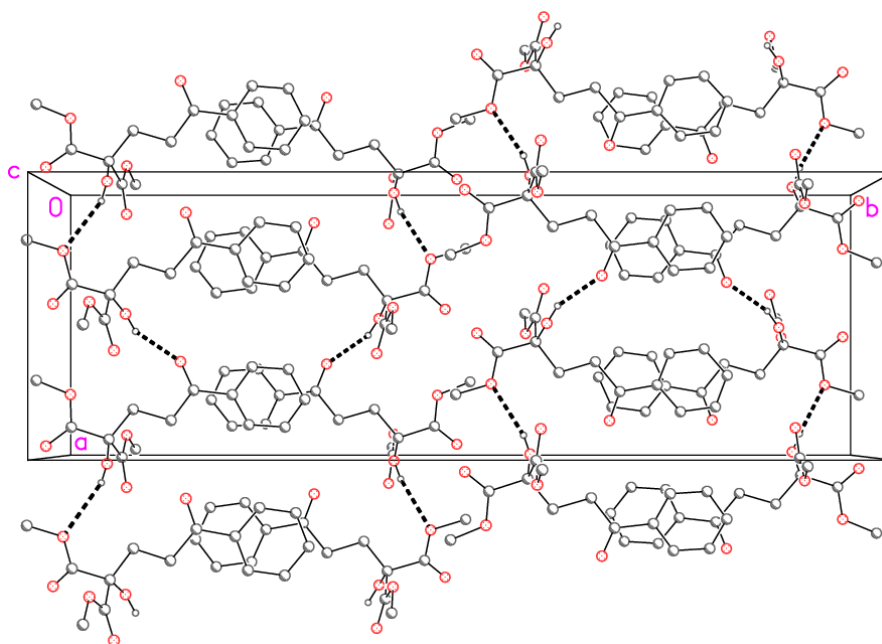

**Fig. S11.** Packing diagram of compound **5a**.

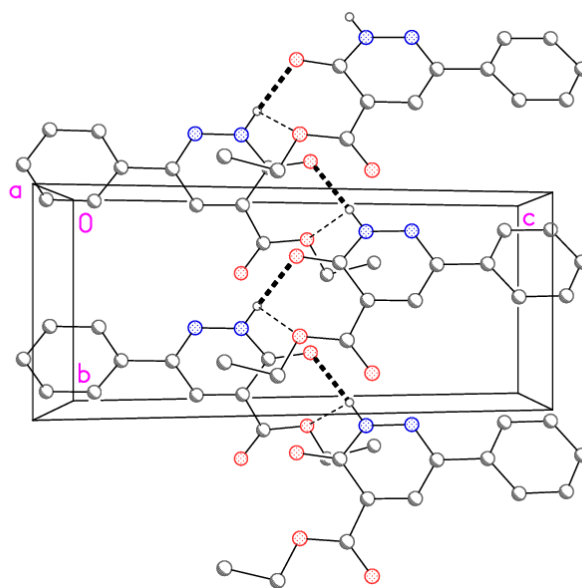

**Fig. S12.** Packing diagram of compound **9**. The three-centre hydrogen bonds are markedly asymmetric.

### 13. References

- [1] A. Kreft, S. Ehlers, P. G. Jones, D. B. Werz, *Org. Lett.* **2019**, *21*, 6315.
- [2] a) A. O. Chagarovskiy, O. A. Ivanova, E. R. Rakhmankulov, E. M. Budynina, I. V. Trushkov, M. Y. Melnikov, *Adv. Synth. Catal.* **2010**, *352*, 3179; b) A. U. Augustin, M. Busse, P. G. Jones, D. B. Werz, *Org. Lett.* **2018**, *20*, 820; c) A. Kreft, P. G. Jones, D. B. Werz, *Org. Lett.* **2018**, *20*, 2059.
- [3] Y. Matsumoto, D. Nakatake, R. Yazaki, T. Ohshima, *Chem. Eur. J.* **2018**, *24*, 6062.
- [4] a) D. A. Dias, M. A. Kerr, *Org. Lett.* **2009**, *11*, 3694; b) A. Ghanem, F. Lacrampe, V. Schurig, *Helv. Chim. Acta* **2005**, *88*, 216; c) M. K. Ghorai, R. Talukdar, D. P. Tiwari, *Org. Lett.* **2014**, *16*, 2204; d) S. R. Goudreau, D. Marcoux, A. B. Charette, *J. Org. Chem.* **2009**, *74*, 470; e) P. Müller, D. Fernandez, *Helv. Chim. Acta* **1995**, *78*, 947; f) T. Nishimura, Y. Maeda, T. Hayashi, *Angew. Chem. Int. Ed.* **2010**, *49*, 7324; *Angew. Chem.* **2010**, *122*, 7482.
- [5] C. Rodríguez, W. Borzęcka, J. H. Sattler, W. Kroutil, I. Lavandera, V. Gotor, *Org. Biomol. Chem* **2013**, *12*, 673.
- [6] Z. - Y. Chu, N. Li, D. Liang, Z.-H. Li, Y. - S. Zheng, J. - K. Liu, *Tetrahedron Lett.* **2018**, *59*, 715.
- [7] K. Tanaka, X. Chen, T. Kimura, F. Yoneda, *Chem. Pharm. Bull.* **1988**, *36*, 60.
- [8] A. T. Parsons, J. S. Johnson, *J. Am. Chem. Soc.* **2009**, *131*, 14202.
- [9] Y. - B. Wang, B. - Y. Liu, Q. Bu, B. Dai, N. Liu, *Adv. Synth. Catal.* **2020**, *362*, 2930.
- [10] R. K. Rej, T. Das, S. Hazra, S. Nanda, *Tetrahedron: Asymmetry* **2013**, *24*, 913.
- [11] L. Schreyer, P. S. J. Kaib, V. N. Wakchaure, C. Obradors, R. Properzi, S. Lee, B. List, *Science* **2018**, *362*, 216.
- [12] H. Kim, C. Lee, *Org. Lett.* **2011**, *13*, 2050.
- [13] J. P. Moerdyk, C. W. Bielawski, *Chem. Eur. J.* **2014**, *20*, 13487.
- [14] G. Casoni, E. Myers, V. Aggarwal, *Synthesis* **2016**, *48*, 3241.
- [15] G. Ragusa, M. Gómez-Cañas, P. Morales, C. Rodríguez-Cueto, M. R. Pazos, B. Asproni, E. Cichero, P. Fossa, G. A. Pinna, N. Jagerovic et al., *Eur. J. Med. Chem.* **2017**, *127*, 398.
- [16] F. Neese, *WIREs Comput Mol Sci.* **2012**, *2*, 73.
- [17] a) J. Tao, J. P. Perdew, V. N. Staroverov, G. E. Scuseria, *Phys. Rev. Lett.* **2003**, *91*, 146401; b) V. N. Staroverov, G. E. Scuseria, J. Tao, J. P. Perdew, *J. Chem. Phys.* **2003**, *119*, 12129.
- [18] F. Weigend, R. Ahlrichs, *Phys. Chem. Chem. Phys.* **2005**, *7*, 3297.
- [19] V. Barone, M. Cossi, *J. Phys. Chem. A* **1998**, *102*, 1995.
- [20] G. Henkelman, B. P. Uberuaga, H. Jónsson, *J. Chem. Phys.* **2000**, *113*, 9901.
- [21] P. - O. Löwdin, *J. Chem. Phys.* **1950**, *18*, 365.
- [22] a) G. Wentzel, *Z. Physik* **1926**, *38*, 518; b) H. A. Kramers, *Z. Physik* **1926**, *39*, 828; c) L. Brillouin, *CR Acad. Sci.* **1926**, *183.11*, 24.
- [23] J. Kästner, *Wiley Interdiscip. Rev. Comput. Mol. Sci.* **2013**, *4*, 586.
- [24] H. - H. Limbach, K. B. Schowen, R. L. Schowen, *J. Phys. Org. Chem.* **2010**, 586.

SUPPORTING INFORMATION

---

- [25] H. - H. Limbach, J. Miguel Lopez, A. Kohen, *Philos. Trans. R. Soc. Lond., B, Biol. Sci.* **2006**, 361, 1399.
- [26] a) J. D. Hunter, *Comput Sci Eng* **2007**, 9, 90; b) MATPLOTLIB Version 3.2.1 **2020**, DOI: 10.5281/zenodo.3714460.
- [27] G. M. Sheldrick, *Acta Cryst.* **2015**, 71, 3.
